# Supplementary material for: Interleukin 27 is a novel cytokine with anti-inflammatory effects against spondyloarthritis through the suppression of Th17 responses
Source: Front Immunol. 2023 Feb 2;13:1072420. doi: 10.3389/fimmu.2022.1072420 (PMC9933703; doi:10.3389/fimmu.2022.1072420)
Supplement: Supplementary file 1 [file Table_1.xlsx]

## Sheet: DiffTh17-_IL27_vs_DiffTh17
Description	Name	Ensembl ID	baseMean	log2FoldChange	lfcSE	stat	pvalue	padj
sperm equatorial segment protein 1 [Source:RGD Symbol;Acc:1563468]	Spesp1	ENSRNOG00000025359	0.264429512994833	-37.6610602599505	5.46070378463016	-6.89674110614686	5.32090227500946e-12	1.76844452901917e-08
fatty acid binding protein 12 [Source:RGD Symbol;Acc:1565000]	Fabp12	ENSRNOG00000038825	0.20528102089469	-36.8092618541965	5.45537701926576	-6.74733601806144	1.50584270281853e-11	3.90747358347623e-08
stabilin 2 [Source:RGD Symbol;Acc:628822]	Stab2	ENSRNOG00000038948	0.332254621429855	-35.9809322620301	5.45206433626115	-6.59950617653654	4.12529566328586e-11	9.51522363046123e-08
carboxylesterase 2I [Source:RGD Symbol;Acc:1565045]	Ces2i	ENSRNOG00000012034	0.564171472988767	-35.691684837869	3.59726158998378	-9.92190418879989	3.3431631836606e-23	6.94007245296105e-19
NA	NA	ENSRNOG00000057987	0.217416384803277	-34.0892419406168	5.48621685548858	-6.21361547283952	5.17791490806821e-10	8.95736129804901e-07
mKIAA1238 protein-like [Source:RGD Symbol;Acc:2318342]	LOC100362344	ENSRNOG00000036910	0.231104841941854	-32.3101766212775	5.48130206919653	-5.89461704780917	3.7555131424413e-09	5.19737982159592e-06
leucine-rich repeat-containing protein 23-like [Source:RGD Symbol;Acc:6491966]	Lrrc23	ENSRNOG00000026309	1.85608393977245	-32.0303731863402	5.4441582504674	-5.88343903919219	4.01828140350743e-09	5.21346897846318e-06
katanin p60 ATPase-containing subunit A-like 1-like [Source:RGD Symbol;Acc:6499844]	LOC103690050	ENSRNOG00000000916	1.08418377647362	-29.7989223168535	5.46937907621403	-5.4483190690598	5.08480807303472e-08	4.58937090383164e-05
60S ribosomal protein L9 pseudogene [Source:RGD Symbol;Acc:9187595]	LOC103692829	ENSRNOG00000061320	7.99340878166652	-29.0184495935204	5.43308869973126	-5.34105942259985	9.24049580585027e-08	7.37782509360176e-05
cathepsin Q-like 2 [Source:RGD Symbol;Acc:1303225]	Ctsql2	ENSRNOG00000048693	0.254255582208402	-29.0086270541402	5.47519638717074	-5.29818932561252	1.16956664619787e-07	8.67108357443626e-05
osteomodulin [Source:RGD Symbol;Acc:9400356]	Omd	ENSRNOG00000046658	1.13515579896278	-28.336491613094	5.44773639224107	-5.20151666175554	1.97668747209471e-07	0.000136780184110714
defective in cullin neddylation 1 domain containing 2 [Source:RGD Symbol;Acc:1582994]	Dcun1d2	ENSRNOG00000052837	4.69936013217808	-27.666207681321	4.8348884048598	-5.72220191339107	1.05152231803025e-08	1.24298883850614e-05
NA	NA	ENSRNOG00000061036	0.897512905021211	-26.0768485294339	5.46729075794226	-4.76961070554962	1.84582281813936e-06	0.000957935897043872
sushi, von Willebrand factor type A, EGF and pentraxin domain containing 1 [Source:RGD Symbol;Acc:1588987]	Svep1	ENSRNOG00000033110	0.307638444935759	-25.5680787987267	5.47635558911094	-4.66881275013729	3.02945333150614e-06	0.00139752048241635
NA	NA	ENSRNOG00000059079	0.400618291005179	-24.4312772228206	5.45014992605793	-4.48267984445919	7.37114750982781e-06	0.00283366020660214
15-hydroxyprostaglandin dehydrogenase [Source:RGD Symbol;Acc:620087]	Hpgd	ENSRNOG00000010610	0.338539553717794	-23.7690309864786	5.48330572583838	-4.33479951235882	1.45893025934331e-05	0.0045887777657133
transmembrane protein 232 [Source:RGD Symbol;Acc:1559548]	Tmem232	ENSRNOG00000031348	0.144664282052805	-23.5608056635972	5.48076665065669	-4.29881568863622	1.71713190700192e-05	0.00516607844310912
ring finger protein 113A1 [Source:RGD Symbol;Acc:1359693]	Rnf113a1	ENSRNOG00000059412	42.7578087026008	-23.1774417512224	5.46839790768376	-4.23843365872393	2.25084673605591e-05	0.0064007297799705
ribosomal protein S29 [Source:RGD Symbol;Acc:3596]	Rps29	ENSRNOG00000032542	0.192998570059955	-21.8776713217069	5.46375226495217	-4.00414774696934	6.22414578185422e-05	0.0130512163924759
NA	NA	ENSRNOG00000032866	0.183326077500092	-21.5211549831725	5.47112803171199	-3.9335864301531	8.36877270957519e-05	0.0167045531421223
prostaglandin E receptor 3 [Source:RGD Symbol;Acc:3435]	Ptger3	ENSRNOG00000010325	0.285815626791249	-20.8032020347165	5.46935273101641	-3.80359487819145	0.000142611336910993	0.0248778885960949
membrane spanning 4-domains A4A [Source:RGD Symbol;Acc:1307006]	Ms4a4e	ENSRNOG00000045611	0.401882951372391	-20.4148073739756	5.47366052323813	-3.72964441022706	0.000191750184748407	0.0306192715331995
solute carrier family 40 member 1 [Source:RGD Symbol;Acc:620180]	Slc40a1	ENSRNOG00000003872	0.285922437060137	-20.3984842942682	5.47363957069601	-3.72667656151031	0.000194021174405476	0.0306192715331995
eosinophil-associated, ribonuclease A family, member 1 [Source:RGD Symbol;Acc:2324564]	Ear1	ENSRNOG00000025515	0.125102166303162	-20.39601338574	5.47426729772713	-3.72579786051153	0.000194698388283748	0.0306192715331995
NA	NA	ENSRNOG00000062053	0.226778092485466	-20.221056308074	5.46903318151831	-3.69737312554762	0.000217842033851116	0.0331771999422083
microtubule associated serine/threonine kinase family member 4 [Source:RGD Symbol;Acc:1310139]	Mast4	ENSRNOG00000010720	0.721272158807184	-20.0925773890107	5.46909422139996	-3.67384005022088	0.00023893233354963	0.0354999856304816
SH3 domain binding kinase 1 [Source:RGD Symbol;Acc:628713]	Sbk1	ENSRNOG00000057696	26.724273755774	-19.9361159305593	4.72509627998973	-4.21919782142569	2.45173084458508e-05	0.00678606408036555
NA	NA	ENSRNOG00000053546	0.165709293354872	-19.7529297602374	5.46594322006709	-3.6138190546361	0.000301719665933391	0.0398942582491163
spermatogenesis-associated protein 13-like [Source:RGD Symbol;Acc:7698364]	LOC102553828	ENSRNOG00000051253	15.8076008105196	-19.6261684312856	2.2363439920042	-8.77600606233066	1.69382702231218e-18	1.75810775780893e-14
copine-1-like [Source:RGD Symbol;Acc:6495669]	Rbm12	ENSRNOG00000049913	30.7137517596203	-19.5448169496858	5.46227269547472	-3.57814741945746	0.000346038268150287	0.0430144216079749
methylphosphate capping enzyme [Source:RGD Symbol;Acc:1560550]	Mepce	ENSRNOG00000045911	22.1842544150743	-19.5280631656262	3.5487132997026	-5.5028573785498	3.73684710977563e-08	3.52605496144692e-05
carcinoembryonic antigen-related cell adhesion molecule 1-like [Source:RGD Symbol;Acc:9361803]	LOC103689942	ENSRNOG00000046222	1.06853803623879	-19.4457904394513	5.43241425199663	-3.57958534408605	0.00034413984523251	0.0430144216079749
similar to TDPOZ2 [Source:RGD Symbol;Acc:1566337]	RGD1566337	ENSRNOG00000054790	8.38752849822698	-3.23355329575009	0.851652256842577	-3.79680000818432	0.000146575946545968	0.0253564172862313
R-spondin 4 [Source:RGD Symbol;Acc:1563415]	Rspo4	ENSRNOG00000009662	11.6374566848304	-2.7601243076833	0.774346307856983	-3.5644572456502	0.000364609874510225	0.0447866058281524
polypeptide N-acetylgalactosaminyltransferase 9 [Source:RGD Symbol;Acc:1311523]	Galnt9	ENSRNOG00000037476	8.10896381732755	-2.71003147821238	0.755902512197834	-3.58516003648777	0.000336871567634806	0.0426961817676564
angiopoietin 1 [Source:RGD Symbol;Acc:628896]	Angpt1	ENSRNOG00000005854	20.5655536662885	-2.44894465019806	0.57129454481819	-4.2866585589005	1.81380752513435e-05	0.00537897577346629
C-C motif chemokine ligand 19 [Source:RGD Symbol;Acc:1310336]	Ccl19	ENSRNOG00000015668	17.0520646677609	-2.3007618047028	0.651265266734992	-3.53275680774022	0.000411250587765951	0.0485269387585136
dimethylarginine dimethylaminohydrolase 1 [Source:RGD Symbol;Acc:70968]	Ddah1	ENSRNOG00000014613	249.903933718955	-2.07090605101587	0.341555479949833	-6.06316154353619	1.33471484247333e-09	2.13133426268491e-06
acyl-CoA thioesterase 11 [Source:RGD Symbol;Acc:2324815]	Acot11	ENSRNOG00000007837	57.9088850401608	-1.98364483836571	0.284863785835279	-6.96348548675383	3.31955374335998e-12	1.3782123231682e-08
secreted protein acidic and cysteine rich [Source:RGD Symbol;Acc:3742]	Sparc	ENSRNOG00000012840	46.4754304063448	-1.90989215413407	0.51137734424414	-3.73480009552839	0.000187864353899742	0.0306192715331995
maestro heat-like repeat family member 7 [Source:RGD Symbol;Acc:1563440]	Mroh7	ENSRNOG00000058870	45.0571490831303	-1.89781269365035	0.471346114850663	-4.0263675330211	5.66451269167058e-05	0.0122489186423322
pyruvate dehydrogenase kinase 4 [Source:RGD Symbol;Acc:69061]	Pdk4	ENSRNOG00000009565	52.4811584723614	-1.84443498217341	0.352671445237764	-5.22989600399866	1.6960542206979e-07	0.000121408239887819
family with sequence similarity 151, member A [Source:RGD Symbol;Acc:1359194]	Fam151a	ENSRNOG00000007799	31.4417189636961	-1.69156376607359	0.404517085165643	-4.18168682635721	2.89354347301686e-05	0.00760342645017177
thrombospondin 1 [Source:RGD Symbol;Acc:1588455]	Thbs1	ENSRNOG00000045829	167.483050729299	-1.60956621722268	0.300485851139117	-5.35654577784926	8.48280153136212e-08	7.04377907958185e-05
taste receptor, type 2, member 117 [Source:RGD Symbol;Acc:2314258]	Tas2r117	ENSRNOG00000033896	41.5766449705877	-1.59302445206266	0.450530066807431	-3.53588932110842	0.000406404922536303	0.0484859757869604
TNF superfamily member 8 [Source:RGD Symbol;Acc:1590403]	Tnfsf8	ENSRNOG00000048321	801.889666835856	-1.55439081171883	0.220081554768668	-7.06279457791311	1.63186880872532e-12	8.46899115008224e-09
adhesion G protein-coupled receptor G1 [Source:RGD Symbol;Acc:628617]	Adgrg1	ENSRNOG00000014963	29.6249610794493	-1.54851760081575	0.433672286347466	-3.57070914966203	0.000356016047560488	0.0439912924482629
cysteine-rich secretory protein LCCL domain containing 2 [Source:RGD Symbol;Acc:620860]	Crispld2	ENSRNOG00000016752	22.7575221770718	-1.52587257502828	0.398464448919714	-3.82938196660984	0.0001284654807736	0.0229897837532687
transmembrane protein 176B [Source:RGD Symbol;Acc:708403]	Tmem176b	ENSRNOG00000008465	240.448587590139	-1.48004540333957	0.339323308115995	-4.36175578847542	1.29022838473158e-05	0.0042252252852693
fibronectin leucine rich transmembrane protein 3 [Source:RGD Symbol;Acc:1566005]	Flrt3	ENSRNOG00000004874	31.1032967918899	-1.44064149582152	0.373691250689067	-3.85516517490056	0.000115651517611397	0.0218255441281363
fatty acid desaturase 6 [Source:RGD Symbol;Acc:1311950]	Fads6	ENSRNOG00000021380	157.60942818302	-1.24042249558258	0.257456369605564	-4.81799109294896	1.45010842561168e-06	0.000785111563588662
calpain 5 [Source:RGD Symbol;Acc:620084]	Capn5	ENSRNOG00000014251	379.048251426848	-1.23869799799425	0.223118958061681	-5.55173800001258	2.82843294144346e-08	2.79597330625832e-05
BARX homeobox 2 [Source:RGD Symbol;Acc:1584840]	Barx2	ENSRNOG00000008592	204.108931366733	-1.22071109466107	0.268087648050279	-4.55340297674636	5.27850217900736e-06	0.00213493808071133
5'-nucleotidase domain containing 2 [Source:RGD Symbol;Acc:1305524]	Nt5dc2	ENSRNOG00000018358	247.977876024513	-1.18918463049105	0.267807843259046	-4.44043989160083	8.97751783354493e-06	0.0031587168255349
serine incorporator 2 [Source:RGD Symbol;Acc:1311396]	Serinc2	ENSRNOG00000012989	494.655456149658	-1.16810387976665	0.234869082166828	-4.97342548874501	6.5780064111934e-07	0.000426727609656137
C-C motif chemokine receptor 4 [Source:RGD Symbol;Acc:620594]	Ccr4	ENSRNOG00000010315	2082.1449396338	-1.16740315315108	0.180048155677813	-6.48383844175605	8.94179707941918e-11	1.85622765571663e-07
Cdc42 guanine nucleotide exchange factor 9 [Source:RGD Symbol;Acc:620719]	Arhgef9	ENSRNOG00000007733	143.806681778926	-1.16535735912447	0.298998173576935	-3.89754005913556	9.71747517852808e-05	0.0190306667199117
cytoskeleton-associated protein 4 [Source:RGD Symbol;Acc:1311989]	Ckap4	ENSRNOG00000008016	194.770150683844	-1.157273389542	0.272648290849189	-4.24456498860695	2.19017887158518e-05	0.00631471155489398
tensin 1 [Source:RGD Symbol;Acc:68427]	Tns1	ENSRNOG00000014182	105.001204346613	-1.13974413392326	0.276928948714992	-4.11565543873945	3.8608070364888e-05	0.00965620400849049
complement C3 [Source:RGD Symbol;Acc:2232]	C3	ENSRNOG00000046834	148.626467200174	-1.1349474492817	0.31260575763418	-3.63060315290114	0.000282759666769067	0.0378697285319939
kinesin family member 13A [Source:RGD Symbol;Acc:1307825]	Kif13a	ENSRNOG00000001455	166.850558258815	-1.13314685507071	0.181542896597675	-6.24175815362207	4.3267959551625e-10	8.16545065756531e-07
serum/glucocorticoid regulated kinase 1 [Source:RGD Symbol;Acc:3668]	Sgk1	ENSRNOG00000011815	1436.47518437969	-1.10378689935978	0.229191610517885	-4.8160004498666	1.46464192785643e-06	0.000785111563588662
cysteine-rich, angiogenic inducer, 61 [Source:RGD Symbol;Acc:620763]	Cyr61	ENSRNOG00000014350	56.1766828578634	-1.08025157012875	0.300571124021343	-3.59399650796811	0.000325644202088538	0.0418706723959767
nucleotide-binding oligomerization domain containing 2 [Source:RGD Symbol;Acc:1306368]	Nod2	ENSRNOG00000014124	47.2477509227941	-1.04080258169909	0.290464478889333	-3.58323532598159	0.000339364612537372	0.0426961817676564
platelet derived growth factor subunit B [Source:RGD Symbol;Acc:3283]	Pdgfb	ENSRNOG00000017197	106.325566498155	-1.02302972202209	0.2577396573633	-3.96923675808284	7.21032132848038e-05	0.0146744176919533
RAR-related orphan receptor C [Source:RGD Symbol;Acc:1595785]	Rorc	ENSRNOG00000020836	499.387741951886	-1.02072244438687	0.246402001829455	-4.14250873291749	3.43527283320052e-05	0.00869668643224507
neutrophil cytosolic factor 4 [Source:RGD Symbol;Acc:1593157]	Ncf4	ENSRNOG00000006940	112.357694573179	-1.01012763477125	0.230184242680868	-4.38834397614139	1.14217029458262e-05	0.00388693658118697
interleukin 1 receptor type 1 [Source:RGD Symbol;Acc:2892]	Il1r1	ENSRNOG00000014504	614.068245068641	-0.994891131956631	0.273280933180479	-3.64054352558724	0.000272063108986583	0.0369100699003061
placenta expressed transcript 1 [Source:RGD Symbol;Acc:1359217]	Plet1	ENSRNOG00000024346	5626.15350214772	-0.991850928948315	0.246677826352805	-4.02083536900371	5.799212441428e-05	0.0122842705175106
toll-like receptor 5 [Source:RGD Symbol;Acc:631351]	Tlr5	ENSRNOG00000022067	662.703653741014	-0.983849448206966	0.253195968852254	-3.88572319167161	0.000102025707914304	0.0197939408466638
latent transforming growth factor beta binding protein 3 [Source:RGD Symbol;Acc:62057]	Ltbp3	ENSRNOG00000020813	569.487866416276	-0.961112001688884	0.26219804715276	-3.66559557603771	0.000246763629441334	0.0355733762748101
junction plakoglobin [Source:RGD Symbol;Acc:620412]	Jup	ENSRNOG00000015380	270.568070424501	-0.942414791128329	0.245940369783617	-3.8318832811282	0.000127166070218542	0.0229551343623193
ABI family member 3 binding protein [Source:RGD Symbol;Acc:1562717]	Abi3bp	ENSRNOG00000001627	327.724860930891	-0.912689936133951	0.234101412857919	-3.89869469385852	9.67126225924473e-05	0.0190306667199117
ST3 beta-galactoside alpha-2,3-sialyltransferase 3 [Source:RGD Symbol;Acc:68414]	St3gal3	ENSRNOG00000019843	48.0213184333102	-0.912477995748221	0.248406513368405	-3.67332556370996	0.000239414133063608	0.0354999856304816
NA	NA	ENSRNOG00000045857	45.3768993529972	-0.906105234885399	0.248208226644671	-3.6505850234471	0.00026164367814727	0.0362097407643945
Fc gamma receptor II beta [Source:RGD Symbol;Acc:1594388]	LOC498276	ENSRNOG00000046663	166.685045554143	-0.900332402166283	0.242654526128222	-3.71034662543461	0.000206975661258828	0.0318267240894223
neuronal vesicle trafficking associated 2 [Source:RGD Symbol;Acc:1563944]	Nsg2	ENSRNOG00000020644	366.458803718213	-0.886049729234824	0.230122670405299	-3.85033655169344	0.000117955626827712	0.0218628647974686
PATJ, crumbs cell polarity complex component [Source:RGD Symbol;Acc:1565362]	Patj	ENSRNOG00000007551	1807.98174351071	-0.873418955992827	0.215956889639814	-4.04441348201285	5.24542740513019e-05	0.0120129508343647
tescalcin [Source:RGD Symbol;Acc:1566317]	Tesc	ENSRNOG00000001128	97.2230285564436	-0.85121666941094	0.231171078043553	-3.68219362307324	0.000231235679001299	0.0347842134810723
laminin subunit alpha 5 [Source:RGD Symbol;Acc:621023]	Lama5	ENSRNOG00000053691	981.753395872457	-0.839021157917663	0.142239521822821	-5.89865001769886	3.66487665070985e-09	5.19737982159592e-06
ST6 beta-galactoside alpha-2,6-sialyltransferase 1 [Source:RGD Symbol;Acc:3676]	St6gal1	ENSRNOG00000001823	1033.94544727463	-0.837216166827385	0.170389617609993	-4.91353979526911	8.94465668810458e-07	0.00051578368941212
receptor activity modifying protein 3 [Source:RGD Symbol;Acc:61873]	Ramp3	ENSRNOG00000053766	523.99394737521	-0.832557948070605	0.206908140352625	-4.0238047021819	5.72654104483036e-05	0.0122553882009931
insulin-like growth factor binding protein 4 [Source:RGD Symbol;Acc:2875]	Igfbp4	ENSRNOG00000010635	532.266849099757	-0.79886194183162	0.213205697872363	-3.74690709396455	0.000179028355143342	0.0295608714219328
olfactomedin 1 [Source:RGD Symbol;Acc:620320]	Olfm1	ENSRNOG00000009862	1444.80204916	-0.766195752290948	0.171480278994472	-4.46812751171025	7.89072677241067e-06	0.00288790862667153
transcriptional regulating factor 1 [Source:RGD Symbol;Acc:1307167]	Trerf1	ENSRNOG00000022598	495.675577932471	-0.764425066317258	0.164804273486156	-4.63838133652203	3.51148449871547e-06	0.00155095546189009
lysosomal protein transmembrane 4 beta [Source:RGD Symbol;Acc:1311853]	Laptm4b	ENSRNOG00000006766	1344.06930704064	-0.76141240669156	0.154499996761294	-4.9282357453247	8.29754628341714e-07	0.000492139323707018
anoctamin 9 [Source:RGD Symbol;Acc:1560565]	Ano9	ENSRNOG00000015830	181.044304687584	-0.757737668799225	0.175259834565619	-4.32351012242636	1.53566088725057e-05	0.00475802751618425
Mdm1 nuclear protein [Source:RGD Symbol;Acc:1561092]	Mdm1	ENSRNOG00000007286	2692.97125357735	-0.749914874963781	0.139932386605935	-5.35912302471925	8.36268960256867e-08	7.04377907958185e-05
folliculin interacting protein 2 [Source:RGD Symbol;Acc:1562174]	Fnip2	ENSRNOG00000027833	203.567634008721	-0.738491768594864	0.196659514848529	-3.75517944892556	0.000173217326457403	0.0289985361284615
interleukin 1 receptor-like 2 [Source:RGD Symbol;Acc:621782]	Il1rl2	ENSRNOG00000014683	162.292850254188	-0.71736451395086	0.196109362086377	-3.65798198677988	0.000254208907900348	0.035656234588536
Kruppel like factor 3 [Source:RGD Symbol;Acc:1593290]	Klf3	ENSRNOG00000002163	1096.40545991887	-0.711838689025248	0.191231702304205	-3.72238849755611	0.000197347066192651	0.0306689167828848
interferon gamma receptor 2 [Source:RGD Symbol;Acc:1307532]	Ifngr2	ENSRNOG00000002032	955.653874743146	-0.673634783540827	0.15056471119002	-4.47405489783504	7.67500228926085e-06	0.00288790862667153
tubulin, beta 4A class IVa [Source:RGD Symbol;Acc:619730]	Tubb4a	ENSRNOG00000047505	221.134593991877	-0.672804569059647	0.144901504110637	-4.64318554309788	3.43077991350186e-06	0.00154825130922576
legumain [Source:RGD Symbol;Acc:619832]	Lgmn	ENSRNOG00000007089	3036.14592926051	-0.66543054820576	0.171582850396339	-3.87818798130864	0.000105237388586451	0.0202279902746865
dipeptidylpeptidase 4 [Source:RGD Symbol;Acc:2515]	Dpp4	ENSRNOG00000030763	1654.7762078177	-0.657576803125585	0.128345520012312	-5.12348855700226	2.99933856686387e-07	0.000200849255837184
transforming growth factor, beta receptor 1 [Source:RGD Symbol;Acc:3852]	Tgfbr1	ENSRNOG00000007036	878.568521664841	-0.653833970319384	0.135802502808875	-4.81459440581574	1.47499161712789e-06	0.000785111563588662
MARVEL domain containing 1 [Source:RGD Symbol;Acc:1309811]	Marveld1	ENSRNOG00000042620	304.109223182636	-0.651819520281929	0.178110526468543	-3.65963502104997	0.000252574732960284	0.035656234588536
reticulon 4 receptor-like 1 [Source:RGD Symbol;Acc:727812]	Rtn4rl1	ENSRNOG00000003121	287.301660637351	-0.641437270940477	0.15863439906338	-4.04349418995939	5.26604617721081e-05	0.0120129508343647
transmembrane protein 144 [Source:RGD Symbol;Acc:1565845]	Tmem144	ENSRNOG00000010081	164.555027651015	-0.624430134937536	0.162433808248507	-3.84421286227693	0.000120939997564135	0.0220227492055604
progestin and adipoQ receptor family member 5 [Source:RGD Symbol;Acc:1311259]	Paqr5	ENSRNOG00000014164	185.820902448865	-0.60930638883121	0.144550973903803	-4.21516626540817	2.49594237815903e-05	0.00681753524055308
CD226 molecule [Source:RGD Symbol;Acc:1311513]	Cd226	ENSRNOG00000038197	1229.40198047337	-0.564119445623972	0.147966167073677	-3.81248941417182	0.000137574123218284	0.0242025527448165
runt-related transcription factor 1 [Source:RGD Symbol;Acc:2283]	Runx1	ENSRNOG00000001704	386.604135975342	-0.559420273997471	0.138750820925645	-4.0318339759392	5.53432792151758e-05	0.0120933803497667
similar to RIKEN cDNA 4931406C07 [Source:RGD Symbol;Acc:1309534]	RGD1309534	ENSRNOG00000010887	184.357933800438	-0.543542926308676	0.149370548639733	-3.63888953517636	0.000273816212950871	0.0369100699003061
protein kinase cAMP-dependent type 2 regulatory subunit beta [Source:RGD Symbol;Acc:3394]	Prkar2b	ENSRNOG00000009079	1512.5084995436	-0.535138140521722	0.112590055412638	-4.75297874719453	2.00441424713266e-06	0.00100241141732404
galactosidase, beta 1 [Source:RGD Symbol;Acc:1597145]	Glb1	ENSRNOG00000010196	2475.01707628104	-0.511262664177562	0.121857770568918	-4.19556883234142	2.72187607446371e-05	0.00733810719867429
FYN binding protein 1 [Source:RGD Symbol;Acc:1563421]	Fyb1	ENSRNOG00000013886	1867.54414317495	-0.46908566843681	0.11811934873448	-3.97128559768194	7.14858186260654e-05	0.0146744176919533
sushi domain containing 3 [Source:RGD Symbol;Acc:1310933]	Susd3	ENSRNOG00000016525	539.936662955415	-0.397225405798136	0.111641851251241	-3.55803313315014	0.000373642190883274	0.0453592879564086
integral membrane protein 2A [Source:RGD Symbol;Acc:1559423]	Itm2a	ENSRNOG00000002365	798.411154585451	-0.360051193546365	0.093586996578608	-3.84723526461223	0.000119458246737894	0.0219454313631146
hypothetical protein LOC687560 [Source:RGD Symbol;Acc:1584205]	LOC687560	ENSRNOG00000050028	0.329892796244661	38.9799856250995	5.47434759657918	7.12048055725533	1.07551404854588e-12	7.44219871125461e-09
NA	NA	ENSRNOG00000059863	0.459618836293277	37.6098732268396	5.46613446935897	6.88052469943174	5.96325049527155e-12	1.76844452901917e-08
glutathione S-transferase, mu 5 [Source:RGD Symbol;Acc:61964]	Gstm5	ENSRNOG00000058357	20.4280643131659	30.9917775070708	5.4200285433555	5.71801001768969	1.07778790370974e-08	1.24298883850614e-05
NA	NA	ENSRNOG00000060104	0.261988762591103	30.4770240245049	5.44493866170518	5.59731264538442	2.17699909834569e-08	2.25961621412791e-05
NA	NA	ENSRNOG00000058438	1.45589799912453	30.2982577629524	5.39565741670134	5.61530420170289	1.96216732670059e-08	2.14382271236724e-05
Fas apoptotic inhibitory molecule [Source:RGD Symbol;Acc:620572]	Faim	ENSRNOG00000030069	8.12049703490184	28.7574251834612	5.39510776240792	5.33027817976825	9.80624422832482e-08	7.53954903465907e-05
paired-like homeobox 2a [Source:RGD Symbol;Acc:621323]	Phox2a	ENSRNOG00000019706	0.284685319656231	26.9481568495513	5.46585533302559	4.93027261199654	8.21149463932727e-07	0.000492139323707018
NA	NA	ENSRNOG00000026234	0.223662576071435	25.9405202064862	5.46046759192238	4.75060418724209	2.02809766981116e-06	0.00100241141732404
H2A histone family, member J [Source:RGD Symbol;Acc:1592176]	LOC103690002	ENSRNOG00000045819	6.97082846357938	24.9069396078464	5.46317210313266	4.55906186692607	5.13826341592797e-06	0.00213330420502498
serine protease inhibitor A3F-like [Source:RGD Symbol;Acc:6502633]	RGD1565462	ENSRNOG00000029949	7.19698494749042	23.9080572306774	5.46113231832696	4.37785716168138	1.19851853215777e-05	0.00401291067888114
NA	NA	ENSRNOG00000062010	0.313126295992615	23.0459780063545	5.45945845862487	4.22129377501652	2.42904120271445e-05	0.00678606408036555
NA	NA	ENSRNOG00000049946	0.923460441886978	22.6923484476918	5.46693775994456	4.15083350938349	3.31266678356196e-05	0.00848983330369909
hemoglobin subunit beta-2-like [Source:RGD Symbol;Acc:9285450]	LOC103694855	ENSRNOG00000060629	0.513382655227919	22.3758684896324	5.44664792471649	4.10819072554559	3.98770741272186e-05	0.00978977200101767
G protein-coupled receptor 1 [Source:RGD Symbol;Acc:2728]	Gpr1	ENSRNOG00000045532	0.35857173698947	22.0743510876089	5.43712475967516	4.05993094941005	4.90872303656949e-05	0.0117126645420858
NA	NA	ENSRNOG00000062251	0.387798062558569	21.9791537285412	5.44665731377703	4.03534727124214	5.45215960893374e-05	0.0120933803497667
low affinity immunoglobulin gamma Fc region receptor III-like [Source:RGD Symbol;Acc:9277665]	LOC103694908	ENSRNOG00000058500	0.407436151380135	20.8959920960864	5.46686021087822	3.82230225212391	0.000132211493732186	0.023457935028944
NA	NA	ENSRNOG00000052397	0.410173556516377	20.4761131337692	5.4281923761814	3.77217897133071	0.000161828108741667	0.0275359812243301
NA	NA	ENSRNOG00000045917	0.296818919433033	20.2209013883412	5.47090553070572	3.6960794286888	0.000218954496463343	0.0331771999422083
NA	NA	ENSRNOG00000055947	0.315197964402584	19.3059134195873	5.46500141238845	3.53264564137591	0.000411423537814846	0.0485269387585136
patatin-like phospholipase domain containing 2 [Source:RGD Symbol;Acc:1309044]	Pnpla2	ENSRNOG00000047551	169.303187398413	10.5885301903273	2.82635706384636	3.74635261969253	0.000179424336392097	0.0295608714219328
interferon, alpha 4 [Source:RGD Symbol;Acc:1306334]	Ifna4	ENSRNOG00000033823	5.56799718139766	3.12457250714422	0.857343514736693	3.6444814166511	0.000267931492965635	0.0365920385689054
forkhead box B1 [Source:RGD Symbol;Acc:1305217]	Foxb1	ENSRNOG00000010547	26.1052472763686	2.63224549158231	0.533591059484481	4.93307645395223	8.09444528336698e-07	0.000492139323707018
interleukin 3 [Source:RGD Symbol;Acc:2897]	Il3	ENSRNOG00000026786	149.605628224659	2.56955452014935	0.564655821649739	4.55065620795683	5.34788670923402e-06	0.00213493808071133
serine/threonine/tyrosine kinase 1 [Source:RGD Symbol;Acc:1564211]	Styk1	ENSRNOG00000010347	53.943940861779	2.26710438112742	0.540790305588698	4.19220603198403	2.7625493029135e-05	0.00735227704861299
similar to BC049975 protein [Source:RGD Symbol;Acc:1565462]	RGD1565462	ENSRNOG00000048191	154.293668627359	2.25696739426283	0.527599238309317	4.27780639239595	1.88744068479531e-05	0.00551850439093886
interferon gamma [Source:RGD Symbol;Acc:2866]	Ifng	ENSRNOG00000007468	607.833877573946	2.10640172124077	0.595522652868648	3.53706397413126	0.000404601648624728	0.0484859757869604
acyl-CoA synthetase long-chain family member 6 [Source:RGD Symbol;Acc:69403]	Acsl6	ENSRNOG00000026745	10.8011042155641	2.0499056596153	0.578890440024169	3.54109433821315	0.000398471078172246	0.0480922157661492
similar to serine (or cysteine) peptidase inhibitor, clade A, member 3B [Source:RGD Symbol;Acc:1595900]	LOC299277	ENSRNOG00000037743	59.2572761510409	1.88827363895533	0.402682701181085	4.68923455965938	2.74228904527393e-06	0.00129379950661003
FGR proto-oncogene, Src family tyrosine kinase [Source:RGD Symbol;Acc:621319]	Fgr	ENSRNOG00000009912	47.0391217728139	1.73604112251602	0.481318385540663	3.60684564452265	0.000309941907216447	0.04045811604869
C-C motif chemokine ligand 3 [Source:RGD Symbol;Acc:3647]	Ccl3	ENSRNOG00000011205	878.456455374594	1.70787752433824	0.415889482594943	4.10656579647539	4.01585106786317e-05	0.00978977200101767
cytokine-dependent hematopoietic cell linker [Source:RGD Symbol;Acc:1562417]	Clnk	ENSRNOG00000051169	120.813818764029	1.57268820547201	0.405880436492877	3.87475735234065	0.00010673099596538	0.0203268692224342
NA	NA	ENSRNOG00000051046	40.0685260067646	1.56326213588083	0.444489823764272	3.51698070979884	0.000436485502009015	0.0509045086303659
Ly49 stimulatory receptor 6 [Source:RGD Symbol;Acc:1549735]	Ly49s6	ENSRNOG00000053337	94.4643767984428	1.50502900592107	0.320672808819818	4.69334775050018	2.68770035347865e-06	0.00129379950661003
TBK1 binding protein 1 [Source:RGD Symbol;Acc:631328]	Tbkbp1	ENSRNOG00000009370	915.009073048483	1.4562565967326	0.397001312919334	3.66814050569272	0.000244320915530851	0.0355733762748101
semaphorin 6A [Source:RGD Symbol;Acc:1305493]	Sema6a	ENSRNOG00000004033	81.0354105438857	1.36456108684609	0.31408336776557	4.34458244813713	1.39540828219359e-05	0.0044565046969318
T-box 21 [Source:RGD Symbol;Acc:1308264]	Tbx21	ENSRNOG00000009427	3017.36623954981	1.31723446057856	0.295122232499954	4.46335218265457	8.06872683399725e-06	0.00288790862667153
MAF bZIP transcription factor [Source:RGD Symbol;Acc:3034]	Maf	ENSRNOG00000012428	1161.44935832107	1.13970478193844	0.281323502370622	4.05122491485608	5.0950202141804e-05	0.0120129508343647
2'-5' oligoadenylate synthetase-like 2 [Source:RGD Symbol;Acc:1307351]	Oasl2	ENSRNOG00000028814	1018.24085896114	1.10862138633316	0.314365798324507	3.52653307784064	0.000421038567721968	0.0493804498719793
NA	NA	ENSRNOG00000038258	161.52554153261	1.09116030049393	0.28321265785137	3.8527949589971	0.000116777174808583	0.0218394357824449
killer cell lectin-like receptor, family E, member 1 [Source:RGD Symbol;Acc:727903]	Klre1	ENSRNOG00000058714	503.924914599639	1.00073478943995	0.243826881896253	4.10428407916791	4.0556885788695e-05	0.00978977200101767
leucine rich repeat containing 4C [Source:RGD Symbol;Acc:1311013]	Lrrc4c	ENSRNOG00000029798	80.1687522168935	0.997132646391251	0.265208714639897	3.759803473069	0.00017004688789291	0.0286992141932433
growth regulating estrogen receptor binding 1 [Source:RGD Symbol;Acc:1564091]	Greb1	ENSRNOG00000024651	438.520680089364	0.927338294636434	0.206514433539817	4.49042848357443	7.10800383971361e-06	0.00278405757940783
jagged 1 [Source:RGD Symbol;Acc:2937]	Jag1	ENSRNOG00000007443	88.6546331878747	0.925738314179308	0.248747771313567	3.72159440581415	0.00019796882551696	0.0306689167828848
zinc finger and BTB domain containing 32 [Source:RGD Symbol;Acc:1584121]	Zbtb32	ENSRNOG00000042465	5808.6697465362	0.835940812537862	0.182488319552304	4.58079078479469	4.63221060931279e-06	0.00200333458414009
interferon regulatory factor 8 [Source:RGD Symbol;Acc:1312024]	Irf8	ENSRNOG00000017869	1256.65044358717	0.822484226107292	0.20363011763352	4.03910892782346	5.36546452248253e-05	0.0120933803497667
interferon regulatory factor 7 [Source:RGD Symbol;Acc:1307828]	Irf7	ENSRNOG00000017414	2089.57544474459	0.815747488504004	0.218872808104722	3.72703898473172	0.000193742500523818	0.0306192715331995
huntingtin interacting protein 1 related [Source:RGD Symbol;Acc:621615]	Hip1r	ENSRNOG00000001091	1150.72602741876	0.804906908944441	0.183210026865959	4.39335620824581	1.11614022671298e-05	0.00386165916105578
NA	NA	ENSRNOG00000023122	385.617315160208	0.766176780933698	0.209850072339677	3.65106750925257	0.000261152577380671	0.0362097407643945
coiled-coil domain containing 150 [Source:RGD Symbol;Acc:1304775]	Ccdc150	ENSRNOG00000013318	205.129566760906	0.668574328676263	0.182335938380882	3.66671723969017	0.000245684206956114	0.0355733762748101
interferon induced transmembrane protein 1 [Source:RGD Symbol;Acc:1307601]	Ifitm1	ENSRNOG00000004273	5974.57599569312	0.638931826309824	0.153501275032223	4.16238774678387	3.14936973258777e-05	0.00817222078484869
BTB domain containing 3 [Source:RGD Symbol;Acc:1311623]	Btbd3	ENSRNOG00000008088	198.568316896656	0.574267124505261	0.158519439731163	3.62269211573782	0.00029155277252928	0.0387970769547137
SH3-domain binding protein 2 [Source:RGD Symbol;Acc:1310588]	Sh3bp2	ENSRNOG00000013747	1457.07635231235	0.541941430512593	0.150827875086765	3.59311188466214	0.00032675220040215	0.0418706723959767
NA	NA	ENSRNOG00000028837	168.884364150306	0.529003431869346	0.131180766014809	4.03262953815673	5.51561934939596e-05	0.0120933803497667
SH2 domain containing 2A [Source:RGD Symbol;Acc:1303076]	Sh2d2a	ENSRNOG00000013294	4313.13158106297	0.523865013783482	0.142989797814703	3.66365308427351	0.000248643497707815	0.0355971749580451
programmed cell death 1 ligand 2 [Source:RGD Symbol;Acc:1306403]	Pdcd1lg2	ENSRNOG00000016136	1038.48460029361	0.512817511707997	0.13740704743538	3.73210487583735	0.000189886407907226	0.0306192715331995
polo-like kinase 3 [Source:RGD Symbol;Acc:62039]	Plk3	ENSRNOG00000018484	1012.60434663759	0.501728400236229	0.116442130306173	4.30882189218787	1.64126471190093e-05	0.00501044325799286
H1 histone family, member O, oocyte-specific [Source:RGD Symbol;Acc:1566236]	H1foo	ENSRNOG00000025251	188.046908331835	0.468608934389409	0.123719689877444	3.78766657800071	0.000152068729771344	0.0260892129034986
1-acylglycerol-3-phosphate O-acyltransferase 4 [Source:RGD Symbol;Acc:619916]	Agpat4	ENSRNOG00000017731	1118.72924087841	0.425880242365266	0.118801199744228	3.58481432243244	0.000337318098913347	0.0426961817676564
S100 calcium binding protein A10 [Source:RGD Symbol;Acc:628655]	S100a10	ENSRNOG00000023226	3490.1996730151	0.423982242630137	0.097251180772508	4.3596616438203	1.30263701650964e-05	0.0042252252852693
Y box protein 1 related, pseudogene 3 [Source:RGD Symbol;Acc:1590933]	Ybx1-ps3	ENSRNOG00000032902	3612.79177914287	0.393067275704535	0.110387101633548	3.56080801006444	0.000369715344493184	0.0451465931549059
dual adaptor of phosphotyrosine and 3-phosphoinositides 1 [Source:RGD Symbol;Acc:1310189]	Dapp1	ENSRNOG00000010575	575.916335831196	0.38781433742816	0.084966833605475	4.5643025751541	5.01157556700515e-06	0.00212316933051959
GTPase, IMAP family member 5 [Source:RGD Symbol;Acc:628871]	Gimap5	ENSRNOG00000008416	4482.16504341308	0.370435224727798	0.0928017738514609	3.99168258702381	6.56061471507587e-05	0.013619180087026
Werner helicase interacting protein 1 [Source:RGD Symbol;Acc:628836]	Wrnip1	ENSRNOG00000017040	2138.2607063359	0.356071564180839	0.0898988289380085	3.96080314267914	7.46980964793963e-05	0.0150549299496678
phosphoinositide-3-kinase, regulatory subunit 5 [Source:RGD Symbol;Acc:1563261]	Pik3r5	ENSRNOG00000023428	3502.7041762835	0.334196810967196	0.074828708473646	4.46615767910651	7.96369246400545e-06	0.00288790862667153
VPS37B, ESCRT-I subunit [Source:RGD Symbol;Acc:1304576]	Vps37b	ENSRNOG00000001086	799.401773786256	0.264937969994726	0.072657994138758	3.64637054924421	0.000265970368072965	0.0365647607339515
transducin-like enhancer of split 3 [Source:RGD Symbol;Acc:620292]	Tle3	ENSRNOG00000013013	3332.68024286459	0.258793891423197	0.0639447809512649	4.04714642185475	5.18458122268853e-05	0.0120129508343647
solute carrier family 25 member 37 [Source:RGD Symbol;Acc:1359361]	Slc25a37	ENSRNOG00000015495	1109.70942020427	0.250305444673503	0.0682732376973412	3.66623076794922	0.000246151813419602	0.0355733762748101
cysteine and serine rich nuclear protein 1 [Source:RGD Symbol;Acc:1305999]	Csrnp1	ENSRNOG00000033433	4732.71915186669	0.244369753116206	0.067666933598086	3.61136141571987	0.000304593835983544	0.040019388868243
BCL2-antagonist/killer 1 [Source:RGD Symbol;Acc:621635]	Bak1	ENSRNOG00000000485	2824.08780326263	0.193461770465774	0.0536608567745642	3.60526801274401	0.000311830944062354	0.04045811604869
Down-regulated genes
up-regulated genes
