# Supplementary material for: Interleukin 27 is a novel cytokine with anti-inflammatory effects against spondyloarthritis through the suppression of Th17 responses
Source: Front Immunol. 2023 Feb 2;13:1072420. doi: 10.3389/fimmu.2022.1072420 (PMC9933703; doi:10.3389/fimmu.2022.1072420)
Supplement: Supplementary file 2 [file Table_2.xlsx]

## Sheet: RNAseq_synthesis
	DC_B27vsDC_NTG		IL27vsCTRL		IL27+AG40vsAG490		IL27+AG40vsCTRL		AG490vsCTRL
gene	padj_DC	log2FC_DC	padj_IL27	log2FC_IL27	padj_IL27-AGvsAG	log2FC_IL27-AGvsAG	padj_IL27-AG	log2FC_IL27-AG	padj_AG	log2FC_AG	gene_ensembl	gene_description
A4gnt	0.8792	0.151571	0.792981	0.513228	0.999979	-0.545264	0.843317	0.204004	0.805436	0.267447	ENSRNOG00000042649	alpha-1,4-N-acetylglucosaminyltransferase(A4gnt)
Aaas	0.0033039	-0.340512	0.99487	-0.00665904	0.999979	0.0728233	0.0414818	-0.334642	0.0120241	-0.423895	ENSRNOG00000013445	aladin WD repeat nucleoporin(Aaas)
AABR07045684,1	0.119696	-0.353897	0.779053	-0.141087	0.999979	-0.103688	0.0482627	-0.408228	0.227901	-0.280639	ENSRNOG00000052347	NFKB repressing factor(Nkrf)
Aacs	0.82117	0.0319735	0.692139	0.109271	0.999979	0.0237467	0.194083	-0.17134	0.19694	-0.179632	ENSRNOG00000000967	acetoacetyl-CoA synthetase(Aacs)
Aagab	0.318515	0.137649	0.711513	0.101998	0.661299	0.182835	0.820543	0.0364022	0.296427	-0.146784	ENSRNOG00000008424	alpha- and gamma-adaptin binding protein(Aagab)
Aak1	0.131457	0.706323	0.737124	0.28287	0.999979	0.425996	0.0436049	0.715374	0.424058	0.343829	ENSRNOG00000018317	AP2 associated kinase 1(Aak1)
Aamdc	0.486841	0.390049	0.590294	-0.345477	0.999979	-0.0344337	0.972282	0.0143954	0.927098	0.0398757	ENSRNOG00000012584	adipogenesis associated, Mth938 domain containing(Aamdc)
Aamp	0.00870077	0.246182	0.999876	0.000197165	0.999979	-0.103779	0.000885563	-0.222313	0.126359	-0.117951	ENSRNOG00000014399	angio-associated, migratory cell protein(Aamp)
Aar2	0.739718	-0.0510916	0.797469	0.0964556	0.395807	0.284613	0.387818	0.145048	0.446354	-0.137704	ENSRNOG00000020086	AAR2 splicing factor homolog(Aar2)
Aars	0.911671	-0.0205051	0.152469	0.277364	0.156061	0.40523	2.81488e-06	0.59207	0.216815	0.192615	ENSRNOG00000018404	alanyl-tRNA synthetase(Aars)
Aars2	0.377213	-0.244621	0.395608	0.349888	0.999979	0.309795	0.854922	0.0585144	0.53867	-0.186237	ENSRNOG00000025808	alanyl-tRNA synthetase 2, mitochondrial(Aars2)
Aarsd1	0.000438907	-0.346019	0.70725	-0.125828	0.999979	-0.0554248	0.0259981	-0.326192	0.0641375	-0.291693	ENSRNOG00000020658	alanyl-tRNA synthetase domain containing 1(Aarsd1)
Aasdh	0.0842834	0.331944	0.861037	0.0796264	0.999979	0.073682	0.387528	0.155448	0.634181	0.0982298	ENSRNOG00000002137	aminoadipate-semialdehyde dehydrogenase(Aasdh)
Aasdhppt	0.0108666	-0.285614	0.580912	-0.104067	0.999979	0.0595259	0.134991	-0.146349	0.0216903	-0.224469	ENSRNOG00000005795	aminoadipate-semialdehyde dehydrogenase-phosphopantetheinyl transferase(Aasdhppt)
Aatf	1.25522e-05	-0.398626	0.787066	-0.0952947	0.999979	-0.0944376	0.000638573	-0.459771	0.012491	-0.36531	ENSRNOG00000002778	apoptosis antagonizing transcription factor(Aatf)
Abat	0.552306	-0.339114	0.588606	-0.450961	0.999979	0.26469	0.0892741	-0.722248	0.0177851	-1.0517	ENSRNOG00000002636	4-aminobutyrate aminotransferase(Abat)
Abca2	0.139551	0.344488	0.785869	0.22316	0.999979	0.189365	0.232653	-0.427297	0.0950289	-0.60294	ENSRNOG00000014268	ATP binding cassette subfamily A member 2(Abca2)
Abca3	0.00195961	0.674873	0.0750655	0.491192	0.999979	0.0133153	0.680231	0.108252	0.745797	0.0929761	ENSRNOG00000050057	ATP binding cassette subfamily A member 3(Abca3)
Abca7	0.644212	0.0904095	0.634799	-0.199362	0.976405	-0.33079	0.0340094	-0.417374	0.594725	-0.132128	ENSRNOG00000012939	ATP binding cassette subfamily A member 7(Abca7)
Abcb10	0.305103	-0.375157	0.712368	-0.217236	0.722461	-0.454821	0.0196117	-0.602014	0.692975	-0.133404	ENSRNOG00000017993	ATP binding cassette subfamily B member 10(Abcb10)
Abcb11	na	-0.326191	0.175785	-1.86935	0.999979	0.212096	0.653995	0.456031	0.701402	0.417662	ENSRNOG00000050860	ATP binding cassette subfamily B member 11(Abcb11)
Abcb4	0.654314	-0.096176	0.00495838	-0.744184	0.999979	-0.172551	0.612671	0.14547	0.291734	0.286826	ENSRNOG00000008012	ATP binding cassette subfamily B member 1A(Abcb1a)
Abcb6	0.00191953	-0.569254	0.938903	0.162874	0.999979	0.338684	0.390758	-0.583562	0.141123	-0.98217	ENSRNOG00000018697	ATP-binding cassette, subfamily B (MDR/TAP), member 6(Abcb6)
Abcb7	0.906696	0.0210805	0.365632	-0.301564	0.999979	0.202032	0.125976	-0.318145	0.00783942	-0.543106	ENSRNOG00000002790	ATP binding cassette subfamily B member 7(Abcb7)
Abcb8	0.206669	-0.270362	0.96393	0.0447729	0.999979	-0.0123806	0.834355	-0.0659257	0.889042	-0.0472208	ENSRNOG00000008557	ATP binding cassette subfamily B member 8(Abcb8)
Abcc1	0.934765	0.0177945	0.178762	0.288453	0.999979	0.11558	5.19864e-06	0.618095	0.000150277	0.548773	ENSRNOG00000022305	ATP binding cassette subfamily C member 1(Abcc1)
Abcc10	0.973611	-0.0231731	0.825626	0.30885	0.805829	-1.06058	0.918696	-0.0731511	0.171078	0.798618	ENSRNOG00000018863	ATP binding cassette subfamily C member 10(Abcc10)
Abcc4	0.98195	-0.0102825	0.676455	0.380282	0.842176	0.476878	0.996448	0.00251461	0.334958	-0.475103	ENSRNOG00000010064	ATP binding cassette subfamily C member 4(Abcc4)
Abcc5	0.0462198	0.313776	0.992795	0.0106013	0.999979	-0.208355	0.874317	-0.0418188	0.548476	0.148134	ENSRNOG00000029178	ATP binding cassette subfamily C member 5(Abcc5)
Abcd1	0.0299725	0.427478	0.83317	0.1146	0.999979	-0.332934	0.0149249	-0.495826	0.663707	-0.116406	ENSRNOG00000056524	ATP binding cassette subfamily D member 1(Abcd1)
Abcd3	0.0112161	-0.499346	0.503783	-0.245122	0.935343	-0.34805	0.0353322	-0.410686	0.989023	-0.00414442	ENSRNOG00000011929	ATP binding cassette subfamily D member 3(Abcd3)
Abcd4	0.906498	0.0487207	0.657889	0.241062	0.999979	0.0681577	0.817628	0.0772202	0.812182	0.0839282	ENSRNOG00000011964	ATP binding cassette subfamily D member 4(Abcd4)
Abce1	0.00121282	-0.265543	0.557324	-0.201521	0.999979	0.0757677	0.0289372	-0.378585	0.00428085	-0.503315	ENSRNOG00000018345	ATP binding cassette subfamily E member 1(Abce1)
Abcf1	0.0966191	-0.167034	0.664191	0.0979652	0.999979	-0.00411922	0.967767	-0.00573241	0.99479	-0.00106969	ENSRNOG00000000799	ATP binding cassette subfamily F member 1(Abcf1)
Abcf2	0.0855978	-0.171938	0.941717	0.0389204	0.999979	0.0272395	0.217217	-0.198259	0.163842	-0.231827	ENSRNOG00000010609	ATP binding cassette subfamily F member 2(Abcf2)
Abcf3	0.012002	0.230395	0.728424	0.0645114	0.999979	0.0122189	0.0876097	0.140281	0.163626	0.123792	ENSRNOG00000001710	ATP binding cassette subfamily F member 3(Abcf3)
Abcg1	0.102775	0.222072	0.978911	0.0277092	0.999979	-0.186976	0.0174091	0.500522	0.00100384	0.698413	ENSRNOG00000001158	ATP binding cassette subfamily G member 1(Abcg1)
Abcg2	0.447309	0.30382	0.0240911	-0.843095	0.999979	0.181651	0.00361084	-0.872727	3.63373e-05	-1.28353	ENSRNOG00000007041	ATP-binding cassette, subfamily G (WHITE), member 2(Abcg2)
Abcg3l1	0.0251359	0.574426	0.124517	0.546252	0.00168595	0.929908	0.0122092	0.634373	0.325689	-0.304927	ENSRNOG00000030216	ATP-binding cassette, subfamily G (WHITE), member 3-like 1(Abcg3l1)
Abcg3l3	na	na	0.244072	0.889946	0.281526	1.21603	0.378241	0.503035	0.320111	-0.66419	ENSRNOG00000039890	ATP-binding cassette, subfamily G (WHITE), member 3-like 3(Abcg3l3)
Abhd1	0.380856	0.189532	0.939546	0.0335595	0.999979	-0.107152	0.1554	0.183043	0.0216903	0.291549	ENSRNOG00000025689	abhydrolase domain containing 1(Abhd1)
Abhd10	0.849988	-0.0792949	0.842616	0.154795	0.648768	0.428273	0.0513956	0.55595	0.684684	0.153349	ENSRNOG00000054334	abhydrolase domain containing 10(Abhd10)
Abhd11	0.0465998	-0.307177	0.394804	-0.173212	0.829142	-0.217836	4.90579e-05	-0.451625	0.0726859	-0.229087	ENSRNOG00000018910	abhydrolase domain containing 11(Abhd11)
Abhd12	0.840201	0.0510508	0.673754	0.14072	0.918613	0.225674	0.781582	0.054915	0.389056	-0.157296	ENSRNOG00000036934	abhydrolase domain containing 12(Abhd12)
Abhd13	0.00709664	0.408673	0.7109	0.193809	0.999979	0.0524677	0.109057	0.379681	0.251602	0.299914	ENSRNOG00000014598	abhydrolase domain containing 13(Abhd13)
Abhd14a	0.419966	0.181567	0.878035	-0.0812639	0.888784	-0.249155	0.0453727	-0.366689	0.629081	-0.112652	ENSRNOG00000011936	abhydrolase domain containing 14A(Abhd14a)
Abhd14b	0.998652	-0.00143226	0.965605	0.0724865	0.999979	0.0593453	0.00177764	-1.2851	0.00266664	-1.34143	ENSRNOG00000012073	abhydrolase domain containing 14b(Abhd14b)
Abhd15	1.79631e-10	0.797971	0.766112	0.129989	0.999979	-0.120068	0.599906	0.115246	0.173852	0.273781	ENSRNOG00000015002	abhydrolase domain containing 15(Abhd15)
Abhd16a	0.0524105	0.302007	2.18648e-07	0.862547	0.657516	0.574313	9.29515e-12	1.05602	0.00784667	0.47455	ENSRNOG00000056637	abhydrolase domain containing 16A(Abhd16a)
Abhd17a	0.853395	0.0880051	0.98662	-0.0283287	0.888866	-0.418675	0.935093	-0.0309528	0.259585	0.362762	ENSRNOG00000018212	abhydrolase domain containing 17A(Abhd17a)
Abhd17b	0.589443	-0.188167	0.475233	0.321449	0.999979	0.0509538	0.00664343	0.637132	0.0194486	0.588938	ENSRNOG00000012514	abhydrolase domain containing 17B(Abhd17b)
Abhd17c	0.00583568	0.460741	0.250784	-0.335465	0.999979	-0.226888	0.0352043	-0.400291	0.615726	-0.121574	ENSRNOG00000012683	abhydrolase domain containing 17C(Abhd17c)
Abhd18	0.0085016	0.645841	0.873611	0.108976	0.999979	0.168371	0.013537	0.566819	0.0673099	0.458478	ENSRNOG00000013692	abhydrolase domain containing 18(Abhd18)
Abhd2	0.896406	0.0500653	0.456524	0.343057	0.752368	0.492975	1.15988e-08	1.28481	0.000845686	0.837778	ENSRNOG00000017120	abhydrolase domain containing 2(Abhd2)
Abhd3	na	na	0.44687	-1.5334	0.999979	-0.957024	0.178548	-1.59731	0.465105	-0.96689	ENSRNOG00000029370	abhydrolase domain containing 3(Abhd3)
Abhd4	0.882798	-0.0239865	0.841071	0.0964205	0.999979	-0.0168372	0.378157	0.176904	0.310067	0.210138	ENSRNOG00000009244	abhydrolase domain containing 4(Abhd4)
Abhd5	0.00934088	-0.294068	0.337397	-0.199888	0.999979	0.0191312	0.20789	-0.171305	0.101564	-0.226398	ENSRNOG00000000221	abhydrolase domain containing 5(Abhd5)
Abhd6	0.000688982	0.378915	0.795135	0.102481	0.951184	0.183605	0.0559746	0.303036	0.563089	0.113903	ENSRNOG00000008167	abhydrolase domain containing 6(Abhd6)
Abhd8	0.732719	0.101302	0.78172	0.165704	0.999979	-0.144085	0.103853	-0.411313	0.330508	-0.277228	ENSRNOG00000000054	abhydrolase domain containing 8(Abhd8)
Abi1	0.00120219	0.323094	0.785931	-0.0973445	0.999979	0.0631297	0.136326	-0.225188	0.0702886	-0.279546	ENSRNOG00000031325	abl-interactor 1(Abi1)
Abi2	0.197113	-0.493366	0.98919	-0.0382331	0.999979	0.0406218	0.163493	-0.640444	0.113578	-0.759236	ENSRNOG00000017707	abl-interactor 2(Abi2)
Abi3	0.0164678	-0.304482	0.745393	-0.0941978	0.999979	-0.034901	6.72418e-07	-0.563893	1.797e-05	-0.517513	ENSRNOG00000005575	ABI family, member 3(Abi3)
Abitram	0.17871	-0.320777	0.98919	-0.0145856	0.999979	-0.0273424	0.377876	0.165138	0.308364	0.197598	ENSRNOG00000010532	family with sequence similarity 206, member A(Fam206a)
Abl2	0.553583	-0.40307	0.571208	0.58088	0.999979	-0.0549513	0.332629	0.550694	0.50368	0.423079	ENSRNOG00000004305	ABL proto-oncogene 2, non-receptor tyrosine kinase(Abl2)
Abr	4.07277e-05	0.650256	0.255571	0.400381	0.999979	0.310536	0.0125712	0.556504	0.271542	0.288873	ENSRNOG00000056837	active BCR-related(Abr)
Abracl	0.0155683	-0.196574	0.593247	-0.114502	0.999979	0.0528449	1.28993e-08	-0.54256	4.76397e-09	-0.582218	ENSRNOG00000051450	ABRA C-terminal like(Abracl)
Abraxas1	0.513473	-0.112033	0.811443	-0.124747	0.999979	-0.170564	0.203032	-0.277847	0.822878	-0.0639477	ENSRNOG00000002165	family with sequence similarity 175, member A(Fam175a)
Abraxas2	0.290984	0.135288	0.932817	0.0334916	0.317749	0.353226	0.00393052	0.316743	0.774203	-0.0450661	ENSRNOG00000017222	family with sequence similarity 175, member B(Fam175b)
Abt1	0.131679	-0.197399	0.970451	0.0219279	0.999979	0.10061	0.97646	0.00540942	0.587843	-0.0908596	ENSRNOG00000017585	activator of basal transcription 1(Abt1)
Abtb1	2.84126e-07	0.697094	0.966461	0.0296464	0.999979	-0.220842	0.504443	0.128621	0.0981757	0.294418	ENSRNOG00000015762	ankyrin repeat and BTB domain containing 1(Abtb1)
Abtb2	0.292579	0.337459	0.0634172	0.672694	0.999979	0.104429	2.47086e-05	1.09946	0.000118734	1.06067	ENSRNOG00000008510	ankyrin repeat and BTB domain containing 2(Abtb2)
AC094053,1	0.215537	-0.402436	0.69062	0.195361	0.999979	-0.0584296	0.925578	-0.0276697	0.890985	0.0431168	ENSRNOG00000030704	-
AC094212,1	0.361003	-0.426439	0.207413	-0.83721	0.999979	-0.078738	0.234381	-0.561512	0.385318	-0.452185	ENSRNOG00000055222	triosephosphate isomerase(LOC500959)
AC094217,1	0.0310111	-0.277105	0.798243	-0.106407	0.999979	-0.127347	0.647963	-0.0926376	0.913259	0.02576	ENSRNOG00000039783	-
AC094643,2	0.705194	0.356431	0.870644	-0.225874	0.999979	-0.121629	0.360869	-0.495739	0.565693	-0.348909	ENSRNOG00000053040	-
AC095078,1	0.570409	0.269506	0.932164	-0.0802975	0.999979	-0.0187885	0.148831	0.396372	0.0898437	0.478244	ENSRNOG00000058506	-
AC095278,1	na	-0.44139	0.959134	-0.141302	0.999979	0.400377	0.717311	-0.315936	0.46069	-0.639451	ENSRNOG00000020749	-
AC095947,1	1.73668e-05	-0.827514	0.233338	-0.340943	0.999979	-0.199915	9.64736e-06	-0.783082	0.00124639	-0.621119	ENSRNOG00000030291	-
AC095947,4	0.910378	-0.0866414	0.915083	0.147798	0.999979	-0.32635	0.495702	-0.347355	0.881502	0.0902731	ENSRNOG00000051079	-
AC096601,1	na	na	0.97974	0.112285	0.999979	0.321769	0.331548	0.970738	0.477753	0.792077	ENSRNOG00000024177	-
AC097784,1	0.924831	0.0300357	0.949392	-0.0374137	0.999979	0.096541	0.00388165	0.423295	0.034723	0.339045	ENSRNOG00000056374	similar to Zinc finger protein 180 (HHZ168)(LOC691280)
AC098008,1	0.181436	-1.11458	0.763304	-0.545439	0.793888	-1.08911	0.216111	-1.02401	0.923687	-0.100464	ENSRNOG00000018503	-
AC098125,3	0.684706	-0.190272	0.907961	-0.107532	0.999979	0.108638	0.108899	-0.489266	0.0658125	-0.586364	ENSRNOG00000055683	-
AC098459,1	0.000688982	-0.575877	0.826287	-0.134929	0.999979	-0.290041	6.19487e-07	-1.09049	0.00186759	-0.741118	ENSRNOG00000022738	-
AC098459,2	na	na	0.980567	0.142186	0.999979	-0.324759	0.98843	-0.0258033	0.676573	0.653879	ENSRNOG00000053343	-
AC098547,1	0.770299	-0.085561	0.351406	-0.311031	0.999979	0.135518	0.0823255	0.357292	0.395615	0.203137	ENSRNOG00000045877	-
AC098547,2	na	1.51159	0.927976	0.228688	0.999979	0.193649	0.631186	-0.440455	0.517135	-0.604781	ENSRNOG00000061936	-
AC098622,1	0.675497	-0.421485	0.822797	-0.3362	0.999979	-0.340789	0.424038	-0.522566	0.84216	-0.16007	ENSRNOG00000021123	-
AC099294,1	0.895322	-0.0927115	0.56891	0.379209	0.999979	-0.167456	0.306057	0.373939	0.118993	0.561556	ENSRNOG00000029315	-
AC099384,2	0.567917	0.335732	0.178979	0.617336	0.648768	0.603766	0.00011642	1.11329	0.110057	0.554715	ENSRNOG00000056621	-
AC099449,1	0.679323	0.345084	0.937931	0.113443	0.999979	-0.0170394	0.145921	0.606871	0.179404	0.600616	ENSRNOG00000056268	-
AC099450,1	0.310049	0.265464	0.573688	0.262644	0.904285	0.314393	0.648951	-0.132081	0.118405	-0.406577	ENSRNOG00000020618	ribosomal protein L13A(Rpl13a)
AC099453,1	0.614631	-0.143255	0.885953	-0.0970145	0.999979	-0.168036	0.849784	0.0558419	0.488216	0.189702	ENSRNOG00000033024	-
AC103024,2	0.146055	-0.688048	0.840454	0.196585	0.999979	-0.144977	0.402545	0.336664	0.291374	0.435621	ENSRNOG00000050786	-
AC103221,1	0.875226	-0.109094	0.703309	0.309921	0.999979	-0.279979	0.865121	0.0814736	0.368138	0.380816	ENSRNOG00000017330	-
AC105531,1	0.0100161	0.399221	0.834055	-0.0897344	0.980074	-0.287412	0.713175	0.074289	0.0224763	0.376315	ENSRNOG00000053814	-
AC105662,1	0.9757	-0.0227582	0.976264	0.0582564	0.982308	-0.366703	0.944726	0.0375539	0.478073	0.349699	ENSRNOG00000030447	-
AC105662,3	0.769618	-0.151544	0.749243	0.257022	0.999979	0.0326436	0.743481	0.141612	0.843831	0.0949571	ENSRNOG00000060851	-
AC106605,1	na	na	0.911276	0.218344	0.999979	-0.275875	0.283703	0.689663	0.0938512	1.05076	ENSRNOG00000047302	-
AC106663,1	na	-1.05798	0.925306	0.214211	0.999979	0.57418	0.738906	-0.291709	0.413329	-0.703323	ENSRNOG00000055372	-
AC108595,1	0.983378	0.0225567	0.962161	0.09369	0.999979	-0.155938	0.547587	-0.350709	0.826536	-0.150168	ENSRNOG00000032420	-
AC109037,1	0.776895	-0.281029	0.727588	-0.469348	0.999979	-0.283412	0.510884	-0.438451	0.764762	-0.233165	ENSRNOG00000043100	-
AC109048,1	0.236844	-0.234278	0.910293	0.0755068	0.999979	-0.0405928	0.306927	-0.237796	0.438407	-0.197257	ENSRNOG00000018801	-
AC109096,1	na	na	0.825234	-0.401846	0.999979	-0.18838	0.729138	-0.299757	0.990223	-0.0125172	ENSRNOG00000046560	-
AC109100,1	na	0.633125	0.758756	-0.84721	0.999979	-0.754246	0.487676	-0.933615	0.954339	-0.0983674	ENSRNOG00000036384	-
AC109542,1	0.897606	-0.202723	0.419339	-2.73655	0.999979	0.494756	0.876146	0.399316	0.307284	-2.30429	ENSRNOG00000048562	-
AC109737,1	0.0730201	0.170424	0.945421	-0.0285344	0.999659	-0.156471	0.678578	0.0598024	0.098046	0.207203	ENSRNOG00000014312	-
AC109942,1	0.92162	-0.048211	0.729252	0.213111	0.912772	0.34464	0.0592177	0.497112	0.694487	0.1377	ENSRNOG00000029416	-
AC109958,1	0.609007	0.0792653	0.799933	0.0632907	0.999979	0.126012	0.0426994	0.199252	0.500978	0.081461	ENSRNOG00000021960	-
AC111287,1	0.620711	0.502653	0.885456	-0.2982	0.999979	-0.250182	0.0705494	-1.34182	0.204059	-1.02536	ENSRNOG00000059841	-
AC111319,2	0.107573	-0.626056	0.651019	-0.305425	0.999979	-0.260956	0.764364	-0.119306	0.953358	0.0269709	ENSRNOG00000058926	-
AC111831,2	0.681009	-0.21798	0.954062	-0.0677586	0.999979	-0.0617487	0.334421	-0.31997	0.460968	-0.271202	ENSRNOG00000060905	-
AC112568,1	0.128305	1.1643	0.00535373	1.87826	0.762547	0.992754	0.0774961	1.10503	0.99479	-0.00645254	ENSRNOG00000000767	-
AC112866,1	na	na	0.99878	0.0124678	0.999979	0.402485	0.715878	0.290574	0.889053	-0.130328	ENSRNOG00000048424	-
AC113837,9	0.467988	0.421641	0.877955	0.190601	0.999979	-0.0909714	0.648287	0.236931	0.460948	0.376213	ENSRNOG00000061854	-
AC114233,1	na	na	0.930799	0.298966	0.999979	-0.702882	0.000763979	2.79408	4.94083e-05	3.42634	ENSRNOG00000051046	-
AC114446,1	0.0028761	1.71807	0.938011	-0.142872	0.996137	-0.675337	0.517565	-0.398282	0.813958	0.169324	ENSRNOG00000059545	-
AC114460,1	0.378287	-0.474302	0.435281	0.453448	0.440355	0.591273	0.0992578	0.551827	0.96348	-0.0238664	ENSRNOG00000025003	-
AC116220,1	0.591621	-0.293489	0.756686	-0.38159	0.999979	-0.330306	0.208292	-0.692037	0.512924	-0.411375	ENSRNOG00000016854	leucine rich repeat containing 36(Lrrc36)
AC117058,1	0.670736	-0.258201	0.939719	-0.0931206	0.580769	-0.586962	0.324756	-0.382409	0.703549	0.17094	ENSRNOG00000045729	-
AC117101,1	0.969914	-0.0456961	0.979388	0.0610089	0.752368	-0.739386	0.987159	0.0114936	0.144891	0.78516	ENSRNOG00000013292	-
AC117330,1	0.826648	-0.111219	0.72544	0.225951	0.999979	0.0110523	0.351823	0.285734	0.470864	0.243599	ENSRNOG00000018925	-
AC117869,1	0.189121	-0.253166	0.845593	-0.0876237	0.999979	0.0529463	0.900066	-0.0277684	0.716847	-0.0797073	ENSRNOG00000031439	-
AC117889,1	0.715902	-0.244131	0.587246	0.330959	0.999979	0.199285	0.00170681	0.876472	0.0280964	0.676269	ENSRNOG00000053079	-
AC118165,1	0.720592	0.134041	0.693684	0.22046	0.999979	0.194095	0.920374	0.0337194	0.567422	-0.182778	ENSRNOG00000032625	-
AC118490,1	na	na	0.891654	-0.240538	0.999979	-0.137789	0.374755	-0.581804	0.745061	-0.253319	ENSRNOG00000010101	-
AC118772,2	0.745063	0.233443	0.284648	-0.703966	0.544731	0.69938	0.0100645	0.969927	0.677305	0.217284	ENSRNOG00000021357	-
AC118772,3	0.997943	-0.00182484	0.875424	-0.142919	0.999979	-0.0826331	0.00307628	0.830249	0.00141767	0.933324	ENSRNOG00000052330	-
AC119015,1	0.0323872	-0.676584	0.809526	-0.243242	0.594529	-0.614902	0.23616	-0.50464	0.993489	0.0049279	ENSRNOG00000027511	-
AC119762,4	na	na	0.556104	0.680568	0.999979	0.241858	0.492403	0.468795	0.836613	0.177078	ENSRNOG00000058654	mex-3 RNA binding family member A(Mex3a)
AC119762,6	0.804926	0.242205	0.7109	-0.592281	0.888784	0.808667	0.72982	-0.306144	0.176296	-1.1479	ENSRNOG00000062009	-
AC119762,8	0.0946762	-0.870208	0.491839	-0.676504	0.999979	-0.070079	0.0116954	-1.35749	0.0377633	-1.20418	ENSRNOG00000062168	-
AC120310,1	0.17871	-0.302147	0.936318	0.0476259	0.999979	0.0263522	0.399139	-0.163249	0.278554	-0.215241	ENSRNOG00000055942	-
AC120486,11	0.00340389	0.895244	0.977337	-0.0490289	0.999979	-0.420292	0.549312	0.252638	0.0774036	0.666785	ENSRNOG00000059825	-
AC120486,8	0.107257	1.02834	0.906469	-0.189576	0.650812	-0.942876	0.603615	-0.319272	0.298891	0.59094	ENSRNOG00000057666	-
AC120486,9	0.602254	0.435686	0.826004	0.279035	0.987169	0.520675	0.0357262	0.98294	0.659915	0.276428	ENSRNOG00000058238	-
AC121209,1	na	-0.607287	0.840661	0.344757	0.971867	-0.637507	0.761633	0.246605	0.192643	0.894772	ENSRNOG00000036588	-
AC123346,1	0.172795	1.04383	0.721843	0.44517	0.999979	-0.383938	0.90651	0.0868285	0.61276	0.350247	ENSRNOG00000053448	-
AC123471,1	0.389173	-0.535448	0.740834	0.292591	0.999979	0.0459735	0.395422	0.355975	0.470804	0.328915	ENSRNOG00000018377	-
AC123494,1	na	na	0.609564	0.652494	0.999979	-0.0554725	0.161286	0.895598	0.147909	0.972437	ENSRNOG00000024795	-
AC124205,1	0.674858	0.323644	0.945037	0.0941266	0.999979	0.105329	0.203182	0.492686	0.370352	0.38919	ENSRNOG00000012595	-
AC125920,1	0.997484	-0.00210484	0.998999	-0.00472432	0.999979	0.145672	0.527015	0.233016	0.957334	0.0257121	ENSRNOG00000051278	-
AC125982,1	na	na	0.899873	0.307054	0.999979	-0.394623	0.642343	0.436252	0.312788	0.886471	ENSRNOG00000045580	-
AC126482,2	0.809469	-0.237008	0.811443	0.289413	0.996511	0.385089	0.554019	0.3276	0.984879	-0.0151094	ENSRNOG00000061945	-
AC126486,2	0.816126	0.177241	0.95223	0.104914	0.999979	0.00397136	0.735816	-0.196898	0.790975	-0.168953	ENSRNOG00000061937	-
AC126486,4	na	na	0.897363	0.281819	0.999979	0.0393366	0.926571	-0.0879816	0.953758	-0.0625022	ENSRNOG00000061964	-
AC126572,1	0.0503446	0.505467	0.907961	0.283429	0.999979	0.243397	0.811366	0.242265	0.98192	-0.0288266	ENSRNOG00000006958	zinc finger protein 12(Zfp12)
AC126641,1	2.23731e-31	1.43011	0.428416	-0.301339	0.999979	-0.0457722	1.38526e-07	-1.0369	1.326e-05	-0.912674	ENSRNOG00000011160	-
AC127076,2	0.928016	-0.0862721	0.715967	0.365515	0.999979	-0.29772	0.617918	0.266213	0.314857	0.507474	ENSRNOG00000059601	-
AC127084,2	na	1.47322	0.558969	-1.01658	0.999979	0.058973	0.978745	-0.0309181	0.967879	0.0539925	ENSRNOG00000026797	-
AC127084,5	0.0051701	-0.435926	0.166848	-0.565967	0.999979	-0.245436	0.0682314	-0.532175	0.482079	-0.245772	ENSRNOG00000051303	-
AC127920,1	4.70564e-05	-0.559498	0.731906	-0.155516	0.999979	-0.2197	0.000330848	-0.665219	0.0315233	-0.442007	ENSRNOG00000008664	-
AC128207,1	na	na	0.769625	-0.53138	0.799834	0.929241	0.978128	-0.0267367	0.300995	-0.921338	ENSRNOG00000028837	-
AC128207,2	na	na	0.873611	0.317601	0.999979	-0.0210337	0.608761	0.420693	0.711504	0.336999	ENSRNOG00000043026	-
AC128212,1	0.48613	0.584758	0.93887	-0.144967	0.999979	0.050939	0.182088	-0.776506	0.19713	-0.803874	ENSRNOG00000054355	-
AC128836,1	na	na	0.46013	0.854818	0.582006	0.928498	0.0653868	1.17368	0.763712	0.277288	ENSRNOG00000055411	-
AC128859,1	na	na	0.932763	0.203226	0.999979	-0.361441	0.39057	0.650728	0.358566	0.727809	ENSRNOG00000014534	-
AC128859,2	na	na	0.97649	0.0987835	0.999979	-0.232307	0.0095689	1.6084	0.00877837	1.71048	ENSRNOG00000037114	-
AC128859,3	0.0489972	0.380112	2.61353e-31	1.81873	7.11952e-14	2.07078	5.71336e-43	2.10811	0.862088	0.0450797	ENSRNOG00000048053	-
AC128859,6	na	na	0.86521	0.317383	0.370138	1.25989	0.0502838	1.23465	0.991426	0.0107939	ENSRNOG00000057143	-
AC128960,1	0.000776777	-0.342604	0.725138	-0.120772	0.999979	-0.0750049	0.324775	-0.162647	0.669606	-0.0831333	ENSRNOG00000038045	-
AC128962,1	0.780188	0.14507	2.53242e-06	1.20139	0.0206856	1.63357	9.60697e-14	1.69569	0.899361	0.0498515	ENSRNOG00000061991	-
AC129365,1	0.505157	-0.411229	0.990665	-0.0288931	0.999979	-0.104336	0.00309694	-1.21536	0.0269119	-0.974369	ENSRNOG00000061358	-
AC130232,1	0.493558	-0.213506	0.915282	0.0745811	0.643914	0.388445	0.0829361	0.375735	0.902962	-0.0381352	ENSRNOG00000039505	-
AC130232,2	0.372372	0.195203	0.685004	0.125335	0.999979	0.0190061	0.0170328	0.321656	0.0305749	0.311519	ENSRNOG00000060701	-
AC130391,3	0.387071	0.618761	0.638948	0.454605	0.999979	0.440066	0.0782915	0.811507	0.569534	0.326397	ENSRNOG00000053025	-
AC130970,1	0.962414	0.0303978	0.934979	0.111076	0.999979	-0.417666	0.461128	-0.331702	0.893882	0.0730133	ENSRNOG00000042445	-
AC132539,1	na	na	0.24674	-1.72502	0.108486	-2.82014	0.0148941	-2.46016	0.852133	-0.231558	ENSRNOG00000007803	-
AC133403,1	0.114705	0.573511	0.598147	-0.342021	0.999979	-0.160416	0.0844937	-0.56218	0.274525	-0.398428	ENSRNOG00000046836	-
AC134224,1	0.163721	0.540606	0.487659	0.372539	0.999979	-0.036264	0.105121	0.486833	0.135608	0.476125	ENSRNOG00000062127	-
AC134224,2	0.570112	0.301529	0.77656	0.202469	0.999979	-0.192106	0.229822	0.368652	0.0854751	0.526837	ENSRNOG00000062155	-
AC134224,3	0.139849	0.404853	0.875387	0.179761	0.999979	4.42669e-05	0.157052	0.588292	0.0950289	0.71139	ENSRNOG00000062158	-
AC135826,1	na	na	0.978951	0.0926098	0.999979	0.481071	0.350264	-0.802133	0.190053	-1.18153	ENSRNOG00000033693	-
AC136588,2	0.741404	-0.333711	0.809526	0.2839	0.999979	0.325086	0.118544	0.714803	0.486717	0.385782	ENSRNOG00000030988	-
AC136588,3	0.897606	-0.071034	0.261882	-0.62348	0.999979	-0.245576	0.00155419	-1.10985	0.0188931	-0.887196	ENSRNOG00000056767	-
AC140988,1	0.213494	-0.376478	0.549599	-0.291294	0.999979	-0.161272	0.0731256	-0.453098	0.380319	-0.25723	ENSRNOG00000032900	-
AC141169,5	0.644212	0.329914	0.589071	-0.549247	0.999979	-0.125683	0.97178	0.023605	0.66529	0.272583	ENSRNOG00000059041	-
AC141220,2	0.275894	-0.508691	0.980707	0.0347791	0.999979	0.111951	0.425322	-0.277923	0.294129	-0.377929	ENSRNOG00000062021	-
AC141220,3	0.84199	0.0897594	0.992795	-0.0153529	0.999979	0.0321871	0.548988	0.189685	0.557506	0.19674	ENSRNOG00000062038	-
AC141344,1	na	na	0.990614	0.0477924	0.999979	-0.205349	0.61449	-0.396489	0.956518	-0.0527034	ENSRNOG00000054578	-
AC141377,1	0.332894	0.72292	0.830338	-0.292429	0.999979	0.13573	0.823434	-0.15163	0.821011	-0.165056	ENSRNOG00000051189	-
AC141489,1	0.997986	0.00210253	0.439184	-0.502285	0.999979	-0.044019	0.472578	-0.292005	0.607283	-0.232935	ENSRNOG00000033916	-
AC141521,1	0.8779	0.0532851	0.947053	-0.0533961	0.999979	0.0254869	0.474396	-0.180188	0.470804	-0.1925	ENSRNOG00000053147	-
AC142154,1	0.430388	0.734897	0.940657	0.154307	0.80499	-0.788403	0.698346	-0.287	0.623649	0.359776	ENSRNOG00000050758	-
AC142180,1	na	na	0.659145	0.7389	0.999979	-0.347917	0.582979	0.513969	0.39839	0.776082	ENSRNOG00000043262	-
AC142181,1	0.0821638	0.168587	0.811286	-0.0651093	0.999979	-0.0797336	0.831712	0.0297841	0.380685	0.11032	ENSRNOG00000033815	-
AC144674,1	0.752714	0.277343	0.930799	0.276207	0.999979	0.553555	0.650416	0.510523	0.977524	0.0430657	ENSRNOG00000051248	-
AC239701,1	0.65257	0.174324	0.601253	0.247867	0.999979	0.186459	0.5835	0.151566	0.884885	-0.0475108	ENSRNOG00000060437	mediator of RNA polymerase II transcription subunit 14-like(LOC103694537)
AC239701,4	na	-0.371024	0.82011	0.377855	0.888784	0.650178	0.302449	0.709706	0.900725	0.115228	ENSRNOG00000062152	-
AC241873,1	0.0328838	0.35535	0.689287	-0.134301	0.834328	0.274443	1.74101e-06	0.656138	0.00892366	0.401196	ENSRNOG00000060617	lysine demethylase 6A(Kdm6a)
AC242953,1	na	na	0.910183	0.219533	0.999979	0.294379	0.422248	0.536648	0.769666	0.242831	ENSRNOG00000062115	-
Acaa1a	0.910584	0.0233208	0.999876	-0.000732727	0.999979	-0.11023	0.000346764	-0.407989	0.0158723	-0.301524	ENSRNOG00000032908	acetyl-CoA acyltransferase 1(Acaa1a)
Acaa2	0.0869034	-0.194073	7.52874e-06	-0.564892	0.591223	-0.340205	1.4454e-13	-0.842429	6.08803e-05	-0.502009	ENSRNOG00000013766	acetyl-CoA acyltransferase 2(Acaa2)
Acaca	0.838493	0.0695819	0.811334	0.126132	0.999979	-0.211618	0.411264	-0.19271	0.98861	0.00455632	ENSRNOG00000034013	acetyl-CoA carboxylase alpha(Acaca)
Acacb	na	na	0.432839	0.987084	0.999979	-0.239343	0.0782246	1.25819	0.0400412	1.49819	ENSRNOG00000000658	acetyl-CoA carboxylase beta(Acacb)
Acad10	0.0855973	0.431366	0.968908	-0.0601662	0.999979	0.333258	0.652697	-0.197269	0.379798	-0.370679	ENSRNOG00000037815	acyl-CoA dehydrogenase family, member 10(Acad10)
Acad11	0.130121	-0.241753	0.75745	-0.101301	0.999979	-0.127713	0.0100173	-0.346817	0.135342	-0.226672	ENSRNOG00000010940	acyl-CoA dehydrogenase family, member 11(Acad11)
Acad8	0.214836	0.300987	0.918362	0.0619661	0.999979	0.0569466	0.858624	0.0432321	0.981338	0.00708052	ENSRNOG00000048164	-
Acad9	0.00144353	-0.322862	0.329546	-0.199171	0.999979	-0.0828241	2.6089e-05	-0.491613	0.000663356	-0.426174	ENSRNOG00000014178	acyl-CoA dehydrogenase family, member 9(Acad9)
Acadl	0.230424	-0.197837	0.428477	-0.173551	0.999979	0.00228456	0.571299	-0.0842976	0.451406	-0.113674	ENSRNOG00000012966	acyl-CoA dehydrogenase, long chain(Acadl)
Acadm	0.317664	0.115676	0.188038	-0.257814	0.999979	-0.112627	7.36878e-06	-0.559051	0.00154152	-0.428496	ENSRNOG00000009845	acyl-CoA dehydrogenase, C-4 to C-12 straight chain(Acadm)
Acads	0.881272	0.0325893	0.803617	0.103467	0.999979	0.103177	0.544656	-0.117681	0.367999	-0.174434	ENSRNOG00000001177	acyl-CoA dehydrogenase, C-2 to C-3 short chain(Acads)
Acadsb	0.580087	0.125152	0.841071	0.101136	0.784173	0.328172	0.641226	-0.107163	0.0464709	-0.399638	ENSRNOG00000020624	acyl-CoA dehydrogenase, short/branched chain(Acadsb)
Acadvl	0.374665	-0.0930023	0.448015	-0.120157	0.999979	-0.0446127	0.827519	0.0255	0.502719	0.0727868	ENSRNOG00000018114	acyl-CoA dehydrogenase, very long chain(Acadvl)
Acap1	0.000364984	0.282625	0.978967	0.0137931	0.999979	-0.0478581	0.0117273	-0.271841	0.069362	-0.213875	ENSRNOG00000015674	ArfGAP with coiled-coil, ankyrin repeat and PH domains 1(Acap1)
Acap2	0.00119572	0.4424	0.804186	0.0760046	0.773629	0.210239	0.00182244	0.354918	0.26303	0.153899	ENSRNOG00000001730	ArfGAP with coiled-coil, ankyrin repeat and PH domains 2(Acap2)
Acap3	0.973094	0.017733	0.968242	0.0699932	0.999979	-0.335388	0.234846	-0.522754	0.961712	0.0297705	ENSRNOG00000022307	ArfGAP with coiled-coil, ankyrin repeat and PH domains 3(Acap3)
Acat1	4.38832e-06	-0.429307	0.184273	-0.198083	0.999979	-0.0188822	0.138194	-0.159514	0.220476	-0.142717	ENSRNOG00000007862	acetyl-CoA acetyltransferase 1(Acat1)
Acat2	0.823481	-0.033438	0.84667	-0.0799978	0.999979	-0.0176298	0.0137378	-0.367357	0.0259105	-0.352735	ENSRNOG00000019189	acetyl-CoA acetyltransferase 2(Acat2)
Acat2l1	0.416183	0.144088	0.991479	-0.00933678	0.999979	0.0234288	3.88054e-06	-0.606028	4.3996e-06	-0.635116	ENSRNOG00000013975	acetyl-CoA acetyltransferase 2-like 1(Acat2l1)
Acbd3	0.591666	0.103893	0.998089	-0.00430158	0.999979	-0.164593	0.175422	0.269183	0.0189154	0.455533	ENSRNOG00000003185	acyl-CoA binding domain containing 3(Acbd3)
Acbd4	0.223377	0.278338	0.874271	-0.0783404	0.981124	-0.252002	0.928	0.020364	0.152995	0.264538	ENSRNOG00000003108	acyl-CoA binding domain containing 4(Acbd4)
Acbd5	0.000435711	0.479109	0.137618	0.210981	0.867376	0.253603	5.26081e-05	0.38005	0.277589	0.128062	ENSRNOG00000017642	acyl-CoA binding domain containing 5(Acbd5)
Acbd6	0.156044	-0.228553	0.998999	0.0016849	0.999979	-0.0798144	0.330068	-0.15041	0.725968	-0.0652456	ENSRNOG00000003550	acyl-CoA binding domain containing 6(Acbd6)
Accs	0.915718	-0.0337785	0.955571	0.0531182	0.999659	-0.242826	0.0113157	-0.621528	0.157589	-0.391091	ENSRNOG00000009199	1-aminocyclopropane-1-carboxylate synthase homolog(Accs)
Acd	0.517754	0.0755121	0.98919	-0.00774713	0.999979	-0.0591132	0.00735305	-0.232525	0.0726735	-0.17169	ENSRNOG00000038973	adrenocortical dysplasia homolog(Acd)
Acer1	na	na	0.76063	-0.565716	0.731492	-1.20572	0.225082	-1.04035	0.992464	0.0107943	ENSRNOG00000047368	alkaline ceramidase 1(Acer1)
Acer3	0.736995	0.0514893	0.173404	-0.201771	0.999979	0.042125	0.0120963	-0.252582	0.00342839	-0.305163	ENSRNOG00000036866	alkaline ceramidase 3(Acer3)
Ache	0.502362	0.584844	0.757219	0.418334	0.675754	-1.19993	0.173912	-0.882222	0.591174	0.38678	ENSRNOG00000050841	acetylcholinesterase(Ache)
Acin1	0.518191	0.0780203	0.444313	0.190462	0.999979	0.109748	0.870256	0.0304719	0.73724	-0.0634894	ENSRNOG00000013533	apoptotic chromatin condensation inducer 1(Acin1)
Acly	0.114487	-0.264331	0.954843	-0.103269	0.999979	0.307808	0.772873	-0.177329	0.514893	-0.378715	ENSRNOG00000016924	ATP citrate lyase(Acly)
Aco1	0.247716	0.124975	0.277194	-0.412458	0.999979	-0.241848	3.01671e-11	-1.45211	4.53436e-07	-1.177	ENSRNOG00000005849	aconitase 1(Aco1)
Aco2	0.899161	0.016427	0.928221	0.0373257	0.999979	0.0454156	0.422674	-0.110756	0.291427	-0.147626	ENSRNOG00000024128	aconitase 2(Aco2)
Acot11	0.542758	-0.676804	0.802269	0.435403	0.999979	0.0246265	0.624384	-0.430837	0.662443	-0.412139	ENSRNOG00000007837	acyl-CoA thioesterase 11(Acot11)
Acot13	0.266986	-0.252449	0.168181	-0.392914	0.999979	-0.344697	0.000464821	-0.663738	0.122947	-0.33664	ENSRNOG00000018415	acyl-CoA thioesterase 13(Acot13)
Acot2	0.993774	0.00189138	0.65252	-0.130983	0.999979	-0.12818	0.233934	-0.172666	0.765319	-0.0550549	ENSRNOG00000010134	acyl-CoA thioesterase 2(Acot2)
Acot3	0.484221	-0.315776	0.935325	-0.107546	0.999979	-0.0855757	0.835263	-0.102423	0.953504	-0.0328384	ENSRNOG00000053460	acyl-CoA thioesterase 3(Acot3)
Acot7	0.678971	-0.0614279	0.719832	-0.107059	0.999979	-0.280407	6.66943e-16	-0.929916	5.9424e-07	-0.620927	ENSRNOG00000010580	acyl-CoA thioesterase 7(Acot7)
Acot8	0.570045	-0.155789	0.973141	0.0302618	0.968169	-0.202509	0.813886	0.0593953	0.247443	0.251011	ENSRNOG00000015187	acyl-CoA thioesterase 8(Acot8)
Acot9	0.0076757	-0.24218	0.0528957	-0.25741	0.999979	-0.0818062	0.00693103	-0.276572	0.0701038	-0.204502	ENSRNOG00000003782	acyl-CoA thioesterase 9(Acot9)
Acox1	0.013841	0.271633	0.94722	0.0240057	0.999979	0.0263827	0.330607	0.105869	0.505137	0.080468	ENSRNOG00000008755	acyl-CoA oxidase 1(Acox1)
Acox3	0.117027	0.32999	0.75745	0.109744	0.999979	0.0330225	0.843856	0.038531	0.884722	0.0303928	ENSRNOG00000008474	acyl-CoA oxidase 3, pristanoyl(Acox3)
Acp1	4.71818e-05	-0.343612	0.474385	-0.128151	0.999979	0.0184235	0.00917349	-0.24908	0.00445147	-0.282787	ENSRNOG00000005260	acid phosphatase 1, soluble(Acp1)
Acp2	0.86833	0.0370063	0.871607	-0.0559009	0.999979	-0.0791387	0.00613595	-0.319653	0.0599492	-0.24162	ENSRNOG00000013594	acid phosphatase 2, lysosomal(Acp2)
Acp5	0.956193	-0.0113709	0.0467146	-0.409349	0.171418	-0.454219	7.93138e-08	-0.806713	0.049665	-0.343087	ENSRNOG00000046261	acid phosphatase 5, tartrate resistant(Acp5)
Acp6	0.411481	-0.129847	0.829269	0.0808185	0.999979	0.131835	0.880731	-0.0284255	0.292295	-0.173839	ENSRNOG00000017494	acid phosphatase 6, lysophosphatidic(Acp6)
Acpp	0.172231	0.440293	0.992795	-0.0133412	0.999979	-0.025421	0.0169651	0.538977	0.0212476	0.551897	ENSRNOG00000011820	acid phosphatase, prostate(Acpp)
Acrbp	0.0881794	0.798396	0.669201	0.279054	0.999979	-0.0609955	0.420685	0.27129	0.267927	0.375745	ENSRNOG00000017399	acrosin binding protein(Acrbp)
Acsf2	0.71135	-0.0898471	0.773343	-0.133523	0.999979	-0.0745978	2.51102e-05	-0.751191	0.000157172	-0.714178	ENSRNOG00000003330	acyl-CoA synthetase family member 2(Acsf2)
Acsf3	0.337469	-0.358164	0.573688	-0.284806	0.651338	-0.399586	0.0505213	-0.499909	0.769134	-0.100552	ENSRNOG00000015077	acyl-CoA synthetase family member 3(Acsf3)
Acsl1	0.000385051	-0.365651	0.832168	-0.0845101	0.999979	-0.0367117	0.0439058	-0.306017	0.138058	-0.247147	ENSRNOG00000010633	acyl-CoA synthetase long-chain family member 1(Acsl1)
Acsl3	0.099021	0.27679	0.794169	0.0847691	0.999979	-0.0120682	0.714997	0.0595925	0.715452	0.0625606	ENSRNOG00000014718	acyl-CoA synthetase long-chain family member 3(Acsl3)
Acsl4	0.675497	-0.069818	0.828348	0.0822361	0.582006	0.347498	0.345194	0.150765	0.186498	-0.213761	ENSRNOG00000019180	acyl-CoA synthetase long-chain family member 4(Acsl4)
Acsl5	0.698295	0.045619	0.00557187	0.404084	0.000729545	0.613122	0.000471904	0.433395	0.191892	-0.192654	ENSRNOG00000016265	acyl-CoA synthetase long-chain family member 5(Acsl5)
Acss1	3.40684e-31	0.972978	0.756339	0.0942048	0.999979	-0.128596	0.00863955	-0.325456	0.180563	-0.190165	ENSRNOG00000007102	acyl-CoA synthetase short-chain family member 1(Acss1)
Acss2	0.00102809	0.793969	0.56959	-0.241753	0.999979	-0.305052	0.000526581	-0.707444	0.0680165	-0.418482	ENSRNOG00000018755	acyl-CoA synthetase short-chain family member 2(Acss2)
Actb	0.0224891	-0.212622	0.642211	-0.138135	0.999979	-0.0758896	2.21044e-10	-0.795989	2.1766e-07	-0.690726	ENSRNOG00000034254	actin, beta(Actb)
Actg1	0.000115501	-0.487736	0.474385	-0.197028	0.999979	-0.31321	9.67087e-18	-1.13869	1.57734e-08	-0.804701	ENSRNOG00000036701	actin, gamma 1(Actg1)
Actl6a	0.011837	-0.218197	0.627469	-0.117733	0.999979	0.0710246	0.00927263	-0.292343	0.00136662	-0.368944	ENSRNOG00000011553	actin-like 6A(Actl6a)
Actn1	0.000225155	0.524568	0.000617023	-0.530085	0.245331	-1.01296	1.50615e-32	-1.53629	0.00162505	-0.463296	ENSRNOG00000056756	actinin, alpha 1(Actn1)
Actn2	3.31428e-06	2.47541	0.95018	-0.0779025	0.999979	-0.556897	0.953832	-0.0250369	0.0712115	0.609688	ENSRNOG00000017833	actinin alpha 2(Actn2)
Actn4	0.634673	0.0831979	0.591226	0.22535	0.999979	0.165735	0.995858	0.00149224	0.842717	-0.0581113	ENSRNOG00000020433	actinin alpha 4(Actn4)
Actr10	0.225845	-0.15353	0.975016	0.0172151	0.999979	-0.0263866	0.855507	-0.0279532	0.927895	-0.0150666	ENSRNOG00000007504	actin-related protein 10 homolog(Actr10)
Actr1a	0.216394	0.13713	0.835185	0.0683292	0.802481	0.187262	0.611979	0.0761032	0.522118	-0.0976064	ENSRNOG00000019725	ARP1 actin-related protein 1 homolog A, centractin alpha(Actr1a)
Actr1b	0.905672	-0.0219456	0.505727	0.179021	0.999979	-0.0348445	0.667625	0.0760989	0.442782	0.132461	ENSRNOG00000016789	ARP1 actin-related protein 1 homolog B, centractin beta(Actr1b)
Actr2	0.0489457	-0.178864	0.129401	-0.218759	0.999979	-0.0105302	0.00025573	-0.361535	0.000936544	-0.345779	ENSRNOG00000004959	ARP2 actin related protein 2 homolog(Actr2)
Actr3	0.104251	-0.128889	0.208328	-0.201119	0.999979	0.0271292	2.43749e-07	-0.508765	7.50187e-08	-0.551619	ENSRNOG00000003206	ARP3 actin related protein 3 homolog(Actr3)
Actr5	0.05165	0.573788	0.910046	0.139171	0.999979	-0.225114	0.918696	-0.0526421	0.988682	0.00843329	ENSRNOG00000023989	ARP5 actin-related protein 5 homolog(Actr5)
Actr6	0.799268	-0.0374638	0.414318	-0.174813	0.999979	0.123543	0.332439	0.13247	0.98581	-0.00350547	ENSRNOG00000007875	ARP6 actin-related protein 6 homolog(Actr6)
Actr8	0.00637974	0.303563	0.289002	0.145258	0.118889	0.225379	0.0926315	0.150325	0.478597	-0.0758179	ENSRNOG00000015280	ARP8 actin-related protein 8 homolog(Actr8)
Acvr1b	0.20484	0.349627	0.616638	0.261663	0.999979	-0.126711	0.239617	0.315168	0.100836	0.440858	ENSRNOG00000006934	activin A receptor type 1B(Acvr1b)
Acvr2a	0.00636686	0.346827	0.832825	-0.0913871	0.999979	-0.209611	6.01824e-05	0.602057	2.18957e-07	0.792852	ENSRNOG00000005334	activin A receptor type 2A(Acvr2a)
Acy1	2.14239e-06	-0.553572	0.677667	-0.116792	0.999979	-0.215357	1.0575e-17	-0.98138	1.1273e-09	-0.742992	ENSRNOG00000011189	aminoacylase 1(Acy1)
Acy3	na	0.925874	0.762052	-0.556509	0.999979	0.0427569	0.491784	-0.609116	0.399235	-0.779263	ENSRNOG00000017901	aminoacylase 3(Acy3)
Acyp1	0.383411	-0.136502	0.585076	-0.166613	0.999979	-0.203216	0.145025	-0.230964	0.869371	-0.0349837	ENSRNOG00000006744	acylphosphatase 1(Acyp1)
Acyp2	na	na	0.646586	-0.807174	0.999979	0.263197	0.876589	-0.162591	0.475235	-0.710597	ENSRNOG00000042419	acylphosphatase 2(Acyp2)
Ada	0.0700127	-0.207691	0.487659	0.173069	0.776122	0.277318	0.231168	-0.17433	0.00102069	-0.445562	ENSRNOG00000010265	adenosine deaminase(Ada)
Adal	0.3945	0.208636	0.993716	-0.00952863	0.916524	0.259019	0.383959	0.19675	0.822093	-0.0639501	ENSRNOG00000012166	adenosine deaminase-like(Adal)
Adam10	1.8118e-08	0.578453	0.420819	-0.32595	0.999979	0.068634	0.109582	-0.386269	0.0728329	-0.446505	ENSRNOG00000054257	ADAM metallopeptidase domain 10(Adam10)
Adam17	0.0821859	0.17988	0.945037	0.0358721	0.996137	0.185348	0.00121075	0.440459	0.153023	0.226348	ENSRNOG00000060694	ADAM metallopeptidase domain 17(Adam17)
Adam19	0.107751	0.232844	0.720028	0.127265	0.999979	-0.162239	0.0267271	-0.341439	0.440836	-0.144036	ENSRNOG00000042980	ADAM metallopeptidase domain 19(Adam19)
Adam1a	0.674358	0.184421	0.856085	-0.127262	0.999979	-0.165668	0.515298	-0.190064	0.942087	-0.0261864	ENSRNOG00000001347	-
Adam4	0.858164	-0.135754	0.998104	-0.00886014	0.867376	-0.541941	0.749262	-0.172806	0.460295	0.368463	ENSRNOG00000038275	a disintegrin and metalloprotease domain 4(Adam4)
Adam8	0.488184	0.549382	0.921247	-0.243955	0.161702	-1.74564	0.111877	-1.26499	0.577801	0.503889	ENSRNOG00000017897	ADAM metallopeptidase domain 8(Adam8)
Adam9	na	na	0.990665	0.051191	0.999979	-0.0708263	0.774084	-0.258765	0.796797	-0.249505	ENSRNOG00000017231	ADAM metallopeptidase domain 9(Adam9)
Adamts10	0.000399769	0.537166	0.329546	0.41925	0.999979	0.0866879	0.936255	0.0282576	0.862961	0.0640707	ENSRNOG00000008857	ADAM metallopeptidase with thrombospondin type 1 motif, 10(Adamts10)
Adamts6	0.774022	0.271127	0.840482	-0.315604	0.445693	1.0657	0.644566	0.316312	0.397425	-0.604313	ENSRNOG00000012655	ADAM metallopeptidase with thrombospondin type 1 motif, 6(Adamts6)
Adamtsl4	0.947326	0.0567943	0.396531	0.671384	0.999979	0.212924	0.395816	-0.457157	0.292544	-0.583584	ENSRNOG00000049385	ADAMTS-like 4(Adamtsl4)
Adar	0.017349	0.36452	0.00889779	0.683586	0.551309	0.855134	7.25999e-05	0.850315	0.842717	0.065052	ENSRNOG00000020744	adenosine deaminase, RNA-specific(Adar)
Adarb1	0.0380519	-0.632672	0.47262	-0.544501	0.999659	-0.46913	0.000308024	-1.45292	0.0263978	-0.973667	ENSRNOG00000001227	adenosine deaminase, RNA-specific, B1(Adarb1)
Adat1	0.659831	-0.106723	0.636973	-0.176088	0.999979	-0.073135	0.075657	-0.317358	0.16646	-0.269555	ENSRNOG00000019434	adenosine deaminase, tRNA-specific 1(Adat1)
Adat2	0.817935	-0.15915	0.72544	0.258029	0.999979	0.109544	0.282727	0.365577	0.534585	0.245096	ENSRNOG00000046983	-
Adck1	0.119696	-0.321107	0.778157	0.142691	0.762547	0.311253	0.902009	0.0339427	0.294129	-0.252275	ENSRNOG00000012685	aarF domain containing kinase 1(Adck1)
Adck2	0.647644	0.116542	0.659145	0.198086	0.999979	0.205285	0.0138733	0.495805	0.126644	0.345838	ENSRNOG00000010005	aarF domain containing kinase 2(Adck2)
Adck5	0.926554	0.0216424	0.809819	0.101622	0.999979	-0.08232	0.612671	0.101493	0.352605	0.179753	ENSRNOG00000030334	aarF domain containing kinase 5(Adck5)
Adcy3	0.521111	0.101271	0.999677	0.00112632	0.8356	-0.170711	0.0405606	-0.264694	0.573246	-0.0911238	ENSRNOG00000003999	adenylate cyclase 3(Adcy3)
Adcy4	0.628174	-0.475472	0.930787	0.246374	0.917993	0.928028	0.667791	0.426598	0.700871	-0.419667	ENSRNOG00000020401	adenylate cyclase 4(Adcy4)
Adcy6	0.0149935	0.506706	0.945037	0.0534198	0.683388	-0.641469	4.90752e-07	-1.00901	0.166242	-0.331458	ENSRNOG00000054757	adenylate cyclase 6(Adcy6)
Adcy7	0.00499144	0.44442	0.561819	0.254142	0.999979	0.245519	0.653623	-0.123337	0.223159	-0.307575	ENSRNOG00000014776	adenylate cyclase 7(Adcy7)
Add1	1.45268e-49	1.10543	0.806637	-0.0828985	0.999979	-0.162652	0.680152	-0.0682804	0.470208	0.116755	ENSRNOG00000013039	adducin 1(Add1)
Add3	9.02289e-25	1.13693	0.657267	-0.231517	0.999979	0.0718873	0.631393	-0.142733	0.646873	-0.143585	ENSRNOG00000012820	adducin 3(Add3)
Adgrd1	na	0.0995895	0.359441	0.849097	0.00374381	1.84731	0.00180765	1.60864	0.769879	-0.236977	ENSRNOG00000023536	adhesion G protein-coupled receptor D1(Adgrd1)
Adgre5	0.851624	0.0272643	0.394617	0.218239	0.999979	-0.0337179	0.740227	-0.0638149	0.99853	0.000365517	ENSRNOG00000004489	adhesion G protein-coupled receptor E5(Adgre5)
Adgrg1	0.827812	-0.174885	0.070832	-1.88776	0.886781	-0.936989	0.0368016	-1.65374	0.530903	-0.575471	ENSRNOG00000014963	adhesion G protein-coupled receptor G1(Adgrg1)
Adgrg5	0.243583	-0.608522	0.675787	-0.521804	0.999979	-0.416889	1.11077e-05	-2.6509	0.000284735	-2.27702	ENSRNOG00000039891	adhesion G protein-coupled receptor G5(Adgrg5)
Adgrl1	0.14375	-0.406247	0.813802	-0.260458	0.524841	-1.05303	0.142111	-0.664534	0.765319	0.174548	ENSRNOG00000029134	adhesion G protein-coupled receptor L1(Adgrl1)
Adh5	0.0151239	-0.2504	0.435281	-0.134069	0.999979	0.040561	0.00547499	-0.261981	0.00131448	-0.313352	ENSRNOG00000046357	alcohol dehydrogenase 5 (class III), chi polypeptide(Adh5)
Adi1	0.450263	-0.111211	0.72829	-0.115466	0.999979	-0.0495322	0.000358711	-0.484712	0.00148555	-0.458024	ENSRNOG00000008950	acireductone dioxygenase 1(Adi1)
Adipor1	0.000726859	0.29008	0.538746	0.109243	0.999979	-0.0290008	0.117137	0.148589	0.0735544	0.174779	ENSRNOG00000004143	adiponectin receptor 1(Adipor1)
Adipor2	0.354483	0.309227	0.635496	0.248702	0.999979	0.121111	0.0860522	0.432352	0.19742	0.355729	ENSRNOG00000007990	adiponectin receptor 2(Adipor2)
Adk	2.96282e-05	-0.355613	0.00210705	-0.543163	0.999979	-0.392442	5.80014e-17	-1.20682	1.16357e-07	-0.823946	ENSRNOG00000012325	adenosine kinase(Adk)
Adnp	0.656573	0.0823606	0.887738	0.0551939	0.999979	-0.0529548	0.971615	0.00630334	0.647456	0.0760573	ENSRNOG00000010975	activity-dependent neuroprotector homeobox(Adnp)
Adnp2	0.904476	-0.0429433	0.901656	0.173496	0.999979	0.259246	0.639942	-0.257225	0.238671	-0.603608	ENSRNOG00000053370	ADNP homeobox 2(Adnp2)
Adora2a	7.89342e-06	0.821678	0.10543	0.502505	0.931882	0.300933	0.20276	-0.316538	0.0147978	-0.587376	ENSRNOG00000001302	adenosine A2a receptor(Adora2a)
Adora2b	0.871221	-0.131076	0.622183	0.476301	0.999979	0.0179583	0.0675747	-0.923276	0.0837671	-0.93163	ENSRNOG00000002922	adenosine A2B receptor(Adora2b)
Adpgk	0.879015	0.0256388	0.650231	-0.101311	0.773435	-0.212508	0.458613	0.0878247	0.00432706	0.296691	ENSRNOG00000026178	ADP-dependent glucokinase(Adpgk)
Adprh	0.0783883	-0.218345	0.910394	0.048815	0.999979	-0.10225	0.337747	-0.145105	0.84463	-0.0377185	ENSRNOG00000027260	ADP-ribosylarginine hydrolase(Adprh)
Adprhl2	0.837496	-0.0476308	0.586341	0.197912	0.904433	-0.362971	0.990735	-0.00320449	0.0463713	0.377813	ENSRNOG00000010849	ADP-ribosylhydrolase like 2(Adprhl2)
Adprm	0.874951	0.0254511	0.0147442	0.301019	0.10903	0.406545	9.6146e-13	0.6684	0.0136027	0.270046	ENSRNOG00000003397	ADP-ribose/CDP-alcohol diphosphatase, manganese-dependent(Adprm)
Adrb2	0.212971	0.639053	0.286555	0.440191	0.999979	0.176174	9.5495e-11	1.437	1.82927e-07	1.24764	ENSRNOG00000019217	adrenoceptor beta 2(Adrb2)
Adrm1	4.70564e-05	-0.330519	0.82011	0.075634	0.999979	-0.00391111	0.887888	0.0242538	0.792217	0.0468416	ENSRNOG00000055984	adhesion regulating molecule 1(Adrm1)
Adsl	0.0039817	-0.265484	0.183649	-0.256032	0.999979	-0.314086	0.000894674	-0.420841	0.681544	-0.0716573	ENSRNOG00000018655	adenylosuccinate lyase(Adsl)
Adss	0.213267	-0.115309	0.553111	0.147496	0.875633	0.401982	0.943269	-0.0119903	0.00209997	-0.390697	ENSRNOG00000004481	adenylosuccinate synthase(Adss)
Aebp2	0.745426	-0.166457	0.817356	-0.169503	0.999979	-0.0700594	0.471247	-0.233481	0.809987	-0.0939302	ENSRNOG00000008929	AE binding protein 2(Aebp2)
Aen	0.0021427	-0.342152	0.958283	-0.0352678	0.975924	-0.249069	0.690163	-0.0848864	0.356298	0.184214	ENSRNOG00000018421	apoptosis enhancing nuclease(Aen)
Aff1	0.0906198	0.712439	0.394281	0.386726	0.999979	-0.182081	0.0271752	0.570898	0.00334046	0.765931	ENSRNOG00000002232	AF4/FMR2 family, member 1(Aff1)
Aff3	0.0728175	0.675617	0.762975	0.260805	0.904433	-0.655976	0.279835	0.421886	0.0532077	0.727003	ENSRNOG00000018830	AF4/FMR2 family, member 3(Aff3)
Aff4	1.028e-07	0.577852	0.550383	0.187171	0.999979	-0.0573274	0.00112179	0.493071	0.000580125	0.54135	ENSRNOG00000006965	AF4/FMR2 family, member 4(Aff4)
Afg3l1	0.493844	-0.101443	0.99487	0.00495915	0.999979	-0.0529195	0.0304392	-0.260295	0.143527	-0.195116	ENSRNOG00000026994	AFG3(ATPase family gene 3)-like 1 (S. cerevisiae)(Afg3l1)
Afg3l2	0.274235	0.121649	0.998999	0.00246528	0.999979	0.0491749	0.15569	-0.204147	0.0742184	-0.261146	ENSRNOG00000017965	AFG3 like matrix AAA peptidase subunit 2(Afg3l2)
Aftph	2.17746e-05	0.413965	0.183649	0.204078	0.296863	0.303439	0.00100911	0.330506	0.794532	0.0383821	ENSRNOG00000005411	aftiphilin(Aftph)
Aga	0.454148	0.140653	0.978228	0.0176416	0.982308	-0.144549	0.0544092	0.256437	0.00353628	0.387974	ENSRNOG00000000108	aspartylglucosaminidase(Aga)
Agap1	0.973636	0.0091885	0.581957	-0.264324	0.999979	0.153181	0.762308	0.0923405	0.906751	-0.0398299	ENSRNOG00000019476	ArfGAP with GTPase domain, ankyrin repeat and PH domain 1(Agap1)
Agap2	0.961031	-0.0399427	0.591226	0.627934	0.999979	-0.330056	0.618009	0.349924	0.27828	0.7149	ENSRNOG00000025584	ArfGAP with GTPase domain, ankyrin repeat and PH domain 2(Agap2)
Agap3	0.377236	-0.262216	0.906294	0.0735539	0.857074	-0.259319	0.869479	-0.0430169	0.340473	0.217364	ENSRNOG00000012764	ArfGAP with GTPase domain, ankyrin repeat and PH domain 3(Agap3)
Agbl2	0.865622	-0.166974	0.159591	-1.41349	0.975924	-0.649133	0.0247793	-1.57525	0.20671	-0.967767	ENSRNOG00000008467	ATP/GTP binding protein-like 2(Agbl2)
Agbl5	0.490727	0.24808	0.913219	0.103638	0.999979	0.11545	0.768179	-0.112951	0.773933	-0.116273	ENSRNOG00000008612	ATP/GTP binding protein-like 5(Agbl5)
Ager	0.256033	0.709889	0.849414	0.265792	0.999979	-0.111767	0.567196	0.348779	0.365746	0.543379	ENSRNOG00000000439	advanced glycosylation end product-specific receptor(Ager)
Agfg1	0.0512521	-0.599493	0.626138	0.235941	0.999979	0.301468	0.654175	0.126838	0.496032	-0.196749	ENSRNOG00000015619	ArfGAP with FG repeats 1(Agfg1)
Agfg2	0.561368	-0.120422	0.851775	0.09888	0.999979	-0.0617885	0.0730005	-0.353638	0.200822	-0.277164	ENSRNOG00000001404	ArfGAP with FG repeats 2(Agfg2)
Aggf1	0.898862	0.0277058	0.752973	0.0850088	0.935343	-0.175758	0.45329	-0.0980993	0.580044	0.0792557	ENSRNOG00000029304	angiogenic factor with G patch and FHA domains 1(Aggf1)
Agk	0.00483922	-0.295938	0.0844179	-0.225812	0.971867	-0.175307	3.13856e-08	-0.501751	0.00136313	-0.319958	ENSRNOG00000011509	acylglycerol kinase(Agk)
Agl	0.613044	0.12936	0.98919	-0.015736	0.999979	-0.0356137	0.0654009	0.357399	0.0522437	0.393297	ENSRNOG00000016214	amylo-alpha-1, 6-glucosidase, 4-alpha-glucanotransferase(Agl)
Ago1	0.676915	0.137301	0.907961	0.0794345	0.907687	-0.348042	0.556512	-0.150584	0.497425	0.177139	ENSRNOG00000055915	argonaute 1, RISC catalytic component(Ago1)
Ago2	0.417509	-0.264285	0.184273	0.400918	0.999979	-0.0598611	0.00586039	0.548719	0.00262682	0.622788	ENSRNOG00000008533	argonaute 2, RISC catalytic component(Ago2)
Ago3	0.620489	-0.164658	0.935325	-0.0731287	0.999979	0.261321	0.00437918	0.68844	0.17783	0.380175	ENSRNOG00000034269	argonaute 3, RISC catalytic component(Ago3)
Ago4	0.000158912	1.44549	0.859724	-0.170156	0.999979	-0.288387	0.278751	-0.404384	0.704494	-0.170262	ENSRNOG00000025596	argonaute 4, RISC catalytic component(Ago4)
Agpat1	0.456548	-0.160878	0.996282	0.00564439	0.999979	0.0130277	0.955645	0.0144655	0.824921	0.060872	ENSRNOG00000000437	1-acylglycerol-3-phosphate O-acyltransferase 1(Agpat1)
Agpat3	0.379514	-0.168866	0.969241	0.0261278	0.931882	-0.243875	1.74651e-06	-0.691806	0.00501911	-0.446584	ENSRNOG00000001205	1-acylglycerol-3-phosphate O-acyltransferase 3(Agpat3)
Agpat4	0.000182212	-0.812281	0.140141	-0.47341	na	-0.328879	0.0306281	-0.496118	0.591683	-0.155617	ENSRNOG00000017731	1-acylglycerol-3-phosphate O-acyltransferase 4(Agpat4)
Agpat5	3.08316e-05	-0.569052	0.896662	-0.0670838	0.999979	0.0533878	0.828305	-0.0478312	0.987663	0.0040551	ENSRNOG00000028623	1-acylglycerol-3-phosphate O-acyltransferase 5(Agpat5)
Agps	0.156044	0.255771	0.999876	-0.000288457	0.999979	0.0517452	0.870292	0.0549503	0.989153	-0.00524214	ENSRNOG00000001547	alkylglycerone phosphate synthase(Agps)
Agrp	na	-1.00083	0.338727	-1.27475	0.370138	-1.6306	0.0513956	-1.62139	0.995733	-0.00574022	ENSRNOG00000039001	agouti related neuropeptide(Agrp)
Agtpbp1	0.674535	-0.155452	0.435281	-0.517811	0.999979	0.0834606	0.0162375	-0.895279	0.00446252	-1.10326	ENSRNOG00000018651	ATP/GTP binding protein 1(Agtpbp1)
Agtrap	0.695041	-0.0740263	0.799279	0.0889385	0.520473	0.260035	0.299632	0.157419	0.498496	-0.115569	ENSRNOG00000008619	angiotensin II receptor-associated protein(Agtrap)
Ahctf1	0.775165	0.0483024	0.998999	-0.00165464	0.651338	-0.176724	0.915759	0.0153393	0.0997332	0.192703	ENSRNOG00000023541	AT hook containing transcription factor 1(Ahctf1)
Ahcy	0.00206609	-0.51505	0.25325	0.25757	0.999979	0.0655645	0.0402361	-0.304926	0.00987413	-0.393368	ENSRNOG00000017777	adenosylhomocysteinase(Ahcy)
Ahcyl1	0.0847026	-0.224504	0.875424	-0.0517813	0.999979	-0.0715026	0.0277345	-0.248954	0.19645	-0.164913	ENSRNOG00000018569	adenosylhomocysteinase-like 1(Ahcyl1)
Ahcyl2	4.31255e-06	0.639686	0.902145	-0.0866937	0.82101	-0.351144	0.00763532	-0.58586	0.343669	-0.250199	ENSRNOG00000039300	adenosylhomocysteinase-like 2(Ahcyl2)
Ahdc1	0.544111	-0.28654	0.862829	-0.175782	0.89781	-0.661318	0.757691	-0.141056	0.230802	0.471558	ENSRNOG00000042855	AT hook, DNA binding motif, containing 1(Ahdc1)
Ahi1	0.628054	-0.0787568	0.0996184	-0.316091	0.999979	-0.120701	0.0513954	-0.281875	0.202621	-0.20557	ENSRNOG00000013969	Abelson helper integration site 1(Ahi1)
Ahnak	na	na	0.883112	-0.309348	0.999979	-0.480939	0.514955	0.510863	0.181004	0.98641	ENSRNOG00000057569	AHNAK nucleoprotein(Ahnak)
Ahr	0.160297	-0.303667	0.027884	-0.761363	0.802481	-0.464898	0.293864	-0.329844	0.64371	0.170104	ENSRNOG00000004342	aryl hydrocarbon receptor(Ahr)
Ahrr	0.176342	-0.440036	0.0204909	-0.937538	0.935343	-0.635621	0.0160166	-0.792832	0.651472	-0.190577	ENSRNOG00000014721	aryl-hydrocarbon receptor repressor(Ahrr)
Ahsa1	0.000265073	-0.3172	0.809698	-0.0881194	0.999979	-0.0573456	0.00513382	-0.387612	0.0333714	-0.319238	ENSRNOG00000048981	activator of Hsp90 ATPase activity 1(Ahsa1)
Ahsa2	0.544111	-0.144868	0.911915	0.065342	0.999979	-0.122699	0.00293067	-0.532184	0.0679004	-0.362545	ENSRNOG00000052142	AHA1, activator of heat shock protein ATPase 2(Ahsa2)
Aida	0.481598	0.152198	0.008177	0.526047	0.0135942	0.617814	3.73408e-06	0.742917	0.632381	0.109264	ENSRNOG00000058805	axin interactor, dorsalization associated(Aida)
Aif1l	na	na	0.998999	-0.016775	0.718332	-2.37792	0.00577582	-3.3499	0.298752	-1.30905	ENSRNOG00000009951	allograft inflammatory factor 1-like(Aif1l)
Aifm1	0.00865871	-0.273667	0.902145	0.0476575	0.999979	0.222695	0.238058	-0.157721	0.000876783	-0.412421	ENSRNOG00000006067	apoptosis inducing factor, mitochondria associated 1(Aifm1)
Aifm2	0.909043	0.0574408	0.885953	0.125803	0.430971	-0.521748	0.00708204	-0.800769	0.41892	-0.287886	ENSRNOG00000059445	apoptosis inducing factor, mitochondria associated 2(Aifm2)
Aifm3	0.0184047	1.0378	0.777898	0.260724	0.999979	-0.437287	0.132485	0.580329	0.0173476	0.900295	ENSRNOG00000037957	apoptosis inducing factor, mitochondria associated 3(Aifm3)
Aig1	0.567083	-0.140575	0.861965	-0.0985951	0.971867	-0.197566	0.28173	-0.235234	0.833857	-0.0588309	ENSRNOG00000010753	androgen-induced 1(Aig1)
Aim2	0.657371	0.115732	0.685339	-0.173709	0.999979	0.0325093	0.000317325	0.636954	0.00136885	0.601674	ENSRNOG00000003480	absent in melanoma 2(Aim2)
Aimp1	0.000953345	-0.298754	0.795306	-0.0692882	0.999979	-0.0315543	0.0713443	-0.195574	0.178642	-0.159936	ENSRNOG00000011384	aminoacyl tRNA synthetase complex-interacting multifunctional protein 1(Aimp1)
Aimp2	2.16894e-10	-0.531769	0.335123	-0.190694	0.999979	-0.108209	0.000105679	-0.440633	0.0134863	-0.309248	ENSRNOG00000001044	aminoacyl tRNA synthetase complex-interacting multifunctional protein 2(Aimp2)
Aip	0.045411	-0.223356	0.880515	-0.0479031	0.999979	-0.026173	0.775006	-0.0402813	0.988691	-0.00235947	ENSRNOG00000022289	aryl-hydrocarbon receptor-interacting protein(Aip)
Ak2	1.1241e-10	-0.537588	0.645293	-0.181882	na	-0.0881317	0.000534919	-0.607792	0.00737841	-0.507661	ENSRNOG00000000122	adenylate kinase 2(Ak2)
Ak3	0.168685	-0.214599	0.976264	-0.021599	0.999979	-0.0309397	0.204414	-0.206703	0.260458	-0.196579	ENSRNOG00000052506	adenylate kinase 3(Ak3)
Ak6	0.00189347	-0.720885	0.950146	-0.0539605	0.999979	-0.351794	0.619918	-0.137487	0.424305	0.216026	ENSRNOG00000026813	-
Ak6	3.18105e-10	-0.483916	0.577277	-0.159406	0.999979	-0.0803799	0.569569	-0.0974088	0.961595	-0.0106105	ENSRNOG00000039848	adenylate kinase 6(Ak6)
Akap1	0.0178216	-0.59075	0.711423	0.17749	0.999979	-0.249084	0.019907	-0.497959	0.296035	-0.259716	ENSRNOG00000002373	A-kinase anchoring protein 1(Akap1)
Akap10	0.320006	0.364569	0.773022	0.224325	0.999979	-0.0785367	0.0353999	0.660721	0.0629811	0.62349	ENSRNOG00000002899	A-kinase anchoring protein 10(Akap10)
Akap11	9.35418e-05	0.454869	0.994121	0.0123169	0.999979	0.0935444	0.721336	0.125786	0.985802	0.00791184	ENSRNOG00000009987	A-kinase anchoring protein 11(Akap11)
Akap13	3.13931e-08	0.448992	0.800992	0.0960412	0.999979	-0.0804837	1.88286e-08	0.763842	1.54982e-09	0.851586	ENSRNOG00000010964	A-kinase anchoring protein 13(Akap13)
Akap14	na	na	0.751546	0.443305	0.946107	0.627225	0.781939	0.213098	0.592451	-0.422804	ENSRNOG00000006899	A-kinase anchoring protein 14(Akap14)
Akap17a	0.346925	0.163229	0.0821404	0.325779	0.999979	-0.0668037	0.0171051	0.334913	0.0068662	0.392759	ENSRNOG00000028211	A-kinase anchoring protein 17A(Akap17a)
Akap17b	0.00567831	0.466802	0.958973	-0.0331416	0.999979	0.0271992	0.000957841	0.500326	0.00466747	0.4572	ENSRNOG00000009746	A kinase (PRKA) anchor protein 17B(Akap17b)
Akap2	0.882837	-0.0717449	6.90333e-08	1.64184	0.00854406	1.80005	2.05586e-06	1.40124	0.485796	-0.280831	ENSRNOG00000011504	A-kinase anchoring protein 2(Akap2)
Akap5	na	-0.000251634	0.625323	0.541602	0.892708	0.612766	0.000755446	1.58841	0.0594771	1.02438	ENSRNOG00000006410	A-kinase anchoring protein 5(Akap5)
Akap8	0.0236484	0.207705	0.918362	0.0354421	0.999979	0.0771887	0.99413	-0.00111552	0.589628	-0.0719569	ENSRNOG00000006559	A-kinase anchoring protein 8(Akap8)
Akap8l	5.90362e-12	0.766393	0.346608	0.290326	0.999979	-0.0878748	0.00972665	0.471774	0.00819608	0.504862	ENSRNOG00000006355	A-kinase anchoring protein 8 like(Akap8l)
Akap9	0.0712027	0.257198	0.995106	0.00820732	0.999979	-0.10068	0.119124	0.341604	0.0262713	0.487179	ENSRNOG00000026319	A-kinase anchoring protein 9(Akap9)
Akip1	0.75203	-0.0905073	0.699635	0.122338	0.999979	-0.125224	0.77175	0.0528469	0.257065	0.181211	ENSRNOG00000013744	A-kinase interacting protein 1(Akip1)
Akirin1	0.0273339	0.244482	8.2962e-05	0.439072	8.93461e-08	0.599625	5.32245e-10	0.613967	0.952237	0.00990341	ENSRNOG00000026610	akirin 1(Akirin1)
Akirin2	0.424536	0.296464	0.81222	0.194861	0.999979	-0.233632	0.387528	0.310824	0.254439	0.415948	ENSRNOG00000008288	akirin 2(Akirin2)
Akna	0.919923	0.0483976	0.978295	0.0300576	0.999979	-0.056269	0.87223	-0.0489676	0.750391	0.0990168	ENSRNOG00000008005	AT-hook transcription factor(Akna)
Akr1a1	1.93015e-05	-0.435575	0.891533	-0.0545931	0.999979	-0.0540506	0.0133163	-0.318184	0.0713765	-0.252869	ENSRNOG00000016727	aldo-keto reductase family 1 member A1(Akr1a1)
Akr1b1	1.18814e-06	-0.366204	0.08129	-0.261859	0.999979	-0.0704694	2.46941e-08	-0.580464	1.62458e-06	-0.528508	ENSRNOG00000009513	aldo-keto reductase family 1 member B(Akr1b1)
Akr1b8	0.0670973	-0.593179	6.33665e-11	-2.76809	0.000125665	-2.82076	4.85784e-10	-2.42085	0.873723	0.0861125	ENSRNOG00000009734	aldo-keto reductase family 1, member B8(Akr1b8)
Akr1e2	0.00171239	-0.615682	0.527116	-0.225	0.999979	-0.283042	0.00210805	-0.55023	0.192643	-0.270937	ENSRNOG00000017165	aldo-keto reductase family 1, member E2(Akr1e2)
Akr7a2	0.233699	-0.212632	0.835449	-0.0764637	0.789245	-0.3066	3.24633e-06	-0.5958	0.0462679	-0.292057	ENSRNOG00000017780	aldo-keto reductase family 7, member A2(Akr7a2)
Akr7a3	na	1.53399	0.975297	-0.0937354	0.999979	0.720118	0.303926	-0.755323	0.0616769	-1.42968	ENSRNOG00000017899	aldo-keto reductase family 7 member A3(Akr7a3)
Akt1	0.00798154	-0.388823	0.839391	-0.113064	0.296863	-0.617331	4.34619e-06	-0.885424	0.330508	-0.235421	ENSRNOG00000028629	AKT serine/threonine kinase 1(Akt1)
Akt1s1	0.71669	0.0801529	0.602281	0.19577	0.999979	0.0613045	0.166204	0.266082	0.304797	0.216903	ENSRNOG00000020289	AKT1 substrate 1(Akt1s1)
Akt2	0.230498	0.215049	0.651782	0.218236	0.999979	0.298434	0.944951	-0.0207044	0.317512	-0.262431	ENSRNOG00000018677	AKT serine/threonine kinase 2(Akt2)
Akt3	0.0588125	0.658857	0.839009	0.16765	0.999979	-0.185305	0.00374224	0.826637	0.00106303	0.962472	ENSRNOG00000021497	AKT serine/threonine kinase 3(Akt3)
Aktip	0.594735	0.0880734	0.0242681	-0.410786	0.999979	-0.178616	0.661267	-0.0824781	0.570838	0.107987	ENSRNOG00000011956	AKT interacting protein(Aktip)
Alad	9.22877e-06	-0.543331	0.521302	-0.253108	0.368742	-0.564896	0.00222401	-0.608619	0.933692	-0.0246274	ENSRNOG00000015206	aminolevulinate dehydratase(Alad)
Alas1	0.344052	0.145606	0.954962	-0.0268189	0.999979	0.0281985	0.129738	0.192928	0.24648	0.161663	ENSRNOG00000056596	5'-aminolevulinate synthase 1(Alas1)
Alcam	0.786578	0.122356	0.369049	0.683658	0.886781	1.04702	0.3402	-0.489711	0.00559966	-1.32876	ENSRNOG00000001989	activated leukocyte cell adhesion molecule(Alcam)
Aldh16a1	0.969607	0.00846839	0.740521	0.155094	0.999979	-0.168877	0.878773	-0.0406474	0.451143	0.182485	ENSRNOG00000020623	aldehyde dehydrogenase 16 family, member A1(Aldh16a1)
Aldh18a1	0.894563	0.165861	0.482357	0.394121	0.929079	-0.417703	0.427555	-0.276412	0.72503	0.143463	ENSRNOG00000060047	aldehyde dehydrogenase 18 family, member A1(Aldh18a1)
Aldh2	0.0416228	0.247849	0.935636	0.0477186	0.999979	-0.200209	7.72103e-06	-0.702979	0.0154377	-0.425852	ENSRNOG00000001344	aldehyde dehydrogenase 2 family (mitochondrial)(Aldh2)
Aldh3a2	0.138907	0.162406	0.93207	0.022711	0.999979	0.00980792	0.415293	-0.0706736	0.39511	-0.0775106	ENSRNOG00000002342	aldehyde dehydrogenase 3 family, member A2(Aldh3a2)
Aldh3b1	0.705194	0.204836	0.737051	0.219233	0.999979	-0.136677	0.717696	0.127408	0.407204	0.274551	ENSRNOG00000017512	aldehyde dehydrogenase 3 family, member B1(Aldh3b1)
Aldh5a1	0.746656	-0.248955	0.902562	-0.220091	0.999979	0.0165898	0.568074	-0.392956	0.570838	-0.411559	ENSRNOG00000023538	aldehyde dehydrogenase 5 family, member A1(Aldh5a1)
Aldh6a1	0.401152	-0.118846	0.554072	-0.195017	0.999979	-0.0253826	0.126457	-0.266279	0.16953	-0.255895	ENSRNOG00000011419	aldehyde dehydrogenase 6 family, member A1(Aldh6a1)
Aldh7a1	3.6356e-06	-0.645276	0.79452	-0.154919	0.999979	-0.272631	4.35256e-06	-1.01342	0.00251819	-0.725995	ENSRNOG00000014645	aldehyde dehydrogenase 7 family, member A1(Aldh7a1)
Aldh8a1	na	na	0.38197	0.992793	0.999979	-0.402182	0.0209575	1.46976	0.00365354	1.86681	ENSRNOG00000014907	aldehyde dehydrogenase 8 family, member A1(Aldh8a1)
Aldh9a1	0.363344	0.0981087	0.232183	-0.14659	0.999979	-0.0251322	0.120505	-0.130933	0.235727	-0.109243	ENSRNOG00000004027	aldehyde dehydrogenase 9 family, member A1(Aldh9a1)
Aldoa	9.65685e-17	-0.584511	0.00247715	-0.425749	0.943027	-0.389097	7.28514e-12	-0.792118	0.00563745	-0.364904	ENSRNOG00000052802	aldolase, fructose-bisphosphate A(Aldoa)
Aldoc	0.805799	0.246728	0.6554	0.541822	0.999979	0.347399	0.947081	-0.0507139	0.534105	-0.45864	ENSRNOG00000011452	aldolase, fructose-bisphosphate C(Aldoc)
Alg1	0.104283	0.282791	0.393383	0.15573	0.999979	-0.0857568	0.131636	0.166238	0.0195413	0.255761	ENSRNOG00000002883	ALG1, chitobiosyldiphosphodolichol beta-mannosyltransferase(Alg1)
Alg10	0.842072	-0.0721589	0.910183	0.0980093	0.999979	-0.092459	2.99781e-05	1.0273	3.27273e-05	1.07202	ENSRNOG00000014511	ALG10, alpha-1,2-glucosyltransferase(Alg10)
Alg11	0.299514	0.139011	0.787066	-0.0846289	0.999979	0.00265032	0.000101304	0.453782	7.94441e-05	0.482307	ENSRNOG00000012841	ALG11, alpha-1,2-mannosyltransferase(Alg11)
Alg12	0.210211	-0.175432	0.818795	0.0643814	0.999979	-0.158469	0.0491397	0.212006	0.00063451	0.36142	ENSRNOG00000004591	ALG12, alpha-1,6-mannosyltransferase(Alg12)
Alg14	0.556694	-0.114073	0.669667	-0.13914	0.999979	0.138595	0.202117	0.20032	0.8952	0.0278106	ENSRNOG00000011528	ALG14, UDP-N-acetylglucosaminyltransferase subunit(Alg14)
Alg2	0.969914	-0.00591385	0.583646	-0.125147	0.999979	0.0372874	0.638587	0.0650854	0.869588	0.0261083	ENSRNOG00000006369	ALG2, alpha-1,3/1,6-mannosyltransferase(Alg2)
Alg3	0.00514451	-0.293329	0.558906	-0.122505	0.999979	-0.147877	0.582488	0.0697215	0.0399163	0.227878	ENSRNOG00000001712	ALG3, alpha-1,3- mannosyltransferase(Alg3)
Alg5	0.137593	-0.164667	0.155651	-0.178436	0.999979	-0.081714	0.165934	0.12909	0.0157837	0.220342	ENSRNOG00000058694	ALG5, dolichyl-phosphate beta-glucosyltransferase(Alg5)
Alg6	0.900962	0.0421655	0.833429	-0.140317	0.999979	0.183031	0.435538	-0.22431	0.0690151	-0.494737	ENSRNOG00000009045	ALG6, alpha-1,3-glucosyltransferase(Alg6)
Alg8	0.522218	-0.152458	0.974097	-0.023956	0.999979	0.0818122	0.278779	0.183534	0.669979	0.0871285	ENSRNOG00000012292	ALG8, alpha-1,3-glucosyltransferase(Alg8)
Alg9	0.496684	0.304778	0.756686	0.210709	0.69454	-0.431637	0.665533	-0.153795	0.357346	0.306787	ENSRNOG00000010877	ALG9, alpha-1,2-mannosyltransferase(Alg9)
Alkbh1	0.310876	-0.12358	0.975016	-0.0138091	0.999979	-0.117727	0.960476	0.00624186	0.216408	0.130957	ENSRNOG00000012264	alkB homolog 1, histone H2A dioxygenase(Alkbh1)
Alkbh2	0.104999	-0.292514	0.719086	-0.123594	0.577607	-0.33634	4.25866e-06	-0.64119	0.0540297	-0.30775	ENSRNOG00000028584	alkB homolog 2, alpha-ketoglutarate-dependent dioxygenase(Alkbh2)
Alkbh3	0.720339	-0.0485468	0.964226	-0.0172928	0.999979	-0.0242512	0.729189	-0.0410013	0.909933	-0.015093	ENSRNOG00000021678	alkB homolog 3, alpha-ketoglutarate-dependent dioxygenase(Alkbh3)
Alkbh4	0.0133892	0.301089	0.99487	0.00508101	0.999979	-0.0675526	0.0687117	0.226575	0.0378874	0.266996	ENSRNOG00000001428	alkB homolog 4, lysine demethylase(Alkbh4)
Alkbh5	0.0163004	0.287259	0.435281	0.199051	0.999979	0.0693763	0.855485	0.0348923	0.993712	0.00175433	ENSRNOG00000028341	alkB homolog 5, RNA demethylase(Alkbh5)
Alkbh6	0.000474948	-0.416991	0.00169916	-0.337588	0.941272	-0.306766	2.10102e-06	-0.434176	0.25071	-0.130182	ENSRNOG00000025216	alkB homolog 6(Alkbh6)
Alkbh7	0.577963	0.1357	0.278931	0.218661	0.999979	0.0902608	0.324564	0.140731	0.764221	0.0535337	ENSRNOG00000047089	alkB homolog 7(Alkbh7)
Alkbh8	0.519948	-0.17003	0.654824	0.126121	0.763186	0.277001	7.00459e-10	0.693182	0.00102092	0.417692	ENSRNOG00000024525	alkB homolog 8, tRNA methyltransferase(Alkbh8)
Alms1	0.273806	0.249533	0.797469	-0.0981933	0.999979	0.0280299	0.00806282	-0.39291	0.00938954	-0.407526	ENSRNOG00000022343	ALMS1, centrosome and basal body associated protein(Alms1)
Alox12	na	na	0.905771	-0.368613	0.999979	-0.582703	0.844363	0.24374	0.377915	0.96535	ENSRNOG00000027037	arachidonate 12-lipoxygenase, 12S type(Alox12)
Alox5ap	0.01164	-1.10576	0.282345	-0.952245	0.836023	-1.01051	5.75005e-05	-2.32564	0.00886285	-1.57949	ENSRNOG00000000907	arachidonate 5-lipoxygenase activating protein(Alox5ap)
Alpl	0.000236636	-1.38342	0.26934	-1.14774	0.999979	-0.0893488	0.000238722	-2.47296	6.67947e-05	-2.92751	ENSRNOG00000013954	alkaline phosphatase, liver/bone/kidney(Alpl)
Als2	0.539589	0.249226	0.649482	0.274278	0.999979	0.178841	9.34366e-06	1.11302	0.000504294	0.942504	ENSRNOG00000023280	alsin Rho guanine nucleotide exchange factor(Als2)
Alyref	0.137686	-0.618397	0.981117	0.0383252	0.999979	-0.496927	0.156174	-0.520189	0.881502	-0.0718463	ENSRNOG00000036687	Aly/REF export factor(Alyref)
Amacr	0.0936854	0.308132	0.999155	0.00170649	0.90272	0.229919	0.913405	-0.0227193	0.130029	-0.261906	ENSRNOG00000018662	alpha-methylacyl-CoA racemase(Amacr)
Ambra1	0.00740894	0.441888	0.279824	0.390151	0.999979	-0.000589923	0.225499	0.301161	0.20565	0.329067	ENSRNOG00000017422	autophagy and beclin 1 regulator 1(Ambra1)
Amd1	1.25153e-07	-0.543532	0.732653	-0.160959	0.999979	0.0069418	0.000501253	-0.670325	0.000810167	-0.678218	ENSRNOG00000000585	adenosylmethionine decarboxylase 1(Amd1)
Amdhd2	0.298688	-0.225719	0.963106	0.0432712	0.999979	-0.27478	0.820596	-0.0679563	0.500338	0.185901	ENSRNOG00000006460	amidohydrolase domain containing 2(Amdhd2)
Amer1	0.79788	0.178667	0.852314	-0.324919	0.999979	-0.314529	0.627275	-0.373579	0.969571	0.0378959	ENSRNOG00000007984	APC membrane recruitment protein 1(Amer1)
Amfr	0.8443	-0.0648335	0.611875	0.192718	0.648768	-0.298971	0.850985	-0.0456262	0.25183	0.238916	ENSRNOG00000055446	autocrine motility factor receptor(Amfr)
Amhr2	na	na	0.869245	0.434557	0.999979	-0.389624	0.190006	1.2094	0.0972124	1.5477	ENSRNOG00000014850	anti-Mullerian hormone receptor type 2(Amhr2)
Amigo1	0.133495	0.39206	0.990447	0.0161312	0.999979	0.286006	0.828314	-0.0600152	0.189737	-0.312448	ENSRNOG00000045665	adhesion molecule with Ig like domain 1(Amigo1)
Amigo2	0.955134	-0.0588233	0.189384	0.83531	0.931882	0.488801	0.0213864	0.982297	0.348692	0.488913	ENSRNOG00000007032	adhesion molecule with Ig like domain 2(Amigo2)
Ammecr1l	0.178991	0.176389	0.462586	0.136262	0.929658	0.167201	0.02001	0.233928	0.551082	0.0762547	ENSRNOG00000016250	AMMECR1 like(Ammecr1l)
Amn1	0.483572	0.136621	0.963152	-0.0286016	0.999979	0.133105	0.0448015	0.299396	0.265044	0.190625	ENSRNOG00000036917	antagonist of mitotic exit network 1 homolog(Amn1)
Ampd1	na	0.44267	0.237038	0.940003	0.445405	1.08705	0.0305093	1.11192	0.992271	-0.00830081	ENSRNOG00000018656	adenosine monophosphate deaminase 1(Ampd1)
Ampd2	0.0683136	-0.325476	0.804848	0.174109	0.999979	0.26118	0.116173	-0.453764	0.0262385	-0.644242	ENSRNOG00000019240	adenosine monophosphate deaminase 2(Ampd2)
Ampd3	0.938632	0.036649	0.809526	-0.177271	0.999979	0.0929678	0.0241962	-0.651109	0.0170453	-0.727707	ENSRNOG00000018262	adenosine monophosphate deaminase 3(Ampd3)
Amt	0.461153	0.198858	0.134952	-0.484987	0.980362	-0.55969	0.000322105	-0.799805	0.367341	-0.246603	ENSRNOG00000050214	aminomethyltransferase(Amt)
Amz1	na	na	0.723626	-0.774954	0.781088	1.01472	0.820966	0.272506	0.439004	-0.889978	ENSRNOG00000024264	archaelysin family metallopeptidase 1(Amz1)
Amz2	0.213048	0.23683	0.370318	0.207785	0.566818	0.268018	2.21403e-09	0.732134	0.000513267	0.470964	ENSRNOG00000000246	archaelysin family metallopeptidase 2(Amz2)
Anapc1	0.437475	-0.110246	0.711316	-0.132572	0.999979	-0.0315323	0.0458708	-0.316171	0.0734072	-0.301801	ENSRNOG00000016965	anaphase promoting complex subunit 1(Anapc1)
Anapc10	0.637583	-0.0563833	0.5681	-0.136172	0.999979	0.111478	0.392391	-0.115858	0.0681738	-0.234219	ENSRNOG00000018296	anaphase promoting complex subunit 10(Anapc10)
Anapc11	0.132015	-0.210242	0.56126	0.123911	0.999979	-0.0605924	0.328873	0.116652	0.148097	0.17198	ENSRNOG00000036686	anaphase promoting complex subunit 11(Anapc11)
Anapc13	0.011745	-0.364006	0.895292	-0.0533408	0.999979	-0.169373	0.430295	-0.117551	0.681991	0.0700476	ENSRNOG00000008459	anaphase promoting complex subunit 13(Anapc13)
Anapc15	0.0259056	-0.403712	0.990494	0.0153093	0.999979	-0.102699	0.648668	0.112692	0.312664	0.235646	ENSRNOG00000019936	anaphase promoting complex subunit 15(Anapc15)
Anapc16	0.595002	-0.082133	0.677475	-0.10615	0.964172	0.1832	6.77208e-06	0.47221	0.0132889	0.292305	ENSRNOG00000000576	anaphase promoting complex subunit 16(Anapc16)
Anapc2	0.0186412	0.245954	0.574427	0.124345	0.999979	-0.0921735	0.992795	0.0014372	0.45179	0.100979	ENSRNOG00000011295	anaphase promoting complex subunit 2(Anapc2)
Anapc4	0.59501	-0.0710396	0.945063	-0.0270901	0.999979	0.0577534	0.0299515	-0.236177	0.0151412	-0.274458	ENSRNOG00000004130	anaphase promoting complex subunit 4(Anapc4)
Anapc5	0.050548	-0.16688	0.689141	-0.0912492	0.999979	0.0249299	0.000287236	-0.350759	0.000201218	-0.374963	ENSRNOG00000001316	anaphase-promoting complex subunit 5(Anapc5)
Anapc7	0.615098	-0.0827418	0.998089	-0.00271081	0.999979	0.0143526	0.500129	0.0924276	0.585353	0.0812732	ENSRNOG00000001283	anaphase promoting complex subunit 7(Anapc7)
Angel1	0.00953812	-0.48649	0.933596	-0.0657655	0.971867	-0.397058	0.0165362	-0.538849	0.662066	-0.128408	ENSRNOG00000010567	angel homolog 1(Angel1)
Angel2	0.0406469	0.235578	0.98336	0.0149897	0.696323	0.196432	0.680614	0.0717425	0.46138	-0.125522	ENSRNOG00000003795	angel homolog 2(Angel2)
Angptl6	0.0416238	-1.12586	0.963531	0.0918904	0.999979	0.0334705	0.930879	-0.0560218	0.903836	-0.0850782	ENSRNOG00000020603	angiopoietin-like 6(Angptl6)
Angptl7	na	na	0.933596	0.217856	0.999979	-0.368036	0.848151	0.188115	0.648546	0.436055	ENSRNOG00000009589	angiopoietin-related protein 7-like(LOC102552055)
Ankfy1	0.295417	0.155404	0.00222188	0.443516	0.217723	0.526392	1.31687e-16	0.963288	0.00134531	0.427926	ENSRNOG00000016212	ankyrin repeat and FYVE domain containing 1(Ankfy1)
Ankh	1.41979e-14	1.05733	0.444313	0.192925	0.999979	-0.0586626	0.160301	0.208427	0.0742184	0.26937	ENSRNOG00000010960	ANKH inorganic pyrophosphate transport regulator(Ankh)
Ankib1	0.00196583	0.435117	0.112347	0.345094	0.566748	0.317809	0.00849013	0.411222	0.604271	0.106213	ENSRNOG00000005502	ankyrin repeat and IBR domain containing 1(Ankib1)
Ankle2	0.145092	0.31852	0.57418	0.205134	0.999979	0.0985196	0.648305	0.102526	0.969363	0.0112593	ENSRNOG00000060144	ankyrin repeat and LEM domain containing 2(Ankle2)
Ankmy2	0.338527	0.142746	0.849912	-0.0683433	0.336717	0.261982	0.638612	-0.075563	0.011338	-0.344319	ENSRNOG00000005623	ankyrin repeat and MYND domain containing 2(Ankmy2)
Ankrd10	0.202138	0.187313	0.808153	-0.0835464	0.999979	-0.020766	0.115054	-0.220111	0.238243	-0.180498	ENSRNOG00000013618	ankyrin repeat domain 10(Ankrd10)
Ankrd11	0.00142657	0.392231	0.919484	0.0611084	0.999979	-0.286542	0.00186378	0.54295	5.50839e-06	0.797354	ENSRNOG00000027906	ankyrin repeat domain 11(Ankrd11)
Ankrd12	0.000574118	0.559336	0.747357	0.142279	0.999979	0.215043	0.00496548	0.506995	0.0927076	0.338716	ENSRNOG00000012733	ankyrin repeat domain 12(Ankrd12)
Ankrd13a	0.023003	-0.23518	0.554341	-0.15527	0.730293	-0.312589	0.0108205	-0.332186	0.984841	-0.00425641	ENSRNOG00000001204	ankyrin repeat domain 13a(Ankrd13a)
Ankrd13c	0.169754	0.177996	0.732795	0.0944855	0.999979	0.0867751	0.452924	0.102683	0.951559	0.0108644	ENSRNOG00000011340	ankyrin repeat domain 13C(Ankrd13c)
Ankrd13d	0.794412	-0.100364	0.976264	0.0487028	0.888784	-0.463491	1.68135e-05	-1.44176	0.00953416	-0.942562	ENSRNOG00000028247	ankyrin repeat domain 13D(Ankrd13d)
Ankrd16	0.0776317	0.430038	0.739138	0.148212	0.999979	-0.266392	0.876291	0.0393788	0.142731	0.304795	ENSRNOG00000028168	ankyrin repeat domain 16(Ankrd16)
Ankrd17	0.260849	-0.14426	0.959053	0.0282531	0.999979	0.0425105	0.634399	0.0801374	0.721717	0.0653185	ENSRNOG00000002940	ankyrin repeat domain 17(Ankrd17)
Ankrd23	0.940285	-0.0839755	0.841071	0.268995	0.999979	-0.226516	0.858624	-0.119092	0.857706	0.125893	ENSRNOG00000016151	ankyrin repeat domain 23(Ankrd23)
Ankrd24	0.00716007	-0.795854	0.937931	-0.0739878	0.999979	-0.506719	3.26305e-05	-1.09833	0.128861	-0.459723	ENSRNOG00000006759	ankyrin repeat domain 24(Ankrd24)
Ankrd26	0.32521	-0.184936	0.952272	-0.0499708	0.999979	-0.0599402	0.0348349	-0.457653	0.095586	-0.391359	ENSRNOG00000006717	ankyrin repeat domain 26(Ankrd26)
Ankrd27	0.901604	-0.021774	0.856373	-0.0707126	0.999979	-0.0128348	0.314534	-0.155534	0.386232	-0.14378	ENSRNOG00000052814	ankyrin repeat domain 27(Ankrd27)
Ankrd28	0.960385	-0.0174563	0.7109	0.132452	0.999979	0.122761	0.102445	-0.267855	0.0170343	-0.398286	ENSRNOG00000019697	ankyrin repeat domain 28(Ankrd28)
Ankrd33b	na	0.761438	0.510413	-1.04403	0.0248236	-2.63494	0.289092	-0.955992	0.0739135	1.45636	ENSRNOG00000010888	ankyrin repeat domain 33B(Ankrd33b)
Ankrd37	0.734357	-0.127015	0.645575	0.234181	0.999979	-0.231872	0.0460805	0.470676	0.00243604	0.712195	ENSRNOG00000031335	ankyrin repeat domain 37(Ankrd37)
Ankrd39	3.42038e-05	-0.616649	0.237884	-0.285118	0.999979	-0.166314	4.56619e-05	-0.607478	0.00637996	-0.444574	ENSRNOG00000023995	ankyrin repeat domain 39(Ankrd39)
Ankrd40	0.0522683	-0.350294	0.992795	0.0091298	0.999979	-0.000478359	0.929818	-0.0196402	0.915708	-0.0257686	ENSRNOG00000002935	ankyrin repeat domain 40(Ankrd40)
Ankrd42	0.0272944	0.46108	0.991194	-0.0111146	0.999979	-0.0155652	0.0815186	0.272834	0.0513054	0.316361	ENSRNOG00000009664	ankyrin repeat domain 42(Ankrd42)
Ankrd44	2.84125e-09	0.646183	0.867575	-0.111695	0.999979	0.0304549	0.0626187	-0.442538	0.0623221	-0.464943	ENSRNOG00000021384	ankyrin repeat domain 44(Ankrd44)
Ankrd46	0.792065	-0.0396674	0.262005	-0.199442	0.999979	-0.0658697	0.147282	-0.174901	0.41795	-0.11141	ENSRNOG00000025504	ankyrin repeat domain 46(Ankrd46)
Ankrd49	0.0513744	-0.214081	0.982722	0.0129843	0.996137	0.169534	0.106564	0.198494	0.869373	0.027672	ENSRNOG00000009233	ankyrin repeat domain 49(Ankrd49)
Ankrd50	0.0647983	0.515041	0.962186	-0.056669	0.999979	0.172561	0.463379	-0.248342	0.14981	-0.473197	ENSRNOG00000010534	ankyrin repeat domain 50(Ankrd50)
Ankrd52	0.525475	0.351609	0.476719	0.55642	0.874444	0.743688	0.166502	0.620473	0.855116	0.111394	ENSRNOG00000030597	ankyrin repeat domain 52(Ankrd52)
Ankrd53	na	na	0.977337	0.0853068	0.999979	-0.431655	0.892599	0.112527	0.522118	0.481118	ENSRNOG00000021402	-
Ankrd54	0.730807	0.128611	0.124554	0.497794	0.999979	-0.0493098	0.194387	0.327168	0.152377	0.375588	ENSRNOG00000010821	ankyrin repeat domain 54(Ankrd54)
Ankrd6	0.454404	0.348034	0.859067	-0.146975	0.920485	-0.323528	0.613162	-0.181533	0.716146	0.140512	ENSRNOG00000007110	ankyrin repeat domain 6(Ankrd6)
Ankrd9	0.23233	0.924224	0.822463	0.292665	0.999979	-0.260474	0.903913	-0.0816242	0.84216	0.140952	ENSRNOG00000008056	ankyrin repeat domain 9(Ankrd9)
Anks1a	0.693946	-0.186062	0.23503	0.461886	0.999979	-0.145985	0.149283	0.386928	0.0727163	0.490062	ENSRNOG00000000498	ankyrin repeat and sterile alpha motif domain containing 1A(Anks1a)
Anks3	0.000496235	0.455139	0.611238	0.16696	0.999979	-0.190346	0.818638	-0.0483229	0.517005	0.126554	ENSRNOG00000003186	ankyrin repeat and sterile alpha motif domain containing 3(Anks3)
Anks4b	0.224946	-0.72946	0.881019	-0.294344	0.999979	0.42054	0.990116	0.012277	0.345264	-0.755074	ENSRNOG00000046181	ankyrin repeat and sterile alpha motif domain containing 4B(Anks4b)
Anks6	0.310123	0.766752	0.830374	-0.42982	0.874154	-1.12941	0.00369578	-2.36013	0.301834	-0.924322	ENSRNOG00000023309	ankyrin repeat and sterile alpha motif domain containing 6(Anks6)
Ankzf1	0.00208112	0.339534	0.638948	0.112465	0.999979	0.0059875	0.751945	-0.0458681	0.71855	-0.0541444	ENSRNOG00000019052	ankyrin repeat and zinc finger domain containing 1(Ankzf1)
Anln	0.632954	-0.384357	0.86521	0.34124	0.708448	-1.00987	0.769904	-0.272128	0.551197	0.523602	ENSRNOG00000014343	anillin, actin binding protein(Anln)
Ano10	0.759886	0.0861007	0.115608	-0.53007	0.53412	-0.535616	0.0230056	-0.556211	0.985702	0.0071705	ENSRNOG00000000219	anoctamin 10(Ano10)
Ano6	0.0874834	0.306434	0.686983	0.18101	0.999979	0.270331	0.0363238	0.421938	0.288078	0.247365	ENSRNOG00000006995	anoctamin 6(Ano6)
Ano9	0.0365289	0.468253	0.926451	0.0734263	0.999979	-0.0957555	0.0968187	-0.402505	0.266802	-0.298877	ENSRNOG00000015830	anoctamin 9(Ano9)
Anp32a	3.03591e-07	-0.533688	0.000454761	-0.41273	0.999979	-0.18937	3.49525e-10	-0.635496	1.35524e-05	-0.475318	ENSRNOG00000014846	acidic nuclear phosphoprotein 32 family member A(NEWGENE_2116)
Anp32a	8.63097e-05	-0.404109	0.203737	-0.254287	0.661299	-0.287352	5.36245e-06	-0.570699	0.0367933	-0.298705	ENSRNOG00000058484	acidic nuclear phosphoprotein 32 family member A(Anp32a)
Anp32b	0.00798815	-0.30663	0.83317	-0.0855209	0.999979	-0.322225	1.11627e-05	-0.623353	0.110254	-0.266688	ENSRNOG00000009266	acidic nuclear phosphoprotein 32 family member B(Anp32b)
Anp32e	0.082664	-0.188145	0.0150885	0.520346	0.655662	0.644417	0.164589	-0.270838	3.99908e-07	-0.891895	ENSRNOG00000021168	acidic nuclear phosphoprotein 32 family member E(Anp32e)
Antkmt	0.772685	0.065613	0.984067	0.0149082	0.953702	-0.257434	0.00356846	-0.401293	0.368484	-0.150761	ENSRNOG00000019684	family with sequence similarity 173, member A(Fam173a)
Antxr2	0.23245	0.513432	0.901104	-0.119671	0.999979	-0.19485	0.355203	-0.316125	0.827388	-0.0928876	ENSRNOG00000000081	anthrax toxin receptor 2(Antxr2)
Anxa1	0.488058	0.205713	0.00104763	-1.39301	0.395807	-0.996016	4.79382e-06	-1.68973	0.148795	-0.62637	ENSRNOG00000017469	annexin A1(Anxa1)
Anxa11	0.800782	0.0292257	0.414318	-0.142197	0.999979	-0.0968242	1.68886e-05	-0.400903	0.00292288	-0.301756	ENSRNOG00000010984	annexin A11(Anxa11)
Anxa2	0.33982	0.214948	0.0214792	-0.814464	0.138303	-0.958671	0.216816	-0.391957	0.162389	0.455424	ENSRNOG00000010362	annexin A2(Anxa2)
Anxa4	0.484929	0.12579	0.00747501	-0.850202	0.370138	-0.529345	0.00275505	-0.809795	0.441754	-0.260424	ENSRNOG00000018159	annexin A4(Anxa4)
Anxa5	0.115232	-0.336728	4.20116e-07	-1.16317	0.428579	-0.75026	1.1236e-08	-1.23256	0.0375835	-0.513816	ENSRNOG00000014453	annexin A5(Anxa5)
Anxa6	0.0703816	0.177486	0.0002326	-0.30675	0.924547	-0.206155	1.04261e-07	-0.390071	0.0414673	-0.173195	ENSRNOG00000010668	annexin A6(Anxa6)
Anxa7	0.248478	-0.125895	0.690696	-0.0974518	0.999979	-0.170235	0.0219899	-0.249125	0.563618	-0.0796011	ENSRNOG00000007136	annexin A7(Anxa7)
Aoc3	0.00085432	1.65262	0.863034	0.165469	0.999979	-0.349193	0.497952	0.262925	0.086811	0.606047	ENSRNOG00000051307	amine oxidase, copper containing 3(Aoc3)
Ap1ar	0.367852	-0.148688	0.538385	-0.235662	0.999979	-0.0730107	0.0166214	-0.465155	0.0338906	-0.44016	ENSRNOG00000024492	adaptor-related protein complex 1 associated regulatory protein(Ap1ar)
Ap1b1	0.603025	-0.0889319	0.80098	0.126456	0.999979	0.125821	0.393611	-0.191183	0.270859	-0.25091	ENSRNOG00000008786	adaptor-related protein complex 1, beta 1 subunit(Ap1b1)
Ap1g2	0.348944	0.110006	0.999876	-0.000182502	0.999979	-0.161504	0.000134132	-0.315824	0.103727	-0.155715	ENSRNOG00000025619	adaptor-related protein complex 1, gamma 2 subunit(Ap1g2)
Ap1m1	5.80329e-10	-0.520677	0.00106054	-0.394246	0.766498	-0.309755	6.64918e-06	-0.469914	0.195023	-0.164382	ENSRNOG00000014454	adaptor-related protein complex 1, mu 1 subunit(Ap1m1)
Ap1s1	0.0056908	-0.316004	0.470823	-0.18408	0.623406	-0.299683	5.71786e-05	-0.526153	0.158847	-0.218766	ENSRNOG00000001415	adaptor-related protein complex 1, sigma 1 subunit(Ap1s1)
Ap1s2	0.953251	0.0254991	0.842228	0.132094	0.999979	0.173774	0.945428	0.022278	0.520558	-0.196412	ENSRNOG00000038686	adaptor-related protein complex 1, sigma 2 subunit(Ap1s2)
Ap1s3	0.195225	-0.139905	0.899495	-0.0702612	0.834268	0.373703	0.615576	0.109047	0.138095	-0.290867	ENSRNOG00000049873	adaptor related protein complex 1 sigma 3 subunit(Ap1s3)
Ap2a1	0.650329	0.239115	0.657267	0.352522	0.999979	0.208737	0.773997	0.13768	0.66529	0.207112	ENSRNOG00000026243	adaptor-related protein complex 2, alpha 1 subunit(Ap2a1)
Ap2a2	0.800782	-0.0505557	0.98919	0.0108976	0.999979	-0.00236054	0.362594	-0.135007	0.493274	-0.111218	ENSRNOG00000019534	adaptor-related protein complex 2, alpha 2 subunit(Ap2a2)
Ap2b1	0.853502	-0.0252464	0.973141	0.0190636	0.931882	0.14873	0.0010263	0.379346	0.0680494	0.236962	ENSRNOG00000061543	adaptor-related protein complex 2, beta 1 subunit(Ap2b1)
Ap2m1	0.272544	-0.112013	0.734285	-0.0648635	0.999979	0.0278818	0.124291	-0.131995	0.0862289	-0.152033	ENSRNOG00000001709	adaptor-related protein complex 2, mu 1 subunit(Ap2m1)
Ap2s1	0.0488759	-0.239874	0.998999	-0.0016218	0.999979	-0.124672	0.563815	-0.09346	0.909815	0.0221241	ENSRNOG00000015865	adaptor-related protein complex 2, sigma 1 subunit(Ap2s1)
Ap3b1	0.293759	0.151523	0.826995	0.0639006	0.999979	0.0948185	0.0528453	0.215532	0.341232	0.123423	ENSRNOG00000010624	adaptor-related protein complex 3, beta 1 subunit(Ap3b1)
Ap3d1	0.00295462	0.379133	0.750634	0.135446	0.929079	-0.387487	0.744307	0.0752273	0.0258312	0.415563	ENSRNOG00000018977	adaptor-related protein complex 3, delta 1 subunit(Ap3d1)
Ap3m1	0.158772	0.15931	0.95018	0.020968	0.924547	0.142121	0.00013856	0.313579	0.0631885	0.17471	ENSRNOG00000011461	adaptor-related protein complex 3, mu 1 subunit(Ap3m1)
Ap3m2	0.126896	0.311223	0.95679	0.0331164	0.999979	-0.0694794	0.00887206	0.39055	0.00319715	0.456036	ENSRNOG00000018650	adaptor-related protein complex 3, mu 2 subunit(Ap3m2)
Ap3s1	0.118906	0.222972	0.693929	-0.159045	0.999979	-0.0630205	0.221677	-0.237514	0.38594	-0.186679	ENSRNOG00000003829	adaptor-related protein complex 3, sigma 1 subunit(Ap3s1)
Ap3s2	0.0306372	-0.306557	0.883577	-0.0592521	0.816651	0.203929	0.013546	0.325835	0.490974	0.114325	ENSRNOG00000043141	adaptor-related protein complex 3, sigma 2 subunit(Ap3s2)
Ap4b1	4.35195e-10	0.681153	0.562799	0.189434	0.999979	0.246219	0.0114166	0.409466	0.386741	0.170291	ENSRNOG00000019455	adaptor-related protein complex 4, beta 1 subunit(Ap4b1)
Ap4e1	0.061641	0.459299	0.954783	0.087902	0.999979	0.314851	0.453822	0.337384	0.997365	-0.00185832	ENSRNOG00000022938	adaptor-related protein complex 4, epsilon 1 subunit(Ap4e1)
Ap4m1	0.995654	-0.00278417	0.479354	0.349909	0.999979	0.116924	0.0891077	0.467109	0.269742	0.34042	ENSRNOG00000001353	adaptor-related protein complex 4, mu 1 subunit(Ap4m1)
Ap4s1	0.985076	0.00937829	0.973015	0.0601188	0.82931	-0.526953	0.98601	-0.00966747	0.194182	0.54814	ENSRNOG00000005765	adaptor-related protein complex 4, sigma 1 subunit(Ap4s1)
Ap5b1	0.86833	-0.0723881	0.65501	0.290375	0.999979	0.445471	0.63569	0.174696	0.722494	-0.143454	ENSRNOG00000026114	adaptor-related protein complex 5, beta 1 subunit(Ap5b1)
Ap5m1	0.764817	0.0541286	0.97974	-0.0134454	0.643959	0.183454	0.00162637	0.336971	0.231504	0.152897	ENSRNOG00000014148	adaptor-related protein complex 5, mu 1 subunit(Ap5m1)
Ap5s1	0.903064	0.0363316	0.429455	0.230177	0.295643	0.40671	0.0171521	0.384922	0.943471	-0.0171976	ENSRNOG00000021249	adaptor-related protein complex 5, sigma 1 subunit(Ap5s1)
Apaf1	0.294127	0.157275	0.791342	0.0837154	0.999979	0.152892	0.0020714	0.367996	0.0860907	0.231531	ENSRNOG00000008022	apoptotic peptidase activating factor 1(Apaf1)
Apba3	0.847359	-0.0455101	0.771715	0.139823	0.999979	0.22228	0.595614	-0.127254	0.185982	-0.294087	ENSRNOG00000020466	amyloid beta precursor protein binding family A member 3(Apba3)
Apbb1	0.00105049	0.58164	0.519015	-0.274039	0.948663	-0.478062	2.12196e-11	-1.3556	0.000149515	-0.835072	ENSRNOG00000018020	amyloid beta precursor protein binding family B member 1(Apbb1)
Apbb1ip	0.00705565	0.283617	0.65252	-0.139952	0.999979	0.0919141	0.744064	-0.0604133	0.494436	-0.120882	ENSRNOG00000017803	amyloid beta precursor protein binding family B member 1 interacting protein(Apbb1ip)
Apbb2	0.848499	-0.0457732	0.47778	-0.16807	0.999979	0.0363181	0.484622	0.102379	0.711873	0.0625482	ENSRNOG00000025509	amyloid beta precursor protein binding family B member 2(Apbb2)
Apbb3	0.000291997	0.454963	0.262861	0.30709	0.999979	-0.0986154	0.0235866	0.397074	0.00596404	0.494567	ENSRNOG00000017849	amyloid beta precursor protein binding family B member 3(Apbb3)
Apc	0.287273	0.150155	0.779075	0.0920339	0.999979	-0.00373734	0.0222983	0.299482	0.0223342	0.314696	ENSRNOG00000020423	APC, WNT signaling pathway regulator(Apc)
Apcdd1l	0.73284	0.325046	0.538746	0.532969	0.999979	-0.349091	0.294443	0.506836	0.00797573	1.17467	ENSRNOG00000028440	APC down-regulated 1 like(Apcdd1l)
Apeh	0.711067	-0.0483799	0.945063	-0.0367396	0.999979	0.0383305	0.0168579	-0.347843	0.0134005	-0.376528	ENSRNOG00000029572	acylaminoacyl-peptide hydrolase(Apeh)
Apex1	7.90707e-07	-0.47925	0.603358	-0.156078	0.999979	-0.207664	1.31012e-08	-0.751112	0.000101893	-0.556633	ENSRNOG00000009663	apurinic/apyrimidinic endodeoxyribonuclease 1(Apex1)
Apex2	0.878113	-0.0369214	0.935325	-0.0332458	0.999979	0.0794753	0.868837	-0.0255017	0.512846	-0.0944292	ENSRNOG00000000166	apurinic/apyrimidinic endodeoxyribonuclease 2(Apex2)
Aph1a	0.225589	0.181202	0.779682	0.139437	0.999979	0.0208231	0.229435	0.260864	0.256408	0.262009	ENSRNOG00000023816	aph-1 homolog A, gamma secretase subunit(Aph1a)
Aph1b	0.555735	-0.128971	0.711031	-0.156221	0.951184	-0.219262	0.0124905	0.442929	0.000157072	0.669317	ENSRNOG00000027295	gamma-secretase subunit APH-1B-like(LOC108348064)
Api5	0.0979283	-0.147032	0.864351	-0.0745882	0.999979	0.288562	0.142557	-0.235734	0.000149515	-0.570013	ENSRNOG00000009689	apoptosis inhibitor 5(Api5)
Apip	0.19557	-0.26268	0.925306	-0.0533343	0.999979	-0.0609285	0.0844937	-0.296442	0.169758	-0.257295	ENSRNOG00000007446	APAF1 interacting protein(Apip)
Aplf	1.70719e-05	0.525981	0.941068	0.0303582	0.999979	-0.110818	0.70432	0.0552091	0.224783	0.158013	ENSRNOG00000043059	aprataxin and PNKP like factor(Aplf)
Aplp1	na	na	0.593595	-0.877161	0.999979	-0.427574	0.244832	-1.01013	0.522579	-0.624753	ENSRNOG00000020851	amyloid beta precursor like protein 1(Aplp1)
Aplp2	0.83145	0.0368836	0.998104	-0.0032717	0.851598	0.193173	0.3862	0.152425	0.855385	-0.0403852	ENSRNOG00000047179	amyloid beta precursor like protein 2(Aplp2)
Apmap	0.0703662	-0.221517	0.812876	-0.075042	0.999979	0.0546991	0.771427	-0.0466349	0.463412	-0.110166	ENSRNOG00000006795	adipocyte plasma membrane associated protein(Apmap)
Apobec2	0.163006	-0.450271	0.00544872	-0.95893	0.999979	-0.171268	0.0089978	-0.774261	0.0578984	-0.612878	ENSRNOG00000012303	apolipoprotein B mRNA editing enzyme catalytic subunit 2(Apobec2)
Apobec3	0.393509	-0.119984	0.835236	-0.0900748	0.999979	0.0156587	0.806559	0.0523916	0.938944	0.0180981	ENSRNOG00000016852	apolipoprotein B mRNA editing enzyme catalytic subunit 3B(Apobec3b)
Apobr	0.366297	-0.577191	0.899039	-0.259037	0.999979	-0.324917	0.024672	-1.55608	0.0724089	-1.33456	ENSRNOG00000017403	apolipoprotein B receptor(Apobr)
Apoe	0.0436795	0.754571	0.990198	-0.0282638	0.999979	-0.367558	0.75244	-0.146966	0.738268	0.16237	ENSRNOG00000018454	apolipoprotein E(Apoe)
Apol11a	na	na	8.69034e-20	3.86242	1.54717e-14	4.63436	9.21537e-21	3.91047	0.381395	-0.600598	ENSRNOG00000023122	apolipoprotein L 11a(Apol11a)
Apol3	0.61786	-0.069708	7.95325e-08	0.720478	5.69632e-05	0.975382	1.02496e-17	1.06523	0.737951	0.0642117	ENSRNOG00000042771	apolipoprotein L, 3(Apol3)
Apold1	na	0.0813784	0.504905	1.00374	0.999979	-0.0691182	0.562026	-0.5846	0.653545	-0.4904	ENSRNOG00000007830	apolipoprotein L domain containing 1(Apold1)
Apom	0.30322	0.726154	0.820378	0.216151	0.999979	0.0821857	0.00407534	0.949143	0.00940756	0.919172	ENSRNOG00000000850	apolipoprotein M(Apom)
Apoo	0.108768	-0.362377	0.654824	-0.221519	0.999979	-0.334949	0.0185947	-0.537021	0.31972	-0.266014	ENSRNOG00000046918	apolipoprotein O(Apoo)
Apool	0.000384129	-0.489367	0.230359	-0.324316	0.999979	-0.0862186	0.135505	-0.278872	0.185982	-0.264941	ENSRNOG00000004512	apolipoprotein O-like(Apool)
App	2.75984e-32	1.20888	0.728115	0.136379	0.999979	0.163618	0.320391	-0.187053	0.0343991	-0.376968	ENSRNOG00000006997	amyloid beta precursor protein(App)
Appbp2	0.00126425	0.282158	0.798243	0.0744449	0.999979	-0.0389868	0.402717	0.10927	0.265133	0.147192	ENSRNOG00000027654	amyloid beta precursor protein binding protein 2(Appbp2)
Appl1	0.0728175	0.19651	0.970999	-0.0167094	0.999979	0.0730942	0.170334	0.146837	0.566717	0.0730781	ENSRNOG00000013574	adaptor protein, phosphotyrosine interacting with PH domain and leucine zipper 1(Appl1)
Aprt	0.123684	-0.207888	0.965605	-0.0223352	0.999979	-0.105277	5.4558e-07	-0.568832	0.000220342	-0.45212	ENSRNOG00000014405	adenine phosphoribosyl transferase(Aprt)
Aptx	0.81323	0.0474877	0.992795	0.00871134	0.999979	0.053241	0.164862	0.210792	0.320356	0.166876	ENSRNOG00000006582	aprataxin(Aptx)
Aqr	0.465586	0.0910543	0.942579	0.0271374	0.802481	0.189827	0.88363	-0.02064	0.0680494	-0.206275	ENSRNOG00000008912	aquarius intron-binding spliceosomal factor(Aqr)
Ar	0.140368	1.01058	0.57121	0.572997	0.851598	0.823126	0.882469	0.10149	0.126595	-0.91919	ENSRNOG00000005639	androgen receptor(Ar)
Araf	0.363172	0.119005	0.616116	0.0775187	0.999979	0.0143988	0.410551	0.0690261	0.530921	0.0576109	ENSRNOG00000010838	A-Raf proto-oncogene, serine/threonine kinase(Araf)
Arap1	0.114705	0.326603	0.329821	0.34061	0.999979	0.156113	0.0149186	0.512447	0.0987463	0.383401	ENSRNOG00000019555	ArfGAP with RhoGAP domain, ankyrin repeat and PH domain 1(Arap1)
Arap2	0.430607	-0.270451	0.719219	0.480833	0.0161591	-1.81244	0.280763	0.687419	0.000139369	2.17347	ENSRNOG00000056826	ArfGAP with RhoGAP domain, ankyrin repeat and PH domain 2(Arap2)
Arc	na	-0.318689	0.799276	0.530078	0.999979	0.233802	0.902738	0.136865	0.850471	0.222734	ENSRNOG00000043465	activity-regulated cytoskeleton-associated protein(Arc)
Arcn1	0.894128	0.0157663	0.829269	-0.0596313	0.975448	0.220248	0.737375	-0.0451007	0.00833434	-0.283017	ENSRNOG00000061108	archain 1(Arcn1)
Arel1	0.0229698	0.244174	0.856085	0.0568924	0.999979	0.14164	0.00496548	0.302089	0.15977	0.173857	ENSRNOG00000004382	apoptosis resistant E3 ubiquitin protein ligase 1(Arel1)
Arf1	0.0880022	-0.166363	0.959134	-0.0268599	0.999979	0.0872736	0.652093	-0.0732244	0.299778	-0.157723	ENSRNOG00000060229	ADP-ribosylation factor 1(Arf1)
Arf2	0.383086	-0.131368	0.611238	-0.104696	0.999979	0.0579715	0.102595	0.164175	0.400549	0.0982087	ENSRNOG00000004807	ADP-ribosylation factor 2(Arf2)
Arf4	0.108451	-0.136357	0.87742	-0.0394734	0.999979	0.188917	0.60883	0.0545272	0.143328	-0.141564	ENSRNOG00000012623	ADP-ribosylation factor 4(Arf4)
Arf5	0.200284	0.187365	0.735827	0.104664	0.914758	-0.25569	0.993723	0.00147967	0.0736969	0.254587	ENSRNOG00000007806	ADP-ribosylation factor 5(Arf5)
Arf6	0.711939	-0.0999172	0.399331	-0.224092	0.0312711	-0.589005	0.384131	-0.150455	0.0054455	0.425419	ENSRNOG00000004791	ADP-ribosylation factor 6(Arf6)
Arfgap1	0.00237568	0.358556	0.0966556	0.276628	0.999979	-0.0277248	0.109445	0.207095	0.0979912	0.223406	ENSRNOG00000043150	ADP-ribosylation factor GTPase activating protein 1(Arfgap1)
Arfgap2	0.285896	0.105829	0.806541	0.0550879	0.999979	0.0657375	0.00425745	-0.243711	0.000373111	-0.310769	ENSRNOG00000014429	ADP-ribosylation factor GTPase activating protein 2(Arfgap2)
Arfgap3	0.407586	0.132632	0.117781	0.211084	0.485365	0.183099	0.00766532	0.255126	0.545849	0.0749334	ENSRNOG00000046472	ADP-ribosylation factor GTPase activating protein 3(Arfgap3)
Arfgef1	0.335576	-0.155454	0.637821	-0.141995	0.999979	0.0307696	0.978147	0.0053012	0.928049	-0.0182099	ENSRNOG00000005703	ADP ribosylation factor guanine nucleotide exchange factor 1(Arfgef1)
Arfgef2	0.00120219	0.380533	0.434207	0.210377	0.999979	0.255455	0.0130503	0.369032	0.380693	0.158278	ENSRNOG00000007485	ADP ribosylation factor guanine nucleotide exchange factor 2(Arfgef2)
Arfip1	0.730343	-0.0662877	0.768353	-0.0862375	0.999979	0.144305	0.519558	0.0903949	0.596871	-0.0807629	ENSRNOG00000010533	ADP-ribosylation factor interacting protein 1(Arfip1)
Arfip2	0.596568	-0.0799448	0.950981	0.032071	0.999979	-0.141886	0.398355	-0.129896	0.915476	0.0208297	ENSRNOG00000018440	ADP-ribosylation factor interacting protein 2(Arfip2)
Arfrp1	0.131776	-0.205955	0.996282	0.00305602	0.999979	0.0376461	0.477023	0.0709911	0.67462	0.047937	ENSRNOG00000013992	ADP-ribosylation factor related protein 1(Arfrp1)
Arg2	0.359387	0.594849	0.776298	-0.36824	0.999979	0.404139	0.926571	0.0641354	0.621785	-0.331944	ENSRNOG00000053811	arginase 2(Arg2)
Arglu1	0.821872	0.0416666	0.955571	0.0416931	0.999979	-0.162692	0.543258	-0.14019	0.591174	0.132021	ENSRNOG00000024142	arginine and glutamate rich 1(Arglu1)
Arhgap1	0.000696013	0.333312	0.637851	0.171797	0.999979	-0.234071	0.00582786	-0.458506	0.278243	-0.213812	ENSRNOG00000016610	Rho GTPase activating protein 1(Arhgap1)
Arhgap10	0.800782	0.107187	0.6554	-0.269517	0.999979	-0.190507	0.0178212	-0.663106	0.10507	-0.498212	ENSRNOG00000013152	Rho GTPase activating protein 10(Arhgap10)
Arhgap11a	0.529261	-0.349326	0.712468	-0.503732	0.999979	0.237475	0.0593593	-1.16107	0.073708	-1.16447	ENSRNOG00000008115	Rho GTPase activating protein 11A(Arhgap11a)
Arhgap12	8.90651e-05	0.453224	0.977337	-0.0122059	0.999979	0.069052	6.46472e-06	0.366408	0.000755098	0.296099	ENSRNOG00000017791	Rho GTPase activating protein 12(Arhgap12)
Arhgap15	0.0489972	0.274911	0.998999	0.00186104	0.999979	0.109053	0.157094	0.246576	0.363502	0.17723	ENSRNOG00000031168	Rho GTPase activating protein 15(Arhgap15)
Arhgap17	3.09388e-06	0.41689	0.143951	0.224169	0.886781	0.368328	1.98644e-07	0.517385	0.15737	0.172204	ENSRNOG00000013836	Rho GTPase activating protein 17(Arhgap17)
Arhgap18	0.090217	-0.510093	0.238929	-0.887282	0.999979	-0.377938	0.0415627	-1.01526	0.0839129	-0.923778	ENSRNOG00000011245	Rho GTPase activating protein 18(Arhgap18)
Arhgap19	0.227157	-0.541361	0.927976	0.139467	0.999979	0.0674045	0.616187	-0.277351	0.308049	-0.544564	ENSRNOG00000048166	Rho GTPase activating protein 19(Arhgap19)
Arhgap21	na	na	0.939546	-0.237653	0.999979	0.758722	0.401675	-0.859775	0.0905974	-1.76492	ENSRNOG00000008659	Rho GTPase activating protein 21(Arhgap21)
Arhgap25	1.5601e-06	0.503917	0.0594971	0.286703	0.30496	0.535408	7.49379e-08	0.58286	0.756065	0.0510696	ENSRNOG00000009347	Rho GTPase activating protein 25(Arhgap25)
Arhgap26	0.87404	-0.0635419	0.877955	-0.107265	0.999979	-0.253032	0.929595	0.0276297	0.371853	0.246506	ENSRNOG00000013920	Rho GTPase activating protein 26(Arhgap26)
Arhgap27	0.74437	0.126614	0.25706	0.500795	0.999979	0.109996	0.30134	0.32703	0.372851	0.302383	ENSRNOG00000028569	Rho GTPase activating protein 27(Arhgap27)
Arhgap30	0.0469719	0.183107	0.0517556	0.246101	0.999979	0.198678	0.925281	-0.0127311	0.0609502	-0.20166	ENSRNOG00000004192	Rho GTPase activating protein 30(Arhgap30)
Arhgap31	0.671653	-0.451679	0.700135	-0.661157	0.980362	-0.842058	0.0893834	-1.39784	0.622881	-0.47306	ENSRNOG00000003088	Rho GTPase activating protein 31(Arhgap31)
Arhgap35	0.388006	-0.278008	0.148696	0.401806	0.948663	-0.365448	0.170998	0.286707	0.000885067	0.647269	ENSRNOG00000015852	Rho GTPase activating protein 35(Arhgap35)
Arhgap39	0.692611	-0.348474	0.986212	0.0588333	0.999979	0.288654	0.504227	0.445508	0.98861	-0.0130517	ENSRNOG00000016566	Rho GTPase activating protein 39(Arhgap39)
Arhgap4	0.0251939	0.245402	0.66637	-0.155655	0.999979	-0.362829	1.17279e-05	-0.674269	0.090757	-0.302338	ENSRNOG00000058545	Rho GTPase activating protein 4(Arhgap4)
Arhgap45	2.56615e-12	0.68243	0.505861	0.302378	0.999979	0.123174	0.358008	0.248773	0.55828	0.177271	ENSRNOG00000013220	Rho GTPase activating protein 45(Arhgap45)
Arhgap5	0.898734	-0.0759157	0.999876	-0.000317638	0.999979	0.182359	0.799551	-0.154991	0.359425	-0.506885	ENSRNOG00000004696	Rho GTPase activating protein 5(Arhgap5)
Arhgap6	0.818529	0.191183	0.407683	-0.871761	0.999979	-0.345037	0.190327	-0.845509	0.459748	-0.537648	ENSRNOG00000003956	Rho GTPase activating protein 6(Arhgap6)
Arhgap9	0.438983	0.0882356	0.442849	-0.143905	0.999979	-0.0314513	0.000428452	-0.351328	0.00320062	-0.313791	ENSRNOG00000006946	Rho GTPase activating protein 9(Arhgap9)
Arhgdia	0.397145	-0.122832	0.762003	0.153999	0.999979	0.0356805	0.74596	-0.0883559	0.831091	-0.0636209	ENSRNOG00000036688	Rho GDP dissociation inhibitor alpha(Arhgdia)
Arhgdib	0.25687	0.127235	0.0322504	-0.258535	0.696323	-0.216044	0.00361071	-0.279235	0.649397	-0.0585238	ENSRNOG00000005809	Rho GDP dissociation inhibitor beta(Arhgdib)
Arhgef1	0.178272	0.429822	0.619129	0.246019	0.999979	-0.221488	0.964796	0.0141543	0.360235	0.255253	ENSRNOG00000020130	Rho guanine nucleotide exchange factor 1(Arhgef1)
Arhgef10	0.945083	0.0622866	0.941093	-0.116357	0.999979	-0.0202618	0.881112	-0.0874852	0.896773	-0.0813036	ENSRNOG00000012561	Rho guanine nucleotide exchange factor 10(Arhgef10)
Arhgef12	0.848262	-0.214519	0.930799	0.161089	0.912967	-0.507974	0.225048	0.673607	0.0316502	1.14581	ENSRNOG00000008924	Rho guanine nucleotide exchange factor 12(Arhgef12)
Arhgef18	0.000475718	0.657295	0.935684	0.0652914	0.980362	-0.424083	0.780341	0.0843876	0.0425974	0.494433	ENSRNOG00000028090	Rho/Rac guanine nucleotide exchange factor 18(Arhgef18)
Arhgef2	0.281168	0.190757	0.996282	0.00565972	0.999979	-0.235204	0.00195204	-0.493897	0.248823	-0.218951	ENSRNOG00000020027	Rho/Rac guanine nucleotide exchange factor 2(Arhgef2)
Arhgef3	6.66509e-05	0.283577	0.000871127	0.347581	0.00134848	0.548199	1.25538e-05	0.398144	0.155468	-0.155592	ENSRNOG00000014363	Rho guanine nucleotide exchange factor 3(Arhgef3)
Arhgef33	0.741996	0.273295	0.817211	-0.322619	0.999979	-0.355509	0.0812275	-1.00082	0.375018	-0.573229	ENSRNOG00000007061	Rho guanine nucleotide exchange factor 33(Arhgef33)
Arhgef39	5.34298e-06	0.814775	0.96388	-0.0354445	0.999979	-0.255324	0.000705685	-0.610134	0.0851603	-0.350525	ENSRNOG00000021433	Rho guanine nucleotide exchange factor 39(Arhgef39)
Arhgef4	0.966171	-0.0402533	0.932817	-0.191942	0.999979	-0.20486	0.0200914	-1.64845	0.08674	-1.29887	ENSRNOG00000014035	Rho guanine nucleotide exchange factor 4(Arhgef4)
Arhgef6	1.35443e-05	0.43616	0.133202	0.267942	0.0253217	0.542087	8.10462e-08	0.627977	0.556668	0.0952498	ENSRNOG00000000869	Rac/Cdc42 guanine nucleotide exchange factor 6(Arhgef6)
Arhgef7	0.188739	0.186353	0.147454	0.332616	0.999979	0.254562	0.00990789	0.411744	0.303951	0.195684	ENSRNOG00000012934	Rho guanine nucleotide exchange factor 7(Arhgef7)
Arhgef9	0.967322	-0.0342638	0.539117	0.482992	0.999979	0.313727	0.311413	-0.47116	0.107293	-0.757995	ENSRNOG00000007733	-
Arid1a	0.692067	-0.0544931	0.905024	0.051452	0.999979	-0.0466391	0.346655	0.143217	0.183194	0.203027	ENSRNOG00000006137	AT-rich interaction domain 1A(Arid1a)
Arid1b	0.868898	0.033762	0.731906	-0.132374	0.999979	0.0629978	0.62748	0.097921	0.881926	0.0345637	ENSRNOG00000017030	AT-rich interaction domain 1B(Arid1b)
Arid2	0.811787	0.048962	0.450179	0.183247	0.999979	0.107851	0.0239528	0.300826	0.193115	0.197216	ENSRNOG00000004831	AT-rich interaction domain 2(Arid2)
Arid3a	na	na	0.916024	0.254356	0.871535	0.866186	0.524213	0.5508	0.921221	0.106488	ENSRNOG00000026435	AT-rich interaction domain 3A(Arid3a)
Arid3b	0.149915	0.325693	0.345757	0.313159	0.999979	-0.249225	0.453806	0.17347	0.0454519	0.423455	ENSRNOG00000019677	AT-rich interaction domain 3B(Arid3b)
Arid4a	4.75355e-14	0.824567	0.686983	0.127754	0.999979	0.045588	0.157186	0.212495	0.314857	0.166834	ENSRNOG00000026239	AT-rich interaction domain 4A(Arid4a)
Arid4b	0.00170115	0.373801	0.429807	0.197571	0.999979	0.201019	0.0236373	0.319439	0.358306	0.154521	ENSRNOG00000016391	AT-rich interactive domain-containing protein 4B-like(LOC100912163)
Arid5a	3.42151e-07	0.801045	0.000871242	0.858589	0.999979	0.197092	7.55031e-05	0.899617	0.00425257	0.70519	ENSRNOG00000015382	AT-rich interaction domain 5A(Arid5a)
Arid5b	1.36982e-07	0.640029	1.14012e-14	0.848005	0.439464	0.624388	3.21127e-39	1.36222	1.91381e-10	0.726922	ENSRNOG00000000635	-
Arih1	0.182728	-0.202939	0.911915	-0.0567609	0.999979	0.0522514	0.816013	-0.0489627	0.63064	-0.098618	ENSRNOG00000009887	ariadne RBR E3 ubiquitin protein ligase 1(Arih1)
Arih2	0.232305	0.123285	0.429873	0.132466	0.936759	0.139297	0.0217662	0.216407	0.489972	0.0807646	ENSRNOG00000031827	ariadne RBR E3 ubiquitin protein ligase 2(Arih2)
Arl1	0.0238859	-0.25398	0.466917	-0.136343	0.999979	-0.0190671	0.626158	0.0610185	0.532487	0.0794845	ENSRNOG00000005763	ADP-ribosylation factor like GTPase 1(Arl1)
Arl10	0.551932	0.404743	0.933874	0.136814	0.999979	-0.0671249	0.867412	-0.105043	0.933692	-0.0568744	ENSRNOG00000045948	ADP-ribosylation factor like GTPase 10(Arl10)
Arl13b	0.483895	-0.174005	0.550383	-0.205788	0.999979	-0.04749	0.847483	0.043483	0.74899	0.0750121	ENSRNOG00000047194	ADP-ribosylation factor like GTPase 13B(Arl13b)
Arl14ep	0.117175	-0.210951	0.91394	-0.036307	0.999979	0.0822754	0.00461291	0.280014	0.0807266	0.192867	ENSRNOG00000004891	ADP-ribosylation factor like GTPase 14 effector protein(Arl14ep)
Arl15	0.823315	0.106271	0.999876	0.000358089	0.999979	-0.0552618	0.456682	0.203784	0.407116	0.236842	ENSRNOG00000011105	ADP-ribosylation factor like GTPase 15(Arl15)
Arl16	0.237325	-0.272664	0.849912	0.110101	0.999979	-0.162238	0.0535469	0.408685	0.01115	0.545755	ENSRNOG00000049235	ADP-ribosylation factor like GTPase 16(Arl16)
Arl2	0.0105927	-0.314652	0.943188	-0.0306392	0.68973	-0.25194	0.0153564	-0.288054	0.798683	-0.0426659	ENSRNOG00000021010	ADP-ribosylation factor like GTPase 2(Arl2)
Arl2bp	0.672341	-0.145489	0.45334	-0.38457	0.0306581	-0.778945	0.506768	-0.219098	0.0536915	0.56868	ENSRNOG00000016991	ADP-ribosylation factor like GTPase 2 binding protein(Arl2bp)
Arl3	3.71016e-05	-0.429881	0.999876	-0.000258641	0.999979	0.0992936	0.194596	-0.149202	0.0231233	-0.25673	ENSRNOG00000019973	ADP ribosylation factor like GTPase 3(Arl3)
Arl4a	0.711357	-0.0686578	0.348278	0.255178	0.120811	0.729263	2.94738e-07	0.764907	0.589502	0.113065	ENSRNOG00000004282	ADP-ribosylation factor like GTPase 4A(Arl4a)
Arl5a	0.821943	0.0759761	0.474948	-0.281768	0.983699	-0.277008	0.547952	-0.151964	0.625728	0.132388	ENSRNOG00000006839	ADP-ribosylation factor like GTPase 5A(Arl5a)
Arl5b	0.521111	0.0931782	0.40162	0.194758	0.923859	0.277797	2.16571e-06	0.586741	0.0278824	0.311336	ENSRNOG00000018714	ADP-ribosylation factor like GTPase 5B(Arl5b)
Arl5c	6.45286e-19	0.790963	0.655065	-0.148487	0.999979	-0.250518	0.124612	0.245813	0.00165933	0.482136	ENSRNOG00000036880	ADP-ribosylation factor like GTPase 5C(Arl5c)
Arl6	2.16377e-06	-0.694409	0.65953	-0.30306	0.999979	0.0530482	0.33863	-0.340018	0.137037	-0.524289	ENSRNOG00000001689	ADP-ribosylation factor like GTPase 6(Arl6)
Arl6ip1	0.502308	0.0674603	0.538746	-0.116407	0.999979	0.122307	0.914693	0.0140156	0.299778	-0.11688	ENSRNOG00000017751	ADP-ribosylation factor like GTPase 6 interacting protein 1(Arl6ip1)
Arl6ip4	0.0433406	-0.213313	0.996282	0.00334968	0.999979	-0.0787505	0.300592	-0.114102	0.813653	-0.0328951	ENSRNOG00000001080	ADP-ribosylation factor like GTPase 6 interacting protein 4(Arl6ip4)
Arl6ip5	8.23872e-05	0.332232	0.988763	0.0107583	0.443387	0.411304	2.21403e-09	0.627859	0.0481781	0.244385	ENSRNOG00000006818	ADP-ribosylation factor like GTPase 6 interacting protein 5(Arl6ip5)
Arl6ip6	0.17871	-0.183981	0.712468	-0.118371	0.999979	0.13271	0.392489	0.135339	0.922292	-0.0198028	ENSRNOG00000005074	ADP ribosylation factor like GTPase 6 interacting protein 6(Arl6ip6)
Arl8a	0.711939	0.151525	0.921284	-0.0945725	0.999979	-0.275153	0.567097	-0.196362	0.822859	0.0891239	ENSRNOG00000005988	ADP-ribosylation factor like GTPase 8A(Arl8a)
Arl8b	0.762313	-0.0353253	0.965007	0.0171645	0.47526	0.215107	0.0924705	0.162071	0.630354	-0.0580805	ENSRNOG00000055860	ADP-ribosylation factor like GTPase 8B(Arl8b)
Armc1	0.165027	-0.170161	0.841071	-0.068901	0.999979	0.0492782	0.876146	0.0263382	0.907921	-0.0210982	ENSRNOG00000013253	armadillo repeat containing 1(Armc1)
Armc10	0.670736	-0.0687555	0.100041	-0.248135	0.999979	-0.0165059	0.137277	-0.174149	0.166994	-0.172795	ENSRNOG00000012785	armadillo repeat containing 10(Armc10)
Armc3	na	na	0.542206	0.910465	0.317749	1.9096	0.201217	1.02518	0.50368	-0.726689	ENSRNOG00000016716	armadillo repeat containing 3(Armc3)
Armc5	0.502308	-0.188698	0.602906	0.344166	0.999979	0.444504	0.0799455	0.573772	0.44673	0.295196	ENSRNOG00000019935	armadillo repeat containing 5(Armc5)
Armc6	0.00614517	-0.548941	0.935325	-0.0560931	0.999979	-0.150679	0.0390696	-0.407763	0.241005	-0.262997	ENSRNOG00000020280	-
Armc7	0.000592121	0.513011	0.804848	0.0761033	0.999979	-0.117712	0.0185874	0.27811	0.00154152	0.379259	ENSRNOG00000042691	armadillo repeat containing 7(Armc7)
Armc8	0.8623	0.0257243	0.0220461	0.255135	0.024158	0.449583	1.35704e-11	0.561957	0.307288	0.111446	ENSRNOG00000014521	armadillo repeat containing 8(Armc8)
Armc9	0.465501	-0.14555	0.774663	-0.123502	0.999979	-0.0745591	0.0779541	-0.318525	0.178688	-0.266036	ENSRNOG00000025418	armadillo repeat containing 9(Armc9)
Armcx3	0.475892	-0.161795	0.301321	-0.273687	0.999979	-0.080719	0.843856	0.0423935	0.563911	0.118201	ENSRNOG00000025730	armadillo repeat containing, X-linked 3(Armcx3)
Armcx5	0.0986284	0.272406	0.849912	0.0834583	0.999979	0.249909	0.96898	-0.00849517	0.10133	-0.288083	ENSRNOG00000003187	armadillo repeat-containing X-linked protein 5-like(LOC102552920)
Armh3	0.770675	0.0534087	0.651922	0.113625	0.999979	-0.0302698	0.925553	0.0146617	0.771146	0.0466334	ENSRNOG00000025523	chromosome 1 open reading frame, human C10orf76(C1H10orf76)
Armt1	0.568685	0.100153	0.469028	-0.153861	0.953702	0.134369	0.327104	0.124907	0.923304	-0.0160271	ENSRNOG00000019489	acidic residue methyltransferase 1(Armt1)
Arnt	0.101217	0.22276	0.51481	0.156301	0.802481	0.275685	0.113621	0.206711	0.728046	-0.0592749	ENSRNOG00000031174	aryl hydrocarbon receptor nuclear translocator(Arnt)
Arntl	0.000710891	0.564071	0.399362	0.219541	0.590973	0.379245	1.2155e-05	0.607875	0.129075	0.252845	ENSRNOG00000014448	aryl hydrocarbon receptor nuclear translocator-like(Arntl)
Arpc1a	0.932923	0.012845	0.869245	0.0453496	0.901217	0.169612	0.490343	0.0766455	0.399344	-0.0961364	ENSRNOG00000000996	actin related protein 2/3 complex, subunit 1A(Arpc1a)
Arpc1b	0.00327364	0.231666	0.814977	-0.0426988	0.703732	-0.180115	1.21807e-11	-0.427963	0.000317246	-0.251597	ENSRNOG00000000991	actin related protein 2/3 complex, subunit 1B(Arpc1b)
Arpc2	1.63564e-07	0.358353	0.135933	-0.159398	0.763186	-0.136914	4.50789e-05	-0.293485	0.0658125	-0.151829	ENSRNOG00000014289	actin related protein 2/3 complex, subunit 2(Arpc2)
Arpc3	0.471002	-0.0813613	0.683948	-0.0648992	0.999979	-0.0332879	2.11635e-05	-0.284082	0.000375936	-0.253727	ENSRNOG00000008673	actin related protein 2/3 complex, subunit 3(Arpc3)
Arpc4	0.00077443	-0.25892	0.0579514	-0.173109	0.999979	-0.0940387	3.09348e-16	-0.519609	3.62979e-10	-0.424256	ENSRNOG00000008994	actin related protein 2/3 complex, subunit 4(Arpc4)
Arpc5	0.0155405	-0.225481	0.0027906	-0.452609	0.999979	-0.0517377	1.31452e-07	-0.666748	2.51119e-06	-0.627122	ENSRNOG00000028062	actin related protein 2/3 complex, subunit 5(Arpc5)
Arpc5l	0.199238	0.132544	0.952456	-0.029144	0.999979	0.0080924	0.00793351	-0.327774	0.0215675	-0.303041	ENSRNOG00000014317	actin related protein 2/3 complex, subunit 5-like(Arpc5l)
Arpp21	0.714631	-0.0816983	0.126256	-0.332183	0.38801	-0.427062	4.07906e-06	-0.673199	0.228897	-0.216447	ENSRNOG00000008919	cAMP regulated phosphoprotein 21(Arpp21)
Arrb1	0.298837	0.456527	0.96864	-0.0541625	0.999979	-0.166668	0.00609467	-0.876751	0.0488374	-0.684588	ENSRNOG00000030404	arrestin, beta 1(Arrb1)
Arrb2	4.71342e-08	0.448619	0.521302	-0.120883	0.999979	-0.237788	0.0278651	-0.216217	0.851966	0.0260923	ENSRNOG00000019308	arrestin, beta 2(Arrb2)
Arrdc1	0.985817	-0.00410957	0.362352	-0.251521	0.66506	-0.510692	4.26036e-09	-0.882663	0.0343075	-0.367874	ENSRNOG00000007622	arrestin domain containing 1(Arrdc1)
Arrdc2	5.09369e-13	0.806426	0.424145	0.333819	0.999979	-0.0551333	0.0020799	0.701819	0.00156306	0.752191	ENSRNOG00000019009	arrestin domain containing 2(Arrdc2)
Arrdc3	0.00287939	0.765254	0.930799	-0.069026	0.888784	-0.444696	0.000285187	0.75548	2.09114e-08	1.16055	ENSRNOG00000045649	arrestin domain containing 3(Arrdc3)
Arrdc4	na	na	0.41712	1.2501	0.550121	1.39305	0.00621364	2.28547	0.49951	0.755688	ENSRNOG00000010775	arrestin domain containing 4(Arrdc4)
Arsa	0.102912	0.497841	0.84224	0.280439	0.999979	0.228258	0.712435	-0.244907	0.427486	-0.501251	ENSRNOG00000012953	arylsulfatase A(Arsa)
Arsb	0.265704	-0.350161	0.913289	-0.0873385	0.993821	-0.347888	0.0581691	-0.481927	0.662443	-0.1409	ENSRNOG00000011150	arylsulfatase B(Arsb)
Arse	0.894563	-0.111931	0.934579	0.12003	0.999979	-0.305251	0.86965	-0.091168	0.622358	0.258907	ENSRNOG00000028350	arylsulfatase E(Arse)
Arsg	0.968454	-0.0403788	0.93062	0.187562	0.999979	0.00849604	0.471735	0.502894	0.570396	0.433289	ENSRNOG00000003931	arylsulfatase G(Arsg)
Arsk	0.0661606	0.301393	0.508986	0.220682	0.00846957	0.736656	0.000156922	0.620075	0.631912	-0.109854	ENSRNOG00000026937	arylsulfatase family, member K(Arsk)
Art2b	8.07201e-07	0.556738	0.992795	0.00537489	0.999979	0.14348	0.0742008	-0.174764	0.000663379	-0.323476	ENSRNOG00000019687	ADP-ribosyltransferase 2b(Art2b)
Art4	1.95603e-05	0.527986	0.379455	-0.312096	0.999979	0.0758677	0.291116	0.243645	0.380319	0.218411	ENSRNOG00000005670	ADP-ribosyltransferase 4(Art4)
Arv1	5.67493e-05	-0.442666	0.841085	0.0618842	0.999979	0.0406662	0.412558	0.106088	0.606805	0.0748282	ENSRNOG00000018909	ARV1 homolog, fatty acid homeostasis modulator(Arv1)
Arvcf	0.696326	0.285243	0.883756	-0.258232	0.999979	0.498345	0.822936	-0.174531	0.38128	-0.623115	ENSRNOG00000001888	armadillo repeat gene deleted in velo-cardio-facial syndrome(Arvcf)
As3mt	0.0394113	-0.466233	0.000170045	-0.998453	0.426094	-0.667773	2.04735e-07	-1.2282	0.0420263	-0.545259	ENSRNOG00000020081	arsenite methyltransferase(As3mt)
Asah1	0.0563792	0.336337	0.817834	-0.105105	0.936759	0.197164	0.171695	-0.254474	0.0133854	-0.452363	ENSRNOG00000010034	N-acylsphingosine amidohydrolase 1(Asah1)
Asap1	1.49854e-05	0.440873	0.421854	0.225637	0.999979	0.304474	8.89034e-07	0.721071	0.00683897	0.443401	ENSRNOG00000058733	ArfGAP with SH3 domain, ankyrin repeat and PH domain 1(Asap1)
Asap3	na	0.878874	0.945033	0.147615	0.999979	-0.339372	0.441468	-0.541468	0.828982	-0.1823	ENSRNOG00000049714	ArfGAP with SH3 domain, ankyrin repeat and PH domain 3(Asap3)
Asb1	0.583268	0.309835	0.98919	-0.0277104	0.999979	0.0179591	0.120766	0.492824	0.215111	0.430984	ENSRNOG00000020322	ankyrin repeat and SOCS box-containing 1(Asb1)
Asb13	0.0214465	0.330473	2.54509e-05	0.612194	0.239651	0.564089	2.3786e-08	0.733788	0.255438	0.190847	ENSRNOG00000017967	ankyrin repeat and SOCS box-containing 13(Asb13)
Asb2	0.0315572	-0.803736	1.8102e-05	-2.75821	0.181031	-2.85442	2.16358e-14	-5.61424	4.04797e-05	-2.56492	ENSRNOG00000051619	ankyrin repeat and SOCS box-containing 2(Asb2)
Asb3	0.565639	0.0952932	0.871129	-0.0592683	0.869315	0.219598	0.609662	0.0782223	0.354742	-0.138248	ENSRNOG00000032471	ankyrin repeat and SOCS box-containing 3(Asb3)
Asb5	0.835178	-0.182047	0.777898	-0.377073	0.999979	0.496586	0.746168	0.217532	0.712041	-0.263265	ENSRNOG00000042630	ankyrin repeat and SOCS box-containing 5(Asb5)
Asb6	0.674502	0.0721391	0.674374	0.172784	0.999979	0.00156627	0.86379	0.0429356	0.84663	0.051351	ENSRNOG00000024786	ankyrin repeat and SOCS box-containing 6(Asb6)
Asb7	0.352542	0.169511	0.777322	0.154946	0.981124	0.26318	0.4599	0.188584	0.801287	-0.0780455	ENSRNOG00000013795	ankyrin repeat and SOCS box-containing 7(Asb7)
Asb8	0.22848	0.135248	0.937783	-0.0255426	0.999979	0.100716	0.815911	-0.0285927	0.229327	-0.127018	ENSRNOG00000010099	ankyrin repeat and SOCS box-containing 8(Asb8)
Ascc1	0.00221427	-0.298968	0.728424	-0.0871188	0.999979	-0.108545	0.0098878	-0.272963	0.114096	-0.186894	ENSRNOG00000056647	activating signal cointegrator 1 complex subunit 1(Ascc1)
Ascc2	0.597804	-0.0887465	0.983619	0.0165912	0.999979	0.0993435	0.788735	0.0546182	0.835701	-0.0457938	ENSRNOG00000007349	activating signal cointegrator 1 complex subunit 2(Ascc2)
Ascc3	0.131914	0.216204	0.977337	0.0249442	0.762547	0.250986	0.057407	0.349782	0.596223	0.122126	ENSRNOG00000037604	activating signal cointegrator 1 complex subunit 3(Ascc3)
Ascl4	0.00427497	1.75336	0.57121	-0.51912	0.999979	-0.41383	0.00192353	-1.45869	0.0475352	-1.00557	ENSRNOG00000031493	achaete-scute family bHLH transcription factor 4(Ascl4)
Asf1a	0.867039	0.0272	0.86521	0.0648085	0.999979	-0.0486282	0.50244	0.104913	0.291677	0.163188	ENSRNOG00000000415	anti-silencing function 1A histone chaperone(Asf1a)
Asf1b	0.00281345	-0.41684	0.658829	-0.240453	na	0.0273121	0.000145078	-0.905492	6.30433e-05	-0.997622	ENSRNOG00000005115	anti-silencing function 1B histone chaperone(Asf1b)
Ash1l	0.000364984	0.386065	0.161866	0.364051	0.999979	0.235407	6.37055e-06	0.762071	0.00291059	0.549872	ENSRNOG00000020386	ASH1 like histone lysine methyltransferase(Ash1l)
Ash2l	0.197202	-0.134766	0.491028	-0.133521	0.999979	-0.119279	0.0124942	-0.255901	0.228496	-0.142931	ENSRNOG00000014875	ASH2 like histone lysine methyltransferase complex subunit(Ash2l)
Asic1	0.751856	0.163328	0.78362	0.234743	0.999979	-0.512622	0.0186274	-0.845593	0.55653	-0.259857	ENSRNOG00000059765	acid sensing ion channel subunit 1(Asic1)
Asl	5.00595e-10	-0.800326	0.000710406	-0.488418	0.999979	-0.104122	0.000154749	-0.482519	0.00399938	-0.396425	ENSRNOG00000000903	argininosuccinate lyase(Asl)
Asmtl	0.833034	-0.0669519	0.693684	0.181226	0.999979	-0.156947	0.964802	-0.0122915	0.531577	0.15981	ENSRNOG00000028166	acetylserotonin O-methyltransferase-like(Asmtl)
Asns	0.173134	-0.178819	8.63683e-33	1.52856	1.34089e-06	1.55358	1.94091e-35	1.57804	0.987663	-0.00361986	ENSRNOG00000007546	asparagine synthetase (glutamine-hydrolyzing)(Asns)
Asnsd1	0.000899451	-0.324887	0.782148	-0.115579	0.999979	0.204609	0.974769	0.00741641	0.199036	-0.24478	ENSRNOG00000003942	asparagine synthetase domain containing 1(Asnsd1)
Asph	0.0345286	-0.646203	0.83144	-0.204326	0.999979	0.102455	0.147482	-0.55922	0.0486694	-0.7914	ENSRNOG00000007445	aspartate-beta-hydroxylase(Asph)
Aspm	0.997444	0.00364899	0.457766	-0.833937	0.999979	-0.136223	0.0468163	-1.26285	0.0628118	-1.25798	ENSRNOG00000012318	abnormal spindle microtubule assembly(Aspm)
Aspscr1	0.150814	0.188491	0.888842	0.0508292	0.999659	-0.290661	0.230752	0.152614	0.000134948	0.440852	ENSRNOG00000036678	ASPSCR1, UBX domain containing tether for SLC2A4(Aspscr1)
Aste1	0.19574	0.23822	0.798965	0.0832013	0.999979	0.131361	0.00806271	0.326458	0.152772	0.202521	ENSRNOG00000013059	asteroid homolog 1 (Drosophila)(Aste1)
Asxl1	0.811886	0.0455433	0.427264	0.204368	0.999979	-0.0311214	0.792289	-0.0507434	0.942915	-0.0153513	ENSRNOG00000061603	additional sex combs like 1, transcriptional regulator(Asxl1)
Asxl2	0.343511	0.201086	0.0613907	0.33519	0.999979	0.103847	0.0214923	0.318121	0.119121	0.239872	ENSRNOG00000011908	additional sex combs like 2, transcriptional regulator(Asxl2)
Atad1	0.719474	0.0467894	0.00738953	0.58715	1.09329e-06	1.08046	1.16895e-11	1.17673	0.818653	0.0628376	ENSRNOG00000010861	ATPase family, AAA domain containing 1(Atad1)
Atad2	0.394547	0.142882	0.771715	-0.128294	0.999979	-0.0629085	0.206666	-0.244801	0.367576	-0.193009	ENSRNOG00000025604	ATPase family, AAA domain containing 2(Atad2)
Atad2b	6.89133e-06	0.654018	0.493336	0.503408	0.999979	-0.101989	0.041545	0.809644	0.0407684	0.8531	ENSRNOG00000058973	ATPase family, AAA domain containing 2B(Atad2b)
Atad3a	3.28412e-05	-0.45041	0.995452	0.00577806	0.999979	-0.213537	0.000784034	-0.486846	0.159029	-0.238249	ENSRNOG00000018118	ATPase family, AAA domain containing 3A(Atad3a)
Atad5	0.124933	-0.335148	0.998999	0.00413627	0.999979	0.0556888	0.935834	0.0280308	0.915708	0.0398294	ENSRNOG00000021903	ATPase family, AAA domain containing 5(Atad5)
Atat1	0.00191272	0.503313	0.98919	-0.0148559	0.999979	-0.151712	0.0102401	-0.441274	0.109738	-0.305539	ENSRNOG00000000809	alpha tubulin acetyltransferase 1(Atat1)
Atcay	0.241643	0.40909	0.554072	-0.526563	0.975644	-0.52823	0.020161	-1.04605	0.387842	-0.460365	ENSRNOG00000020407	ATCAY, caytaxin(Atcay)
Ate1	0.161016	0.200262	0.976168	0.0211335	0.938425	0.171006	0.575274	0.0991854	0.753332	-0.0632039	ENSRNOG00000024414	arginyltransferase 1(Ate1)
Atf1	0.761881	0.0424628	0.942081	0.0241001	0.999979	-0.060138	0.680219	0.0477509	0.336363	0.104628	ENSRNOG00000061088	activating transcription factor 1(Atf1)
Atf2	0.0243804	0.315234	0.97974	-0.0161615	0.762547	0.25363	0.018715	0.313502	0.738943	0.0611347	ENSRNOG00000001597	activating transcription factor 2(Atf2)
Atf3	na	na	0.0217006	2.21718	0.999979	1.04759	1.2082e-06	3.475	0.00586289	2.26933	ENSRNOG00000003745	activating transcription factor 3(Atf3)
Atf4	0.0606145	0.216148	0.121639	0.271101	0.999979	0.0822447	3.22221e-09	0.683144	2.77321e-06	0.576293	ENSRNOG00000017801	activating transcription factor 4(Atf4)
Atf5	0.962011	-0.0484508	0.802351	0.31498	0.945698	0.658836	0.686603	0.248417	0.51271	-0.420003	ENSRNOG00000020060	activating transcription factor 5(Atf5)
Atf6	0.155312	-0.274472	0.808779	0.109216	0.999979	0.172078	0.000417703	0.576692	0.0212642	0.416656	ENSRNOG00000024632	activating transcription factor 6(Atf6)
Atf6b	0.677917	0.0912241	0.196294	0.510973	0.999979	0.127862	0.56216	0.18762	0.578042	0.189589	ENSRNOG00000000431	activating transcription factor 6 beta(Atf6b)
Atf7	0.357372	0.208111	0.147454	0.369271	0.999979	0.0937781	0.000212936	0.626341	0.00179114	0.564171	ENSRNOG00000015269	activating transcription factor 7(Atf7)
Atf7ip	0.0152031	0.265465	0.750634	0.10462	0.279788	0.422721	0.0106105	0.346238	0.771236	-0.0553552	ENSRNOG00000008870	activating transcription factor 7 interacting protein(Atf7ip)
Atg10	0.730162	0.084138	0.796124	0.114038	0.985613	0.170601	0.101961	-0.299052	0.0103204	-0.470319	ENSRNOG00000016342	autophagy related 10(Atg10)
Atg101	0.954973	0.00901599	0.998041	-0.003243	0.999979	0.045965	0.338674	0.146899	0.591004	0.0940985	ENSRNOG00000007756	autophagy related 101(Atg101)
Atg12	0.000170327	0.404081	0.879702	-0.0645375	0.999979	0.216266	0.0145147	0.348376	0.415198	0.141685	ENSRNOG00000000157	autophagy related 12(Atg12)
Atg13	0.0216452	0.526307	0.611238	0.20995	0.999979	0.166262	0.00028821	0.666852	0.0056533	0.551943	ENSRNOG00000016984	autophagy related 13(Atg13)
Atg14	2.55034e-05	0.644515	0.159637	0.284165	0.816651	0.448296	9.41017e-06	0.574458	0.369144	0.151487	ENSRNOG00000011873	autophagy related 14(Atg14)
Atg16l1	0.0072182	0.306047	0.0621724	0.319472	0.999979	0.0196013	0.448603	0.117172	0.588107	0.0925181	ENSRNOG00000017913	autophagy related 16-like 1(Atg16l1)
Atg16l2	0.0316322	0.383935	0.986212	-0.0144237	0.629134	-0.477782	0.831056	0.0401571	0.000430462	0.488642	ENSRNOG00000019413	autophagy related 16-like 2(Atg16l2)
Atg2a	0.166581	0.291758	0.208328	0.467845	0.999979	-0.177137	0.163329	0.369391	0.0380532	0.546703	ENSRNOG00000060707	autophagy related 2A(Atg2a)
Atg2b	0.0151123	0.314809	0.654824	0.129504	0.999979	-0.0858147	0.210517	0.179066	0.0532065	0.274002	ENSRNOG00000004519	autophagy related 2B(Atg2b)
Atg3	0.186091	0.139333	0.89043	0.0587872	0.999979	-0.0586138	0.604947	0.0881663	0.307649	0.165653	ENSRNOG00000002094	autophagy related 3(Atg3)
Atg4b	0.880559	-0.025654	0.849414	0.0599598	0.999979	-0.0995593	0.865815	0.0257278	0.372851	0.120635	ENSRNOG00000018403	autophagy related 4B, cysteine peptidase(Atg4b)
Atg4c	0.434422	0.151275	0.44992	-0.334821	0.999979	0.0589086	0.320149	-0.272735	0.159255	-0.387786	ENSRNOG00000008767	autophagy related 4C, cysteine peptidase(Atg4c)
Atg4d	0.108248	0.23334	0.895616	0.06544	0.999979	-0.25316	0.678986	0.0829527	0.0561354	0.32569	ENSRNOG00000047625	autophagy related 4D, cysteine peptidase(Atg4d)
Atg5	0.376521	-0.116473	0.803477	0.0675901	0.999979	0.0496664	0.00224154	0.308876	0.0247451	0.248142	ENSRNOG00000000322	-
Atg7	0.855383	0.0308933	0.909251	-0.0435703	0.999979	-0.19426	0.665446	-0.0635049	0.273525	0.148612	ENSRNOG00000007486	autophagy related 7(Atg7)
Atg9a	0.044413	0.549558	0.262462	0.527259	0.999979	0.313019	0.362314	0.311327	0.75765	0.129066	ENSRNOG00000018975	autophagy related 9A(Atg9a)
Atic	1.58929e-06	-0.400937	0.76364	-0.0887578	0.999979	-0.123638	0.000538061	-0.404761	0.0263907	-0.285932	ENSRNOG00000015511	5-aminoimidazole-4-carboxamide ribonucleotide formyltransferase/IMP cyclohydrolase(Atic)
Atl2	0.677034	-0.0787586	0.008177	-0.450665	0.931882	-0.232019	0.181104	-0.213462	0.835409	0.0441444	ENSRNOG00000006523	atlastin GTPase 2(Atl2)
Atl3	0.85623	0.0480024	0.0793912	0.332366	0.580769	0.328799	0.142096	0.223233	0.64314	-0.0880238	ENSRNOG00000021203	atlastin GTPase 3(Atl3)
Atm	0.386554	0.181782	0.990665	0.0157562	0.999979	-0.0325652	0.627275	0.127298	0.424104	0.20508	ENSRNOG00000029773	ATM serine/threonine kinase(Atm)
Atn1	0.449929	-0.199014	0.647879	0.228181	0.999979	0.194265	0.364694	0.236222	0.847009	0.06373	ENSRNOG00000049575	atrophin-1-like(LOC100911672)
Atox1	0.08399	-0.28916	0.485087	-0.238712	0.999979	-0.184281	0.0929539	-0.319747	0.567422	-0.13251	ENSRNOG00000013118	antioxidant 1 copper chaperone(Atox1)
Atp10a	0.489885	0.482329	0.849928	-0.222342	0.999979	0.0131694	0.605921	-0.267857	0.631912	-0.264527	ENSRNOG00000056228	ATPase phospholipid transporting 10A (putative)(Atp10a)
Atp10d	0.168261	-1.01298	0.992596	0.0398351	0.999979	-0.138811	0.710447	-0.306021	0.738159	-0.295063	ENSRNOG00000002312	ATPase phospholipid transporting 10D (putative)(Atp10d)
Atp11a	0.475878	-0.202938	0.98521	0.0247901	0.999979	0.0757142	0.608761	-0.150977	0.47627	-0.211457	ENSRNOG00000017154	ATPase phospholipid transporting 11A(Atp11a)
Atp11b	0.0222019	0.285264	0.772895	-0.139106	0.999979	0.138462	0.388895	-0.191729	0.152532	-0.312345	ENSRNOG00000052116	ATPase phospholipid transporting 11B (putative)(Atp11b)
Atp11c	0.925125	0.028508	0.915083	0.0517312	0.841682	0.236667	0.879605	0.0300821	0.274696	-0.189333	ENSRNOG00000003472	ATPase phospholipid transporting 11C(Atp11c)
Atp13a1	0.0257523	0.274289	0.00258603	0.758762	0.999979	0.267127	0.00576933	0.6203	0.176364	0.350487	ENSRNOG00000010776	ATPase 13A1(Atp13a1)
Atp13a2	0.577963	0.217247	0.465026	0.402898	0.999979	0.304863	0.091862	0.524079	0.297112	0.364613	ENSRNOG00000008052	ATPase 13A2(Atp13a2)
Atp1a1	0.584517	-0.100302	0.238811	-0.231864	0.548441	-0.470055	8.15088e-11	-0.756406	0.0616769	-0.258426	ENSRNOG00000030019	ATPase Na+/K+ transporting subunit alpha 1(Atp1a1)
Atp1a4	na	na	0.849722	0.453567	0.999979	-0.155382	0.604055	0.542707	0.378232	0.888589	ENSRNOG00000032378	ATPase Na+/K+ transporting subunit alpha 4(Atp1a4)
Atp1b1	0.196889	-0.472361	8.86788e-05	-1.28812	0.0977552	-1.42584	0.0013065	-0.966651	0.269633	0.373389	ENSRNOG00000002934	ATPase Na+/K+ transporting subunit beta 1(Atp1b1)
Atp1b2	na	na	0.96864	-0.167299	0.999979	0.469546	0.986841	-0.0230956	0.76079	-0.411958	ENSRNOG00000011227	ATPase Na+/K+ transporting subunit beta 2(Atp1b2)
Atp1b3	0.222	0.131603	6.38454e-05	-0.377871	0.111663	-0.406799	2.9592e-08	-0.471085	0.531343	-0.0729084	ENSRNOG00000011501	ATPase Na+/K+ transporting subunit beta 3(Atp1b3)
Atp23	0.484221	-0.291754	0.995185	0.0145577	0.802481	-0.488464	0.403032	-0.35921	0.748322	0.163353	ENSRNOG00000045629	ATP23 metallopeptidase and ATP synthase assembly factor homolog(Atp23)
Atp2a2	0.510411	-0.0887142	0.811443	0.0905468	0.999979	0.0397047	0.920771	-0.0198214	0.812182	-0.0491987	ENSRNOG00000001285	ATPase sarcoplasmic/endoplasmic reticulum Ca2+ transporting 2(Atp2a2)
Atp2a3	0.266463	0.276623	0.902145	-0.108949	0.999979	0.0261273	0.000769604	-0.907293	0.0103004	-0.74609	ENSRNOG00000017912	ATPase sarcoplasmic/endoplasmic reticulum Ca2+ transporting 3(Atp2a3)
Atp2b1	0.931681	0.0146091	0.970327	-0.0177658	0.997128	-0.120989	0.83592	-0.029113	0.43756	0.0995799	ENSRNOG00000004026	ATPase plasma membrane Ca2+ transporting 1(Atp2b1)
Atp2b4	0.00126425	0.676235	0.0461768	-0.563497	0.999659	-0.235769	0.105722	-0.377517	0.644166	-0.133909	ENSRNOG00000003031	ATPase plasma membrane Ca2+ transporting 4(Atp2b4)
Atp2c1	0.00949186	0.315623	0.843836	-0.0755512	0.999979	0.026426	0.295801	-0.162461	0.198552	-0.204472	ENSRNOG00000013305	ATPase secretory pathway Ca2+ transporting 1(Atp2c1)
Atp5f1a	2.27508e-06	-0.374535	0.336961	-0.178976	0.999979	-0.0496933	3.00396e-06	-0.49015	6.18984e-05	-0.446873	ENSRNOG00000017032	ATP synthase, H+ transporting, mitochondrial F1 complex, alpha subunit 1, cardiac muscle(Atp5a1)
Atp5f1b	3.17357e-05	-0.432228	0.896148	-0.0596958	0.999979	-0.0250868	0.000503532	-0.486431	0.00234631	-0.451948	ENSRNOG00000002840	ATP synthase, H+ transporting, mitochondrial F1 complex, beta polypeptide(Atp5b)
Atp5f1c	3.54381e-08	-0.383466	0.104184	-0.192617	0.999979	-0.117305	4.68372e-08	-0.437899	0.000234064	-0.320125	ENSRNOG00000019223	TATA-box binding protein associated factor 3(Taf3)
Atp5f1d	0.00480257	-0.351541	0.983601	0.0162264	0.999979	-0.0821447	0.0485837	-0.30355	0.214073	-0.214316	ENSRNOG00000014625	ATP synthase, H+ transporting, mitochondrial F1 complex, delta subunit(Atp5d)
Atp5f1e	0.000438907	-0.378242	0.348411	-0.242749	0.980362	-0.271376	0.000541523	-0.515282	0.178635	-0.236612	ENSRNOG00000049912	ATP synthase, H+ transporting, mitochondrial F1 complex, epsilon subunit(Atp5e)
Atp5if1	4.71052e-05	-0.337961	0.682695	-0.133482	0.999979	-0.150441	0.735513	-0.0640576	0.424813	0.141478	ENSRNOG00000013300	ATPase inhibitory factor 1(Atpif1)
Atp5mc1	2.19563e-17	-0.628045	0.0384873	-0.243279	0.999979	-0.152729	1.1312e-13	-0.630839	5.81429e-07	-0.457674	ENSRNOG00000007235	ATP synthase, H+ transporting, mitochondrial Fo complex, subunit C1 (subunit 9)(Atp5g1)
Atp5mc2	0.000291997	-0.423075	0.98919	0.0116643	0.999979	-0.0645756	0.0230769	-0.312029	0.0939562	-0.25093	ENSRNOG00000015320	ATP synthase, H+ transporting, mitochondrial Fo complex, subunit C2 (subunit 9)(Atp5g2)
Atp5mc3	3.04186e-09	-0.550407	0.699772	-0.118508	0.999979	-0.157856	2.7348e-06	-0.590004	0.00168187	-0.430176	ENSRNOG00000001596	ATP synthase, H+ transporting, mitochondrial Fo complex, subunit C3 (subunit 9)(Atp5g3)
Atp5md	0.297473	-0.342169	0.605651	-0.254739	0.999979	0.00400122	0.461589	-0.199289	0.405311	-0.237549	ENSRNOG00000042869	up-regulated during skeletal muscle growth protein 5(LOC103693430)
Atp5me	0.150987	-0.257655	0.369049	-0.295314	0.999979	-0.0798835	0.00479298	-0.536192	0.0539587	-0.403307	ENSRNOG00000000064	ATP synthase, H+ transporting, mitochondrial Fo complex, subunit E(Atp5i)
Atp5mf	0.00100253	-0.348698	0.089626	-0.24083	0.999979	-0.164327	0.002157	-0.315352	0.251636	-0.140804	ENSRNOG00000027049	ATP synthase, H+ transporting, mitochondrial Fo complex, subunit F2(Atp5j2)
Atp5mg	6.12442e-10	-0.497046	0.00954231	-0.276199	0.999979	-0.106669	0.0109719	-0.232827	0.225538	-0.128725	ENSRNOG00000028884	ATP synthase, H+ transporting, mitochondrial Fo complex, subunit G(Atp5l)
Atp5pb	3.73285e-06	-0.370438	0.251956	-0.141521	0.999979	-0.00166622	0.00146736	-0.244817	0.0011696	-0.261373	ENSRNOG00000016000	ATP synthase subunit b, mitochondrial-like(LOC100911417)
Atp5pd	0.000338799	-0.345656	0.524368	-0.114178	0.999979	-0.0251942	0.0243482	-0.20964	0.056805	-0.190472	ENSRNOG00000003626	ATP synthase, H+ transporting, mitochondrial Fo complex, subunit d(Atp5h)
Atp5pf	2.7003e-06	-0.414035	0.359099	-0.189721	0.999979	-0.181433	0.00158425	-0.37572	0.186741	-0.183998	ENSRNOG00000001551	ATP synthase, H+ transporting, mitochondrial Fo complex, subunit F6(Atp5j)
Atp5po	7.21767e-11	-0.485233	0.0464327	-0.228963	0.999979	-0.0819503	2.5314e-05	-0.36046	0.00252175	-0.280648	ENSRNOG00000001991	ATP synthase, H+ transporting, mitochondrial F1 complex, O subunit(Atp5o)
Atp6ap1	0.0816282	0.179399	0.663007	-0.103305	0.999979	0.0572382	0.614198	-0.0674226	0.318369	-0.127262	ENSRNOG00000054352	ATPase H+ transporting accessory protein 1(Atp6ap1)
Atp6ap2	0.897606	0.0202344	0.185344	-0.230167	0.999979	0.133663	0.00694107	0.311815	0.213989	0.167485	ENSRNOG00000003858	ATPase H+ transporting accessory protein 2(Atp6ap2)
Atp6v0a1	0.119521	-0.624257	0.63246	-0.421524	0.762547	-0.688977	0.193522	0.550143	0.00438342	1.1321	ENSRNOG00000036814	ATPase H+ transporting V0 subunit a1(Atp6v0a1)
Atp6v0a2	0.114489	0.177379	0.877955	0.0445047	0.999979	0.0614773	0.00388165	0.273792	0.0314148	0.222112	ENSRNOG00000052704	ATPase H+ transporting V0 subunit a2(Atp6v0a2)
Atp6v0b	0.178566	-0.146084	0.457147	-0.115942	0.999979	-0.0844363	4.2485e-05	0.324815	3.87431e-07	0.41313	ENSRNOG00000019655	-
Atp6v0c	0.984726	0.00282307	0.433759	0.163786	0.999659	0.118122	0.000488868	0.390806	0.028336	0.271497	ENSRNOG00000006542	ATPase H+ transporting V0 subunit C(Atp6v0c)
Atp6v0d1	0.0190647	0.217474	0.50147	0.108341	0.635366	0.213177	0.012969	0.209029	0.99633	-0.000586973	ENSRNOG00000017235	ATPase H+ transporting V0 subunit D1(Atp6v0d1)
Atp6v0e1	0.790451	-0.0383379	0.990447	0.00550699	0.999979	0.0623218	0.799551	0.0240168	0.74899	-0.0314159	ENSRNOG00000003269	ATPase H+ transporting V0 subunit e1(Atp6v0e1)
Atp6v0e2	0.0460029	0.322156	0.673639	-0.12085	0.988646	-0.181209	0.836258	-0.0352465	0.310494	0.15175	ENSRNOG00000008218	ATPase, H+ transporting V0 subunit e2(Atp6v0e2)
Atp6v1a	0.250667	-0.131452	0.778501	-0.108513	0.927346	0.247285	0.430203	-0.141497	0.0088313	-0.421143	ENSRNOG00000001992	ATPase H+ transporting V1 subunit A(Atp6v1a)
Atp6v1b2	0.321836	-0.117461	0.588321	-0.129024	0.999979	0.0500855	0.197631	-0.161546	0.0645998	-0.232059	ENSRNOG00000011891	ATPase H+ transporting V1 subunit B2(Atp6v1b2)
Atp6v1c1	0.314232	-0.106721	0.174197	-0.143004	0.999979	0.00435612	0.0596632	-0.139618	0.07044	-0.141794	ENSRNOG00000004846	ATPase H+ transporting V1 subunit C1(Atp6v1c1)
Atp6v1c2	0.448739	0.436047	0.984067	0.0395165	0.999979	0.418533	0.0739632	0.661049	0.562114	0.269038	ENSRNOG00000050553	ATPase H+ transporting V1 subunit C2(Atp6v1c2)
Atp6v1d	0.0580334	-0.203467	0.895616	-0.0498073	0.999979	0.0284783	0.431808	0.110027	0.618813	0.0780308	ENSRNOG00000009080	ATPase H+ transporting V1 subunit D(Atp6v1d)
Atp6v1e1	0.122749	-0.162317	0.990614	0.00833944	0.999979	0.00512768	0.456236	-0.0945546	0.472661	-0.0967614	ENSRNOG00000011905	ATPase H+ transporting V1 subunit E1(Atp6v1e1)
Atp6v1e2	0.476802	0.38827	0.956874	0.0725625	0.999979	0.0219078	0.118761	0.539571	0.154436	0.528756	ENSRNOG00000015566	ATPase H+ transporting V1 subunit E2(Atp6v1e2)
Atp6v1f	0.141064	-0.182193	0.991773	-0.00848868	0.999979	-0.0621678	0.230521	0.167641	0.0898794	0.237581	ENSRNOG00000007392	ATPase H+ transporting V1 subunit F(Atp6v1f)
Atp6v1g1	0.484221	-0.0722657	0.55969	-0.0904551	0.999979	0.043411	0.867971	-0.0173844	0.587843	-0.0539794	ENSRNOG00000008163	ATPase H+ transporting V1 subunit G1(Atp6v1g1)
Atp6v1h	0.415641	-0.0968153	0.999723	-0.000853326	0.740836	0.241766	0.943269	0.0104891	0.0406691	-0.239593	ENSRNOG00000030862	ATPase H+ transporting V1 subunit H(Atp6v1h)
Atp7a	0.00371474	0.85247	0.692862	0.215772	0.999979	-0.269397	0.0258342	0.530495	0.00111478	0.79392	ENSRNOG00000061367	ATPase copper transporting alpha(Atp7a)
Atp8a1	0.00458569	0.659247	0.407518	0.327464	0.999979	0.371566	0.00035278	0.761235	0.0824555	0.424898	ENSRNOG00000034200	ATPase phospholipid transporting 8A1(Atp8a1)
Atp8b2	0.789958	-0.276912	0.832116	0.287214	0.999979	-0.16213	0.670708	0.266836	0.436077	0.472284	ENSRNOG00000020822	ATPase, class I, type 8B, member 2(LOC685152)
Atp8b4	0.166544	0.94704	0.0384873	-2.02061	0.999979	-0.475237	0.076647	-1.36311	0.303038	-0.881165	ENSRNOG00000031598	ATPase phospholipid transporting 8B4 (putative)(Atp8b4)
Atp8b5p	0.213288	-0.885447	0.754163	-0.506237	0.999979	-0.322087	0.77416	-0.247727	0.978375	-0.0290994	ENSRNOG00000021704	ATPase, class I, type 8B, member 5, pseudogene(Atp8b5p)
Atp9a	0.588811	0.507126	0.470886	-0.970195	0.999979	0.0421986	0.131604	-1.16445	0.181395	-1.10935	ENSRNOG00000049484	-
Atp9b	0.0256065	0.308493	0.375377	0.179682	0.999979	0.014302	0.174429	0.171826	0.198062	0.173098	ENSRNOG00000032039	ATPase phospholipid transporting 9B (putative)(Atp9b)
Atpaf1	0.312407	-0.123581	0.547684	-0.136359	0.999979	-0.013511	0.0067669	-0.304307	0.0126058	-0.298067	ENSRNOG00000010169	ATP synthase mitochondrial F1 complex assembly factor 1(Atpaf1)
Atpaf2	0.0553333	-0.26948	0.735827	0.0955077	0.999979	0.122342	0.578929	-0.0812926	0.152986	-0.193401	ENSRNOG00000003719	ATP synthase mitochondrial F1 complex assembly factor 2(Atpaf2)
Atpsckmt	0.854368	0.0461277	0.981117	-0.0150471	0.999979	0.0662096	0.185659	0.185171	0.424813	0.126906	ENSRNOG00000022347	family with sequence similarity 173, member B(Fam173b)
Atr	0.526125	-0.102397	0.940986	-0.0418982	0.929079	0.162151	0.749293	0.0647259	0.652991	-0.0920187	ENSRNOG00000010027	ATR serine/threonine kinase(Atr)
Atraid	0.994454	-0.00205712	0.389314	-0.23535	0.999979	-0.13672	0.367642	-0.160316	0.949553	-0.0149457	ENSRNOG00000006326	all-trans retinoic acid-induced differentiation factor(Atraid)
Atrip	0.286712	0.156335	0.862531	0.0529634	0.999979	-0.0201096	0.775697	0.0395751	0.659945	0.0612797	ENSRNOG00000020670	ATR interacting protein(Atrip)
Atrn	0.061575	0.334514	0.976264	0.0327282	0.999979	-0.265646	0.181336	0.32616	0.0134734	0.584041	ENSRNOG00000021240	attractin(Atrn)
Atrx	0.536284	0.29503	0.913219	0.114015	0.781805	0.377062	0.143914	0.484316	0.763178	0.133509	ENSRNOG00000046897	-
Atrx	0.194778	0.187051	0.89223	0.063159	0.999979	0.130134	0.0862577	0.267979	0.352322	0.166559	ENSRNOG00000056703	ATRX, chromatin remodeler(Atrx)
Atxn10	0.0245592	-0.1868	0.00348276	-0.35876	0.999979	-0.113701	1.48037e-06	-0.49386	0.000157172	-0.415026	ENSRNOG00000014637	ataxin 10(Atxn10)
Atxn2	0.0935108	0.435106	0.820682	0.14136	0.999979	-0.124786	0.566782	-0.165226	0.991223	0.00399971	ENSRNOG00000001256	ataxin 2(Atxn2)
Atxn2l	0.182792	0.30897	0.246084	0.465979	0.999979	-0.0870044	0.712769	0.122976	0.464984	0.233697	ENSRNOG00000018686	ataxin 2-like(Atxn2l)
Atxn3	0.101911	0.288891	0.88901	-0.0950879	0.94118	0.297005	0.131636	0.350367	0.863007	0.053795	ENSRNOG00000005470	ataxin 3(Atxn3)
Atxn7	0.00364286	1.26079	0.858282	0.18722	0.999979	0.00773963	0.708727	0.175386	0.545878	0.278268	ENSRNOG00000007246	ataxin 7(Atxn7)
Atxn7l1	0.0822724	0.288433	0.992795	0.00646977	0.935343	-0.32289	0.00192779	-0.353875	0.803548	-0.0408413	ENSRNOG00000010415	ataxin 7-like 1(Atxn7l1)
Atxn7l2	0.639541	-0.0925454	0.993716	-0.0107173	0.999979	0.124277	0.901875	-0.0360249	0.653545	-0.126535	ENSRNOG00000028749	ataxin 7-like 2(Atxn7l2)
Atxn7l3	0.400513	0.703358	0.884686	0.272406	0.953417	0.887475	0.466729	0.519562	0.472508	-0.569411	ENSRNOG00000020930	ataxin 7-like 3(Atxn7l3)
Atxn7l3b	0.73284	-0.0552848	0.111459	-0.19533	0.999979	-0.0975473	0.0436362	-0.183574	0.494285	-0.0758912	ENSRNOG00000059744	ataxin 7-like 3B(Atxn7l3b)
Auh	0.853978	0.0336004	0.98919	-0.00691231	0.999979	0.0118981	0.566443	0.0558575	0.658745	0.0470071	ENSRNOG00000011684	AU RNA binding methylglutaconyl-CoA hydratase(Auh)
Aunip	0.727256	-0.287335	0.557338	-0.862596	0.999979	-0.687488	0.00047362	-2.70793	0.0438574	-1.63566	ENSRNOG00000022030	aurora kinase A and ninein interacting protein(Aunip)
Aup1	0.378412	0.0930961	0.344701	0.134856	0.999979	-0.0458439	0.000226025	0.300117	4.36122e-05	0.344675	ENSRNOG00000007842	ancient ubiquitous protein 1(Aup1)
Aurka	0.450578	-0.152959	0.579438	-0.160363	0.999979	-0.121393	0.00144986	-0.440583	0.0467488	-0.304824	ENSRNOG00000004479	aurora kinase A(Aurka)
Aurkaip1	0.0224182	0.223825	0.946877	0.0265215	0.999979	-0.0188387	0.00782317	0.280697	0.00493549	0.309093	ENSRNOG00000018691	cyclin L2(Ccnl2)
Aurkb	0.238782	-0.314562	0.709791	-0.23895	0.999979	-0.0476308	1.14185e-11	-1.79163	8.09863e-13	-2.00046	ENSRNOG00000005659	aurora kinase B(Aurkb)
Aurkc	0.298115	0.333105	0.99487	-0.00763315	0.999979	-0.132583	0.000986983	0.560731	7.08539e-05	0.694471	ENSRNOG00000015825	aurora kinase C(Aurkc)
Aven	0.0283318	-1.11364	0.885953	-0.203726	0.768044	-0.797662	0.261135	-0.584005	0.788144	0.17214	ENSRNOG00000006419	apoptosis and caspase activation inhibitor(Aven)
Avil	na	na	0.589071	0.854621	0.400277	1.7357	0.327661	0.841089	0.494405	-0.726886	ENSRNOG00000050419	advillin(Avil)
Avl9	0.00464692	0.46327	0.857512	0.0782969	0.999979	0.0967638	0.00250472	0.443496	0.0283492	0.35166	ENSRNOG00000013314	AVL9 cell migration associated(Avl9)
Avpi1	0.188071	-0.199036	0.428605	-0.174404	0.412333	-0.356322	0.00195071	-0.372085	0.97618	-0.0062151	ENSRNOG00000014828	arginine vasopressin-induced 1(Avpi1)
Axin2	0.0277235	0.402765	0.796466	0.133764	0.999979	-0.195789	0.750383	0.083963	0.24501	0.270875	ENSRNOG00000055010	axin 2(Axin2)
AY172581,24	0.00181118	0.358106	0.847926	0.211395	0.696323	-0.746228	0.201162	0.548781	0.018756	0.978771	ENSRNOG00000043866	-
AY172581,9	0.380606	0.118205	0.913235	0.161967	0.792126	-0.704169	0.299459	0.526824	0.0403307	0.994005	ENSRNOG00000030478	-
Azi2	0.00498034	0.366458	0.752973	0.0796499	0.999979	0.0598117	0.0011088	0.328251	0.00983703	0.280115	ENSRNOG00000010096	5-azacytidine induced 2(Azi2)
Azin1	0.163955	-0.153658	0.98749	-0.0137454	0.999979	0.146318	0.620299	0.0861324	0.610244	-0.092292	ENSRNOG00000005333	antizyme inhibitor 1(Azin1)
B2m	0.0674429	0.193323	1.65161e-16	1.05517	2.67561e-07	1.07645	8.11249e-29	1.38251	0.0734884	0.274987	ENSRNOG00000017123	beta-2 microglobulin(B2m)
B3galnt2	0.877379	-0.0267618	0.991454	-0.00686303	0.999979	0.0786438	0.862336	-0.0231885	0.429256	-0.0956102	ENSRNOG00000016855	beta-1,3-N-acetylgalactosaminyltransferase 2(B3galnt2)
B3galt4	0.0618832	0.261547	0.51576	0.169623	0.999979	0.0444483	0.379847	0.135288	0.509934	0.111311	ENSRNOG00000000471	Beta-1,3-galactosyltransferase 4(B3galt4)
B3galt5	0.128305	-0.55391	0.0302319	-1.06844	0.999979	-0.408009	0.011896	-0.98718	0.282915	-0.485309	ENSRNOG00000030983	Beta-1,3-galactosyltransferase 5(B3galt5)
B3galt6	0.00501035	-0.354081	0.000837844	-0.441726	0.736396	-0.373535	3.01431e-19	-0.999705	1.31888e-07	-0.629688	ENSRNOG00000019979	Beta-1,3-galactosyltransferase 6(B3galt6)
B3gat3	0.437008	-0.181553	0.787177	-0.109817	0.132303	-0.403263	0.0266544	-0.360624	0.844418	0.0447941	ENSRNOG00000019804	beta-1,3-glucuronyltransferase 3(B3gat3)
B3glct	0.532558	0.211422	0.530237	-0.252518	0.781805	-0.296812	0.769904	-0.0775741	0.33641	0.227065	ENSRNOG00000061346	beta 3-glucosyltransferase(B3glct)
B3gnt2	0.25191	-0.105378	0.896384	-0.0915457	0.999979	-0.197682	0.281795	-0.267592	0.863936	-0.054407	ENSRNOG00000009267	UDP-GlcNAc:betaGal beta-1,3-N-acetylglucosaminyltransferase 2(B3gnt2)
B3gnt3	0.29022	-0.702016	0.800154	-0.40163	0.999979	0.29897	0.0108685	-1.68105	0.00180589	-2.25422	ENSRNOG00000018764	UDP-GlcNAc:betaGal beta-1,3-N-acetylglucosaminyltransferase 3(B3gnt3)
B3gnt7	0.444114	-0.424723	0.740521	-0.43772	0.434431	-1.09656	0.129561	-0.905317	0.969351	-0.0340199	ENSRNOG00000018267	UDP-GlcNAc:betaGal beta-1,3-N-acetylglucosaminyltransferase 7(B3gnt7)
B3gnt9	0.670736	-0.288928	0.963401	0.106592	0.999979	0.359665	0.108021	-0.983998	0.0376976	-1.33685	ENSRNOG00000053895	UDP-GlcNAc:betaGal beta-1,3-N-acetylglucosaminyltransferase 9(B3gnt9)
B3gntl1	0.404102	0.498937	0.478935	0.414755	0.509859	-0.523922	0.995954	0.00223764	0.145395	0.507519	ENSRNOG00000049724	UDP-GlcNAc:betaGal beta-1,3-N-acetylglucosaminyltransferase-like 1(B3gntl1)
B4galnt1	0.454566	-0.0909622	0.508986	0.146015	0.999979	0.0823538	0.837616	-0.0317328	0.509735	-0.095283	ENSRNOG00000004839	beta-1,4-N-acetyl-galactosaminyl transferase 1(B4galnt1)
B4galt1	3.10409e-06	0.657099	0.120352	0.303998	0.829518	0.385242	7.55209e-07	0.642818	0.0902845	0.261878	ENSRNOG00000059461	beta-1,4-galactosyltransferase 1(B4galt1)
B4galt3	0.0817498	0.236366	0.202268	0.226771	0.996137	0.195804	0.00268796	0.345556	0.253184	0.15801	ENSRNOG00000003551	beta-1,4-galactosyltransferase 3(B4galt3)
B4galt4	0.00572484	-1.19114	0.067209	-1.24113	0.825747	-0.824778	0.0124156	-1.28476	0.420721	-0.48871	ENSRNOG00000003114	beta-1,4-galactosyltransferase 4(B4galt4)
B4galt5	0.102775	-0.36618	0.732401	-0.181626	0.8356	0.518751	0.900317	0.0381015	0.0315874	-0.521643	ENSRNOG00000008283	beta-1,4-galactosyltransferase 5(B4galt5)
B4galt7	0.000227099	0.475104	0.717626	0.144076	0.999979	0.140865	0.0499675	0.341558	0.365098	0.185408	ENSRNOG00000021886	beta-1,4-galactosyltransferase 7(B4galt7)
B4gat1	0.249404	-0.209183	0.856085	-0.0550732	0.999979	-0.108106	0.00258382	-0.315475	0.0679486	-0.21321	ENSRNOG00000020110	beta-1,4-glucuronyltransferase 1(LOC108348085)
B9d1	0.580783	-0.279686	0.548686	-0.402827	0.999979	0.0199901	0.00559087	-0.929369	0.00226304	-1.07416	ENSRNOG00000002462	B9 domain-containing protein 1(LOC108348055)
B9d2	0.141064	-0.287465	0.201919	0.248885	0.00159542	0.472151	0.0530759	0.256698	0.147631	-0.217384	ENSRNOG00000028753	B9 protein domain 2(B9d2)
Babam1	0.000876123	-0.291687	0.883112	0.0389289	0.999979	0.0595101	0.0559746	-0.172844	0.0175034	-0.220112	ENSRNOG00000017071	BRISC and BRCA1 A complex member 1(Babam1)
Babam2	0.431586	-0.10104	0.964938	0.0311963	0.997128	0.197654	0.00893712	-0.433409	9.45005e-05	-0.652884	ENSRNOG00000004364	brain and reproductive organ-expressed (TNFRSF1A modulator)(Bre)
Bace1	0.435534	0.495697	0.893063	0.151656	0.999979	0.376227	0.817404	-0.113246	0.295599	-0.461071	ENSRNOG00000016847	beta-secretase 1(Bace1)
Bach1	5.622e-08	1.20929	0.782197	0.190195	0.999979	-0.0527347	0.00259663	0.793058	0.000543588	0.937417	ENSRNOG00000001582	BTB domain and CNC homolog 1(Bach1)
Bach2	0.24771	0.2342	1.43858e-05	0.697713	0.757485	0.429007	5.97425e-19	1.24945	9.28729e-08	0.818292	ENSRNOG00000006170	BTB domain and CNC homolog 2(Bach2)
Bad	0.639541	-0.141657	0.630327	0.228539	0.981124	0.22321	0.553518	-0.159789	0.130324	-0.381927	ENSRNOG00000021147	BCL2-associated agonist of cell death(Bad)
Bag1	0.548844	0.136725	0.968508	0.042661	0.976701	-0.435857	0.209104	-0.333912	0.594047	0.167288	ENSRNOG00000008277	Bcl2 associated athanogene 1(Bag1)
Bag2	0.28864	-0.434589	0.945063	-0.123319	0.98238	-0.748868	0.00048056	-1.72864	0.0462513	-1.07836	ENSRNOG00000012709	Bcl2-associated athanogene 2(Bag2)
Bag3	0.00267856	0.436476	0.954783	0.039281	0.999979	-0.0912285	0.667025	-0.0934996	0.940746	0.0188955	ENSRNOG00000020298	Bcl2-associated athanogene 3(Bag3)
Bag4	0.266466	0.281131	0.9727	0.0312309	0.473199	0.352443	0.900802	0.0325177	0.151393	-0.315352	ENSRNOG00000042560	BCL2-associated athanogene 4(Bag4)
Bag5	0.934361	-0.0169422	0.539117	0.321368	0.999979	-0.171618	0.20922	0.36128	0.0592517	0.539827	ENSRNOG00000011527	BCL2-associated athanogene 5(NEWGENE_1310847)
Bag5l1	0.540571	-0.0767685	0.992795	0.00548012	0.999979	0.110794	0.454297	0.0836223	0.801287	-0.0341174	ENSRNOG00000058841	BCL2-associated athanogene 5(Bag5)
Bag6	0.701281	-0.266902	0.352401	0.427788	0.999979	0.118174	0.678578	0.143799	0.721208	0.132464	ENSRNOG00000000851	BCL2-associated athanogene 6(Bag6)
Bahd1	0.770803	0.0848634	0.991454	-0.0138859	0.999979	-0.0161616	0.99491	-0.00176553	0.909845	0.0332891	ENSRNOG00000010428	bromo adjacent homology domain containing 1(Bahd1)
Baiap2	0.977599	-0.0144391	0.902562	-0.169654	na	-0.837515	0.275299	-0.529493	0.988133	0.0101348	ENSRNOG00000004049	BAI1-associated protein 2(Baiap2)
Baiap2l1	0.999145	0.00142639	0.993775	-0.0287995	0.999979	0.101711	0.980868	0.0202345	0.910527	-0.101365	ENSRNOG00000001007	BAI1-associated protein 2-like 1(Baiap2l1)
Baiap3	3.76708e-25	1.20755	0.841492	0.165744	0.999979	-0.131665	0.301285	-0.351203	0.743298	-0.136307	ENSRNOG00000017893	BAI1-associated protein 3(Baiap3)
Bak1	0.314098	-0.128493	0.00836353	0.533468	0.156061	0.590069	1.26303e-06	0.79272	0.294713	0.217087	ENSRNOG00000000485	BCL2-antagonist/killer 1(Bak1)
Banf1	2.57102e-14	-0.593151	0.344701	-0.158606	0.999979	-0.099736	1.3286e-14	-0.697954	5.68792e-09	-0.561499	ENSRNOG00000020460	barrier to autointegration factor 1(Banf1)
Banp	0.0512425	0.343644	0.762975	0.112681	0.999979	-0.197784	0.474722	0.127787	0.0640629	0.304694	ENSRNOG00000019140	Btg3 associated nuclear protein(Banp)
Bap1	0.898483	0.0248062	0.826762	0.117187	0.999979	0.035695	0.914693	0.0292672	0.828117	0.0618903	ENSRNOG00000019097	Brca1 associated protein 1(Bap1)
Bard1	0.840414	-0.15496	0.454639	-0.930186	0.999979	0.868924	0.208116	-0.930494	0.0131618	-1.82033	ENSRNOG00000014960	BRCA1 associated RING domain 1(Bard1)
Batf	0.819859	0.0374668	0.00216831	-0.383624	0.0590261	-0.593452	0.00106523	-0.359664	0.0503936	0.238378	ENSRNOG00000008588	basic leucine zipper ATF-like transcription factor(Batf)
Batf3	na	na	0.941887	0.29825	0.999979	-1.1426	0.577864	-0.806444	0.370922	1.18663	ENSRNOG00000003716	basic leucine zipper ATF-like transcription factor 3(Batf3)
Bax	0.128305	-0.154282	0.793857	-0.0847312	0.976701	-0.277371	0.0774294	-0.233281	0.596758	0.0863436	ENSRNOG00000020876	BCL2 associated X, apoptosis regulator(Bax)
Baz1a	0.350898	-0.136702	0.800992	-0.0928782	0.999979	-0.0096049	0.285537	-0.170245	0.522118	-0.115314	ENSRNOG00000006828	bromodomain adjacent to zinc finger domain, 1A(Baz1a)
Baz1b	0.850472	0.0319623	0.562169	0.148893	0.999979	-0.0840495	0.878767	0.0264539	0.545474	0.0977084	ENSRNOG00000001453	bromodomain adjacent to zinc finger domain, 1B(Baz1b)
Baz2a	0.0311065	0.503893	0.044971	0.632585	0.999979	0.45048	0.0364435	0.529955	0.430182	0.241423	ENSRNOG00000053881	bromodomain adjacent to zinc finger domain, 2A(Baz2a)
Baz2b	0.000548876	0.448415	0.984556	-0.0163317	0.999979	0.0576309	0.0310597	0.337757	0.090198	0.287202	ENSRNOG00000056984	bromodomain adjacent to zinc finger domain, 2B(Baz2b)
Bbip1	0.871224	-0.123523	0.874271	-0.18159	0.999979	0.141347	0.819255	0.115589	0.998623	0.000871486	ENSRNOG00000047019	BBSome interacting protein 1(Bbip1)
Bbof1	0.44896	-0.611098	0.807203	0.369761	0.999979	0.439016	0.998558	0.00156532	0.62873	-0.385565	ENSRNOG00000011376	basal body orientation factor 1(Bbof1)
Bbs1	0.0828173	-0.934281	0.980707	0.0455331	0.999979	0.180205	0.430295	-0.36289	0.26143	-0.530408	ENSRNOG00000019832	Bardet-Biedl syndrome 1(Bbs1)
Bbs10	0.401656	0.172468	0.669667	-0.172406	0.999979	-0.187337	0.000801491	-0.594039	0.0340894	-0.414279	ENSRNOG00000026913	Bardet-Biedl syndrome 10(Bbs10)
Bbs12	0.454148	-0.258479	0.27248	-0.451537	0.999979	-0.0352281	0.733834	-0.112423	0.864083	-0.0619559	ENSRNOG00000007510	Bardet-Biedl syndrome 12(Bbs12)
Bbs2	0.376537	0.236813	0.913505	0.0608023	0.999979	-0.049396	0.829634	0.0488814	0.669805	0.0959112	ENSRNOG00000019020	Bardet-Biedl syndrome 2(Bbs2)
Bbs4	0.206612	0.241767	0.669667	-0.122699	0.999979	-0.0326752	0.000173922	0.452215	8.08882e-05	0.495522	ENSRNOG00000026171	Bardet-Biedl syndrome 4(Bbs4)
Bbs5	0.154411	-0.510216	0.363331	-0.390413	0.999979	-0.0813914	0.682512	-0.126588	0.923687	-0.034203	ENSRNOG00000007127	Bardet-Biedl syndrome 5(Bbs5)
Bbs9	0.799268	0.0533079	0.779682	-0.174746	0.999979	0.0179554	0.900066	-0.0428953	0.738949	-0.114113	ENSRNOG00000015189	Bardet-Biedl syndrome 9(Bbs9)
Bbx	0.0084136	0.292442	0.101363	0.270297	0.432734	0.384452	3.77652e-12	0.758287	0.00154152	0.38985	ENSRNOG00000001971	BBX, HMG-box containing(Bbx)
Bcap29	0.480796	0.0764367	0.74414	-0.0931701	0.999979	0.157078	0.0455956	0.24426	0.63981	0.073437	ENSRNOG00000007884	B-cell receptor-associated protein 29(Bcap29)
Bcap31	0.032049	0.17498	0.251291	-0.159761	0.999979	-0.115216	0.00142946	0.27599	2.49079e-06	0.40896	ENSRNOG00000055756	B-cell receptor-associated protein 31(Bcap31)
Bcas2	0.0157904	-0.201935	0.448222	-0.151584	0.999979	-0.0348097	0.430295	-0.100894	0.654706	-0.0649126	ENSRNOG00000018783	breast carcinoma amplified sequence 2(Bcas2)
Bcat1	6.94645e-06	-0.67403	0.105995	-0.591262	0.999979	-0.0475871	0.00718674	-0.712198	0.00689463	-0.752498	ENSRNOG00000015514	branched chain amino acid transaminase 1(Bcat1)
Bcat2	0.973094	0.00819611	0.932164	0.0430802	0.999979	0.00563903	0.330417	-0.157428	0.359364	-0.157813	ENSRNOG00000020956	branched chain amino acid transaminase 2(Bcat2)
Bccip	1.04643e-09	-0.443219	0.284906	-0.195264	0.999979	0.0222851	0.0186372	-0.271077	0.0229399	-0.27628	ENSRNOG00000018066	BRCA2 and CDKN1A interacting protein(Bccip)
Bcdin3d	0.768697	0.0741839	0.791342	0.133901	0.999979	0.00931585	5.51056e-05	0.747219	0.000156022	0.73956	ENSRNOG00000058430	BCDIN3 domain containing RNA methyltransferase(Bcdin3d)
Bckdha	0.0205777	0.2948	0.967199	-0.0176756	0.999979	-0.079937	0.880731	0.020082	0.425849	0.0957691	ENSRNOG00000020607	branched chain ketoacid dehydrogenase E1, alpha polypeptide(Bckdha)
Bckdhb	0.0917151	-0.212131	0.34993	-0.282299	0.999979	-0.229959	0.000735646	-0.588035	0.0318793	-0.412316	ENSRNOG00000009928	branched chain keto acid dehydrogenase E1 subunit beta(Bckdhb)
Bckdk	0.0906198	-0.173166	0.945903	-0.0312369	0.999979	0.0767487	0.319374	-0.140473	0.114936	-0.219149	ENSRNOG00000019485	branched chain ketoacid dehydrogenase kinase(Bckdk)
Bcl10	0.558376	-0.0758061	0.875106	0.0422444	0.834268	0.160548	0.0322265	0.196457	0.783074	0.0350383	ENSRNOG00000042389	B-cell CLL/lymphoma 10(Bcl10)
Bcl11b	0.00640053	0.334851	7.61291e-06	0.516203	0.116923	0.436691	0.00446048	0.322808	0.449402	-0.108898	ENSRNOG00000005776	B-cell CLL/lymphoma 11B(Bcl11b)
Bcl2	0.990141	0.00783675	0.977351	0.04314	0.999979	-0.307052	0.521878	0.238895	0.111628	0.549062	ENSRNOG00000002791	BCL2, apoptosis regulator(Bcl2)
Bcl2a1	0.0329088	-0.294077	0.86521	-0.143999	0.999979	-0.140184	0.000410008	-1.00002	0.0570437	-0.605879	ENSRNOG00000047606	BCL2-related protein A1(Bcl2a1)
Bcl2l1	3.79999e-11	-0.85106	0.402295	-0.338839	0.971867	-0.487068	5.06668e-09	-1.24768	0.00733313	-0.647395	ENSRNOG00000007946	Bcl2-like 1(Bcl2l1)
Bcl2l11	0.516659	0.151923	0.842944	0.12136	0.999979	-0.0452981	0.00690645	0.586005	0.00595135	0.625302	ENSRNOG00000016551	BCL2 like 11(Bcl2l11)
Bcl2l12	0.269404	-0.153825	0.95883	-0.0203287	0.99787	-0.0980894	0.345826	-0.103216	0.969571	-0.0059865	ENSRNOG00000020486	BCL2 like 12(Bcl2l12)
Bcl2l13	0.929496	-0.0256872	0.669201	0.205417	0.996137	0.276403	0.0828847	0.388137	0.516445	0.175873	ENSRNOG00000012394	BCL2 like 13(Bcl2l13)
Bcl2l14	na	na	0.978967	-0.10053	0.915607	0.869646	0.919243	-0.108599	0.38594	-0.861384	ENSRNOG00000028632	BCL2 like 14(Bcl2l14)
Bcl2l2	0.477481	-0.370399	0.764668	0.271985	0.751298	0.540137	0.452784	-0.33443	0.0270114	-0.937165	ENSRNOG00000015732	Bcl2-like 2(Bcl2l2)
Bcl3	0.229715	0.179328	0.590294	0.168393	0.999979	-0.0967364	0.0295164	0.333218	0.0076518	0.418621	ENSRNOG00000043416	B-cell CLL/lymphoma 3(Bcl3)
Bcl6	0.433314	0.588588	0.936747	0.116507	0.571343	0.900716	0.00104934	1.23043	0.470804	0.362477	ENSRNOG00000001843	B-cell CLL/lymphoma 6(Bcl6)
Bcl7a	na	-0.0353636	0.98919	0.0690736	0.999979	-0.222209	0.0482655	-1.7545	0.134222	-1.42895	ENSRNOG00000056017	BCL tumor suppressor 7A(Bcl7a)
Bcl7b	2.20382e-06	0.418657	0.216687	0.175769	0.999979	0.187672	0.000205386	0.330768	0.210781	0.134589	ENSRNOG00000032705	-
Bcl7c	0.772032	-0.087112	0.476577	-0.553214	0.906817	-0.80679	1.64686e-05	-1.72421	0.113036	-0.736019	ENSRNOG00000018916	BCL tumor suppressor 7C(Bcl7c)
Bcl9	0.973094	-0.0277452	0.873494	0.17576	0.999979	-0.0112216	0.203182	-0.531469	0.255733	-0.511774	ENSRNOG00000017516	B-cell CLL/lymphoma 9(Bcl9)
Bcl9l	0.193356	0.557482	0.485992	0.523754	0.999979	0.457672	0.631393	0.239344	0.774203	-0.162316	ENSRNOG00000012420	B-cell CLL/lymphoma 9-like(Bcl9l)
Bclaf1	0.842468	-0.0244935	0.252272	0.228834	0.614654	0.359062	0.0274467	0.286159	0.662443	-0.0742974	ENSRNOG00000058050	mitochondrial fission regulator 2(Mtfr2)
Bclaf3	0.561195	0.108137	0.944861	-0.0324005	0.999979	0.0338527	0.303568	0.145215	0.417255	0.124578	ENSRNOG00000005135	similar to chromosome X open reading frame 23(RGD1562161)
Bco2	0.134901	-0.70648	0.580241	-0.678823	0.999979	-0.679687	0.00211097	-1.89584	0.0187458	-1.55332	ENSRNOG00000038746	beta-carotene oxygenase 2(Bco2)
Bcor	0.00196583	-0.345772	0.337778	-0.175979	0.999979	0.0636318	0.316023	-0.123908	0.114739	-0.192825	ENSRNOG00000034240	BCL6 co-repressor(Bcor)
Bcorl1	0.114489	0.46181	0.339047	0.299156	0.999979	-0.350434	0.517458	0.144943	0.03429	0.420045	ENSRNOG00000005076	BCL6 co-repressor-like 1(Bcorl1)
Bcr	0.937625	0.0447801	1.86095e-05	0.981412	0.0577686	0.734017	0.00692276	0.61105	0.760148	-0.102638	ENSRNOG00000001304	BCR, RhoGEF and GTPase activating protein(Bcr)
Bcs1l	0.00937091	-0.471235	0.274786	-0.283301	0.999979	-0.288744	2.32996e-06	-0.733547	0.00343648	-0.49659	ENSRNOG00000016754	BCS1 homolog, ubiquinol-cytochrome c reductase complex chaperone(Bcs1l)
Bdh1	0.667231	-0.0720136	0.349854	-0.152192	0.999979	0.0438958	7.18315e-05	-0.365708	3.01275e-05	-0.402253	ENSRNOG00000001736	3-hydroxybutyrate dehydrogenase, type 1(Bdh1)
Bdh2	0.000922414	1.25966	0.837195	0.192806	0.999979	0.372687	0.854917	-0.0849244	0.24501	-0.472492	ENSRNOG00000014490	3-hydroxybutyrate dehydrogenase, type 2(Bdh2)
Bdp1	0.00535835	0.451129	0.0447918	0.38836	0.999979	-0.0754255	2.47378e-05	0.605952	8.03271e-06	0.667313	ENSRNOG00000017864	B double prime 1, subunit of RNA polymerase III transcription initiation factor IIIB(Bdp1)
Becn1	0.709258	0.0465679	0.76268	-0.0805386	0.999979	-0.0477079	0.992373	-0.00163094	0.689656	0.0585593	ENSRNOG00000020513	beclin 1(Becn1)
Begain	0.966393	0.0348903	0.848255	-0.232021	0.999979	-0.528305	0.0277475	-1.01197	0.464649	-0.400486	ENSRNOG00000004650	brain-enriched guanylate kinase-associated(Begain)
Bend5	0.980195	-0.0214913	0.10775	-1.26376	0.866939	-0.679363	0.130964	-0.885099	0.767869	-0.220487	ENSRNOG00000008025	BEN domain containing 5(Bend5)
Best1	0.987144	0.00363861	0.970451	0.0210118	0.868435	-0.199682	0.0157877	0.296323	7.28265e-05	0.482641	ENSRNOG00000020346	bestrophin 1(Best1)
Bet1	0.0881068	-0.18429	0.785404	-0.0790588	0.999979	0.033095	0.422588	-0.106822	0.242321	-0.155933	ENSRNOG00000011008	Bet1 golgi vesicular membrane trafficking protein(Bet1)
Bet1l	0.000791787	0.439805	0.883031	0.0528684	0.999979	0.105296	0.00148523	0.362778	0.0596862	0.240993	ENSRNOG00000013165	Bet1 golgi vesicular membrane trafficking protein-like(Bet1l)
Bex2	na	na	0.78172	0.444461	0.999979	-0.24938	0.612529	-0.418444	0.827287	-0.206119	ENSRNOG00000032729	brain expressed X-linked 2(Bex2)
Bex3	0.992232	0.00237886	0.525206	-0.144586	0.696323	-0.23424	2.28102e-09	-0.648495	0.000267109	-0.431321	ENSRNOG00000028822	brain expressed X-linked 3(Bex3)
Bfar	0.420049	0.155244	0.779793	0.0996537	0.999979	0.0232124	0.52187	0.108795	0.62896	0.0900327	ENSRNOG00000003151	bifunctional apoptosis regulator(Bfar)
Bfsp2	0.776978	0.157646	0.013888	-1.05046	0.999979	-0.091139	0.127602	-0.556627	0.248271	-0.462739	ENSRNOG00000010899	beaded filament structural protein 2(Bfsp2)
Bhlhb9	0.0962689	0.400302	0.991311	0.0162693	0.507833	0.39963	0.944797	0.0215931	0.146154	-0.381723	ENSRNOG00000003191	basic helix-loop-helix domain containing, class B, 9(Bhlhb9)
Bhlhe40	3.31084e-14	-0.660008	0.71358	-0.145857	0.999979	0.180384	0.283693	-0.20505	0.0737184	-0.334281	ENSRNOG00000007152	basic helix-loop-helix family, member e40(Bhlhe40)
Bicd2	0.932767	-0.0240332	0.98919	0.0143291	0.999979	0.0447111	0.836255	-0.0452577	0.775626	-0.0649975	ENSRNOG00000016031	BICD cargo adaptor 2(Bicd2)
Bicdl1	0.010983	-0.31574	0.902145	0.0761731	0.999979	-0.310222	0.219639	0.259362	0.00408647	0.570609	ENSRNOG00000056955	BICD family like cargo adaptor 1(Bicdl1)
Bicdl2	0.65257	0.170312	0.968508	0.0390692	0.21772	-0.552004	0.442985	-0.200038	0.157305	0.347323	ENSRNOG00000003457	BICD family like cargo adaptor 2(Bicdl2)
Bicra	0.187242	0.391931	0.894938	0.109324	0.999979	-0.363931	0.496306	0.210194	0.0192347	0.636788	ENSRNOG00000011262	glioma tumor suppressor candidate region gene 1(Gltscr1)
Bicral	0.00358713	0.5436	0.999876	0.000206955	0.999979	0.0158815	0.903578	0.0344748	0.794609	0.0764163	ENSRNOG00000016229	GLTSCR1-like(Gltscr1l)
Bid	2.14511e-05	-0.341279	0.0506854	-0.183905	0.999979	-0.0522316	0.00157185	-0.226091	0.0186903	-0.18268	ENSRNOG00000012439	BH3 interacting domain death agonist(Bid)
Bik	0.795512	0.184286	0.640367	-0.421225	0.979005	-0.527757	0.0850819	-0.758783	0.418659	-0.409892	ENSRNOG00000010359	BCL2-interacting killer(Bik)
Bin1	0.770466	0.0356825	0.0570764	-0.207683	0.872555	-0.174707	1.61389e-09	-0.468333	0.000612772	-0.292631	ENSRNOG00000012852	bridging integrator 1(Bin1)
Bin2	0.289871	-0.0959807	0.281639	-0.19722	0.703849	-0.386719	1.36515e-07	-0.562365	0.24501	-0.155471	ENSRNOG00000031930	bridging integrator 2(Bin2)
Bin3	0.64387	-0.0645377	0.680082	-0.100317	0.999979	-0.0577739	0.199292	0.150112	0.0702364	0.212484	ENSRNOG00000018023	bridging integrator 3(Bin3)
Birc2	0.0121308	0.301504	0.256806	0.227873	0.0128455	0.624851	8.52912e-12	0.792465	0.235573	0.176315	ENSRNOG00000010602	baculoviral IAP repeat-containing 2(Birc2)
Birc3	0.946468	-0.00880415	1.03272e-06	0.576692	0.00142938	0.558262	1.28428e-20	0.99461	0.000373536	0.430331	ENSRNOG00000005731	baculoviral IAP repeat-containing 3(Birc3)
Birc5	0.715918	-0.215756	0.942864	0.111969	0.999979	-0.301348	0.308764	-0.502638	0.689161	-0.234501	ENSRNOG00000050819	baculoviral IAP repeat-containing 5(Birc5)
Birc6	0.0982775	0.26281	0.00117376	0.518241	0.00879059	0.804144	8.36209e-24	1.29928	0.000532868	0.512862	ENSRNOG00000027191	baculoviral IAP repeat-containing 6(Birc6)
Bivm	0.946271	-0.0244626	0.591226	-0.245976	0.999979	0.0873126	0.00264315	-0.657402	0.000688319	-0.776241	ENSRNOG00000022894	basic, immunoglobulin-like variable motif containing(Bivm)
Blcap	0.356302	0.16498	0.641199	0.1553	0.999979	0.16663	0.101643	0.264911	0.591046	0.106907	ENSRNOG00000024437	bladder cancer associated protein(Blcap)
Bles03	0.756647	-0.0957335	0.992945	0.0120011	0.999979	-0.164504	0.825576	-0.0656702	0.791885	0.0824788	ENSRNOG00000020551	basophilic leukemia expressed protein BLES03(Bles03)
Blm	0.32901	-0.14358	0.954783	-0.0404009	0.999979	0.237658	0.467862	-0.152053	0.0409478	-0.392807	ENSRNOG00000011213	Bloom syndrome RecQ like helicase(Blm)
Blmh	0.0027709	-0.246821	0.621337	-0.118744	0.999979	-0.165102	0.0054338	-0.308937	0.349644	-0.126243	ENSRNOG00000003563	bleomycin hydrolase(Blmh)
Bloc1s1	0.638224	-0.0951071	0.654824	-0.172305	0.999979	-0.211243	0.131417	-0.28175	0.719039	-0.0854933	ENSRNOG00000007784	biogenesis of lysosomal organelles complex-1, subunit 1(Bloc1s1)
Bloc1s2	0.0106983	-0.22684	0.399548	-0.109566	0.999979	-0.135852	0.21074	-0.101638	0.633588	0.046598	ENSRNOG00000012684	biogenesis of lysosomal organelles complex-1, subunit 2(Bloc1s2)
Bloc1s3	0.701931	0.218052	0.873203	0.14034	0.999979	-0.192113	0.367009	0.29981	0.157621	0.46381	ENSRNOG00000017463	biogenesis of lysosomal organelles complex-1, subunit 3(Bloc1s3)
Bloc1s4	0.918692	0.0196272	0.988704	0.0139665	0.999979	-0.0683436	0.0640688	0.2831	0.0234343	0.354405	ENSRNOG00000054224	biogenesis of lysosomal organelles complex 1 subunit 4(Bloc1s4)
Bloc1s5	0.483895	0.0918382	0.99487	-0.00541822	0.999979	0.0861837	0.445444	-0.11545	0.180125	-0.19817	ENSRNOG00000016497	biogenesis of lysosomal organelles complex 1 subunit 5(Bloc1s5)
Bloc1s6	0.929604	0.0199395	0.868509	0.0797462	0.762547	0.261486	0.194596	0.22994	0.844749	-0.0465144	ENSRNOG00000037160	biogenesis of lysosomal organelles complex 1 subunit 6(Bloc1s6)
Blvra	0.00710618	-0.284856	0.965007	-0.0248355	0.999979	0.0936074	0.0154315	-0.323722	0.00144627	-0.434582	ENSRNOG00000011778	biliverdin reductase A(Blvra)
Blvrb	0.446558	-0.317219	0.356402	0.4279	0.999979	0.0681836	0.0373682	-0.611503	0.0369027	-0.652008	ENSRNOG00000024410	biliverdin reductase B(Blvrb)
Blzf1	0.22012	0.157443	0.947141	-0.0237986	0.999979	0.163288	0.041688	0.197655	0.785692	0.0366784	ENSRNOG00000002884	basic leucine zipper nuclear factor 1(Blzf1)
Bmf	0.31595	-0.611378	0.159591	-1.25191	0.999659	-0.809137	0.679496	0.294185	0.0299965	1.26101	ENSRNOG00000007529	Bcl2 modifying factor(Bmf)
Bmi1	0.711831	0.142814	0.987155	-0.0226039	0.782919	0.358858	0.82965	0.0652968	0.245305	-0.311834	ENSRNOG00000016585	BMI1 proto-oncogene, polycomb ring finger(Bmi1)
Bmp1	0.994804	-0.00796875	0.999876	0.0016445	0.999979	0.117859	0.251873	-0.669037	0.170794	-0.842844	ENSRNOG00000010890	bone morphogenetic protein 1(Bmp1)
Bmp10	na	na	0.119213	1.02318	0.999979	-0.32469	0.244713	0.614646	0.0615565	0.962339	ENSRNOG00000009316	bone morphogenetic protein 10(Bmp10)
Bmp2k	0.959426	-0.0420947	0.813152	0.178066	0.999979	-0.18857	0.605255	0.181808	0.257616	0.372497	ENSRNOG00000002040	-
Bmp7	0.899158	-0.0854711	0.435281	-0.756062	0.815034	-0.658564	0.000926817	-1.83072	0.055746	-1.13437	ENSRNOG00000053384	bone morphogenetic protein 7(Bmp7)
Bmpr2	0.539872	0.173698	0.952032	0.0462488	0.886781	-0.262136	0.965148	0.011613	0.258981	0.254537	ENSRNOG00000022196	bone morphogenetic protein receptor type 2(Bmpr2)
Bms1	0.252927	-0.119794	0.984401	-0.0138087	0.999979	0.113581	0.201162	-0.181556	0.0231276	-0.314688	ENSRNOG00000006576	BMS1 ribosome biogenesis factor(Bms1)
Bmt2	0.886051	-0.0770284	0.991773	-0.0386403	0.999979	0.235785	0.859418	0.138427	0.819034	-0.189909	ENSRNOG00000007224	base methyltransferase of 25S rRNA 2 homolog(Bmt2)
Bnip1	0.0530966	-0.312993	0.711316	-0.135992	0.225253	-0.441743	0.000638768	-0.524565	0.646492	-0.095357	ENSRNOG00000020753	BCL2/adenovirus E1B interacting protein 1(Bnip1)
Bnip2	0.25102	-0.149519	0.61153	0.126408	0.928303	0.172319	0.0613211	0.227299	0.715452	0.0583668	ENSRNOG00000056024	BCL2/adenovirus E1B interacting protein 2(Bnip2)
Bnip3	0.957994	-0.0261612	0.793756	-0.160506	0.999979	-0.0115451	0.718521	-0.110341	0.676707	-0.133216	ENSRNOG00000017243	BCL2/adenovirus E1B interacting protein 3(Bnip3)
Bnip3l	5.34611e-06	0.55909	0.795135	-0.11409	0.999979	0.114847	0.9069	0.0276018	0.87164	-0.0397751	ENSRNOG00000009820	BCL2/adenovirus E1B interacting protein 3-like(Bnip3l)
Bod1	0.854319	0.117313	0.845593	-0.250565	0.445405	-0.792261	0.658585	-0.256356	0.322757	0.527241	ENSRNOG00000020717	biorientation of chromosomes in cell division 1(Bod1)
Bod1l1	0.3162	0.187668	0.996282	-0.00604149	0.999979	0.00903049	0.0323537	0.440155	0.0263876	0.477113	ENSRNOG00000050437	biorientation of chromosomes in cell division 1-like 1(Bod1l1)
Bok	na	na	0.664011	-0.907346	0.999979	-0.746729	0.10108	-1.72141	0.265855	-1.26361	ENSRNOG00000018214	BOK, BCL2 family apoptosis regulator(Bok)
Bola1	0.443139	-0.158062	0.795936	-0.132506	0.999979	-0.13805	0.367642	-0.205402	0.827388	-0.0620543	ENSRNOG00000021185	bolA family member 1(Bola1)
Bola2	0.0124933	-0.264469	0.323904	-0.205463	0.999979	-0.166693	0.00718674	-0.336726	0.326694	-0.147537	ENSRNOG00000047988	bolA family member 2(Bola2)
Bola3	4.20363e-05	-0.546074	0.0410993	-0.296385	0.999979	-0.0809359	0.0248601	-0.260097	0.11426	-0.201863	ENSRNOG00000021866	bolA family member 3(Bola3)
Bop1	0.0043331	-0.295265	0.999876	0.0007734	0.999979	-0.170496	0.0172858	-0.365205	0.328324	-0.177521	ENSRNOG00000021773	block of proliferation 1(Bop1)
Bora	0.0700354	-0.335684	0.826835	-0.150681	0.999979	0.11917	0.588371	-0.170923	0.221031	-0.364004	ENSRNOG00000024798	bora, aurora kinase A activator(Bora)
Borcs5	0.666071	0.0825556	0.988984	0.0117998	0.999979	0.107004	0.423533	-0.118026	0.122947	-0.220405	ENSRNOG00000006505	BLOC-1 related complex subunit 5(Borcs5)
Borcs6	0.0241262	0.594879	0.0560806	0.442722	0.999979	0.0282897	0.150561	0.276694	0.17931	0.276208	ENSRNOG00000006513	BLOC-1 related complex subunit 6(Borcs6)
Borcs7	0.138527	-0.149512	0.00012871	-0.338415	0.999979	-0.0145151	3.05216e-06	-0.371453	2.16505e-05	-0.357202	ENSRNOG00000020076	BLOC-1 related complex subunit 7(Borcs7)
Borcs8	0.167963	-0.362253	0.968508	0.0383694	0.999979	-0.0944278	0.159012	0.326096	0.0772472	0.417096	ENSRNOG00000020427	BLOC-1 related complex subunit 8(Borcs8)
Bpgm	0.435713	-0.106847	0.783292	-0.081815	0.999979	0.02563	0.460059	0.101545	0.59086	0.0816983	ENSRNOG00000010133	bisphosphoglycerate mutase(Bpgm)
Bpnt1	1.1241e-10	-0.51756	0.272793	-0.268419	0.999979	-0.0177792	0.000273752	-0.541137	0.000149515	-0.588124	ENSRNOG00000002378	3'(2'), 5'-bisphosphate nucleotidase 1(Bpnt1)
Bptf	0.00115675	0.462467	0.979188	-0.0188669	0.999979	-0.0387733	0.917715	0.0210797	0.788657	0.0564775	ENSRNOG00000047296	bromodomain PHD finger transcription factor(Bptf)
Braf	0.471002	0.446909	0.575686	-0.42734	0.999979	0.00816244	0.895362	0.0650922	0.983169	-0.0129017	ENSRNOG00000010957	B-Raf proto-oncogene, serine/threonine kinase(Braf)
Brap	0.00638843	0.557558	0.606136	0.184927	0.999979	-0.137722	0.0876399	0.301517	0.0133923	0.436828	ENSRNOG00000046497	-
Brat1	0.136032	0.251002	0.687183	0.224685	0.999979	0.132598	0.794865	0.0856634	0.987709	-0.00606607	ENSRNOG00000001236	BRCA1-associated ATM activator 1(Brat1)
Brca1	0.668417	-0.150979	0.818302	-0.176121	0.699676	-0.754917	0.0183155	-0.696816	0.978647	-0.012727	ENSRNOG00000020701	BRCA1, DNA repair associated(Brca1)
Brca2	0.774629	-0.0665785	0.328811	0.344209	0.428579	0.482311	0.0298429	0.468722	0.975559	-0.011132	ENSRNOG00000001111	BRCA2, DNA repair associated(Brca2)
Brcc3	0.671901	-0.061233	0.998662	0.00469613	0.974417	0.327333	0.00137355	-0.742107	1.38295e-06	-1.12586	ENSRNOG00000048061	BRCA1/BRCA2-containing complex, subunit 3(Brcc3)
Brd1	0.433314	0.164376	0.939745	-0.0411933	0.999979	-0.0290813	0.757691	0.0611704	0.507471	0.125045	ENSRNOG00000004538	bromodomain containing 1(Brd1)
Brd3	0.953251	0.0142328	0.807203	0.110821	0.999979	0.128465	0.354307	0.183738	0.761777	0.0738986	ENSRNOG00000007681	bromodomain containing 3(Brd3)
Brd4	0.837915	0.0296015	0.862829	0.0557002	0.999979	-0.0164153	0.185747	0.159047	0.154401	0.178571	ENSRNOG00000006770	bromodomain containing 4(Brd4)
Brd7	0.127148	-0.196704	0.647491	-0.128165	0.999979	0.0151536	0.0104792	-0.328263	0.0227742	-0.311359	ENSRNOG00000014419	bromodomain containing 7(Brd7)
Brd8	0.024844	0.246927	0.930859	-0.039585	0.999979	0.133908	0.806336	0.0426965	0.549202	-0.0986376	ENSRNOG00000020340	bromodomain containing 8(Brd8)
Brd9	0.785309	0.0463148	0.530603	-0.135511	0.999979	-0.033978	0.0745678	-0.20408	0.161408	-0.174324	ENSRNOG00000015676	bromodomain containing 9(Brd9)
Brdt	na	na	0.945137	0.190503	0.976701	0.696755	0.845355	-0.199929	0.319929	-0.96939	ENSRNOG00000002073	-
Brf1	0.0119541	0.387611	0.975016	0.0215863	0.999979	-0.152851	0.137277	0.226809	0.012921	0.372616	ENSRNOG00000014595	BRF1, RNA polymerase III transcription initiation factor 90 subunit(Brf1)
Brf2	0.332669	0.171117	0.951617	-0.031066	0.999979	-0.0512923	0.225409	0.172877	0.092044	0.241329	ENSRNOG00000012739	BRF2, RNA polymerase III transcription initiation factor 50 subunit(Brf2)
Bri3	0.118709	0.639693	0.996792	-0.0104611	0.999979	-0.499584	0.646039	0.218053	0.0742184	0.729468	ENSRNOG00000001009	brain protein I3(Bri3)
Bri3bp	0.129172	-0.340745	0.493336	-0.196888	0.999979	-0.261664	0.00144811	-0.4728	0.180781	-0.231498	ENSRNOG00000000979	Bri3 binding protein(Bri3bp)
Brip1	0.00191866	-0.707115	0.98706	-0.0658418	0.999979	0.107489	0.146405	-1.03296	0.0996489	-1.21105	ENSRNOG00000059997	BRCA1 interacting protein C-terminal helicase 1(Brip1)
Brix1	9.53175e-10	-0.438669	0.520642	-0.187503	0.999979	0.0530535	0.0113088	-0.379677	0.00311906	-0.456564	ENSRNOG00000018021	BRX1, biogenesis of ribosomes(Brix1)
Brk1	0.953317	-0.0135335	0.874414	0.0842893	0.999979	0.110681	0.374569	0.183447	0.765319	0.0750687	ENSRNOG00000010184	BRICK1, SCAR/WAVE actin-nucleating complex subunit(Brk1)
Brms1l	0.000251435	0.447197	0.669667	-0.164275	0.953345	0.196921	0.388895	-0.17154	0.0527168	-0.363833	ENSRNOG00000008249	breast cancer metastasis-suppressor 1-like(Brms1l)
Brms1l	1.94932e-05	-1.07754	0.0298877	0.979354	0.976701	-0.365924	0.0796017	0.67032	0.00512611	1.05838	ENSRNOG00000051077	breast cancer metastasis-suppressor 1-like(Brms1l)
Brox	0.00164788	0.358767	0.630197	0.0998798	0.781805	0.212959	0.00218072	0.285325	0.526123	0.0768424	ENSRNOG00000052963	BRO1 domain and CAAX motif containing(Brox)
Brpf1	0.631874	0.0923781	0.742957	0.102401	0.999979	-0.0801011	0.6429	0.0753749	0.338479	0.148293	ENSRNOG00000008142	bromodomain and PHD finger containing, 1(Brpf1)
Brpf3	0.259404	0.318076	0.251291	0.498548	0.999979	0.367725	0.00950487	0.710837	0.113036	0.487201	ENSRNOG00000028641	bromodomain and PHD finger containing, 3(Brpf3)
Brwd1	0.000475718	0.517145	0.573688	0.237211	0.999979	0.14342	0.0245299	0.468269	0.201692	0.30195	ENSRNOG00000001632	bromodomain and WD repeat domain containing 1(Brwd1)
Brwd3	0.00718987	0.478882	0.644566	0.150663	0.999979	0.152893	2.825e-05	0.582431	0.00430302	0.436469	ENSRNOG00000002291	bromodomain and WD repeat domain containing 3(Brwd3)
Bscl2	0.77205	-0.053371	0.977337	0.0139688	0.999979	0.067871	0.00322725	-0.291784	0.000554183	-0.355508	ENSRNOG00000052393	-
Bsdc1	0.0135656	0.445991	0.684678	0.160839	0.999979	0.177829	0.00613786	0.469034	0.107623	0.310569	ENSRNOG00000008338	BSD domain containing 1(Bsdc1)
Bsg	0.0501143	-0.192638	0.57121	-0.0929251	0.999979	-0.0377813	0.815912	-0.0253984	0.817182	0.0266772	ENSRNOG00000008414	basigin(Bsg)
Bspry	0.00179181	-1.30653	0.657267	-0.417336	0.999979	-0.191286	0.00130825	-1.42471	0.0116658	-1.19316	ENSRNOG00000015105	B-box and SPRY domain containing(Bspry)
Bst2	0.426271	-0.599497	1.89379e-11	2.07796	0.00191143	2.08261	2.15325e-17	2.48052	0.311046	0.434269	ENSRNOG00000059900	-
Btaf1	0.923306	-0.0304578	0.654824	0.20041	0.99787	0.201088	0.0660675	0.38677	0.467459	0.183934	ENSRNOG00000017938	B-TFIID TATA-box binding protein associated factor 1(Btaf1)
Btbd1	2.08027e-08	0.739706	0.978967	0.022285	0.999659	-0.263722	0.0333102	-0.378409	0.570311	-0.12677	ENSRNOG00000019529	BTB domain containing 1(Btbd1)
Btbd10	0.621906	0.0947426	0.992795	-0.0072352	0.999979	-0.0234667	0.692659	0.0642799	0.556668	0.095478	ENSRNOG00000014341	BTB domain containing 10(Btbd10)
Btbd19	0.314232	-0.174576	0.688321	0.131397	0.999979	0.0779832	0.325665	0.15996	0.663922	0.0834323	ENSRNOG00000042163	BTB domain containing 19(Btbd19)
Btbd2	0.510149	0.523296	0.975016	0.0626596	0.999979	-0.3123	0.404497	-0.407695	0.919157	-0.0619916	ENSRNOG00000018788	BTB domain containing 2(Btbd2)
Btbd6	0.741246	-0.138671	0.911059	-0.0814353	0.999979	-0.0259659	0.61449	-0.138891	0.69146	-0.118918	ENSRNOG00000014693	BTB domain containing 6(Btbd6)
Btbd7	0.934031	-0.0361164	0.991454	0.0163429	0.974417	-0.293305	0.102595	0.399222	0.00613358	0.655974	ENSRNOG00000008598	BTB domain containing 7(Btbd7)
Btbd8	0.484221	0.367426	0.608877	0.331895	0.999979	-0.167086	0.624299	0.187591	0.337631	0.35061	ENSRNOG00000023446	BTB (POZ) domain containing 8(Btbd8)
Btbd9	0.781361	-0.0529502	0.529805	0.132541	0.999979	-0.063427	0.00504046	0.294248	0.00155403	0.34355	ENSRNOG00000000540	BTB domain containing 9(Btbd9)
Btd	0.985615	0.00696577	0.991479	0.0152595	0.656845	-0.397094	0.645096	0.129053	0.0419995	0.483957	ENSRNOG00000019656	biotinidase(Btd)
Btf3	0.00166265	-0.350373	0.862829	0.0504886	0.999979	0.00776616	0.333598	-0.110731	0.308197	-0.122045	ENSRNOG00000016912	basic transcription factor 3(Btf3)
Btf3l4	0.424331	-0.128756	0.579045	-0.125132	0.999979	-0.00485504	0.775807	-0.0410636	0.809987	-0.0374455	ENSRNOG00000008512	basic transcription factor 3-like 4(Btf3l4)
Btg1	0.0665047	0.178782	0.716672	0.160907	0.999979	-0.0267262	0.0174091	0.453857	0.0132421	0.493884	ENSRNOG00000004284	BTG anti-proliferation factor 1(Btg1)
Btg2	3.12188e-23	0.930175	0.86521	0.0772006	0.999979	-0.0879187	0.560023	0.111234	0.25821	0.206399	ENSRNOG00000003300	BTG anti-proliferation factor 2(Btg2)
Btg3	0.795783	-0.106794	0.969241	0.0371094	na	-0.286115	0.815467	-0.0680871	0.292885	0.266163	ENSRNOG00000001555	BTG anti-proliferation factor 3(Btg3)
Btla	0.271956	-0.180889	0.0981628	-0.401947	0.920485	-0.291643	0.544493	0.130126	0.0291352	0.411312	ENSRNOG00000030246	B and T lymphocyte associated(Btla)
Btn2a2	0.3327	-0.500171	0.991194	-0.032387	0.999979	-0.106223	0.114229	0.716457	0.0916624	0.79521	ENSRNOG00000038877	butyrophilin, subfamily 2, member A2(Btn2a2)
Btrc	0.812317	-0.0454648	0.71358	0.170413	0.819554	-0.241746	0.885646	0.0393393	0.278675	0.253504	ENSRNOG00000016280	beta-transducin repeat containing E3 ubiquitin protein ligase(Btrc)
Bub1	0.00546547	-0.847085	0.811443	-0.381583	0.999979	-0.143544	0.00461841	-1.75139	0.00297789	-1.92877	ENSRNOG00000032778	BUB1 mitotic checkpoint serine/threonine kinase(Bub1)
Bub1b	0.0328527	-0.91382	0.452099	-0.755038	na	0.291138	5.30232e-05	-2.24615	1.2796e-05	-2.60647	ENSRNOG00000007906	BUB1 mitotic checkpoint serine/threonine kinase B(Bub1b)
Bub3	0.000402577	-0.284604	0.372767	-0.161194	0.999979	-0.0513076	4.92799e-06	-0.453335	0.000317398	-0.383017	ENSRNOG00000020643	BUB3 mitotic checkpoint protein(Bub3)
Bud13	0.718497	-0.0920357	0.694984	0.173769	0.999979	0.175019	0.543428	0.142916	0.977735	-0.00924288	ENSRNOG00000018665	BUD13 homolog(Bud13)
Bud23	0.00213624	-0.377	0.687316	-0.122597	0.886781	-0.287589	0.0828809	-0.243859	0.86163	0.0335106	ENSRNOG00000033700	Williams Beuren syndrome chromosome region 22(Wbscr22)
Bud31	0.887744	0.0211108	0.999876	0.000437405	0.999979	0.0379467	0.0158535	0.23618	0.0305824	0.225286	ENSRNOG00000000989	BUD31 homolog(Bud31)
Bysl	0.000506395	-0.466444	0.910977	-0.0653175	0.999979	-0.0431052	0.0089978	-0.465794	0.0459874	-0.386008	ENSRNOG00000049121	bystin-like(Bysl)
Bzw1	0.561137	-0.0553165	0.20197	-0.208407	0.999979	0.0412396	0.0658841	-0.208202	0.0231233	-0.262768	ENSRNOG00000013977	basic leucine zipper and W2 domains 1(Bzw1)
Bzw2	4.00494e-09	-0.540528	0.052164	-0.334725	0.999979	-0.318301	5.58345e-16	-0.984547	1.47916e-06	-0.63387	ENSRNOG00000005096	basic leucine zipper and W2 domains 2(Bzw2)
C12H7orf61	0.990037	0.0082844	0.991479	0.0286761	0.999979	0.393336	0.9245	0.0551565	0.807678	-0.14673	ENSRNOG00000024616	Uncharacterized protein C7orf61 homolog(LOC100362783)
C1d	4.96586e-05	-0.386136	0.683055	-0.0886741	0.999979	0.0442415	0.00984702	-0.24811	0.00347427	-0.291169	ENSRNOG00000005982	C1D nuclear receptor co-repressor(C1d)
C1galt1	0.222975	0.267083	0.761467	0.0929782	0.538853	0.314216	7.13699e-08	0.603037	0.0224763	0.301126	ENSRNOG00000007804	core 1 synthase, glycoprotein-N-acetylgalactosamine 3-beta-galactosyltransferase, 1(C1galt1)
C1galt1c1	0.242523	-0.164914	0.633602	-0.134472	0.999979	0.128354	0.928	0.0159762	0.41795	-0.12868	ENSRNOG00000002536	C1GALT1-specific chaperone 1(C1galt1c1)
C1qbp	2.18802e-13	-0.65884	0.617138	-0.148835	0.999979	-0.146017	2.54275e-06	-0.618646	0.00113912	-0.464328	ENSRNOG00000006949	complement C1q binding protein(C1qbp)
C1qtnf12	0.405736	-0.368715	0.000114002	-2.44832	0.00618611	-2.15687	2.59647e-05	-2.4015	0.470804	-0.510948	ENSRNOG00000019864	family with sequence similarity 132, member A(Fam132a)
C1qtnf6	0.906498	-0.129514	0.980923	0.0923439	0.999979	0.315085	0.868205	0.177207	0.891564	0.156251	ENSRNOG00000007300	C1q and tumor necrosis factor related protein 6(C1qtnf6)
C1r	na	na	0.123778	1.5389	6.91353e-05	3.67413	0.00111597	2.21167	0.218521	-1.27785	ENSRNOG00000011796	complement C1r(C1r)
C2	na	na	8.69034e-20	5.12618	3.79969e-13	6.17484	7.9061e-20	5.07195	0.344833	-0.951315	ENSRNOG00000051235	complement C2(C2)
C2cd2	0.054879	0.468734	0.494431	0.253126	0.999979	-0.0404279	0.0817418	-0.359861	0.109419	-0.353442	ENSRNOG00000001621	C2 calcium-dependent domain containing 2(C2cd2)
C2cd2l	0.101365	0.40457	0.0755789	0.433404	0.999979	-0.0987701	0.424831	0.171656	0.232118	0.255588	ENSRNOG00000009719	C2CD2-like(C2cd2l)
C2cd3	0.224471	0.220153	0.106338	0.33023	0.993821	0.279735	0.0288328	0.329714	0.694282	0.0792483	ENSRNOG00000017608	C2 calcium-dependent domain containing 3(C2cd3)
C2cd5	0.874987	0.0259302	0.180328	-0.228911	0.295643	-0.350442	1.8221e-06	-0.520389	0.213358	-0.165923	ENSRNOG00000014382	C2 calcium-dependent domain containing 5(C2cd5)
C5	0.439422	0.455241	0.993716	0.0168581	0.999979	-0.228249	0.662382	-0.192284	0.926811	0.0464689	ENSRNOG00000018899	complement C5(C5)
C8g	0.953317	0.0387479	0.831357	0.200946	0.999979	-0.284281	0.806336	-0.116351	0.760815	0.148837	ENSRNOG00000028701	complement C8 gamma chain(C8g)
Ca11	0.818529	0.246408	0.858756	-0.330481	0.999979	-0.426788	0.436349	-0.591144	0.738949	-0.294805	ENSRNOG00000021017	carbonic anhydrase 11(Car11)
Ca12	0.0153843	-0.749132	0.702369	-0.395765	0.999979	-0.730702	5.15449e-06	-2.04318	0.0107303	-1.23598	ENSRNOG00000017766	carbonic anhydrase 12(Car12)
Ca14	0.582971	0.211972	0.851527	0.114799	0.53499	-0.471512	0.00789119	-0.597485	0.661099	-0.128427	ENSRNOG00000023162	carbonic anhydrase 14(Car14)
Ca5b	na	na	0.898238	0.289893	0.999979	-0.424235	0.427651	-0.692	0.801829	-0.260602	ENSRNOG00000029330	carbonic anhydrase 5B(Ca5b)
Ca6	0.0152272	0.707012	0.830338	-0.140025	0.650812	-0.626252	0.055467	-0.482901	0.680849	0.131749	ENSRNOG00000021355	carbonic anhydrase 6(Car6)
Caap1	0.739424	0.0678445	0.982504	-0.0197238	0.999979	-0.159736	0.768774	0.0688158	0.284258	0.221729	ENSRNOG00000007299	caspase activity and apoptosis inhibitor 1(Caap1)
Cab39	0.0450879	-0.239716	0.789598	-0.102192	0.336717	-0.380431	0.107232	-0.256715	0.555405	0.113139	ENSRNOG00000017297	calcium binding protein 39(Cab39)
Cab39l	0.999145	-0.000221276	0.732795	-0.113623	0.999979	0.184089	0.279063	0.16908	0.850516	-0.0382668	ENSRNOG00000011603	calcium binding protein 39-like(Cab39l)
Cabcoco1	0.000475718	0.770004	0.466431	-0.309871	0.999979	-0.0604308	0.184813	-0.327755	0.3952	-0.235657	ENSRNOG00000000634	similar to RIKEN cDNA 1700040L02(RGD1306739)
Cabin1	0.985076	0.00518016	0.75909	0.177747	0.999979	-0.320924	0.0392752	-0.505001	0.990016	-0.00475891	ENSRNOG00000001237	calcineurin binding protein 1(Cabin1)
Cables2	0.68704	0.245725	0.731299	-0.266772	0.999979	-0.0760338	0.9069	-0.0510085	0.927098	0.0426267	ENSRNOG00000051420	Cdk5 and Abl enzyme substrate 2(Cables2)
Cabp4	0.0710103	-0.541621	0.955259	0.0680332	0.999979	0.151952	0.830413	-0.0886563	0.481147	-0.272884	ENSRNOG00000022044	calcium binding protein 4(Cabp4)
Cabyr	0.726806	0.202682	0.75909	-0.306789	0.999979	-0.410293	0.0887325	-0.742767	0.452133	-0.382713	ENSRNOG00000047436	calcium binding tyrosine phosphorylation regulated(Cabyr)
Cacfd1	0.536374	-0.239903	0.747208	0.161512	0.999979	-0.0118327	6.01758e-06	0.840921	1.35524e-05	0.853991	ENSRNOG00000005840	calcium channel flower domain containing 1(Cacfd1)
Cacna1a	na	na	0.354466	0.970254	0.999979	-0.0710848	0.957071	-0.0478321	0.974298	0.0356929	ENSRNOG00000052707	calcium voltage-gated channel subunit alpha1 A(Cacna1a)
Cacna1d	0.053347	1.34461	0.928479	0.149886	0.999979	0.0743591	0.0204748	1.07551	0.0306642	1.05885	ENSRNOG00000013147	calcium voltage-gated channel subunit alpha1 D(Cacna1d)
Cacna2d2	0.76729	0.306748	0.763304	0.504711	0.848994	0.956156	0.627275	0.414163	0.664651	-0.412209	ENSRNOG00000015835	calcium voltage-gated channel auxiliary subunit alpha2delta 2(Cacna2d2)
Cacnb1	0.318556	0.439559	0.659145	0.369235	0.863759	-0.833629	0.866733	-0.0869716	0.0810636	0.715694	ENSRNOG00000004518	calcium voltage-gated channel auxiliary subunit beta 1(Cacnb1)
Cacnb3	0.9942	0.00381913	0.264724	-0.977894	0.156061	-1.52768	7.94998e-05	-2.14947	0.391879	-0.573119	ENSRNOG00000054274	calcium voltage-gated channel auxiliary subunit beta 3(Cacnb3)
Cactin	0.224046	0.184782	0.42833	0.200782	0.999979	-0.0546596	0.328907	0.156447	0.166242	0.221754	ENSRNOG00000039852	cactin, spliceosome C complex subunit(Cactin)
Cacul1	0.000922414	0.363533	0.973283	-0.0171277	0.999979	-0.0765587	0.331491	0.118692	0.079411	0.20685	ENSRNOG00000009954	CDK2-associated, cullin domain 1(Cacul1)
Cacybp	2.05694e-09	-0.496893	0.456524	-0.200948	0.999979	-0.00802293	0.00724825	-0.391797	0.0106327	-0.39375	ENSRNOG00000002572	calcyclin binding protein(Cacybp)
Cad	0.0414041	-0.424819	0.894695	-0.0777728	0.976701	-0.363403	0.00398732	-0.530801	0.567754	-0.136202	ENSRNOG00000026474	carbamoyl-phosphate synthetase 2, aspartate transcarbamylase, and dihydroorotase(Cad)
Cage1	0.0429523	0.680757	0.700035	-0.420419	0.999979	-0.100183	0.349367	-0.505666	0.412219	-0.475829	ENSRNOG00000024111	cancer antigen 1(Cage1)
Calcoco1	4.96288e-26	1.01711	0.202915	0.325555	0.999979	0.169174	0.00663926	0.457919	0.146483	0.278916	ENSRNOG00000015447	calcium-binding and coiled-coil domain-containing protein 1-like(LOC100912282)
Calcrl	2.48243e-09	0.889742	0.795552	-0.138885	0.999979	0.206291	0.0797837	0.378441	0.434572	0.199206	ENSRNOG00000054695	calcitonin receptor-like(Calcrl)
Calhm2	0.314604	-0.295221	0.0957425	-0.940174	0.350485	-0.966737	0.0738945	-0.769288	0.699426	0.21193	ENSRNOG00000020325	calcium homeostasis modulator 2(Calhm2)
Calhm4	na	0.689337	0.7109	0.458005	0.999979	0.273084	0.364221	0.542532	0.642338	0.325859	ENSRNOG00000000580	family with sequence similarity 26, member D(Fam26d)
Calhm5	3.59398e-06	2.98517	0.976957	0.0715907	0.976701	0.828143	0.388025	0.496578	0.534105	-0.404449	ENSRNOG00000000825	family with sequence similarity 26, member E(Fam26e)
Calhm6	5.30184e-37	1.16796	6.99519e-14	1.02613	0.0828941	1.14611	1.09677e-22	1.29563	0.530903	0.118796	ENSRNOG00000037757	family with sequence similarity 26, member F(Fam26f)
Calm1	0.0474193	-0.150105	0.833429	-0.0643706	0.999979	0.0878384	0.0660361	-0.2162	0.0191586	-0.280559	ENSRNOG00000004060	calmodulin 1(Calm1)
Calm2	0.322245	-0.101103	0.00219754	-0.445355	0.999979	-0.293733	1.02787e-07	-0.650062	0.0137303	-0.34114	ENSRNOG00000030871	-
Calm2	0.0692648	-0.252064	0.174999	-0.203331	0.999979	-0.190306	7.04653e-11	-0.611345	3.90907e-05	-0.419441	ENSRNOG00000016770	calmodulin 3(Calm3)
Calr	0.0891134	-0.252783	0.00337293	0.537967	0.0883182	0.548367	7.06663e-12	1.02192	0.00403447	0.48661	ENSRNOG00000003029	calreticulin(Calr)
Calr3	0.751305	-0.214617	0.719832	-0.377077	0.999979	0.107179	0.903895	0.0728658	0.854448	-0.117936	ENSRNOG00000013260	calreticulin 3(Calr3)
Calu	0.384778	-0.100217	0.869207	-0.0654623	0.999979	0.210191	0.788735	0.0482526	0.268865	-0.175229	ENSRNOG00000006197	calumenin(Calu)
Camk1	0.944036	-0.0388613	0.998999	-0.00403692	0.999979	0.12538	0.217112	-0.334867	0.0866725	-0.475755	ENSRNOG00000021781	calcium/calmodulin-dependent protein kinase I(Camk1)
Camk1d	0.761063	0.0937213	0.945063	0.0578099	0.999979	-0.239599	0.11651	-0.383088	0.562468	-0.170229	ENSRNOG00000017882	calcium/calmodulin-dependent protein kinase ID(Camk1d)
Camk2b	0.846896	0.159918	0.762975	0.335353	0.999979	-0.0351697	0.366082	0.46342	0.358449	0.496579	ENSRNOG00000052080	calcium/calmodulin-dependent protein kinase II beta(Camk2b)
Camk2d	0.0107418	0.320655	0.0265312	0.46794	0.912967	0.231943	0.11864	0.285572	0.856198	0.0450428	ENSRNOG00000011589	calcium/calmodulin-dependent protein kinase II delta(Camk2d)
Camk2g	4.47597e-07	0.649224	0.779682	0.0733489	0.999979	-0.131089	9.28414e-12	-0.657893	3.74298e-07	-0.529621	ENSRNOG00000009783	calcium/calmodulin-dependent protein kinase II gamma(Camk2g)
Camk4	3.84961e-07	0.533259	0.0731841	-0.307489	0.556546	-0.381608	0.417736	0.121582	7.62957e-05	0.507855	ENSRNOG00000020478	calcium/calmodulin-dependent protein kinase IV(Camk4)
Camkk1	0.0320279	0.464865	0.954783	0.0516338	0.999979	-0.208892	0.000911399	-0.755057	0.036272	-0.523674	ENSRNOG00000018242	calcium/calmodulin-dependent protein kinase kinase 1(Camkk1)
Camkk2	0.82372	-0.103488	0.927976	0.0876359	0.999979	-0.23117	0.0264644	-0.645491	0.208076	-0.412396	ENSRNOG00000001309	calcium/calmodulin-dependent protein kinase kinase 2(Camkk2)
Camkmt	0.23233	-0.286646	0.823617	-0.100358	0.999979	-0.13313	0.00539583	-0.467806	0.0593885	-0.349097	ENSRNOG00000030629	-
Camlg	0.887685	-0.0291265	0.465026	0.156504	0.999979	-0.0135598	0.0226215	0.263918	0.023051	0.277225	ENSRNOG00000021911	calcium modulating ligand(Camlg)
Camsap1	0.14434	0.325661	0.998999	-0.00220731	0.999979	-0.134508	0.773073	0.0667967	0.368507	0.18867	ENSRNOG00000017883	calmodulin regulated spectrin-associated protein 1(Camsap1)
Camsap2	0.575843	-0.134652	0.910046	0.0666713	0.999979	-0.246741	0.195514	-0.255595	0.983874	0.00619846	ENSRNOG00000008741	calmodulin regulated spectrin-associated protein family, member 2(Camsap2)
Camta1	0.952151	-0.0162906	0.939546	-0.0418901	0.999979	-0.064919	0.00577651	-0.421468	0.043062	-0.336443	ENSRNOG00000018602	calmodulin binding transcription activator 1(Camta1)
Camta2	0.651637	0.130184	0.613029	0.275326	0.999979	-0.166012	0.631393	0.154268	0.388379	0.268329	ENSRNOG00000004283	calmodulin binding transcription activator 2(Camta2)
Cand1	0.518095	0.0804271	0.877955	-0.0644913	0.999979	0.0241908	0.0191652	-0.33248	0.0129982	-0.367842	ENSRNOG00000007834	cullin-associated and neddylation-dissociated 1(Cand1)
Cand2	na	-0.451092	0.998999	0.00965032	0.673703	1.06958	0.738257	-0.314539	0.0945509	-1.45961	ENSRNOG00000010473	cullin-associated and neddylation-dissociated 2 (putative)(Cand2)
Cant1	0.155852	0.245532	0.531732	0.228791	0.999979	0.220026	0.00496746	0.512273	0.0865891	0.348181	ENSRNOG00000003239	calcium activated nucleotidase 1(Cant1)
Canx	0.00833413	0.191067	0.337719	0.240107	0.042279	0.530623	1.6311e-07	0.729545	0.321184	0.177159	ENSRNOG00000003343	calnexin(Canx)
Cap1	0.128834	-0.129465	0.0200725	-0.277239	0.999979	-0.122888	2.22565e-14	-0.68232	2.64823e-09	-0.564826	ENSRNOG00000013492	adenylate cyclase associated protein 1(Cap1)
Capg	0.233917	0.353085	2.3012e-10	-2.58859	0.5966	-1.22567	3.1219e-09	-2.32604	0.0921622	-0.768673	ENSRNOG00000013668	capping actin protein, gelsolin like(Capg)
Capn1	0.973636	0.00790117	0.676455	0.159759	0.999979	-0.166279	0.289753	-0.203209	0.946858	-0.017162	ENSRNOG00000020935	calpain 1(Capn1)
Capn10	0.222132	0.220512	0.869207	0.10767	0.687812	-0.627514	0.715807	-0.104818	0.0343835	0.498882	ENSRNOG00000045623	calpain 10(Capn10)
Capn15	0.937625	0.0568679	0.430568	0.526739	0.999979	-0.214966	0.963857	0.0234476	0.699317	0.195449	ENSRNOG00000020239	calpain 15(Capn15)
Capn2	0.234056	0.349691	0.304006	-0.380274	0.999979	-0.207024	1.35578e-05	-0.951871	0.00414862	-0.680649	ENSRNOG00000034015	calpain 2(Capn2)
Capn5	0.000317326	0.682379	0.297016	0.518873	0.999979	0.249357	0.986351	-0.00786103	0.707923	-0.15704	ENSRNOG00000014251	calpain 5(Capn5)
Capn7	0.000283288	0.392012	0.999677	-0.00106871	0.907687	-0.135459	0.309139	0.122957	0.0220644	0.260059	ENSRNOG00000019273	calpain 7(Capn7)
Capns1	0.962011	0.0345978	0.905024	-0.153808	0.976405	-0.536095	0.304565	-0.465346	0.94638	0.0400493	ENSRNOG00000045747	calpain, small subunit 1(Capns1)
Caprin1	0.579086	-0.0647005	0.754359	0.11377	0.704298	0.291685	0.98643	-0.0037555	0.0724609	-0.294149	ENSRNOG00000009152	cell cycle associated protein 1(Caprin1)
Caprin2	0.651918	0.380301	0.980567	-0.0698014	0.999979	0.140798	0.621416	-0.370134	0.490324	-0.52044	ENSRNOG00000047319	-
Capza1	0.75428	0.0369773	0.212832	-0.233452	0.999979	0.0599542	0.000392305	-0.422537	6.08803e-05	-0.494362	ENSRNOG00000013538	capping actin protein of muscle Z-line alpha subunit 1(Capza1)
Capza2	0.999532	6.86839e-05	0.286355	-0.179619	0.999979	0.174562	0.205745	-0.145602	0.00228543	-0.329709	ENSRNOG00000056207	capping actin protein of muscle Z-line alpha subunit 2(Capza2)
Capzb	0.123923	-0.133663	0.202026	-0.157992	0.999979	-0.0875669	2.2901e-19	-0.665703	1.04444e-13	-0.579254	ENSRNOG00000007330	capping actin protein of muscle Z-line beta subunit(Capzb)
Car2	2.74641e-20	1.14084	0.327869	-0.331837	0.999979	0.10341	0.175777	0.298357	0.274696	0.261227	ENSRNOG00000009629	carbonic anhydrase 2(Car2)
Card19	0.124104	0.354988	0.5134	-0.261835	0.312498	-0.472582	0.0421195	-0.431122	0.938944	0.0233357	ENSRNOG00000016560	caspase recruitment domain family, member 19(Card19)
Card6	0.000597376	0.40096	0.441557	0.219266	0.999979	0.286397	2.5885e-05	0.621112	0.0244994	0.374032	ENSRNOG00000001271	caspase recruitment domain family, member 6(Card6)
Carf	0.0327846	0.6172	0.998104	-0.00835205	0.996137	0.460104	0.387079	0.387072	0.871803	-0.0909181	ENSRNOG00000017491	calcium responsive transcription factor(Carf)
Carhsp1	3.58261e-09	0.597855	0.859546	-0.090529	0.988424	-0.229252	0.205984	-0.245539	0.919157	-0.0264331	ENSRNOG00000002610	calcium regulated heat stable protein 1(Carhsp1)
Carm1	0.036198	-0.36713	0.93062	0.072894	0.0143071	-0.833483	0.0399076	-0.499032	0.291412	0.290663	ENSRNOG00000031129	coactivator-associated arginine methyltransferase 1(Carm1)
Carmil1	na	-0.091156	0.460447	-1.6934	0.704238	-1.84111	0.210056	-1.68479	0.715452	-0.583846	ENSRNOG00000016576	capping protein regulator and myosin 1 linker 1(Carmil1)
Carmil2	9.05669e-05	0.375566	0.895122	0.0787982	0.999979	-0.235201	0.976322	-0.00802635	0.405216	0.19197	ENSRNOG00000024452	capping protein regulator and myosin 1 linker 2(Carmil2)
Carnmt1	0.950465	0.0238368	0.76651	0.154125	0.999979	-0.123622	0.819726	-0.0652639	0.757545	0.0911659	ENSRNOG00000012872	carnosine N-methyltransferase 1(Carnmt1)
Carns1	0.173076	0.832426	0.993206	0.0287985	0.999979	-0.0155982	0.077176	-1.0247	0.113578	-0.980273	ENSRNOG00000018603	carnosine synthase 1(Carns1)
Cars	0.602055	-0.0905263	0.174352	0.367487	0.0374133	0.564117	7.5735e-10	1.03721	0.0121302	0.485885	ENSRNOG00000020651	cysteinyl-tRNA synthetase(Cars)
Cars2	0.0128726	-0.4801	0.906137	-0.0971408	0.960261	-0.344882	1.50901e-05	-1.0651	0.00446116	-0.759992	ENSRNOG00000014526	cysteinyl-tRNA synthetase 2, mitochondrial(Cars2)
Casc1	0.677212	0.16679	0.00489502	0.646436	0.156337	0.5593	6.36804e-11	1.17326	0.00232436	0.631133	ENSRNOG00000027630	cancer susceptibility candidate 1(Casc1)
Casc3	0.0481607	0.281039	0.644566	0.126469	0.999979	-0.161574	0.464013	-0.108596	0.694774	0.0666031	ENSRNOG00000009716	cancer susceptibility candidate 3(Casc3)
Casc4	0.939036	-0.0455072	0.996282	-0.00784343	0.999979	-0.111274	0.68112	-0.134925	0.989366	0.00535926	ENSRNOG00000016357	cancer susceptibility candidate 4(Casc4)
Casd1	6.54361e-06	0.658985	0.990665	-0.0120684	0.999979	-0.00143432	0.235556	0.209267	0.351012	0.180291	ENSRNOG00000047453	-
Cask	na	-0.713281	0.954962	-0.155706	0.999979	0.0660091	0.700931	0.335149	0.821011	0.223173	ENSRNOG00000060946	calcium/calmodulin dependent serine protein kinase(Cask)
Casp1	0.419663	0.095151	0.0834284	0.241225	0.242651	0.523024	5.21212e-14	0.705523	0.134983	0.175092	ENSRNOG00000007372	caspase 1(Casp1)
Casp2	0.000215657	0.372579	0.601934	0.137764	0.999979	0.103343	0.614428	-0.0791101	0.195789	-0.187004	ENSRNOG00000016707	caspase 2(Casp2)
Casp3	0.00453019	-0.238262	0.143951	0.345508	0.687812	0.501056	6.7448e-10	0.939865	0.00717109	0.465801	ENSRNOG00000010475	caspase 3(Casp3)
Casp4	2.08885e-07	-0.428	0.484018	0.178241	0.0774334	0.558536	8.57803e-17	1.00527	0.00133958	0.441316	ENSRNOG00000033697	caspase 4(Casp4)
Casp6	0.982686	0.00587209	0.939546	0.0506567	0.931882	-0.220186	0.841899	-0.0492824	0.439524	0.174267	ENSRNOG00000009508	caspase-6(LOC103689977)
Casp7	0.730214	-0.0868865	0.10396	0.474336	0.0907863	0.778472	0.000115643	0.77967	0.887069	-0.0440198	ENSRNOG00000056216	caspase 7(Casp7)
Casp8	0.000476093	0.401285	0.723626	0.0942604	0.29379	0.396297	0.00151378	0.349141	0.785881	-0.0435398	ENSRNOG00000012331	caspase 8(Casp8)
Casp8ap2	0.856906	-0.0245695	0.486688	0.157054	0.948447	0.262921	0.00113058	0.378124	0.446354	0.11261	ENSRNOG00000006487	caspase 8 associated protein 2(Casp8ap2)
Casp9	0.736995	0.0751632	0.797469	-0.102916	0.999979	0.0715985	0.553995	-0.111777	0.35971	-0.171598	ENSRNOG00000012944	caspase 9(Casp9)
Casq1	na	na	0.640046	0.673713	0.999979	-0.121284	0.278887	0.790808	0.232118	0.905146	ENSRNOG00000006930	calsequestrin 1(Casq1)
Cass4	0.838261	0.1099	0.74978	-0.245853	0.999979	0.0563225	0.857712	-0.0754957	0.740571	-0.143563	ENSRNOG00000021560	Cas scaffolding protein family member 4(Cass4)
Cast	0.795304	-0.0332217	3.30642e-08	-0.652113	0.928336	-0.23716	1.70895e-07	-0.594492	0.00399938	-0.363384	ENSRNOG00000010286	calpastatin(Cast)
Castor1	0.274573	0.42523	0.823617	-0.144438	0.999979	-0.0430986	0.000832412	-0.817538	0.00327103	-0.769416	ENSRNOG00000006740	GATS protein-like 3(Gatsl3)
Casz1	na	0.576684	0.301135	1.23125	0.266778	2.38266	0.00305059	2.08353	0.893775	-0.150802	ENSRNOG00000013474	castor zinc finger 1(Casz1)
Cat	0.400586	-0.129122	0.491028	-0.206928	0.999979	-0.0997779	0.00460241	-0.444015	0.0360878	-0.356972	ENSRNOG00000008364	catalase(Cat)
Catsper2	0.894701	-0.0782839	0.75051	0.208341	0.912772	0.312947	0.041545	0.546159	0.565287	0.19823	ENSRNOG00000023064	cation channel, sperm associated 2(Catsper2)
Catsperd	0.470905	0.346804	0.788773	0.306531	0.641007	-0.741134	0.634032	-0.270844	0.480151	0.393424	ENSRNOG00000048818	cation channel sperm associated auxiliary subunit delta(Catsperd)
Catsperg	0.0603745	-0.332363	0.0106206	-0.879264	0.156061	-0.826958	8.38786e-10	-1.6934	0.00758621	-0.819467	ENSRNOG00000060693	cation channel sperm associated auxiliary subunit gamma(Catsperg)
Cav2	0.00221044	1.24975	0.562563	-0.773887	0.999979	-0.625924	0.185007	-0.951748	0.601831	-0.444309	ENSRNOG00000057713	caveolin 2(Cav2)
Cavin1	3.80258e-25	-1.05505	2.26453e-20	-1.99139	0.0904432	-1.41781	2.86359e-30	-2.43056	1.81094e-08	-1.27293	ENSRNOG00000019778	polymerase I and transcript release factor(Ptrf)
Cbarp	0.821872	0.147972	0.675787	0.362551	0.999979	-0.375828	0.16119	-0.605427	0.592007	-0.274214	ENSRNOG00000024349	CACN beta subunit associated regulatory protein(Cbarp)
Cbfa2t2	0.0667522	0.51561	0.778501	0.138397	0.999979	-0.00567133	0.110488	0.325776	0.154394	0.311681	ENSRNOG00000016352	CBFA2/RUNX1 translocation partner 2(Cbfa2t2)
Cbfa2t3	0.0711696	-1.17204	0.120352	-1.87945	0.260053	-2.11216	0.000763204	-3.15353	0.353203	-0.907791	ENSRNOG00000014723	CBFA2/RUNX1 translocation partner 3(Cbfa2t3)
Cbfb	0.537164	0.0672691	0.907961	-0.0510109	0.999979	0.195049	0.513219	-0.105738	0.0193263	-0.334399	ENSRNOG00000014647	core-binding factor, beta subunit(Cbfb)
Cbl	0.0323551	0.510331	0.593875	0.182257	0.999979	0.0125328	0.000855741	0.518407	0.000638672	0.554958	ENSRNOG00000008444	Cbl proto-oncogene(Cbl)
Cblb	0.000560436	0.364693	2.79753e-05	0.732573	0.00821519	0.607683	3.06863e-09	0.935497	0.0733381	0.336826	ENSRNOG00000001982	Cbl proto-oncogene B(Cblb)
Cbll1	0.799998	0.0372062	0.998578	0.00226458	0.999979	0.109812	0.388895	0.111071	0.968395	0.00724263	ENSRNOG00000007253	Cbl proto-oncogene like 1(Cbll1)
Cbr1	0.0100161	-1.06555	0.825855	-0.29037	0.940291	-0.63995	0.233016	-0.64546	0.857885	0.126149	ENSRNOG00000047848	carbonyl reductase 1(Cbr1)
Cbr4	0.429808	-0.281328	0.7128	-0.335647	0.982308	0.462102	0.443538	-0.350192	0.0221641	-0.969613	ENSRNOG00000024411	carbonyl reductase 4(Cbr4)
Cbwd1	0.442442	-0.134866	0.913235	-0.0513177	0.999979	0.173166	0.455964	0.124466	0.677523	-0.0797687	ENSRNOG00000015516	COBW domain containing 1(Cbwd1)
Cbx1	0.325483	-0.283208	0.910046	0.0877441	0.999979	-0.1188	0.65642	0.132861	0.480993	0.208215	ENSRNOG00000008689	chromobox 1(Cbx1)
Cbx2	2.17868e-14	0.706665	0.828733	0.100888	0.999979	0.0708882	0.226854	0.229477	0.294859	0.213659	ENSRNOG00000049215	chromobox 2(Cbx2)
Cbx3	0.0323282	-0.417795	0.788579	-0.12802	0.582006	-0.415473	0.00250375	-0.559807	0.455399	-0.173034	ENSRNOG00000011814	chromobox 3(Cbx3)
Cbx4	0.514717	0.189901	0.71358	0.201003	0.999979	0.240472	0.447303	0.207817	0.942345	-0.0252605	ENSRNOG00000046207	chromobox 4(Cbx4)
Cbx5	0.0242029	-0.332941	0.830338	0.0886125	0.999979	0.359899	0.0555005	0.300869	0.60896	-0.10248	ENSRNOG00000036841	chromobox 5(Cbx5)
Cbx6	0.710413	-0.185462	0.993716	0.0158673	0.999979	0.114186	0.73416	-0.137892	0.40377	-0.318128	ENSRNOG00000046955	chromobox 6(Cbx6)
Cbx7	1.28226e-06	0.820303	0.672661	0.290733	0.999979	-0.106613	0.469512	-0.263228	0.52501	-0.248423	ENSRNOG00000016875	chromobox 7(Cbx7)
Cbx8	0.670736	0.12839	0.985928	-0.0191016	0.849463	-0.240298	0.154842	-0.284407	0.880562	-0.0400432	ENSRNOG00000048113	chromobox 8(Cbx8)
Cby1	0.508815	-0.457229	0.699116	-0.405448	0.999979	0.1862	0.560783	-0.317853	0.341625	-0.523342	ENSRNOG00000013892	chibby family member 1, beta catenin antagonist(Cby1)
Cc2d1a	0.10795	0.307891	0.191739	0.430694	0.999979	-0.0694324	0.0612104	0.42912	0.0333411	0.503157	ENSRNOG00000006747	coiled-coil and C2 domain containing 1A(Cc2d1a)
Cc2d1b	0.545629	0.105038	0.637851	0.142973	0.999979	-0.0968491	0.540295	0.103191	0.201077	0.204005	ENSRNOG00000008634	coiled-coil and C2 domain containing 1B(Cc2d1b)
Ccar1	0.75267	0.0493552	0.851775	-0.0800586	0.999979	0.0959024	0.631393	-0.0914731	0.375676	-0.16306	ENSRNOG00000000397	cell division cycle and apoptosis regulator 1(Ccar1)
Ccar2	0.980726	-0.00583555	0.608065	0.188906	0.999979	-0.0873325	0.0344748	-0.377833	0.227176	-0.244648	ENSRNOG00000018295	cell cycle and apoptosis regulator 2(Ccar2)
Ccdc102a	0.795783	-0.132957	0.992795	0.0270087	0.999979	-0.0688219	0.0279861	-1.04082	0.0447381	-1.01266	ENSRNOG00000025843	coiled-coil domain containing 102A(Ccdc102a)
Ccdc107	0.00017016	0.561617	0.642991	-0.151747	0.547514	-0.394564	0.953685	0.0118549	0.0150195	0.381945	ENSRNOG00000017253	coiled-coil domain containing 107(Ccdc107)
Ccdc112	0.962955	-0.0332738	0.88981	-0.165088	0.999979	-0.142343	0.44331	-0.344034	0.609863	-0.254696	ENSRNOG00000003559	coiled-coil domain containing 112(Ccdc112)
Ccdc114	na	na	0.753384	0.454164	0.751273	-0.883856	0.661784	0.328858	0.0534172	1.21248	ENSRNOG00000021109	coiled-coil domain containing 114(Ccdc114)
Ccdc115	0.0316256	0.214919	0.376981	0.157193	0.999979	0.104028	0.181325	0.149183	0.696605	0.0543551	ENSRNOG00000013234	coiled-coil domain containing 115(Ccdc115)
Ccdc117	1.62339e-05	0.671652	0.721591	0.137864	0.999979	0.0910529	0.0257032	0.370518	0.178635	0.252495	ENSRNOG00000010706	coiled-coil domain containing 117(Ccdc117)
Ccdc12	0.00144115	-0.355137	0.669493	-0.125768	0.999979	-0.238148	0.507172	-0.104319	0.282457	0.166365	ENSRNOG00000020946	coiled-coil domain containing 12(Ccdc12)
Ccdc120	0.845536	-0.0794282	0.270301	0.486161	0.999979	0.270845	0.0503803	0.5587	0.265133	0.362984	ENSRNOG00000009687	coiled-coil domain containing 120(Ccdc120)
Ccdc124	0.000445899	-0.393223	0.894938	-0.0693334	0.980074	-0.221365	0.895362	-0.0301404	0.333024	0.191917	ENSRNOG00000018932	coiled-coil domain containing 124(Ccdc124)
Ccdc125	0.745465	0.15481	0.562169	-0.497615	0.999979	0.12714	0.0346765	-0.924238	0.021638	-1.05637	ENSRNOG00000027410	coiled-coil domain containing 125(Ccdc125)
Ccdc126	0.22388	0.215703	0.927834	0.0583667	0.664705	0.401669	0.000200979	0.646544	0.266613	0.237591	ENSRNOG00000009322	coiled-coil domain containing 126(Ccdc126)
Ccdc127	0.59772	-0.102536	0.729355	0.0993607	0.999979	0.0983657	0.0637679	0.230586	0.33867	0.138288	ENSRNOG00000012775	coiled-coil domain containing 127(Ccdc127)
Ccdc130	0.0148904	0.366064	0.961657	0.0209127	0.999979	0.087011	2.11635e-05	0.408712	0.00212053	0.322079	ENSRNOG00000008319	coiled-coil domain containing 130(Ccdc130)
Ccdc134	0.111964	-0.311837	0.119331	0.377439	0.999979	0.076507	0.213532	0.236781	0.458689	0.161073	ENSRNOG00000007262	coiled-coil domain containing 134(Ccdc134)
Ccdc136	0.584153	0.206907	0.638695	0.344361	0.935343	0.448822	0.0184761	-0.824207	0.000264011	-1.31209	ENSRNOG00000007100	coiled-coil domain containing 136(Ccdc136)
Ccdc137	0.501875	0.0941616	0.958606	-0.0329401	0.999979	0.0123187	0.931166	-0.0182176	0.853096	-0.0417834	ENSRNOG00000048712	coiled-coil domain containing 137(Ccdc137)
Ccdc138	0.871224	0.142866	0.803669	-0.288131	0.476559	-0.827876	0.19863	-0.632555	0.71216	0.21519	ENSRNOG00000028581	coiled-coil domain containing 138(Ccdc138)
Ccdc14	0.801687	-0.0773003	0.460161	-0.409596	0.999659	0.32718	0.138792	-0.475747	0.00718501	-0.850613	ENSRNOG00000021469	coiled-coil domain containing 14(Ccdc14)
Ccdc142	0.164004	2.96615	0.261882	0.758799	0.999979	0.0153598	0.533216	0.324671	0.501155	0.364078	ENSRNOG00000022326	coiled-coil domain containing 142(Ccdc142)
Ccdc15	0.150673	0.630165	0.607831	0.332293	0.95164	0.315758	0.00249736	0.887007	0.091064	0.563293	ENSRNOG00000032180	coiled-coil domain containing 15(Ccdc15)
Ccdc150	0.971173	-0.030164	0.457147	0.490555	0.999979	0.133989	0.684968	0.187155	0.897488	0.0685157	ENSRNOG00000013318	coiled-coil domain containing 150(Ccdc150)
Ccdc155	na	na	0.485992	-0.81882	0.867376	-0.832803	0.275376	0.651495	0.00882575	1.41768	ENSRNOG00000025378	coiled-coil domain containing 155(Ccdc155)
Ccdc163	0.759357	0.198435	0.935325	-0.090482	0.999979	-0.101541	0.441137	-0.281277	0.714227	-0.154968	ENSRNOG00000022953	coiled-coil domain containing 163(Ccdc163)
Ccdc167	0.235532	-0.344476	0.959134	-0.0410262	0.999979	0.0279802	0.0168062	-0.480881	0.0287673	-0.470631	ENSRNOG00000000531	coiled-coil domain containing 167(Ccdc167)
Ccdc17	0.962414	-0.0178172	0.973283	-0.0358097	0.931882	-0.388647	0.209308	0.307583	0.00561738	0.641065	ENSRNOG00000023216	coiled-coil domain containing 17(Ccdc17)
Ccdc174	0.320839	0.157477	0.979188	-0.0132808	0.999979	0.0572174	0.56216	0.0736823	0.855384	0.0275954	ENSRNOG00000010090	coiled-coil domain containing 174(Ccdc174)
Ccdc175	0.785353	0.160423	0.930859	-0.104143	0.999979	0.154344	0.833046	0.0946974	0.844831	-0.0957938	ENSRNOG00000004774	coiled-coil domain containing 175(Ccdc175)
Ccdc18	0.786803	0.128261	0.857493	-0.268362	0.706251	0.755538	0.537586	0.3857	0.458174	-0.48187	ENSRNOG00000024545	coiled-coil domain containing 18(Ccdc18)
Ccdc181	0.113986	-0.31408	0.199178	-0.279282	0.999979	0.0678663	0.635419	-0.0846113	0.322757	-0.169367	ENSRNOG00000002860	coiled-coil domain containing 181(Ccdc181)
Ccdc186	0.0149935	0.470984	0.302779	0.265892	0.848994	0.308642	2.60147e-11	0.93924	7.81813e-05	0.616608	ENSRNOG00000051680	coiled-coil domain containing 186(Ccdc186)
Ccdc191	0.39048	-0.304319	0.541371	0.319282	0.999979	0.116823	0.297533	0.303949	0.640607	0.162669	ENSRNOG00000057815	coiled-coil domain containing 191(Ccdc191)
Ccdc22	0.995684	0.00117925	0.78172	0.102206	0.999979	0.0905491	0.75244	0.060666	0.963024	-0.0106706	ENSRNOG00000010846	coiled-coil domain containing 22(Ccdc22)
Ccdc25	0.339047	-0.129446	0.960887	0.0276948	0.999979	0.163105	0.482311	0.111988	0.714349	-0.067253	ENSRNOG00000015939	coiled-coil domain containing 25(Ccdc25)
Ccdc28a	0.014271	0.378336	0.710919	0.121743	0.999979	0.198809	3.39237e-06	0.604982	0.00380919	0.41661	ENSRNOG00000053347	coiled-coil domain containing 28A(Ccdc28a)
Ccdc28b	0.982393	0.00667753	0.973283	-0.0248945	0.999979	0.00767864	0.000455038	-0.540675	0.00121947	-0.52968	ENSRNOG00000047578	coiled coil domain containing 28B(Ccdc28b)
Ccdc32	0.916531	0.0174315	0.976701	0.0112888	0.999979	0.0993956	0.00398803	0.222559	0.16398	0.124756	ENSRNOG00000010472	coiled-coil domain containing 32(Ccdc32)
Ccdc34	0.204837	-0.402598	0.63005	-0.233553	0.999979	-0.109939	0.0584344	-0.440047	0.361507	-0.24585	ENSRNOG00000005902	coiled-coil domain containing 34(Ccdc34)
Ccdc39	0.957843	-0.0392781	0.901872	-0.222508	0.999979	-0.40049	0.546328	0.403203	0.417241	0.544585	ENSRNOG00000011440	coiled-coil domain containing 39(Ccdc39)
Ccdc43	0.0629831	-0.224405	0.419977	-0.193403	0.999979	0.0112145	0.0369565	-0.287639	0.0272905	-0.317591	ENSRNOG00000002748	coiled-coil domain containing 43(Ccdc43)
Ccdc47	0.36282	0.104077	0.935325	-0.0267216	0.999979	0.0974591	0.0217653	0.21403	0.290868	0.115186	ENSRNOG00000009006	coiled-coil domain containing 47(Ccdc47)
Ccdc50	0.249135	-0.330168	0.541866	-0.367936	0.999979	-0.247745	0.724367	-0.138164	0.979471	0.0128579	ENSRNOG00000001930	coiled-coil domain containing 50(Ccdc50)
Ccdc51	0.580154	-0.180937	0.98662	-0.0255118	0.999979	0.0511862	0.40634	0.239476	0.678015	0.139705	ENSRNOG00000020688	coiled-coil domain containing 51(Ccdc51)
Ccdc57	0.172236	-0.607634	0.638695	-0.323372	0.984067	0.310717	0.900802	0.0518281	0.485789	-0.27259	ENSRNOG00000047531	-
Ccdc58	3.7494e-08	-0.674664	0.444959	-0.171443	0.999979	-0.126267	0.0428126	-0.256513	0.294129	-0.153018	ENSRNOG00000031653	coiled-coil domain containing 58(Ccdc58)
Ccdc59	0.331627	-0.226272	0.998999	-0.00202465	0.999979	0.0829283	0.0759496	0.287025	0.35662	0.173492	ENSRNOG00000004183	coiled-coil domain containing 59(Ccdc59)
Ccdc6	na	na	0.756686	0.493442	0.999979	0.265517	0.957998	-0.0480072	0.673873	-0.389498	ENSRNOG00000024019	coiled-coil domain containing 6(Ccdc6)
Ccdc61	0.0674881	0.43194	0.89043	-0.109876	0.849463	-0.581635	0.784118	0.0925181	0.0448283	0.544073	ENSRNOG00000013767	coiled-coil domain containing 61(Ccdc61)
Ccdc62	0.007743	0.540088	0.921247	0.0573518	0.999979	0.0789974	0.0142707	0.412596	0.052395	0.353898	ENSRNOG00000038002	coiled-coil domain containing 62(Ccdc62)
Ccdc66	0.900187	-0.0245895	0.832116	-0.0548969	0.999979	0.0383413	0.32322	0.10574	0.662523	0.0551827	ENSRNOG00000028380	coiled-coil domain containing 66(Ccdc66)
Ccdc69	0.000506427	0.408998	0.996501	-0.00325805	0.999979	-0.00468678	0.0193944	-0.266474	0.0372467	-0.253456	ENSRNOG00000021370	coiled-coil domain containing 69(Ccdc69)
Ccdc71	0.29022	0.31421	0.638948	0.242061	0.999979	0.0865984	0.0340339	0.506095	0.193092	0.351297	ENSRNOG00000048718	coiled-coil domain containing 71(Ccdc71)
Ccdc77	0.860605	-0.0527655	0.80148	0.129461	0.999979	0.0402867	0.0379078	0.417257	0.0952294	0.363357	ENSRNOG00000037206	coiled-coil domain containing 77(Ccdc77)
Ccdc80	na	-1.30512	0.362352	1.44193	0.871535	-1.25362	0.599906	-0.676624	0.609863	0.628802	ENSRNOG00000002052	coiled-coil domain containing 80(Ccdc80)
Ccdc82	0.189065	0.129547	0.124517	-0.264169	0.999979	0.054681	0.0050434	-0.341407	0.00189577	-0.391677	ENSRNOG00000005713	coiled-coil domain containing 82(Ccdc82)
Ccdc84	0.0175867	0.471285	0.978395	0.0219438	0.999979	-0.0175548	0.864765	0.0375129	0.779597	0.0640389	ENSRNOG00000012137	coiled-coil domain containing 84(Ccdc84)
Ccdc86	9.3613e-05	-0.370254	0.910183	-0.0517781	0.999979	-0.113784	0.444143	-0.126161	0.994454	0.00154024	ENSRNOG00000020925	coiled-coil domain containing 86(Ccdc86)
Ccdc88a	0.263931	-0.800734	0.813802	-0.362133	0.312498	-1.11969	0.907631	-0.0919101	0.106303	1.00166	ENSRNOG00000004057	coiled coil domain containing 88A(Ccdc88a)
Ccdc88b	0.609578	0.110099	0.107732	0.497159	0.999979	-0.476294	0.106264	0.383763	0.000480419	0.787857	ENSRNOG00000024931	coiled-coil domain containing 88B(Ccdc88b)
Ccdc88c	0.451579	0.119981	0.877955	-0.110826	0.997128	-0.410647	0.813575	-0.0770137	0.271177	0.311445	ENSRNOG00000004482	coiled-coil domain containing 88C(Ccdc88c)
Ccdc9	0.320666	0.360966	0.996282	-0.00705707	0.999979	-0.275986	0.88895	-0.0426733	0.327947	0.256848	ENSRNOG00000048848	coiled-coil domain containing 9(Ccdc9)
Ccdc90b	0.189615	-0.176889	0.616815	-0.132904	0.976037	0.267694	0.251944	-0.157711	0.000756846	-0.430275	ENSRNOG00000009462	coiled-coil domain containing 90B(Ccdc90b)
Ccdc91	0.83698	-0.0441166	0.31281	-0.219882	0.999979	-0.168708	0.122943	-0.216769	0.681692	-0.0723852	ENSRNOG00000001847	coiled-coil domain containing 91(Ccdc91)
Ccdc92	0.0391134	-0.783606	0.951443	-0.0658755	0.999979	-0.285204	0.37206	-0.282055	0.916052	-0.042422	ENSRNOG00000021691	coiled-coil domain containing 92(Ccdc92)
Ccdc93	0.269273	-0.185227	0.692842	0.125472	0.722461	0.179247	3.25462e-05	0.53869	0.0147978	0.354225	ENSRNOG00000002514	coiled-coil domain containing 93(Ccdc93)
Ccdc97	0.893598	-0.0317375	0.907961	0.0681809	0.999979	0.0249309	0.180718	0.259888	0.192633	0.267645	ENSRNOG00000020675	coiled-coil domain containing 97(Ccdc97)
Cchcr1	0.00717503	-0.289133	0.822463	0.115514	0.938425	-0.219813	0.331254	0.21235	0.04728	0.412302	ENSRNOG00000050233	coiled-coil alpha-helical rod protein 1(Cchcr1)
Ccl1	0.378287	-0.592136	6.8646e-05	-4.15677	0.0459431	-4.82412	9.51988e-09	-6.09886	0.00586584	-2.60542	ENSRNOG00000021851	C-C motif chemokine ligand 1(Ccl1)
Ccl20	0.287306	0.618317	0.0127346	-3.4163	0.400277	-2.43075	0.0154141	-2.77456	0.304278	-1.35675	ENSRNOG00000015992	C-C motif chemokine ligand 20(Ccl20)
Ccl22	0.557586	0.349137	0.791342	-0.565131	0.0004244	-3.10252	0.135263	-1.34506	0.233271	1.14275	ENSRNOG00000016535	C-C motif chemokine ligand 22(Ccl22)
Ccl24	na	na	0.375985	-1.40313	0.999979	0.166222	0.366614	-0.898622	0.253576	-1.19475	ENSRNOG00000031162	C-C motif chemokine ligand 24(Ccl24)
Ccl3	0.101434	0.972021	0.941068	0.155219	0.628025	-0.921541	0.00184366	1.7043	1.9953e-06	2.59049	ENSRNOG00000011205	C-C motif chemokine ligand 3(Ccl3)
Ccl4	0.046153	0.927514	0.284906	0.839904	0.886781	0.535575	6.65726e-05	1.84397	0.011204	1.30029	ENSRNOG00000011406	C-C motif chemokine ligand 4(Ccl4)
Ccm2	4.29728e-06	0.531322	0.435281	0.130331	0.999979	-0.0924442	0.104602	0.158615	0.00899402	0.252121	ENSRNOG00000060825	CCM2 scaffolding protein(Ccm2)
Ccn3	0.180312	1.09922	0.066229	-1.72408	0.999979	0.232217	0.89845	-0.116596	0.519803	-0.54665	ENSRNOG00000008697	nephroblastoma overexpressed(Nov)
Ccn6	0.210562	0.919003	0.704187	-0.422016	0.999979	-0.00715429	0.102139	-0.842367	0.0895949	-0.925072	ENSRNOG00000000597	WNT1 inducible signaling pathway protein 3(Wisp3)
Ccna2	0.683375	-0.225378	0.222001	-1.27557	na	-0.460425	7.21443e-08	-3.82645	0.000152588	-2.73747	ENSRNOG00000015423	cyclin A2(Ccna2)
Ccnb1	0.0618832	-0.429878	0.803669	-0.204561	na	-0.167099	0.00601329	-0.871404	0.025462	-0.762097	ENSRNOG00000058539	cyclin B1(Ccnb1)
Ccnb1ip1	0.320672	-0.305755	0.998999	0.00336859	0.999979	0.206376	0.493073	0.190817	0.853581	-0.0635098	ENSRNOG00000026056	cyclin B1 interacting protein 1(Ccnb1ip1)
Ccnc	0.591276	-0.102145	0.793857	-0.119567	0.999979	0.181767	0.114813	0.296273	0.637275	0.11032	ENSRNOG00000007719	cyclin C(Ccnc)
Ccnd2	9.9638e-11	-0.644838	0.979388	0.0335843	na	0.233283	2.25536e-05	-1.08436	0.000402314	-0.964653	ENSRNOG00000057710	cyclin D2(Ccnd2)
Ccnd3	0.605798	-0.104736	0.6789	0.202711	0.999979	-0.0399789	0.0373236	-0.465054	0.126437	-0.373935	ENSRNOG00000050258	cyclin D3(Ccnd3)
Ccndbp1	0.0204079	0.281676	0.992795	0.00717611	0.999979	0.104099	0.0684216	0.217622	0.418753	0.113947	ENSRNOG00000011379	cyclin D1 binding protein 1(Ccndbp1)
Ccne1	0.139829	-0.566195	0.377195	-0.542206	na	-0.382101	1.33728e-10	-2.26143	6.83132e-07	-1.82804	ENSRNOG00000014786	cyclin E1(Ccne1)
Ccne2	0.153624	-0.426267	0.441473	-0.44384	na	-0.550598	5.9028e-05	-1.23592	0.00476356	-0.939446	ENSRNOG00000008055	cyclin E2(Ccne2)
Ccnf	0.868396	-0.11541	0.0832458	-1.00135	0.999979	-0.314868	0.011896	-1.07947	0.0723812	-0.836224	ENSRNOG00000007483	cyclin F(Ccnf)
Ccng1	6.28791e-05	-0.313471	0.0511396	-0.329706	0.999979	-0.149527	0.0589543	0.25749	0.00590697	0.37636	ENSRNOG00000003256	cyclin G1(Ccng1)
Ccng2	2.26785e-06	0.679577	0.909798	0.0840711	0.999979	-0.0296261	0.115453	0.376563	0.135926	0.377845	ENSRNOG00000002089	cyclin G2(Ccng2)
Ccnh	9.22877e-06	-0.440091	0.406628	-0.219959	0.999979	-0.14251	0.0756845	-0.279965	0.489722	-0.130242	ENSRNOG00000031656	cyclin H(Ccnh)
Ccni	0.584401	-0.103015	0.785931	-0.0909038	0.999979	-0.0239318	0.947458	-0.0117243	0.964496	0.0092611	ENSRNOG00000002125	cyclin I(Ccni)
Ccnj	0.982208	-0.0414781	0.0894133	0.978485	0.999979	0.310443	0.193313	0.606446	0.772807	0.175246	ENSRNOG00000014551	cyclin J(NEWGENE_1306399)
Ccnjl	0.548191	-0.296834	0.976264	0.0466137	0.931882	-0.330081	0.0175999	-0.801277	0.189903	-0.49546	ENSRNOG00000003893	cyclin J-like(Ccnjl)
Ccnk	0.366297	-0.212169	0.978967	0.0330066	0.999979	0.100487	0.588574	0.170932	0.703551	0.131778	ENSRNOG00000006985	cyclin K(Ccnk)
Ccnq	0.603973	-0.0881543	0.805139	-0.0734424	0.999979	-0.0323463	0.00400982	-0.325122	0.0136688	-0.298692	ENSRNOG00000022582	family with sequence similarity 58, member B(Fam58b)
Ccnt1	0.374878	0.361767	0.828779	0.179663	0.999979	0.153548	0.19338	0.430058	0.486104	0.266898	ENSRNOG00000053054	cyclin T1(Ccnt1)
Ccnt2	0.00328281	0.381697	0.71358	0.131909	0.999979	0.0777791	0.00106875	0.489191	0.0106865	0.411807	ENSRNOG00000017113	cyclin T2(Ccnt2)
Ccny	0.383378	0.199247	0.841071	0.110565	0.999979	-0.074632	0.892899	0.0370575	0.59236	0.137986	ENSRNOG00000018123	cyclin Y(Ccny)
Ccnyl1	0.769824	-0.123784	0.930799	-0.0754496	0.999979	-0.188402	0.316867	-0.276874	0.821821	-0.0784588	ENSRNOG00000023807	cyclin Y-like 1(Ccnyl1)
Ccp110	0.99764	0.000661389	0.722861	-0.0884542	0.999979	0.0236393	0.693828	-0.0532101	0.597869	-0.0721688	ENSRNOG00000027405	centriolar coiled-coil protein 110(Ccp110)
Ccpg1	3.03257e-27	0.892678	0.544835	-0.198365	0.999979	0.0649343	0.206452	0.225905	0.296212	0.201925	ENSRNOG00000053428	cell cycle progression 1(Ccpg1)
Ccpg1os	0.935855	0.0460551	0.961657	-0.0731589	0.999979	0.0583744	0.790022	-0.129187	0.677113	-0.20449	ENSRNOG00000052869	cell cycle progression 1, opposite strand(Ccpg1os)
Ccr4	2.31112e-07	-1.04781	1.33527e-07	-1.57466	4.6728e-09	-2.01731	1.18813e-08	-1.59672	0.314458	0.337617	ENSRNOG00000010315	C-C motif chemokine receptor 4(Ccr4)
Ccr6	0.387263	0.371755	0.00849795	-1.9506	0.99021	-0.752438	0.0451433	-1.27473	0.506748	-0.508882	ENSRNOG00000012964	C-C motif chemokine receptor 6(Ccr6)
Ccr7	1.18179e-13	0.585915	0.611875	0.169578	0.999979	0.122283	0.211858	0.21597	0.717356	0.0778463	ENSRNOG00000010665	C-C motif chemokine receptor 7(Ccr7)
Ccr8	2.27012e-15	-1.62049	0.000634831	-1.99226	0.886781	-1.34836	1.19178e-09	-3.15281	2.71553e-05	-2.29121	ENSRNOG00000026759	C-C motif chemokine receptor 8(Ccr8)
Ccr9	0.169493	-0.373661	0.619642	-0.633721	0.999979	-0.450158	0.0524261	-1.20316	0.207007	-0.869675	ENSRNOG00000006311	C-C motif chemokine receptor 9(Ccr9)
Ccrl2	0.306231	-0.592876	0.557242	0.550287	0.00552947	2.29169	0.0179619	1.0899	0.00938377	-1.38879	ENSRNOG00000033234	C-C motif chemokine receptor like 2(Ccrl2)
Ccs	0.38785	-0.122378	0.898921	-0.0407559	0.999979	-0.00874128	0.0012444	-0.317018	0.00327014	-0.306844	ENSRNOG00000047816	copper chaperone for superoxide dismutase(Ccs)
Ccsap	0.0330742	1.11398	0.977337	0.0594942	0.999979	-0.466941	0.576813	-0.294286	0.984876	-0.0137973	ENSRNOG00000017690	centriole, cilia and spindle-associated protein(Ccsap)
Ccser2	9.88535e-07	0.607144	0.874414	0.0911058	0.999979	-0.0747579	0.149906	0.299669	0.0868679	0.364525	ENSRNOG00000022781	coiled-coil serine-rich protein 2(Ccser2)
Cct2	8.00315e-08	-0.509291	0.981117	-0.0185921	0.999979	-0.0336165	0.0354561	-0.34912	0.0645117	-0.327566	ENSRNOG00000021317	chaperonin containing TCP1 subunit 2(Cct2)
Cct3	2.48667e-07	-0.37118	0.591226	-0.127379	0.999979	-0.0816109	3.37953e-07	-0.543629	0.000103314	-0.44482	ENSRNOG00000019090	chaperonin containing TCP1 subunit 3(Cct3)
Cct4	0.000957081	-0.278699	0.850474	-0.0602572	0.999979	0.0893346	0.0400764	-0.240121	0.00223601	-0.357954	ENSRNOG00000009642	chaperonin containing TCP1 subunit 4(Cct4)
Cct5	1.72497e-07	-0.409752	0.830338	-0.0780468	0.999979	0.00890221	0.00119244	-0.426718	0.00145181	-0.439752	ENSRNOG00000011632	chaperonin containing TCP1 subunit 5(Cct5)
Cct6a	6.0916e-07	-0.435542	0.984401	-0.0162093	0.999979	0.114743	0.0109156	-0.388774	0.00155783	-0.494133	ENSRNOG00000000923	chaperonin containing TCP1 subunit 6A(Cct6a)
Cct6b	0.143598	0.822437	0.815639	0.207097	0.935343	0.37865	0.171401	0.485623	0.849972	0.0927147	ENSRNOG00000007523	chaperonin containing TCP1 subunit 6B(Cct6b)
Cct7	4.54292e-11	-0.452819	0.613029	-0.140729	0.999979	-0.0255156	9.83069e-06	-0.548669	7.87637e-05	-0.518721	ENSRNOG00000015630	chaperonin containing TCP1 subunit 7(Cct7)
Cct8	5.87013e-11	-0.45678	0.250104	-0.235096	0.999979	-0.0750258	1.80389e-06	-0.584975	8.27174e-05	-0.513984	ENSRNOG00000001592	chaperonin containing TCP1 subunit 8(Cct8)
Ccz1b	0.525474	0.0773621	0.680706	-0.108943	0.970276	-0.164454	0.273768	-0.143591	0.901808	0.0211642	ENSRNOG00000001032	CCZ1 homolog B, vacuolar protein trafficking and biogenesis associated(Ccz1b)
Cd101	4.99845e-11	1.19405	0.335778	-0.460318	0.999979	-0.045223	0.736218	-0.125193	0.94756	-0.0283054	ENSRNOG00000037190	CD101 molecule(Cd101)
Cd151	0.0663026	0.347666	0.955077	-0.0759546	0.999979	0.140884	0.561906	-0.24261	0.245465	-0.463902	ENSRNOG00000046094	CD151 molecule (Raph blood group)(Cd151)
Cd160	0.8247	0.191642	0.932763	0.132879	0.999979	-0.36342	0.930613	0.0518954	0.488387	0.370903	ENSRNOG00000000097	CD160 molecule(Cd160)
Cd164	2.20132e-11	0.511756	0.939775	0.0237685	0.851598	0.236663	0.024709	0.198166	0.833931	-0.0262718	ENSRNOG00000000304	CD164 molecule(Cd164)
Cd164l2	0.347468	-0.259152	0.664011	-0.2095	0.773635	-0.403669	0.00736187	-0.583422	0.542402	-0.167551	ENSRNOG00000009505	CD164 molecule like 2(Cd164l2)
Cd19	na	1.12699	1	0.000132071	0.999979	-0.493554	0.317498	-0.961147	0.901808	-0.145968	ENSRNOG00000018311	CD19 molecule(Cd19)
Cd1d1	0.11728	0.27015	0.274971	-0.241244	0.999979	-0.0254024	0.838122	-0.0380283	0.986014	0.00391636	ENSRNOG00000016451	CD1d1 molecule(Cd1d1)
Cd2	0.0193307	0.193111	0.901601	0.0403384	0.999979	0.042174	0.206351	0.139926	0.343807	0.115018	ENSRNOG00000015821	Cd2 molecule(Cd2)
Cd200	0.000102736	0.447113	0.930799	0.166728	0.999979	0.280322	0.221438	-0.726254	0.206141	-0.78778	ENSRNOG00000002141	Cd200 molecule(Cd200)
Cd200r1	0.0380091	0.365095	0.117122	-0.511265	0.776122	-0.377827	0.0013265	-0.736523	0.197222	-0.347014	ENSRNOG00000039048	CD200 receptor 1(Cd200r1)
Cd22	0.281354	0.187212	0.973246	-0.0361095	0.999979	-0.122535	0.000332807	-0.788474	0.00947698	-0.617175	ENSRNOG00000024000	CD22 molecule(Cd22)
Cd226	4.61386e-09	-0.621346	0.00338964	-0.638401	0.999979	-0.0254573	0.000303419	-0.67585	0.00108847	-0.646701	ENSRNOG00000038197	CD226 molecule(Cd226)
Cd244	0.905272	-0.0472209	0.161061	-0.672189	0.999979	-0.0511474	0.041036	-0.688328	0.0686385	-0.654486	ENSRNOG00000004698	CD244 molecule(Cd244)
Cd247	0.0017957	0.280281	0.00384242	0.240053	0.445693	0.30171	1.05188e-12	0.47633	0.0402786	0.163057	ENSRNOG00000003298	Cd247 molecule(Cd247)
Cd27	0.00222889	0.246486	0.000430943	0.45042	0.842176	0.288651	3.95267e-05	0.469352	0.17385	0.18664	ENSRNOG00000027466	CD27 molecule(Cd27)
Cd274	0.981714	-0.00397045	1.43213e-26	1.24942	9.52715e-14	1.35005	1.33325e-72	2.04033	2.96742e-08	0.702534	ENSRNOG00000016112	CD274 molecule(Cd274)
Cd28	0.201236	0.14166	0.657889	0.155668	0.786616	0.245875	0.0231	0.366711	0.591041	0.11121	ENSRNOG00000010283	Cd28 molecule(Cd28)
Cd2ap	3.39758e-07	0.558842	0.359441	-0.168034	0.999979	-0.0152562	0.549841	0.0775929	0.494704	0.0914324	ENSRNOG00000011987	CD2-associated protein(Cd2ap)
Cd2bp2	0.214663	0.136835	0.692862	0.113156	0.999979	0.0848779	0.769904	0.0488603	0.9106	-0.0207498	ENSRNOG00000017201	Cd2 (cytoplasmic tail) binding protein 2(Cd2bp2)
Cd320	0.327783	-0.139555	0.968391	0.0158733	0.997128	-0.100162	0.544253	-0.0658697	0.780842	0.0350753	ENSRNOG00000006901	CD320 molecule(Cd320)
Cd37	1.13834e-11	0.62188	0.808775	0.103107	0.999979	0.0598026	0.392457	0.160842	0.577707	0.116805	ENSRNOG00000020699	CD37 molecule(Cd37)
Cd38	1.17276e-21	1.05564	0.630617	0.252329	0.999979	0.139403	0.00291073	-0.710261	0.000379576	-0.871529	ENSRNOG00000003069	CD38 molecule(Cd38)
Cd3d	0.000281632	0.297474	0.788579	-0.0947515	0.999979	-0.0749535	0.17379	0.204216	0.0516305	0.292591	ENSRNOG00000015994	CD3d molecule(Cd3d)
Cd3e	0.0084398	0.231932	0.642618	0.0812419	0.999979	0.0367377	0.0772825	0.149127	0.227918	0.112858	ENSRNOG00000016069	CD3e molecule(Cd3e)
Cd3eap	0.186868	-0.167709	0.546269	-0.148168	0.630414	-0.35265	3.08011e-07	-0.589222	0.100399	-0.223546	ENSRNOG00000016825	CD3e molecule associated protein(Cd3eap)
Cd3g	3.34846e-09	0.518743	0.793834	-0.102005	0.988424	-0.240837	0.0240385	0.347327	8.84897e-05	0.595164	ENSRNOG00000015945	CD3g molecule(Cd3g)
Cd4	0.000630371	0.263203	0.875177	0.0650303	0.999979	0.198088	0.123295	-0.228805	0.0108863	-0.372521	ENSRNOG00000016294	Cd4 molecule(Cd4)
Cd40	0.8792	-0.128872	0.000525213	1.76312	0.0374133	1.77919	0.00771933	1.27088	0.58098	-0.3681	ENSRNOG00000018488	CD40 molecule(Cd40)
Cd40lg	7.75216e-13	0.761848	0.657267	-0.096054	0.999979	-0.231519	0.307446	0.112831	0.000483726	0.344761	ENSRNOG00000000871	CD40 ligand(Cd40lg)
Cd44	1.62131e-16	0.792872	0.556104	-0.175141	0.999979	-0.180434	0.226058	-0.196009	0.892098	0.0290751	ENSRNOG00000006094	CD44 molecule (Indian blood group)(Cd44)
Cd46	0.281589	0.889998	0.927976	0.157086	0.999979	0.261248	0.229034	0.632858	0.62896	0.310421	ENSRNOG00000007917	CD46 molecule(Cd46)
Cd47	0.00207535	0.242044	0.355479	-0.153437	0.999979	0.11226	3.35001e-07	0.463928	0.000195082	0.365426	ENSRNOG00000001964	Cd47 molecule(Cd47)
Cd48	0.487011	0.0707618	0.200225	-0.22347	0.999979	0.0185946	0.364431	0.120995	0.43779	0.111375	ENSRNOG00000004737	Cd48 molecule(Cd48)
Cd5	0.475878	-0.109148	0.13228	-0.36474	0.997128	-0.238923	0.265527	-0.213132	0.821011	0.0557856	ENSRNOG00000020872	Cd5 molecule(Cd5)
Cd52	0.31685	-0.627982	0.877321	0.214194	0.888514	0.636659	0.547587	-0.347055	0.062773	-1.03076	ENSRNOG00000015403	CD52 molecule(Cd52)
Cd53	2.41892e-20	0.681929	0.407518	0.136535	0.628037	0.293887	1.98106e-11	0.571856	0.00390058	0.279271	ENSRNOG00000017874	Cd53 molecule(Cd53)
Cd59	0.0160533	1.74262	0.273672	-1.22492	0.999979	-0.152168	0.223633	-0.919451	0.177615	-1.07411	ENSRNOG00000042821	CD59 molecule(Cd59)
Cd6	0.669457	0.0450266	0.862057	-0.063486	0.999979	-0.160169	0.471044	-0.107166	0.589502	0.0879787	ENSRNOG00000020884	Cd6 molecule(Cd6)
Cd63	0.667268	0.226058	0.798243	-0.303464	0.384128	-1.16882	0.0135983	-1.16672	0.997858	-0.00171661	ENSRNOG00000007650	Cd63 molecule(Cd63)
Cd69	1.45657e-12	-0.570627	0.343407	0.221031	0.999979	0.260429	2.1995e-28	1.35822	1.01484e-18	1.14322	ENSRNOG00000056783	Cd69 molecule(Cd69)
Cd7	0.0258394	0.344921	0.800992	0.18038	0.999979	-0.156115	1.00751e-05	-1.16879	0.000121906	-1.0787	ENSRNOG00000036674	Cd7 molecule(Cd7)
Cd70	na	0.524757	0.992795	-0.0466201	0.999979	0.334059	0.793918	-0.296393	0.72434	-0.411178	ENSRNOG00000051015	Cd70 molecule(Cd70)
Cd72	0.0210757	-1.57597	0.195614	-1.51401	0.562681	-2.06235	0.00556121	-2.25791	0.238671	-1.03782	ENSRNOG00000017485	Cd72 molecule(Cd72)
Cd74	2.35489e-08	-0.542526	4.88944e-06	1.1215	0.0182087	0.943862	0.000313865	0.852854	0.902579	-0.0441065	ENSRNOG00000018735	CD74 molecule(Cd74)
Cd79a	0.282988	-0.54623	0.129401	-0.946218	0.296863	-0.906192	0.000944007	-1.46713	0.336363	-0.491382	ENSRNOG00000020125	CD79a molecule(Cd79a)
Cd80	0.0263934	0.951321	0.611238	-0.32791	0.999979	-0.03236	0.66425	-0.164949	0.711544	-0.151903	ENSRNOG00000001527	Cd80 molecule(Cd80)
Cd81	0.948495	0.00917979	0.909744	0.0455927	0.999979	-0.0479754	0.803498	0.0410578	0.541994	0.0950557	ENSRNOG00000020451	Cd81 molecule(Cd81)
Cd82	1.65942e-05	-0.291195	0.0504331	-0.458736	0.699222	-0.435721	7.66151e-10	-1.033	0.00151544	-0.593043	ENSRNOG00000000047	Cd82 molecule(Cd82)
Cd83	1.53061e-17	-0.804785	1.40208e-10	-1.30576	0.229678	-0.999176	2.91461e-12	-1.37243	0.0744969	-0.421328	ENSRNOG00000018092	CD83 molecule(Cd83)
Cd84	0.182161	0.380699	0.0131668	-0.697663	0.90272	-0.286796	0.00456328	-0.660976	0.178939	-0.358875	ENSRNOG00000022884	CD84 molecule(Cd84)
Cd86	0.790301	0.150435	0.263495	-1.14143	0.0330483	-2.15568	0.029888	-1.44683	0.243629	0.859901	ENSRNOG00000038835	CD86 molecule(Cd86)
Cd8a	2.11288e-05	0.991168	0.943646	-0.0754377	0.790827	-0.837294	0.0022374	-0.884302	0.557506	-0.219388	ENSRNOG00000007178	CD8a molecule(Cd8a)
Cd8b	na	0.707064	0.530237	0.670052	0.999979	0.0188234	0.302449	0.625287	0.550431	0.415924	ENSRNOG00000007129	CD8b molecule(Cd8b)
Cd9	0.00328342	0.572648	0.438458	-0.329684	0.999979	-0.150322	0.329907	0.256145	0.091064	0.430547	ENSRNOG00000019556	CD9 molecule(Cd9)
Cd96	0.0216687	-0.28727	0.0906983	-0.399019	0.999979	-0.0105588	0.0492475	-0.353375	0.0828793	-0.332128	ENSRNOG00000023030	CD96 molecule(Cd96)
Cd99	0.807609	-0.0758905	0.23503	0.263947	0.999979	0.0950868	0.940329	-0.0147937	0.546002	-0.112193	ENSRNOG00000050735	CD99 molecule(Cd99)
Cd99l2	0.00123652	0.674594	0.840454	-0.129341	0.999979	0.084431	0.00582143	-0.63961	0.0100352	-0.631026	ENSRNOG00000023841	CD99 molecule-like 2(Cd99l2)
Cdadc1	0.602055	0.0985171	0.971629	0.022687	0.999979	0.15683	0.256774	0.171888	0.882574	0.0292867	ENSRNOG00000012209	cytidine and dCMP deaminase domain containing 1(Cdadc1)
Cdan1	0.612979	0.275558	0.758756	0.27166	0.912772	-0.559952	0.484235	-0.306399	0.527481	0.288684	ENSRNOG00000047427	codanin 1(Cdan1)
Cdc123	0.00783295	-0.237853	0.463788	-0.153607	0.999979	-0.0234252	0.235658	-0.14796	0.454749	-0.105077	ENSRNOG00000017770	cell division cycle 123(Cdc123)
Cdc14a	2.57786e-07	-0.58564	0.0611371	-0.472459	0.999979	-0.218809	0.0303187	-0.427331	0.329247	-0.225361	ENSRNOG00000014515	cell division cycle 14A(Cdc14a)
Cdc14b	0.083338	0.494476	0.281639	-0.450307	0.962908	-0.315587	0.00414399	-0.743681	0.181645	-0.397779	ENSRNOG00000018999	cell division cycle 14B(Cdc14b)
Cdc16	0.46812	-0.0865695	0.4206	-0.166835	0.999979	-0.0296112	0.00263636	-0.343426	0.0162533	-0.296317	ENSRNOG00000017536	cell division cycle 16(Cdc16)
Cdc20	0.000786467	-0.600775	0.90874	-0.150644	0.999979	0.0981376	0.0418133	-0.843676	0.0162753	-1.02984	ENSRNOG00000028415	cell division cycle 20(Cdc20)
Cdc23	0.501111	0.107303	0.212832	-0.193463	0.999979	-0.0681858	0.0248567	-0.232305	0.194813	-0.151929	ENSRNOG00000024241	cell division cycle 23(Cdc23)
Cdc25a	0.0982262	-0.328537	0.980924	0.0248997	0.999979	-0.0515094	0.000772225	-0.710774	0.0119131	-0.575687	ENSRNOG00000020737	cell division cycle 25A(Cdc25a)
Cdc25b	1.89763e-33	1.70881	0.147454	0.435469	0.999979	0.0665501	0.014258	0.515664	0.0500777	0.44544	ENSRNOG00000021248	cell division cycle 25B(Cdc25b)
Cdc25c	0.701641	0.110268	0.831689	0.0762522	0.999979	-0.0398035	0.701069	-0.0656103	0.883383	-0.0280847	ENSRNOG00000024008	cell division cycle 25C(Cdc25c)
Cdc26	0.518191	0.0774869	0.961657	-0.0172243	0.999979	0.110615	0.775807	-0.0322664	0.14981	-0.139342	ENSRNOG00000029785	cell division cycle 26(Cdc26)
Cdc27	0.756647	0.0686254	0.91394	0.0418835	0.935343	0.191372	0.0797112	0.212667	0.929978	0.0150843	ENSRNOG00000005904	cell division cycle 27(Cdc27)
Cdc34	0.321794	-0.304545	0.737051	0.159063	0.999979	-0.100341	0.505907	0.156713	0.279835	0.250893	ENSRNOG00000060530	cell division cycle 34(Cdc34)
Cdc37	0.00546454	-0.293281	0.988046	-0.0122711	0.999979	-0.0349853	0.369878	-0.129842	0.599191	-0.0858928	ENSRNOG00000033426	cell division cycle 37(Cdc37)
Cdc37l1	0.769964	-0.0557321	0.992795	0.00657144	0.999979	0.0173036	0.174462	0.168662	0.255121	0.153541	ENSRNOG00000010967	cell division cycle 37-like 1(Cdc37l1)
Cdc40	0.774658	0.039553	0.922166	-0.0608123	0.806478	0.32814	0.93115	0.0213738	0.0720178	-0.35924	ENSRNOG00000000581	cell division cycle 40(Cdc40)
Cdc42	0.992761	0.00119458	0.732401	-0.0697906	0.994816	0.149233	0.0113298	-0.218248	8.96627e-06	-0.37759	ENSRNOG00000013536	cell division cycle 42(Cdc42)
Cdc42bpg	0.792902	0.180874	0.603514	0.398053	0.999979	0.357699	0.513885	0.283774	0.826155	-0.116826	ENSRNOG00000027456	CDC42 binding protein kinase gamma(Cdc42bpg)
Cdc42ep3	0.0244032	0.723059	0.395856	-0.616757	0.459411	-0.702719	0.0502081	-0.840861	0.819716	-0.133945	ENSRNOG00000032136	CDC42 effector protein 3(Cdc42ep3)
Cdc42ep4	0.782955	-0.212224	0.59885	-0.951258	0.853504	-1.30852	0.23441	-1.12895	0.699426	-0.438295	ENSRNOG00000028946	CDC42 effector protein 4(Cdc42ep4)
Cdc42ep5	na	na	0.749216	0.449241	0.999979	-0.253547	0.99491	-0.00531509	0.642323	0.356339	ENSRNOG00000018616	CDC42 effector protein 5(Cdc42ep5)
Cdc42se1	4.97233e-20	0.754008	0.348353	0.137643	0.999979	-0.0903441	5.30232e-05	0.33436	4.17281e-07	0.428463	ENSRNOG00000060538	CDC42 small effector 1(Cdc42se1)
Cdc42se2	5.49064e-18	0.636082	0.844389	-0.0615492	0.999979	0.193587	5.39244e-05	0.433337	0.0369912	0.25292	ENSRNOG00000042449	CDC42 small effector 2(Cdc42se2)
Cdc45	0.0131012	-0.557527	0.740521	-0.253552	na	0.000739522	1.36421e-06	-1.47648	6.47716e-06	-1.45275	ENSRNOG00000050071	cell division cycle 45(Cdc45)
Cdc5l	0.861054	0.0227799	0.999876	-0.000100579	0.999979	0.130022	0.604947	0.0607653	0.613156	-0.062214	ENSRNOG00000019975	cell division cycle 5-like(Cdc5l)
Cdc6	0.000389224	-0.696625	0.244319	-0.940393	na	-0.20773	6.56005e-11	-3.19211	5.68183e-08	-2.78752	ENSRNOG00000027787	cell division cycle 6(Cdc6)
Cdc7	0.00161522	-0.572405	0.988984	0.01844	0.999979	0.123187	0.0815186	-0.365062	0.0133854	-0.526428	ENSRNOG00000002105	cell division cycle 7(Cdc7)
Cdc73	0.244237	0.283702	0.927651	-0.0604297	0.999979	0.087042	0.953079	-0.0150422	0.836048	-0.0563575	ENSRNOG00000003258	cell division cycle 73(Cdc73)
Cdca2	0.334958	-0.552778	0.520661	-0.714963	0.999979	-0.721667	0.00169515	-1.83881	0.00763732	-1.66194	ENSRNOG00000025302	cell division cycle associated 2(Cdca2)
Cdca3	0.470693	-0.422996	0.819622	-0.2691	0.999979	-0.219994	1.97252e-07	-2.49335	1.47717e-05	-2.18051	ENSRNOG00000015529	cell division cycle associated 3(Cdca3)
Cdca4	0.0508855	-0.267313	0.908175	-0.0636618	0.999979	0.107502	0.156302	-0.258402	0.0250441	-0.404981	ENSRNOG00000013898	cell division cycle associated 4(Cdca4)
Cdca5	0.0659645	-0.62813	0.702391	-0.378353	0.999979	0.189372	0.000749299	-1.45674	0.000228733	-1.67944	ENSRNOG00000046635	cell division cycle associated 5(Cdca5)
Cdca7	1.1264e-14	-0.885443	0.186547	-0.395698	na	-0.439283	5.0916e-22	-1.76543	1.65182e-09	-1.17954	ENSRNOG00000001514	cell division cycle associated 7(Cdca7)
Cdca7l	0.0600712	0.193714	0.75051	0.0989454	0.971867	0.153217	7.5876e-06	-0.543848	1.71779e-08	-0.702978	ENSRNOG00000005410	cell division cycle associated 7 like(Cdca7l)
Cdca8	0.000867909	-0.461301	0.798243	-0.22609	0.999979	0.045448	0.0233477	-0.790169	0.0105174	-0.925755	ENSRNOG00000031431	cell division cycle associated 8(Cdca8)
Cdh15	0.86612	-0.0936344	0.758756	0.202648	0.999979	-0.247111	1.86113e-05	-1.21278	0.00136828	-0.964737	ENSRNOG00000027954	cadherin 15(Cdh15)
Cdhr1	na	na	0.930799	0.267046	0.999979	0.827797	0.666097	-0.479895	0.232	-1.26976	ENSRNOG00000013330	cadherin-related family member 1(Cdhr1)
Cdhr2	na	na	0.871129	0.381161	0.999979	0.644543	0.980057	0.0282887	0.637275	-0.521133	ENSRNOG00000017917	cadherin-related family member 2(Cdhr2)
Cdip1	0.0964387	0.251568	0.741587	0.130856	0.999979	-0.107313	0.669895	0.0890963	0.367856	0.179234	ENSRNOG00000003328	cell death-inducing p53 target 1(Cdip1)
Cdipt	0.764592	0.036889	0.98919	-0.00685583	0.999979	-0.0335031	0.692487	0.0418517	0.394502	0.0853484	ENSRNOG00000024144	CDP-diacylglycerol--inositol 3-phosphatidyltransferase(Cdipt)
Cdk1	9.51556e-05	-1.08408	0.244051	-0.657468	0.999979	-0.620044	1.53361e-17	-3.26641	2.86998e-11	-2.58893	ENSRNOG00000000632	cyclin-dependent kinase 1(Cdk1)
Cdk10	0.923845	0.0182552	0.635886	0.0942928	0.516029	-0.204822	0.00145482	-0.286132	0.486792	-0.0797582	ENSRNOG00000016088	cyclin-dependent kinase 10(Cdk10)
Cdk11b	0.00476882	0.316604	0.402295	0.208501	0.999979	0.0450295	0.163929	-0.2139	0.0981713	-0.26068	ENSRNOG00000017213	cyclin-dependent kinase 11B(Cdk11b)
Cdk12	0.111864	0.274471	0.103875	0.373203	0.999979	0.096471	0.000163529	0.60166	0.00309857	0.508111	ENSRNOG00000006000	cyclin-dependent kinase 12(Cdk12)
Cdk13	0.431507	0.152893	0.803669	0.0858858	0.999979	0.119415	0.00549325	0.36175	0.0895949	0.247078	ENSRNOG00000013620	cyclin-dependent kinase 13(Cdk13)
Cdk16	0.115584	0.264645	0.536194	0.248366	0.999979	-0.212398	0.853385	0.0507281	0.19713	0.298763	ENSRNOG00000008578	cyclin-dependent kinase 16(Cdk16)
Cdk17	0.0349768	0.397745	0.116156	-0.466754	0.536293	-0.454075	0.0627122	0.406071	3.41467e-05	0.861688	ENSRNOG00000004148	cyclin-dependent kinase 17(Cdk17)
Cdk19	1.05966e-10	0.649113	0.389666	0.215947	0.999979	0.247155	0.283489	0.172576	0.637909	-0.0895974	ENSRNOG00000000583	cyclin-dependent kinase 19(Cdk19)
Cdk2	0.981093	0.00344957	0.644811	-0.133587	0.999979	-0.0799495	5.48111e-07	-0.623336	3.2559e-05	-0.551248	ENSRNOG00000006469	cyclin dependent kinase 2(Cdk2)
Cdk20	0.245612	-0.161204	0.155159	-0.293019	0.999979	-0.148337	0.00498793	-0.396268	0.0987606	-0.260723	ENSRNOG00000017991	cyclin-dependent kinase 20(Cdk20)
Cdk2ap1	0.00427638	-0.77272	0.622448	-0.339496	0.710383	-0.641157	0.035047	-0.695652	0.787797	-0.122159	ENSRNOG00000001070	cyclin-dependent kinase 2 associated protein 1(Cdk2ap1)
Cdk2ap2	0.000695202	-0.327679	0.803624	0.0479309	0.999979	0.171133	0.336864	0.0806329	0.297942	-0.0915023	ENSRNOG00000018391	cyclin-dependent kinase 2 associated protein 2(Cdk2ap2)
Cdk4	5.37505e-05	-0.468246	0.638423	-0.175013	0.999979	-0.270841	3.19554e-07	-0.816492	0.00399938	-0.509257	ENSRNOG00000025602	cyclin-dependent kinase 4(Cdk4)
Cdk5	0.909617	0.0208977	0.557338	0.11422	0.999979	-0.0126802	0.201919	-0.134604	0.282066	-0.123053	ENSRNOG00000008017	cyclin-dependent kinase 5(Cdk5)
Cdk5r1	0.200385	-0.40306	0.600031	0.343633	0.999979	0.320056	0.327988	-0.352619	0.0712115	-0.635949	ENSRNOG00000021685	cyclin-dependent kinase 5 regulatory subunit 1(Cdk5r1)
Cdk5rap1	0.609664	0.0922133	0.0832458	-0.290748	0.999979	-0.127043	2.25733e-05	-0.503663	0.002609	-0.388694	ENSRNOG00000015696	CDK5 regulatory subunit associated protein 1(Cdk5rap1)
Cdk5rap2	0.500709	0.123447	0.897443	0.0457921	0.999979	0.030929	0.775807	-0.04216	0.587894	-0.0785028	ENSRNOG00000005788	CDK5 regulatory subunit associated protein 2(Cdk5rap2)
Cdk5rap3	0.324097	0.106572	0.539117	0.120775	0.999979	-0.0721093	0.316023	0.112227	0.10234	0.179006	ENSRNOG00000048747	CDK5 regulatory subunit associated protein 3(Cdk5rap3)
Cdk6	0.165623	-0.616025	0.853596	-0.234582	0.999979	-0.652495	0.0162379	-1.12241	0.568133	-0.330536	ENSRNOG00000009258	cyclin-dependent kinase 6(Cdk6)
Cdk7	0.997444	0.000687884	0.869207	0.0396636	0.999979	0.0354163	0.0357797	0.172905	0.128147	0.138487	ENSRNOG00000018510	cyclin-dependent kinase 7(Cdk7)
Cdk9	0.111533	-0.301467	0.86521	-0.0945197	0.322806	-0.522652	0.190848	-0.271381	0.262679	0.247776	ENSRNOG00000022586	cyclin-dependent kinase 9(Cdk9)
Cdkal1	0.254528	-0.192459	0.46603	-0.167447	0.999979	0.128601	0.0309232	-0.271185	0.00249084	-0.388381	ENSRNOG00000018381	CDK5 regulatory subunit associated protein 1-like 1(Cdkal1)
Cdkl3	0.823481	0.128518	0.922848	-0.214093	0.999979	-0.455904	0.708665	-0.312242	0.925989	0.0877729	ENSRNOG00000059485	cyclin-dependent kinase-like 3(Cdkl3)
Cdkl3	0.0989399	0.490335	0.132531	-0.642785	0.999979	0.0430414	0.612671	0.18447	0.806035	0.102436	ENSRNOG00000054806	cyclin-dependent kinase-like 3(LOC108348323)
Cdkn1a	0.934945	0.0680345	0.991773	-0.0377219	0.999979	-0.499593	0.151805	0.853977	0.00904831	1.49866	ENSRNOG00000000521	cyclin-dependent kinase inhibitor 1A(Cdkn1a)
Cdkn1b	1.43797e-12	1.10731	0.284812	0.341385	0.999979	0.182896	0.000426665	0.673513	0.0189265	0.493301	ENSRNOG00000007249	cyclin-dependent kinase inhibitor 1B(Cdkn1b)
Cdkn1c	0.608261	0.471975	0.743414	0.465432	0.938425	-0.786357	0.665012	-0.335994	0.592326	0.410175	ENSRNOG00000059500	cyclin-dependent kinase inhibitor 1C(Cdkn1c)
Cdkn2aip	1.4132e-06	0.528895	0.507196	0.13734	0.999979	0.190764	7.98223e-08	0.530377	0.000777981	0.364894	ENSRNOG00000022736	CDKN2A interacting protein(Cdkn2aip)
Cdkn2aipnl	0.504826	0.082586	2.1424e-07	-0.357608	0.352545	-0.287763	1.10659e-05	-0.291748	0.962151	-0.00522499	ENSRNOG00000005024	CDKN2A interacting protein N-terminal like(Cdkn2aipnl)
Cdkn2c	0.717713	0.184654	0.172997	-0.667873	0.999979	0.0788131	0.113391	-0.549305	0.0569398	-0.688615	ENSRNOG00000008956	cyclin-dependent kinase inhibitor 2C(Cdkn2c)
Cdkn3	0.952922	-0.0331515	0.456524	-0.400424	0.999979	-0.296024	0.00247368	-0.884376	0.230779	-0.407177	ENSRNOG00000009785	cyclin-dependent kinase inhibitor 3(Cdkn3)
Cdo1	0.535375	0.50386	0.828779	0.275639	0.999979	0.0137538	0.858372	0.114289	0.823087	0.151112	ENSRNOG00000000158	cysteine dioxygenase type 1(Cdo1)
Cdon	na	na	0.973141	0.131451	0.999979	-0.0969516	0.699208	-0.413261	0.810519	-0.283185	ENSRNOG00000011789	cell adhesion associated, oncogene regulated(Cdon)
Cdpf1	0.886314	-0.0286644	0.312551	-0.165225	0.999979	-0.079841	0.148186	-0.153244	0.579755	-0.0706618	ENSRNOG00000032846	cysteine rich, DPF motif domain containing 1(Cdpf1)
Cdr2	0.956325	0.0508047	0.903652	-0.184105	0.996137	-0.511225	0.96665	-0.027017	0.33867	0.524865	ENSRNOG00000017260	cerebellar degeneration-related protein 2(Cdr2)
Cds2	0.915934	0.0521309	0.505727	0.324612	0.999979	0.413362	0.000784034	0.803071	0.159975	0.400937	ENSRNOG00000021265	CDP-diacylglycerol synthase 2(Cds2)
Cdt1	0.00295462	-0.691553	0.894695	-0.0935182	0.999979	-0.267859	4.52511e-08	-1.16177	0.0011761	-0.750591	ENSRNOG00000013970	chromatin licensing and DNA replication factor 1(Cdt1)
Cdv3	0.55306	0.1284	0.647989	0.143609	0.938425	0.508913	0.0333194	0.30959	0.0713389	-0.288396	ENSRNOG00000010186	carnitine deficiency-associated gene expressed in ventricle 3(Cdv3)
Cdyl	0.403157	0.275333	0.954783	-0.0651339	0.954449	-0.304705	0.789897	-0.10029	0.706273	0.143014	ENSRNOG00000032215	chromodomain Y-like(Cdyl)
Cdyl2	0.810308	0.107001	0.779967	0.174774	0.999979	-0.0313486	0.764571	0.098655	0.681385	0.137018	ENSRNOG00000042888	chromodomain Y-like 2(Cdyl2)
Ceacam1	0.935103	0.0611493	0.299196	-0.871115	0.999979	-0.141683	0.0792049	-0.944561	0.184277	-0.779386	ENSRNOG00000020578	carcinoembryonic antigen related cell adhesion molecule 1(Ceacam1)
Ceacam18	0.566301	0.438585	0.99128	-0.0286631	0.977892	-0.371056	0.96665	0.022941	0.389013	0.407382	ENSRNOG00000022701	carcinoembryonic antigen-related cell adhesion molecule 18(Ceacam18)
Cebpb	na	na	0.000305319	4.47515	0.93981	1.69053	0.0769035	2.29398	0.468481	1.16982	ENSRNOG00000057347	CCAAT/enhancer binding protein beta(Cebpb)
Cebpg	0.0574066	0.289863	0.908175	0.102018	0.999979	-0.0632906	0.361345	0.282537	0.315463	0.322701	ENSRNOG00000021144	CCAAT/enhancer binding protein gamma(Cebpg)
Cebpz	0.70206	0.0542041	0.262922	-0.161855	0.999979	0.0468921	0.169446	-0.136022	0.0656967	-0.184289	ENSRNOG00000005087	CCAAT/enhancer binding protein zeta(Cebpz)
Cebpzos	0.295964	-0.274016	0.389314	-0.282455	0.999979	0.0904435	0.878767	0.0378408	0.779764	-0.073295	ENSRNOG00000040303	uncharacterized LOC103692531(LOC103692531)
Cecr2	0.182792	0.753582	0.975016	-0.0674279	0.999979	-0.479984	0.168144	0.64711	0.0203093	1.06049	ENSRNOG00000011566	CECR2, histone acetyl-lysine reader(Cecr2)
Cel	na	na	0.731906	0.586704	0.999979	-0.11378	0.802626	0.243731	0.777831	0.28747	ENSRNOG00000010406	carboxyl ester lipase(Cel)
Celf1	0.0125089	0.260008	0.811237	0.0861249	0.999979	-0.13337	0.904096	-0.0226824	0.592896	0.0948564	ENSRNOG00000010379	CUGBP, Elav-like family member 1(Celf1)
Celf2	0.989052	0.00308836	0.945421	-0.0485352	0.999979	-0.00711947	0.763781	-0.076665	0.875318	-0.0434383	ENSRNOG00000023661	CUGBP, Elav-like family member 2(Celf2)
Celf5	na	-0.0349517	0.928485	0.177313	0.999979	-0.322038	0.959105	0.0393183	0.650626	0.333065	ENSRNOG00000004695	CUGBP, Elav-like family member 5(Celf5)
Celsr1	0.0089219	-1.1663	0.00544872	-1.992	0.566006	-1.09328	0.153711	-0.872914	0.805538	0.190638	ENSRNOG00000021285	cadherin, EGF LAG seven-pass G-type receptor 1(Celsr1)
Celsr2	0.716722	-0.245106	0.825626	0.318437	0.999979	-0.0177543	0.299841	-0.651162	0.300768	-0.688351	ENSRNOG00000020058	cadherin, EGF LAG seven-pass G-type receptor 2(Celsr2)
Cenpa	0.0355512	-0.434375	0.271282	-0.375861	0.999979	-0.0895952	3.90673e-12	-1.40959	1.39794e-09	-1.29831	ENSRNOG00000032178	centromere protein A(Cenpa)
Cenpb	0.743031	-0.171265	0.828557	0.171387	0.999979	-0.283674	0.7924	0.10254	0.232118	0.399478	ENSRNOG00000057284	centromere protein B(Cenpb)
Cenpc	0.214836	0.18389	0.993716	0.00720486	0.724084	0.301152	0.0545461	0.272404	0.919217	-0.0205054	ENSRNOG00000021776	centromere protein C(Cenpc)
Cenpe	0.141797	-0.474226	0.76651	-0.312165	0.999979	-0.116418	0.291957	-0.506181	0.527766	-0.341751	ENSRNOG00000009339	centromere protein E(Cenpe)
Cenpf	0.651068	-0.361781	0.402557	-1.01063	0.999979	0.209085	0.0316859	-1.54013	0.0119151	-1.91115	ENSRNOG00000003388	centromere protein F(Cenpf)
Cenph	0.0122231	-0.685684	0.71358	-0.330743	0.999979	-0.00706965	8.72533e-09	-2.18476	9.66918e-07	-1.95971	ENSRNOG00000018615	centromere protein H(Cenph)
Cenpi	0.323222	-0.458548	0.96864	-0.0690775	na	0.688678	0.154623	-0.615219	0.000128144	-1.62944	ENSRNOG00000033335	centromere protein I(Cenpi)
Cenpj	0.00450042	0.355248	0.0917072	0.379867	0.0148421	0.692152	3.54183e-12	1.0449	0.0350425	0.375827	ENSRNOG00000022597	centromere protein J(Cenpj)
Cenpk	0.00301529	-0.622574	0.343407	-0.521587	na	-0.268583	0.00256631	-0.976501	0.0578278	-0.679787	ENSRNOG00000039740	centromere protein K(Cenpk)
Cenpl	0.403187	0.128946	0.985523	-0.0115053	0.643914	0.279311	0.0046049	0.305309	0.818308	0.0363153	ENSRNOG00000038789	centromere protein L(Cenpl)
Cenpm	0.0477242	-0.593293	0.00950001	0.751313	0.66506	0.905915	0.119786	0.415188	0.019081	-0.654192	ENSRNOG00000023262	centromere protein M(Cenpm)
Cenpn	0.000794241	-0.64845	0.697994	0.183906	0.999979	-0.025929	0.102647	-0.361442	0.139804	-0.349971	ENSRNOG00000011296	centromere protein N(Cenpn)
Cenpo	0.745426	0.0732384	0.960887	-0.0357315	0.999979	-0.0117406	0.799936	-0.0592447	0.804515	-0.0613494	ENSRNOG00000050111	centromere protein O(Cenpo)
Cenpp	0.573771	-0.303749	0.996282	0.0157061	0.999979	0.0836685	0.693253	-0.248139	0.292804	-0.619342	ENSRNOG00000062220	-
Cenpt	0.00344961	-0.829199	0.694437	-0.399991	na	-0.321007	2.25787e-07	-2.27811	8.96627e-06	-2.06443	ENSRNOG00000024178	centromere protein T(Cenpt)
Cenpu	0.0114812	-0.657537	0.687316	-0.351413	0.999979	0.239904	0.631393	-0.230652	0.36671	-0.420396	ENSRNOG00000022261	centromere protein U(Cenpu)
Cenpw	0.189024	-0.700202	0.494606	-0.788579	0.999979	-0.201468	8.43363e-05	-2.4893	0.00168559	-2.08998	ENSRNOG00000042944	centromere protein W(Cenpw)
Cep104	0.807775	0.0722344	0.590729	0.211127	0.943027	0.182701	0.00188759	0.568598	0.0593874	0.386107	ENSRNOG00000025000	centrosomal protein 104(Cep104)
Cep120	1.04429e-05	0.489341	0.616638	0.14493	0.996137	0.269037	0.000640463	0.4469	0.286786	0.170532	ENSRNOG00000017035	centrosomal protein 120(Cep120)
Cep128	0.253471	0.181509	0.539117	0.185039	0.999979	0.172355	0.0741775	0.281183	0.631912	0.095536	ENSRNOG00000003908	centrosomal protein 128(Cep128)
Cep131	0.652248	0.203881	0.731972	0.258373	0.762547	-0.651433	0.566838	-0.225777	0.293038	0.390997	ENSRNOG00000004430	centrosomal protein 131(Cep131)
Cep135	0.667125	0.109463	0.237884	0.22826	0.999979	0.096222	0.0344154	0.26623	0.220187	0.176395	ENSRNOG00000002153	centrosomal protein 135(Cep135)
Cep162	0.00575957	0.428666	0.938011	-0.0452812	0.999979	-0.180748	0.93009	-0.0192528	0.38128	0.171024	ENSRNOG00000010608	centrosomal protein 162(Cep162)
Cep164	0.961119	0.0192796	0.510413	0.25105	0.999979	-0.0871081	0.302028	0.227938	0.160563	0.312179	ENSRNOG00000029826	centrosomal protein 164(Cep164)
Cep170	0.28657	0.221469	0.657267	0.134136	0.999979	-0.042064	0.443141	0.122855	0.345894	0.154839	ENSRNOG00000004127	-
Cep170b	0.894128	0.109815	0.984401	-0.0666311	0.999979	-0.311146	0.980529	-0.0212769	0.819435	0.202852	ENSRNOG00000033688	centrosomal protein 170B(Cep170b)
Cep19	0.0249471	-0.320515	0.573688	-0.228685	0.999979	0.218159	0.947417	-0.0177857	0.220135	-0.282453	ENSRNOG00000024924	centrosomal protein 19(Cep19)
Cep192	0.53508	-0.0893998	0.673639	-0.108392	0.999979	0.0986686	0.917042	0.0164116	0.54169	-0.0893425	ENSRNOG00000042879	SEH1-like (S. cerevisiae)(Seh1l)
Cep250	0.234505	0.199912	0.455167	0.225115	0.999979	-0.153231	0.844359	-0.0435548	0.650941	0.0982282	ENSRNOG00000019340	centrosomal protein 250(Cep250)
Cep290	0.772463	-0.0670722	0.611875	0.208691	0.999979	-0.0948526	0.0805423	0.354209	0.0182899	0.483438	ENSRNOG00000056458	centrosomal protein 290(Cep290)
Cep295	0.0877796	0.320627	0.927651	0.057566	0.999979	0.0124661	0.388477	0.178672	0.408043	0.181387	ENSRNOG00000010999	centrosomal protein 295(Cep295)
Cep350	0.171161	0.301434	0.734306	0.156092	0.997128	0.245174	7.02111e-05	0.720099	0.0168608	0.482447	ENSRNOG00000003882	centrosomal protein 350(Cep350)
Cep41	0.762618	-0.0540881	0.852834	-0.170549	0.999979	0.0295929	0.0192018	-0.772361	0.0150271	-0.839864	ENSRNOG00000010950	centrosomal protein 41(Cep41)
Cep44	0.469347	0.115968	0.817351	-0.0719826	0.743342	0.262646	0.00010043	0.429757	0.174004	0.180907	ENSRNOG00000010566	centrosomal protein 44(Cep44)
Cep55	0.25208	-0.339579	0.854826	-0.241257	0.999979	-0.692875	0.00378802	-1.34211	0.330751	-0.540505	ENSRNOG00000016377	centrosomal protein 55(Cep55)
Cep57	0.757959	0.0482614	0.825626	-0.0695907	0.999979	0.0537292	0.0362674	-0.251359	0.00877837	-0.322969	ENSRNOG00000006792	centrosomal protein 57(Cep57)
Cep57l1	0.374895	0.13925	0.927651	-0.0425629	0.762069	0.226297	0.972914	0.00634497	0.12189	-0.230678	ENSRNOG00000000303	centrosomal protein 57-like 1(Cep57l1)
Cep63	0.786483	0.0465948	0.487169	-0.146079	0.999979	-0.0701748	0.420134	-0.103965	0.922217	-0.015951	ENSRNOG00000008410	centrosomal protein 63(Cep63)
Cep68	0.235399	-0.250005	0.916024	0.0653574	0.999979	-0.158563	0.273583	-0.229644	0.863722	-0.0459306	ENSRNOG00000027282	centrosomal protein 68(Cep68)
Cep70	0.822128	-0.0646993	0.503783	-0.385776	0.23271	-0.609354	0.0236053	-0.69067	0.867164	-0.0716727	ENSRNOG00000022845	centrosomal protein 70(Cep70)
Cep72	0.807609	-0.180888	0.955571	-0.0886793	0.999979	-0.0329968	0.0197667	-0.989479	0.02625	-1.00536	ENSRNOG00000015465	centrosomal protein 72(Cep72)
Cep76	0.997444	0.00175982	0.252858	-0.58517	0.961446	-0.501682	0.707455	-0.156145	0.416553	0.316396	ENSRNOG00000021918	centrosomal protein 76(Cep76)
Cep78	0.690573	-0.199006	0.851564	-0.178861	0.999979	-0.331519	0.289753	-0.404172	0.761097	-0.144073	ENSRNOG00000014041	centrosomal protein 78(Cep78)
Cep83	0.520952	0.12016	0.991949	-0.0102371	0.954449	-0.217401	0.596515	-0.102152	0.565165	0.114521	ENSRNOG00000007859	centrosomal protein 83(Cep83)
Cep85	0.260298	0.154126	0.114083	0.289121	0.999979	0.0886187	0.174429	0.194172	0.486717	0.115068	ENSRNOG00000016249	centrosomal protein 85(Cep85)
Cep85l	0.380856	-0.333745	0.549354	0.277184	0.935343	-0.401677	0.00395744	0.633227	1.97346e-06	1.02529	ENSRNOG00000000414	centrosomal protein 85-like(Cep85l)
Cep89	0.48264	-0.133414	0.638695	-0.142514	0.580769	0.263225	0.581862	-0.093811	0.0137884	-0.363799	ENSRNOG00000012140	centrosomal protein 89(Cep89)
Cep95	0.00220072	0.562238	0.250784	0.286978	0.999979	0.218212	0.000187074	0.567723	0.0403788	0.350949	ENSRNOG00000014354	centrosomal protein 95(Cep95)
Cep97	0.00879128	0.409762	0.898014	-0.0557891	0.999979	0.134961	6.85788e-06	0.570058	0.000802517	0.459411	ENSRNOG00000001609	centrosomal protein 97(Cep97)
Cept1	0.333088	-0.111535	0.395563	0.207039	0.494426	0.575306	0.000115662	0.513249	0.736615	-0.0649454	ENSRNOG00000017723	choline/ethanolamine phosphotransferase 1(Cept1)
Cercam	0.617758	0.194461	0.849912	0.156687	0.999979	-0.211276	0.0523423	0.579476	0.0217206	0.704551	ENSRNOG00000026604	cerebral endothelial cell adhesion molecule(Cercam)
Cerk	1.03072e-16	0.7534	0.983265	0.0171283	0.999979	-0.116515	0.0657833	0.297254	0.00940756	0.421733	ENSRNOG00000017022	ceramide kinase(Cerk)
Cers2	0.827113	0.0280937	0.956341	0.0263831	0.999979	-0.0114742	0.473034	-0.102553	0.474191	-0.108122	ENSRNOG00000021138	ceramide synthase 2(Cers2)
Cers4	0.675712	0.0904887	0.993585	0.0111664	0.999979	-0.143293	0.680614	-0.109826	0.939126	0.02374	ENSRNOG00000001072	ceramide synthase 4(Cers4)
Cers5	0.0962093	0.173808	0.873494	-0.038429	0.999979	-0.102771	0.609901	-0.0514112	0.626779	0.05165	ENSRNOG00000052990	ceramide synthase 5(Cers5)
Cers6	0.324625	0.516725	0.478614	-0.43284	0.156997	-0.838191	0.212796	0.420665	8.20007e-05	1.1898	ENSRNOG00000024595	ceramide synthase 6(Cers6)
Cert1	0.0404015	0.365197	0.120352	0.302036	0.997128	0.183192	1.79796e-11	0.841428	7.24945e-07	0.667087	ENSRNOG00000015686	collagen type IV alpha 3 binding protein(Col4a3bp)
Cetn2	0.00952488	-0.220561	0.509878	-0.136719	0.999979	0.0640292	0.0877203	-0.192726	0.0221139	-0.261668	ENSRNOG00000059593	centrin 2(Cetn2)
Cetn3	0.00118811	-0.324205	0.518961	-0.132961	0.999979	-0.043706	0.0360767	-0.226584	0.106551	-0.189956	ENSRNOG00000048563	centrin 3(Cetn3)
Cfap157	0.316411	-0.808625	0.680126	-0.525849	0.999979	-0.211043	0.729426	0.235833	0.543044	0.402556	ENSRNOG00000039315	cilia and flagella associated protein 157(Cfap157)
Cfap20	0.000655726	-0.345764	0.469028	-0.198059	0.999979	-0.184924	0.0203792	-0.344508	0.440828	-0.139772	ENSRNOG00000042179	cilia and flagella associated protein 20(Cfap20)
Cfap298	0.235053	-0.151675	0.841071	-0.0657234	0.999979	-0.0895689	0.126	-0.193755	0.477692	-0.105349	ENSRNOG00000021399	similar to RIKEN cDNA 1110004E09(RGD1306954)
Cfap36	0.00450997	-0.321327	0.370318	-0.196739	0.999979	-0.101023	0.012687	-0.319664	0.113574	-0.22619	ENSRNOG00000003901	cilia and flagella associated protein 36(Cfap36)
Cfap410	0.385525	-0.254168	0.964599	-0.035592	0.763186	-0.330034	0.0025382	-0.568354	0.286617	-0.23799	ENSRNOG00000001215	similar to RIKEN cDNA 1810043G02; DNA segment, Chr 10, Johns Hopkins University 13, expressed(RGD1309594)
Cfap53	na	na	0.774499	-0.575283	0.999979	0.431937	0.228339	0.943313	0.526113	0.585781	ENSRNOG00000014585	cilia and flagella associated protein 53(Cfap53)
Cfap70	0.0912903	0.63011	0.881959	0.161865	0.999979	0.244881	0.0193418	-0.876393	0.00192713	-1.20523	ENSRNOG00000007046	cilia and flagella associated protein 70(Cfap70)
Cfap77	0.803274	-0.127202	0.972083	-0.0666902	0.999979	0.0906276	0.0219345	-0.974651	0.00918552	-1.16736	ENSRNOG00000028805	cilia and flagella associated protein 77(Cfap77)
Cfap97	0.93596	0.0223172	0.925393	-0.0837508	0.800097	0.387538	0.301797	0.297796	0.744805	-0.116091	ENSRNOG00000032192	cilia and flagella associated protein 97(Cfap97)
Cfdp1	0.0661609	-0.201773	0.999876	0.000325754	0.999979	-0.0617128	0.582305	-0.083661	0.844313	-0.0351728	ENSRNOG00000019326	craniofacial development protein 1(Cfdp1)
Cfl1	3.50257e-09	-0.43924	0.0370918	-0.244625	0.999979	-0.199409	4.26522e-25	-0.862027	4.23282e-14	-0.667958	ENSRNOG00000020660	cofilin 1(Cfl1)
Cfl2	0.894556	0.0428329	0.832524	0.172356	0.494378	0.498136	0.605912	0.193222	0.38643	-0.319433	ENSRNOG00000045892	cofilin 2(Cfl2)
Cflar	0.233636	0.144737	1.47402e-06	0.412008	0.000120126	0.526717	1.86697e-13	0.574488	0.669876	0.0495115	ENSRNOG00000012473	CASP8 and FADD-like apoptosis regulator(Cflar)
Cfp	0.888035	0.141603	0.978967	0.0598961	0.999979	-0.219954	0.32699	0.49598	0.117547	0.77184	ENSRNOG00000025811	complement factor properdin(Cfp)
Cgas	0.233699	0.463652	0.89223	0.104324	0.999979	-0.0520339	0.0037444	0.679041	0.00443488	0.701595	ENSRNOG00000046191	Mab-21 domain containing 1(Mb21d1)
Cggbp1	1.92493e-06	0.508388	0.933596	0.0624707	0.931882	0.238424	0.880731	-0.043049	0.27828	-0.268705	ENSRNOG00000000718	CGG triplet repeat binding protein 1(Cggbp1)
Cgrrf1	0.475159	0.171472	0.547684	0.208081	0.590973	0.398572	0.00406983	0.482168	0.77381	0.0696569	ENSRNOG00000010178	cell growth regulator with ring finger domain 1(Cgrrf1)
Chac1	na	na	0.000231917	1.71999	0.127358	1.02342	1.79161e-21	3.61201	8.20728e-10	2.55006	ENSRNOG00000014387	ChaC glutathione-specific gamma-glutamylcyclotransferase 1(Chac1)
Chac2	0.410728	-0.274689	0.65687	-0.173093	0.901086	0.307543	0.175218	0.249006	0.751216	-0.0771931	ENSRNOG00000001531	ChaC cation transport regulator 2(Chac2)
Chaf1a	0.788212	-0.0763978	0.522125	0.340577	0.999979	-0.260001	0.843856	-0.072757	0.556668	0.205558	ENSRNOG00000046479	chromatin assembly factor 1 subunit A(Chaf1a)
Chaf1b	0.000903959	-0.662208	0.78827	-0.439979	0.999979	-0.0645206	0.0328893	-1.40502	0.0271352	-1.52252	ENSRNOG00000001692	chromatin assembly factor 1 subunit B(Chaf1b)
Champ1	0.579175	0.0820618	0.937775	0.0430634	0.999979	0.0575109	0.494548	-0.124782	0.313938	-0.183938	ENSRNOG00000000112	chromosome alignment maintaining phosphoprotein 1(Champ1)
Chchd1	5.22124e-05	-0.396284	0.0981628	-0.266214	0.999979	-0.0118932	0.0123639	-0.295338	0.0433005	-0.257788	ENSRNOG00000009297	coiled-coil-helix-coiled-coil-helix domain containing 1(Chchd1)
Chchd3	0.0092278	-0.244009	0.834278	0.0432994	0.999979	0.0707293	0.475701	-0.0641218	0.0876739	-0.143569	ENSRNOG00000013211	coiled-coil-helix-coiled-coil-helix domain containing 3(Chchd3)
Chchd4	na	-0.710346	0.909798	-0.197623	0.948663	-0.679761	0.436903	-0.486291	0.863007	0.127705	ENSRNOG00000033038	coiled-coil-helix-coiled-coil-helix domain containing 4(LOC100361898)
Chchd5	0.821999	-0.0442469	0.991479	-0.00662684	0.999979	-0.0292329	0.796403	0.0335043	0.55981	0.0724735	ENSRNOG00000018491	coiled-coil-helix-coiled-coil-helix domain containing 5(Chchd5)
Chchd6	2.88242e-08	-0.727612	0.393383	-0.307694	0.999979	-0.228523	9.52391e-05	-0.773674	0.0122643	-0.546008	ENSRNOG00000060248	coiled-coil-helix-coiled-coil-helix domain containing 6(Chchd6)
Chchd7	0.739263	-0.13722	0.899873	-0.0791829	0.999979	-0.170141	0.53495	-0.145834	0.961712	-0.0147937	ENSRNOG00000031769	coiled-coil-helix-coiled-coil-helix domain containing 7(Chchd7)
Chd1	0.000168937	0.380544	0.759589	0.0909643	0.999979	0.0793495	0.820429	0.0375591	0.808615	-0.0421199	ENSRNOG00000014434	chromodomain helicase DNA binding protein 1(Chd1)
Chd1l	0.291246	0.153634	0.96864	0.0200393	0.999979	0.0837794	0.437312	0.103629	0.923687	0.0160862	ENSRNOG00000017669	chromodomain helicase DNA binding protein 1-like(Chd1l)
Chd2	1.03049e-15	0.834348	0.654824	0.183534	0.999979	0.160488	0.000301823	0.648813	0.00850292	0.512462	ENSRNOG00000012716	chromodomain helicase DNA binding protein 2(Chd2)
Chd3	0.556379	0.0985384	0.641971	0.252412	0.999979	-0.072332	0.329556	0.27709	0.182461	0.380982	ENSRNOG00000009722	chromodomain helicase DNA binding protein 3(Chd3)
Chd4	0.603973	0.0578255	0.597636	-0.11135	0.904285	-0.168498	0.029115	-0.224004	0.657668	-0.059352	ENSRNOG00000018309	chromodomain helicase DNA binding protein 4(Chd4)
Chd6	0.00337587	0.430254	0.622183	0.181584	0.999979	-0.114466	0.130054	0.277039	0.0313895	0.394173	ENSRNOG00000016744	chromodomain helicase DNA binding protein 6(Chd6)
Chd7	0.0200063	0.356965	0.941068	0.0522881	0.696323	-0.499037	0.0196586	0.452955	1.22532e-06	0.906988	ENSRNOG00000006689	chromodomain helicase DNA binding protein 7(Chd7)
Chd8	0.00133367	0.332861	0.399362	0.190821	0.999979	0.167487	0.146461	0.201406	0.856171	0.0340248	ENSRNOG00000025011	chromodomain helicase DNA binding protein 8(Chd8)
Chd9	0.480796	0.155519	0.881859	0.105491	0.999979	0.0547792	0.789595	0.0836313	0.982161	-0.00888422	ENSRNOG00000049302	chromodomain helicase DNA binding protein 9(Chd9)
Chek2	0.709402	-0.0786273	0.51198	-0.1807	0.999979	0.121427	1.16931e-07	-0.712044	2.55126e-10	-0.891341	ENSRNOG00000037509	checkpoint kinase 2(Chek2)
Cherp	0.420855	-0.170372	0.859765	0.125153	0.999979	0.0125711	0.508839	-0.194646	0.702366	-0.127155	ENSRNOG00000012323	calcium homeostasis endoplasmic reticulum protein(Cherp)
Chfr	0.00227572	0.287175	0.935627	-0.0287052	0.726066	0.183661	0.0237384	0.227034	0.753332	0.0436228	ENSRNOG00000037430	checkpoint with forkhead and ring finger domains(Chfr)
Chic1	0.538169	0.376852	0.712468	0.266374	0.999979	0.305259	0.224727	0.406431	0.770974	0.126882	ENSRNOG00000037919	cysteine-rich hydrophobic domain 1(Chic1)
Chic2	1.74153e-08	0.854164	0.74978	0.166763	0.999979	-0.0156821	0.482769	0.178679	0.498955	0.182476	ENSRNOG00000002267	cysteine-rich hydrophobic domain 2(Chic2)
Chid1	na	na	0.941068	-0.734613	0.999979	-0.638478	0.811366	0.867908	0.376392	2.85672	ENSRNOG00000019351	chitinase domain-containing protein 1-like(LOC100911881)
Chka	0.450502	-0.176532	0.621337	0.1474	0.26293	-0.495295	0.00227005	-0.422534	0.642338	0.0850229	ENSRNOG00000016791	choline kinase alpha(Chka)
Chkb	0.481513	0.100578	0.902562	-0.0470553	0.787078	-0.183882	0.726629	-0.054873	0.373481	0.128987	ENSRNOG00000011404	choline kinase beta(Chkb)
Chm	0.134172	0.208376	0.30819	-0.267705	0.762547	0.231743	0.14866	0.247627	0.972387	0.0092294	ENSRNOG00000000161	CHM, Rab escort protein 1(Chm)
Chmp1a	0.0968413	0.158417	0.72544	0.0847308	0.997128	0.172106	0.264565	0.126777	0.800514	-0.0367519	ENSRNOG00000016001	charged multivesicular body protein 1A(Chmp1a)
Chmp2a	0.171161	-0.137436	0.302779	-0.180013	0.999979	-0.140342	0.25853	-0.134582	0.908227	0.0181603	ENSRNOG00000043328	charged multivesicular body protein 2A(Chmp2a)
Chmp2b	0.295878	-0.132135	0.800751	0.0851082	0.980362	0.163723	0.00176839	0.395858	0.110651	0.230702	ENSRNOG00000040257	charged multivesicular body protein 2B(Chmp2b)
Chmp3	0.599341	-0.0823088	0.689287	0.0914337	0.999979	0.0894599	0.00211097	0.299562	0.059476	0.205363	ENSRNOG00000007356	charged multivesicular body protein 3(Chmp3)
Chmp4bl1	na	na	0.750634	0.419879	0.695779	-1.19268	0.0470112	-1.26003	0.986378	-0.0154326	ENSRNOG00000034071	chromatin modifying protein 4B-like 1(Chmp4bl1)
Chmp5	0.892762	-0.0225866	0.673518	0.0823061	0.999979	0.20025	6.01194e-09	0.459813	0.00392326	0.258073	ENSRNOG00000008672	charged multivesicular body protein 5(Chmp5)
Chmp6	0.176089	-0.17079	0.567938	-0.118232	0.606896	-0.198953	0.131704	-0.163151	0.793786	0.0374869	ENSRNOG00000004014	charged multivesicular body protein 6(Chmp6)
Chmp7	0.00992644	0.329162	0.61114	0.134588	0.999979	-0.114258	0.690163	0.0637215	0.227186	0.174481	ENSRNOG00000016939	charged multivesicular body protein 7(Chmp7)
Chn2	0.719474	0.108201	0.491028	0.261405	0.999979	-0.0101192	0.542849	0.14733	0.46417	0.182602	ENSRNOG00000009411	chimerin 2(Chn2)
Chordc1	1.44113e-05	-0.356187	0.311032	-0.235337	0.999979	0.105158	0.0917926	-0.252125	0.00815017	-0.392643	ENSRNOG00000026643	cysteine and histidine rich domain containing 1(Chordc1)
Chp1	0.623314	0.068591	0.98919	0.00842189	0.0647197	0.300877	0.739356	0.043083	0.0135278	-0.260003	ENSRNOG00000004742	calcineurin-like EF-hand protein 1(Chp1)
Chpf	0.431789	-0.216137	0.990665	0.0181966	0.999979	0.10151	0.328845	-0.266125	0.274696	-0.308268	ENSRNOG00000020038	chondroitin polymerizing factor(Chpf)
Chpf2	0.437201	0.221672	0.591226	0.325026	0.999979	0.339	0.0629251	0.559522	0.350896	0.325526	ENSRNOG00000010466	chondroitin polymerizing factor 2(Chpf2)
Chpt1	0.641926	0.449684	0.510413	-0.983769	0.999979	-0.548805	0.173203	-1.13899	0.388404	-0.801122	ENSRNOG00000058271	choline phosphotransferase 1(Chpt1)
Chrac1	0.0179112	-0.24103	0.32982	-0.153966	0.999979	-0.0529294	0.508531	-0.0749216	0.909157	-0.0159575	ENSRNOG00000009103	chromatin accessibility complex 1(Chrac1)
Chrnb1	na	na	0.772796	-0.37053	0.999979	-0.278895	0.37805	-0.517414	0.788067	-0.191131	ENSRNOG00000014698	cholinergic receptor nicotinic beta 1 subunit(Chrnb1)
Chrne	0.000765458	0.738707	0.0547022	0.436086	0.999979	0.0330586	0.544656	-0.131618	0.449687	-0.168901	ENSRNOG00000003777	cholinergic receptor nicotinic epsilon subunit(Chrne)
Chst12	0.682084	0.15683	0.750634	-0.180261	0.999979	0.281375	0.0366027	-0.504464	0.000992068	-0.814152	ENSRNOG00000001252	carbohydrate sulfotransferase 12(Chst12)
Chst14	0.991035	0.00696615	0.932085	0.0841264	0.999979	-0.318526	0.00116916	-0.938658	0.0510969	-0.616083	ENSRNOG00000045997	carbohydrate sulfotransferase 14(Chst14)
Chst15	0.636112	0.0916332	0.23503	-0.381593	0.999979	0.0182119	0.113374	0.342853	0.121134	0.353627	ENSRNOG00000016267	carbohydrate sulfotransferase 15(Chst15)
Chst2	0.715989	0.334054	0.809535	-0.356261	0.927346	-0.562398	0.0043311	1.47644	0.000103829	2.02049	ENSRNOG00000047734	carbohydrate sulfotransferase 2(Chst2)
Chsy1	0.0364318	-0.487042	0.677023	0.157009	0.999979	0.0455008	0.56509	-0.118776	0.53724	-0.133399	ENSRNOG00000012698	chondroitin sulfate synthase 1(Chsy1)
Chtf18	0.319998	-0.395499	0.425421	0.547538	0.999979	0.0685196	0.372549	-0.400174	0.308197	-0.473694	ENSRNOG00000019174	chromosome transmission fidelity factor 18(Chtf18)
Chtf8	0.0674727	0.373289	0.632144	0.160076	0.999979	0.168459	0.453384	-0.136006	0.231362	-0.214693	ENSRNOG00000047246	chromosome transmission fidelity factor 8(Chtf8)
Chtop	0.190152	-0.135294	0.939775	0.0302339	0.997128	0.101675	0.000768615	0.359956	0.0295787	0.256629	ENSRNOG00000012760	similar to DKFZP547E1010 protein(LOC361990)
Chtopl1	0.25208	-0.237432	0.763304	0.140125	0.999979	0.0906415	0.00215337	0.563003	0.0201756	0.463736	ENSRNOG00000058457	chromatin target of PRMT1(Chtop)
Chuk	0.217168	0.17731	0.620008	0.159924	0.999979	0.140509	0.0462892	0.308487	0.264752	0.197095	ENSRNOG00000022485	conserved helix-loop-helix ubiquitous kinase(Chuk)
Churc1	0.951965	0.0161403	0.592174	-0.162609	0.999979	0.0826619	0.992485	0.00213402	0.635607	-0.0910446	ENSRNOG00000007336	churchill domain containing 1(Churc1)
Ciao1	0.275359	-0.237314	0.983605	0.024188	0.999979	-0.0241404	0.927041	-0.0279637	0.995742	-0.00172239	ENSRNOG00000012638	cytosolic iron-sulfur assembly component 1(Ciao1)
Ciao2a	9.52994e-05	-0.290767	0.0672298	-0.274736	0.999979	0.058378	0.403305	-0.110898	0.222196	-0.161873	ENSRNOG00000017119	family with sequence similarity 96, member A(Fam96a)
Ciao2b	0.0511597	-0.344543	0.870512	0.0757444	0.999979	-0.0722537	0.176981	0.228795	0.0683601	0.311717	ENSRNOG00000011865	family with sequence similarity 96, member B(Fam96b)
Ciao3	0.718497	-0.056948	0.758305	0.0672778	0.981124	-0.087762	0.545548	-0.0656523	0.862239	0.0222534	ENSRNOG00000019522	nuclear prelamin A recognition factor-like(Narfl)
Ciapin1	1.64585e-05	-0.400227	0.940986	-0.0421981	0.999979	-0.104341	0.206403	-0.216284	0.645077	-0.0952989	ENSRNOG00000016234	cytokine induced apoptosis inhibitor 1(Ciapin1)
Ciart	0.624502	0.147603	0.913219	0.0995513	0.875313	-0.4432	0.918696	-0.038589	0.145639	0.449159	ENSRNOG00000042717	circadian associated repressor of transcription(Ciart)
Cib1	0.111826	-0.168217	0.75051	-0.0918093	0.503854	-0.271618	0.644566	-0.068987	0.158959	0.189526	ENSRNOG00000033498	calcium and integrin binding 1(Cib1)
Cic	0.60509	0.165173	0.640046	0.237964	0.999979	-0.282734	0.856349	0.0572925	0.217949	0.330666	ENSRNOG00000056118	capicua transcriptional repressor(Cic)
Cilp2	0.575423	-0.412116	0.951741	-0.138624	0.999979	0.0845478	0.179416	-0.874286	0.130806	-1.03859	ENSRNOG00000020622	cartilage intermediate layer protein 2(Cilp2)
Cinp	0.104028	-0.549535	0.988763	0.0245372	0.999979	0.0219559	0.544128	-0.192457	0.553576	-0.199444	ENSRNOG00000008035	cyclin-dependent kinase 2-interacting protein(Cinp)
Cip2a	0.0126697	-0.709046	0.811443	-0.235293	0.999979	0.209474	0.162258	-0.570617	0.0877387	-0.717013	ENSRNOG00000039183	similar to RIKEN cDNA C330027C09(RGD1310335)
Cipc	0.15374	0.172934	0.996282	-0.00407094	0.925826	0.170365	0.247044	-0.158372	0.0152982	-0.318539	ENSRNOG00000011111	CLOCK-interacting pacemaker(Cipc)
Cir1	1.86298e-05	0.447255	0.65403	0.137882	0.999979	-0.0228576	0.138635	0.221094	0.146643	0.228659	ENSRNOG00000018719	corepressor interacting with RBPJ, 1(Cir1)
Cirbp	0.0412428	0.373959	0.127304	0.41584	0.999979	0.0717094	0.211985	0.265341	0.254634	0.258979	ENSRNOG00000015999	cold inducible RNA binding protein(Cirbp)
Cisd1	1.3695e-06	-0.414046	0.00141609	-0.313865	0.999979	-0.102643	8.64958e-05	-0.335973	0.0110242	-0.239652	ENSRNOG00000000610	CDGSH iron sulfur domain 1(Cisd1)
Cisd2	0.0530966	-0.236621	0.485992	-0.14971	0.999979	0.0353475	0.215752	0.153498	0.392127	0.117804	ENSRNOG00000048258	CDGSH iron sulfur domain 2(Cisd2)
Cisd3	0.472811	0.120835	0.442849	-0.207191	0.159704	-0.435541	9.17599e-09	-0.797587	0.014673	-0.384195	ENSRNOG00000036894	CDGSH iron sulfur domain 3(Cisd3)
Cish	0.0210757	-0.366686	0.684678	-0.215195	0.846853	-0.432282	0.136568	-0.373573	0.832375	0.0711264	ENSRNOG00000029543	cytokine inducible SH2-containing protein(Cish)
Cit	0.37587	-0.768577	0.722861	-0.731535	0.999979	-0.0156284	0.0146139	-2.34639	0.0395649	-2.10937	ENSRNOG00000001143	citron rho-interacting serine/threonine kinase(Cit)
Cited2	0.000231706	0.65345	0.902145	0.051559	0.999979	0.0412108	0.111212	-0.221869	0.0853093	-0.25031	ENSRNOG00000056940	Cbp/p300-interacting transactivator, with Glu/Asp-rich carboxy-terminal domain, 2(Cited2)
Ciz1	0.9995	0.000122201	0.939186	0.0282203	0.940291	-0.175923	0.344966	-0.109323	0.652207	0.0604586	ENSRNOG00000013442	CDKN1A interacting zinc finger protein 1(Ciz1)
Ckap2	0.00384447	-0.444833	0.491471	-0.331521	0.999979	-0.0201943	0.00263137	-0.752707	0.00283555	-0.7864	ENSRNOG00000024650	cytoskeleton associated protein 2(Ckap2)
Ckap2l	na	-0.599262	0.606678	-0.906368	0.999979	-0.273062	0.274342	-1.01396	0.412902	-0.829693	ENSRNOG00000026143	cytoskeleton associated protein 2-like(Ckap2l)
Ckap5	0.301992	0.134639	0.275014	-0.230612	0.999979	0.0989803	0.143041	-0.208642	0.0234546	-0.320757	ENSRNOG00000016067	cytoskeleton associated protein 5(Ckap5)
Ckb	0.260849	-0.622861	0.859546	0.221584	0.97843	-0.734358	0.179416	-0.650856	0.987833	0.0106099	ENSRNOG00000010872	creatine kinase B(Ckb)
Cklf	0.116518	0.310983	0.860547	0.0846735	0.999979	0.0889236	0.00153657	0.507101	0.0170515	0.416179	ENSRNOG00000012752	chemokine-like factor(Cklf)
Cks1b	0.00797854	-0.302573	0.841071	-0.0800073	0.999979	0.144205	0.0001309	-0.532722	4.71488e-07	-0.718441	ENSRNOG00000042561	CDC28 protein kinase regulatory subunit 1B(Cks1b)
Cks2	5.76768e-14	-0.912263	0.00125604	-0.887127	0.997128	-0.6773	2.06153e-08	-1.3124	0.045206	-0.544482	ENSRNOG00000014130	CDC28 protein kinase regulatory subunit 2(Cks2)
Clasp1	0.504826	0.14452	0.795135	0.156291	0.999979	0.0442469	0.480132	0.195877	0.632807	0.147419	ENSRNOG00000002376	cytoplasmic linker associated protein 1(Clasp1)
Clasp2	0.992114	0.00249169	0.962186	0.0516503	0.999979	0.202041	0.598313	-0.17194	0.13681	-0.441069	ENSRNOG00000009161	cytoplasmic linker associated protein 2(Clasp2)
Clasrp	0.0193118	0.34243	0.431711	0.271391	0.999979	-0.2842	0.971351	-0.00969268	0.198683	0.282731	ENSRNOG00000046000	CLK4-associating serine/arginine rich protein(Clasrp)
Clba1	0.764561	-0.273989	0.669667	-0.619308	0.999979	0.0867268	0.192475	-0.931035	0.152722	-1.08273	ENSRNOG00000013690	LOC362793(RGD1307315)
Clcc1	0.418841	0.123309	0.930799	0.0271574	0.999979	0.0309908	3.98169e-07	0.4058	1.43207e-05	0.370428	ENSRNOG00000020360	chloride channel CLIC-like 1(Clcc1)
Clcf1	0.00201428	0.52875	0.736092	0.183454	0.999979	-0.369708	0.615738	-0.143508	0.49965	0.192826	ENSRNOG00000018752	cardiotrophin-like cytokine factor 1(Clcf1)
Clcn3	0.856754	-0.0392891	0.798843	0.156361	0.650219	0.379156	0.0106497	0.603279	0.50368	0.199201	ENSRNOG00000010682	chloride voltage-gated channel 3(Clcn3)
Clcn5	0.877304	-0.128362	0.842809	-0.265	0.886781	0.61271	0.806336	0.15421	0.4629	-0.443329	ENSRNOG00000002862	chloride voltage-gated channel 5(Clcn5)
Clcn6	0.118906	0.236808	0.949614	0.0405488	0.999979	0.0234449	0.0567174	0.325306	0.129429	0.281126	ENSRNOG00000008345	chloride voltage-gated channel 6(Clcn6)
Clcn7	0.000428359	0.441485	0.607795	0.189257	0.999979	0.0178931	0.0143906	0.425065	0.0163839	0.439053	ENSRNOG00000016976	chloride voltage-gated channel 7(Clcn7)
Clcnkb	0.741143	-0.311983	0.964599	0.140385	0.140024	-2.08669	0.366714	-0.80663	0.360123	0.806989	ENSRNOG00000009897	chloride voltage-gated channel Kb(Clcnkb)
Cldn10	0.963254	0.0455653	0.0419432	-1.75912	0.999979	-0.253795	0.154539	-0.952898	0.215824	-0.8989	ENSRNOG00000010085	claudin 10(Cldn10)
Cldn12	0.398046	0.139559	0.954962	0.0258358	0.999979	0.108931	0.179925	0.166661	0.767005	0.047944	ENSRNOG00000039862	claudin 12(Cldn12)
Cldnd1	0.468411	0.0935305	0.348353	0.296343	0.914758	0.487863	0.989586	0.00374906	0.0266642	-0.444032	ENSRNOG00000001657	claudin domain containing 1(Cldnd1)
Clec16a	0.544801	0.189311	0.725715	0.209	0.971867	0.3958	0.619052	0.156319	0.39248	-0.264931	ENSRNOG00000057378	C-type lectin domain family 16, member A(Clec16a)
Clec2d2	0.941643	0.0164633	0.00167535	-0.531677	0.873467	-0.388826	0.759675	0.0615333	0.00399938	0.450996	ENSRNOG00000059890	C-type lectin domain family 2 member D2(Clec2d2)
Clec2e	0.227009	1.07856	0.871129	0.349345	0.999979	0.161892	0.739656	-0.323106	0.607537	-0.50107	ENSRNOG00000052128	C-type lectin domain family 2, member E(Clec2e)
Clec2g	0.0209596	0.348685	0.0947944	0.415256	0.999979	0.219743	0.0239935	0.418079	0.425111	0.178902	ENSRNOG00000059538	C-type lectin domain family 2, member G(Clec2g)
Clec3b	na	na	0.862829	0.355189	0.892463	-0.779161	0.81812	0.220252	0.260919	0.901293	ENSRNOG00000004540	C-type lectin domain family 3, member B(Clec3b)
Clic1	0.0608804	-0.21648	0.651718	0.132153	0.999979	0.0744393	0.395749	-0.130968	0.227445	-0.186973	ENSRNOG00000029682	chloride intracellular channel 1(Clic1)
Clic2	0.486288	0.61129	0.566674	-0.961881	0.0319375	-2.3549	0.781998	-0.292968	0.084756	1.45525	ENSRNOG00000000728	chloride intracellular channel 2(Clic2)
Clic3	0.377213	0.255876	0.771788	0.126921	0.999979	-0.172118	0.658676	0.0973642	0.17781	0.267002	ENSRNOG00000015184	chloride intracellular channel 3(Clic3)
Clic4	0.892575	0.0470622	1.25432e-05	1.30258	0.00101183	1.67142	2.47086e-05	1.18118	0.191274	-0.452975	ENSRNOG00000018109	chloride intracellular channel 4(Clic4)
Clint1	0.465568	-0.116703	0.863286	0.0859738	0.999979	-0.0796707	0.977603	0.00685557	0.757105	0.0744241	ENSRNOG00000005406	clathrin interactor 1(Clint1)
Clip1	0.741144	0.0492878	0.306173	-0.164108	0.999979	-0.114151	0.0194509	-0.231164	0.342955	-0.111275	ENSRNOG00000001247	CAP-GLY domain containing linker protein 1(Clip1)
Clip2	0.139473	-0.475081	0.842666	0.128246	0.999979	0.251866	0.0498417	-0.482004	0.00136885	-0.798792	ENSRNOG00000021611	CAP-GLY domain containing linker protein 2(Clip2)
Clk1	1.48052e-09	0.686046	0.778894	0.0977456	0.999979	0.177629	0.00121209	0.436041	0.0774036	0.267586	ENSRNOG00000025768	CDC-like kinase 1(Clk1)
Clk3	0.00222966	0.28867	0.490879	0.100533	0.999979	-0.00792402	0.000654192	0.252111	0.000776497	0.261159	ENSRNOG00000030126	CDC-like kinase 3(Clk3)
Clk4	5.98215e-09	0.699225	0.693684	0.128121	0.999979	0.174063	0.00062666	0.470573	0.0550656	0.296549	ENSRNOG00000003714	CDC-like kinase 4(Clk4)
Cln3	0.858232	-0.0422873	0.982504	0.0145457	0.999979	-0.0438111	0.533231	0.0971591	0.345637	0.146226	ENSRNOG00000019103	ceroid-lipofuscinosis, neuronal 3(Cln3)
Cln6	0.477173	0.142848	0.912492	0.0590962	0.874613	-0.304937	0.00051197	-0.553652	0.149594	-0.266902	ENSRNOG00000007164	ceroid-lipofuscinosis, neuronal 6, late infantile, variant(Cln6)
Cln8	0.359211	0.210617	0.95643	0.0360786	0.929079	0.249076	0.00014757	0.58869	0.0522434	0.344535	ENSRNOG00000012565	ceroid-lipofuscinosis, neuronal 8(Cln8)
Clns1a	0.0143777	-0.206313	0.0624705	-0.208333	0.999979	-0.0443007	6.7056e-07	-0.398976	6.08015e-05	-0.344813	ENSRNOG00000012788	chloride nucleotide-sensitive channel 1A(Clns1a)
Clock	0.852956	-0.0440428	0.970977	-0.0379228	0.999979	0.193623	0.288652	0.266704	0.806246	0.0783636	ENSRNOG00000002175	clock circadian regulator(Clock)
Clp1	0.769964	0.0499523	0.998104	0.0025619	0.999979	0.0150224	0.119466	0.19551	0.185982	0.179041	ENSRNOG00000007416	cleavage and polyadenylation factor I subunit 1(Clp1)
Clpb	0.00037006	-0.460686	0.678923	-0.16589	0.999979	-0.0764143	0.70296	-0.0876846	0.988133	0.00419881	ENSRNOG00000019693	ClpB homolog, mitochondrial AAA ATPase chaperonin(Clpb)
Clpp	1.55269e-09	-0.521604	0.825626	-0.0759142	0.999979	-0.222919	0.000700169	-0.422752	0.2566	-0.170486	ENSRNOG00000047052	caseinolytic mitochondrial matrix peptidase proteolytic subunit(Clpp)
Clptm1	0.000392035	0.509071	0.785061	0.121662	0.983847	-0.347655	0.131505	0.282927	0.000908032	0.591177	ENSRNOG00000018255	cleft lip and palate associated transmembrane protein 1(Clptm1)
Clptm1l	0.033391	-0.340704	0.75745	0.157449	0.534026	-0.453064	0.638612	-0.123562	0.10723	0.373809	ENSRNOG00000016923	CLPTM1-like(Clptm1l)
Clpx	0.625316	0.0651963	0.693684	-0.0942776	0.999979	0.1471	0.709504	0.0505763	0.41892	-0.10384	ENSRNOG00000030225	caseinolytic mitochondrial matrix peptidase chaperone subunit(Clpx)
Clspn	0.231041	-0.772812	0.602948	-0.692846	0.999979	-0.412638	3.295e-07	-3.80257	7.84373e-07	-4.03998	ENSRNOG00000011332	claspin(Clspn)
Clstn1	0.150416	0.487298	0.246084	0.501164	0.999979	-0.0431356	0.0170042	0.659306	0.00759916	0.763231	ENSRNOG00000016398	calsyntenin 1(Clstn1)
Clstn3	0.000223007	0.938239	0.952456	-0.0559959	0.999979	0.1036	0.00712775	-0.645121	0.0071449	-0.680402	ENSRNOG00000011156	calsyntenin 3(Clstn3)
Clta	0.243742	0.257996	0.465415	0.255857	0.999979	-0.1479	0.677379	0.100105	0.294713	0.234094	ENSRNOG00000014635	clathrin, light chain A(Clta)
Cltb	0.878776	-0.0407348	0.977351	0.0224925	0.999979	-0.136242	0.0025091	-0.485958	0.0620814	-0.333456	ENSRNOG00000017506	clathrin, light chain B(Cltb)
Cltc	0.643881	-0.0588951	0.530603	-0.114167	0.924107	0.150028	0.350146	-0.0984969	0.00770463	-0.257502	ENSRNOG00000004291	clathrin heavy chain(Cltc)
Cluap1	0.0163912	-0.25952	0.658829	0.115876	0.999979	-0.0474946	0.820596	-0.0365993	0.978074	0.00546421	ENSRNOG00000007117	clusterin associated protein 1(Cluap1)
Cluh	0.00264289	-0.523441	0.909251	0.0742833	0.999979	-0.141065	0.00474782	-0.559299	0.0499966	-0.424784	ENSRNOG00000002669	clustered mitochondria homolog(Cluh)
Cmahp	2.00075e-06	0.502039	0.547739	-0.150012	0.999979	-0.0446599	0.123351	0.204094	0.0463713	0.267675	ENSRNOG00000003094	cytidine monophospho-N-acetylneuraminic acid hydroxylase(Cmah)
Cmas	0.779422	0.102362	0.719832	-0.224284	0.95869	-0.276306	0.82965	-0.0768137	0.539356	0.205272	ENSRNOG00000013816	cytidine monophosphate N-acetylneuraminic acid synthetase(Cmas)
Cmbl	0.82117	-0.231479	0.974097	0.0799058	0.999979	-0.0698751	0.887606	0.0983145	0.795649	0.186219	ENSRNOG00000011260	carboxymethylenebutenolidase homolog(Cmbl)
Cmc1	0.284939	-0.186408	0.0678184	0.374757	0.00115833	0.73053	0.000537045	0.520679	0.232995	-0.219575	ENSRNOG00000010149	C-x(9)-C motif containing 1(Cmc1)
Cmc2	0.0115353	-0.669949	0.869245	-0.0937804	0.999979	-0.00427439	0.869479	0.0422782	0.998779	0.000358005	ENSRNOG00000011279	C-x(9)-C motif containing 2(Cmc2)
Cmc4	na	0.269042	0.791342	0.358299	0.999979	-0.434091	0.652111	0.298903	0.226509	0.729652	ENSRNOG00000056435	cx9C motif-containing protein 4-like(LOC102546764)
Cmip	0.0739065	0.316285	0.97488	0.0213942	0.997128	-0.202634	0.0899643	-0.249789	0.814702	-0.0468066	ENSRNOG00000013178	c-Maf-inducing protein(Cmip)
Cmpk1	0.160378	0.131469	0.0799862	0.270605	0.00129165	0.664057	0.000377686	0.397415	0.023939	-0.279181	ENSRNOG00000007775	cytidine/uridine monophosphate kinase 1(Cmpk1)
Cmpk2	0.0508922	0.391291	0.171679	0.424389	0.000791245	1.24478	2.38152e-06	0.928995	0.321988	-0.252719	ENSRNOG00000007690	cytidine/uridine monophosphate kinase 2(Cmpk2)
Cmss1	0.00159949	-0.350818	0.521302	-0.251263	0.999979	-0.289608	0.00453874	-0.56557	0.278313	-0.256891	ENSRNOG00000027888	cms1 ribosomal small subunit homolog (yeast)(Cmss1)
Cmtm3	0.250535	-0.157996	0.796185	-0.115065	0.816651	-0.290293	5.19864e-06	-0.747775	0.00817075	-0.480869	ENSRNOG00000010691	CKLF-like MARVEL transmembrane domain containing 3(Cmtm3)
Cmtm6	0.0261858	0.224593	0.869245	0.0531264	0.229678	0.281588	0.0140173	0.270408	0.873771	-0.025177	ENSRNOG00000010951	CKLF-like MARVEL transmembrane domain containing 6(Cmtm6)
Cmtm7	0.909729	0.0208008	0.924955	0.0302079	0.434431	-0.383787	1.6321e-05	-0.377896	0.870704	0.0215544	ENSRNOG00000010986	CKLF-like MARVEL transmembrane domain containing 7(Cmtm7)
Cmtr1	0.659764	0.0605916	0.00552624	0.462402	0.013247	0.646849	0.000497829	0.493472	0.41892	-0.145351	ENSRNOG00000000532	cap methyltransferase 1(Cmtr1)
Cmtr2	0.685939	0.076436	0.968908	-0.0218733	0.999979	0.0951273	0.858372	0.0303486	0.694487	-0.0667318	ENSRNOG00000017102	cap methyltransferase 2(Cmtr2)
Cnbp	4.20363e-05	-0.268846	0.681155	-0.0979523	0.999979	0.0064157	0.02662	-0.238663	0.0233176	-0.255379	ENSRNOG00000010239	CCHC-type zinc finger, nucleic acid binding protein(Cnbp)
Cndp2	0.00099842	-0.340179	0.255571	-0.274028	0.999979	-0.00277778	0.00359564	-0.440702	0.00322813	-0.467058	ENSRNOG00000015591	CNDP dipeptidase 2 (metallopeptidase M20 family)(Cndp2)
Cnep1r1	0.702962	0.0709537	0.76651	-0.103312	0.914758	0.232156	0.391123	0.138397	0.565165	-0.104047	ENSRNOG00000015534	CTD nuclear envelope phosphatase 1 regulatory subunit 1(Cnep1r1)
Cnga1	1.72764e-13	1.62562	0.841071	0.134839	0.999979	-0.0120469	0.789713	-0.086806	0.826435	-0.0766779	ENSRNOG00000004778	cyclic nucleotide gated channel alpha 1(Cnga1)
Cnih1	0.143671	-0.264955	0.601934	-0.186197	0.999979	-0.16128	0.646427	-0.0979183	0.870697	0.0396242	ENSRNOG00000009811	cornichon family AMPA receptor auxiliary protein 1(Cnih1)
Cnih3	na	na	0.742957	-0.503898	0.242651	-1.54287	0.209843	-0.892788	0.442801	0.556702	ENSRNOG00000022724	cornichon family AMPA receptor auxiliary protein 3(Cnih3)
Cnih4	0.0306864	0.211541	0.582144	0.145694	0.856556	0.266847	0.000315933	0.44556	0.182705	0.196103	ENSRNOG00000003717	cornichon family AMPA receptor auxiliary protein 4(Cnih4)
Cnksr3	0.0136823	-0.468143	0.188493	-0.406214	0.763186	-0.497178	4.20814e-05	-0.817044	0.186032	-0.31381	ENSRNOG00000018052	Cnksr family member 3(Cnksr3)
Cnn2	0.9757	-0.0108588	0.996282	-0.0103144	0.999979	-0.285282	0.00530388	-0.803196	0.13163	-0.489947	ENSRNOG00000043044	calponin 2(Cnn2)
Cnn3	0.00557832	-0.248591	5.82144e-06	-0.448278	0.931882	-0.306642	7.18467e-15	-0.694628	8.05609e-05	-0.389041	ENSRNOG00000011559	calponin 3(Cnn3)
Cnnm2	na	na	0.718499	0.421601	0.994235	-0.479767	0.169766	0.718487	0.017743	1.19325	ENSRNOG00000020113	cyclin and CBS domain divalent metal cation transport mediator 2(Cnnm2)
Cnnm3	0.926051	-0.0332382	0.913504	0.146582	0.999979	0.344946	0.7589	0.165504	0.557506	-0.308088	ENSRNOG00000016032	cyclin and CBS domain divalent metal cation transport mediator 3(Cnnm3)
Cnnm4	0.841072	0.0998122	0.787066	0.30731	na	-0.716163	0.649321	0.255868	0.196682	0.656826	ENSRNOG00000015886	cyclin and CBS domain divalent metal cation transport mediator 4(Cnnm4)
Cnot1	0.00634628	0.228355	0.720746	0.0848645	0.815034	0.259962	0.368388	0.104256	0.219769	-0.143616	ENSRNOG00000012271	CCR4-NOT transcription complex, subunit 1(Cnot1)
Cnot10	0.957994	-0.00974771	0.0171442	0.306827	0.144814	0.248062	0.0319253	0.234614	0.945471	-0.0111408	ENSRNOG00000052305	-
Cnot11	0.526125	0.208117	0.967125	-0.0495869	0.971867	-0.360415	0.920896	0.0374549	0.271568	0.352868	ENSRNOG00000023220	CCR4-NOT transcription complex, subunit 11(Cnot11)
Cnot2	0.2154	0.145359	0.992795	0.00519548	0.465274	0.18236	0.028157	0.192637	0.932835	0.0107246	ENSRNOG00000004909	CCR4-NOT transcription complex, subunit 2(Cnot2)
Cnot3	0.915256	-0.0476512	0.366858	0.532839	0.999979	-0.0592352	0.6429	0.201702	0.440931	0.328046	ENSRNOG00000053234	CCR4-NOT transcription complex, subunit 3(Cnot3)
Cnot4	0.0822724	0.218776	0.520709	0.14526	0.887024	0.205323	4.42537e-05	0.448001	0.0439737	0.251601	ENSRNOG00000010795	CCR4-NOT transcription complex, subunit 4(Cnot4)
Cnot6	0.783777	0.0942418	0.927651	-0.077656	0.999979	-0.0664274	0.575274	-0.166908	0.718624	-0.11929	ENSRNOG00000054891	CCR4-NOT transcription complex, subunit 6(Cnot6)
Cnot6l	0.307459	0.141176	0.0532931	0.255475	0.110498	0.393368	3.35424e-07	0.482964	0.45929	0.0945872	ENSRNOG00000002075	CCR4-NOT transcription complex, subunit 6-like(Cnot6l)
Cnot7	0.962955	0.00750592	0.526968	-0.133363	0.993194	0.207586	0.845355	-0.0283054	0.0492518	-0.229396	ENSRNOG00000012263	CCR4-NOT transcription complex, subunit 7(Cnot7)
Cnot8	0.541433	0.0704059	0.692862	0.0537636	0.999979	0.076027	0.121907	0.0978691	0.792966	0.0222451	ENSRNOG00000002630	CCR4-NOT transcription complex, subunit 8(Cnot8)
Cnot9	0.539081	-0.0879127	0.6789	0.0994087	0.805829	0.217329	0.111458	0.180328	0.875105	-0.0241692	ENSRNOG00000016034	CCR4-NOT transcription complex subunit 9(Cnot9)
Cnp	2.56205e-14	0.685461	0.54422	0.183209	0.999979	0.298828	0.000691738	0.496985	0.192725	0.225682	ENSRNOG00000017496	2',3'-cyclic nucleotide 3' phosphodiesterase(Cnp)
Cnppd1	5.95787e-14	0.560343	0.670199	0.109455	0.999979	0.0548896	0.247772	0.147311	0.591683	0.0801007	ENSRNOG00000018325	cyclin Pas1/PHO80 domain containing 1(Cnppd1)
Cnpy2	0.950901	-0.0122305	0.901656	0.0507311	0.999979	-0.0388426	0.980529	0.00434998	0.799405	0.0460325	ENSRNOG00000003549	canopy FGF signaling regulator 2(Cnpy2)
Cnpy3	0.67199	-0.0891272	0.74712	0.116972	0.999979	-0.0341758	0.0911741	0.264666	0.0593874	0.305853	ENSRNOG00000016315	canopy FGF signaling regulator 3(Cnpy3)
Cnpy4	0.585332	0.122128	0.918069	-0.0761032	0.981181	0.289621	0.144928	0.34333	0.946569	0.0222885	ENSRNOG00000027175	canopy FGF signaling regulator 4(Cnpy4)
Cnrip1	0.05603	0.533284	0.828972	-0.122541	0.999979	0.130931	0.0414818	-0.442952	0.0148932	-0.552736	ENSRNOG00000005326	cannabinoid receptor interacting protein 1(Cnrip1)
Cnst	0.00195049	0.44657	0.0994393	0.256798	0.594753	0.43447	0.00287957	0.330225	0.569992	-0.0841677	ENSRNOG00000002710	consortin, connexin sorting protein(Cnst)
Cntf	0.596288	-0.386361	0.916467	-0.186603	0.999979	-0.0646156	0.902775	0.0880124	0.795649	0.193016	ENSRNOG00000012460	ciliary neurotrophic factor(Cntf)
Cntln	0.626753	-0.475048	0.920071	-0.214584	0.591223	-1.04604	0.515262	-0.493539	0.595261	0.415317	ENSRNOG00000043151	centlein(Cntln)
Cntrl	9.53303e-10	0.619618	0.752434	0.103123	0.999979	0.0540106	0.604055	0.0869063	0.863007	0.0332443	ENSRNOG00000022015	centriolin(Cntrl)
Cntrob	0.876261	-0.105235	0.541371	0.40945	0.999979	-0.258872	0.737679	0.148044	0.28157	0.424471	ENSRNOG00000008270	centrobin, centriole duplication and spindle assembly protein(Cntrob)
Coa3	5.60367e-05	-0.368381	0.0957425	-0.24299	0.999979	-0.0929687	0.0537147	-0.213291	0.505868	-0.0894975	ENSRNOG00000020487	cytochrome C oxidase assembly factor 3(Coa3)
Coa4	0.290151	-0.178312	0.591226	-0.144597	0.999979	-0.134186	0.877746	-0.0269656	0.520998	0.104346	ENSRNOG00000025385	cytochrome c oxidase assembly factor 4 homolog(Coa4)
Coa5	0.9035	-0.0279691	0.277406	-0.319792	0.999979	0.0776984	0.0133723	-0.459514	0.00323567	-0.56198	ENSRNOG00000018102	cytochrome C oxidase assembly factor 5(Coa5)
Coa7	0.00626225	-0.347113	0.830338	-0.0862041	0.999979	0.0487543	0.755942	0.0608552	0.947677	-0.0148214	ENSRNOG00000010636	cytochrome c oxidase assembly factor 7(Coa7)
Coa8	0.659831	-0.0872763	0.992795	-0.00693338	0.733253	0.2301	0.0945629	0.199321	0.858688	-0.0294696	ENSRNOG00000058920	apoptogenic 1, mitochondrial(Apopt1)
Coa8	0.948723	-0.0130576	0.825626	-0.0648196	0.999979	-0.0956296	0.92411	0.0141945	0.431148	0.105098	ENSRNOG00000011542	apoptogenic 1, mitochondrial(Apopt1)
Coasy	0.83661	0.0594275	0.452614	0.276943	0.999979	-0.231276	0.371254	0.205811	0.0650513	0.40199	ENSRNOG00000019918	Coenzyme A synthase(Coasy)
Cobll1	0.937579	0.0420265	0.326852	-0.902272	0.944798	-0.589742	0.813122	-0.175175	0.717185	0.269221	ENSRNOG00000027016	cordon-bleu WH2 repeat protein-like 1(Cobll1)
Cog1	0.00812921	0.283559	0.172412	0.251985	0.999979	0.119769	0.219974	-0.170005	0.035549	-0.286046	ENSRNOG00000002795	component of oligomeric golgi complex 1(Cog1)
Cog2	0.731168	-0.0576845	0.993716	0.00505786	0.785891	0.142848	0.914693	0.0141394	0.255003	-0.128729	ENSRNOG00000018228	component of oligomeric golgi complex 2(Cog2)
Cog3	0.0132536	0.361771	0.913122	0.0567619	0.999979	0.146434	0.00562708	0.425305	0.134186	0.262565	ENSRNOG00000000155	component of oligomeric golgi complex 3(Cog3)
Cog4	5.60367e-05	0.455477	0.513561	0.155155	0.999979	-0.00886455	0.00537059	0.336646	0.0100872	0.329494	ENSRNOG00000017745	component of oligomeric golgi complex 4(Cog4)
Cog5	0.800782	-0.0530191	0.902562	-0.051558	0.999979	0.0170255	0.806028	0.0432324	0.880562	0.0284055	ENSRNOG00000056610	component of oligomeric golgi complex 5(Cog5)
Cog6	0.719474	-0.0661448	0.996282	-0.00505233	0.999979	0.02644	0.111482	0.240784	0.180152	0.218694	ENSRNOG00000013660	component of oligomeric golgi complex 6(Cog6)
Cog7	0.630893	-0.0722773	0.813802	-0.0758802	0.999979	-0.0368029	0.157031	-0.186844	0.330751	-0.142566	ENSRNOG00000060008	component of oligomeric golgi complex 7(Cog7)
Cog8	0.687583	0.0603507	0.675928	-0.0903867	0.999979	-0.0577387	0.166539	-0.143596	0.486372	-0.0837698	ENSRNOG00000020379	component of oligomeric golgi complex 8(Cog8)
Coil	0.608261	-0.0925036	0.993716	0.00761039	0.999979	0.154817	0.838413	0.0400869	0.481438	-0.129511	ENSRNOG00000000244	coilin(Coil)
Col11a1	0.0537358	0.95088	0.942579	0.148893	0.43666	1.314	0.668447	-0.308746	0.022172	-1.42955	ENSRNOG00000023148	collagen type XI alpha 1 chain(Col11a1)
Col11a2	0.783052	0.219615	0.608877	0.501475	0.848994	-0.652692	0.329435	0.508815	0.0165713	1.13933	ENSRNOG00000000463	collagen type XI alpha 2 chain(Col11a2)
Col17a1	na	na	0.852314	0.418488	na	na	0.771053	-0.318569	0.954801	-0.0712965	ENSRNOG00000012110	collagen type XVII alpha 1 chain(Col17a1)
Col20a1	0.696655	0.358888	0.439413	0.677945	0.999979	0.257362	0.000405545	1.5918	0.00769211	1.30928	ENSRNOG00000010326	collagen type XX alpha 1 chain(Col20a1)
Col4a3	na	na	0.920379	-0.31875	0.999979	0.131031	2.74171e-05	3.13287	0.000110433	3.06071	ENSRNOG00000015365	collagen type IV alpha 3 chain(Col4a3)
Col8a2	0.390033	-0.700214	0.76364	-0.612501	0.564061	-1.68502	0.0358436	-1.93835	0.893183	-0.158856	ENSRNOG00000010841	collagen type VIII alpha 2 chain(Col8a2)
Colec11	na	1.4539	0.996282	-0.0264748	0.886781	-1.01651	0.76731	0.2839	0.160408	1.11506	ENSRNOG00000008373	collectin sub-family member 11(Colec11)
Colgalt1	0.928632	0.0189246	0.898738	0.0427249	0.999979	-0.106828	0.923245	-0.0138499	0.402585	0.106661	ENSRNOG00000023317	collagen beta(1-O)galactosyltransferase 1(Colgalt1)
Commd1	0.0022332	-0.351952	0.506069	-0.164253	0.999979	-0.00139156	0.000223212	-0.457336	0.00068658	-0.445244	ENSRNOG00000009281	copper metabolism domain containing 1(Commd1)
Commd10	3.59955e-05	-0.33746	0.0550612	-0.227426	0.999979	-0.0380012	0.0121805	-0.230159	0.0534296	-0.192504	ENSRNOG00000003958	COMM domain containing 10(Commd10)
Commd2	0.00211886	-0.287661	0.044812	-0.231304	0.999979	-0.134699	0.0042396	-0.25538	0.261266	-0.119026	ENSRNOG00000043386	COMM domain containing 2(Commd2)
Commd3	0.0239785	-0.235171	0.820378	-0.0672548	0.999979	0.116745	0.761141	-0.0447345	0.174851	-0.17289	ENSRNOG00000016383	COMM domain containing 3(Commd3)
Commd4	0.553693	-0.0913522	0.933251	-0.0374035	0.999979	-0.15292	0.0179619	-0.299506	0.423772	-0.123119	ENSRNOG00000018671	COMM domain containing 4(Commd4)
Commd5	0.904735	-0.031994	0.456524	0.177609	0.805829	0.246343	0.147282	0.199637	0.761097	-0.0556727	ENSRNOG00000004484	COMM domain-containing protein 5(LOC108348189)
Commd6	0.802081	-0.0476123	0.954783	-0.0299413	0.999979	-0.0829033	0.0310486	0.289976	0.00978641	0.357265	ENSRNOG00000038012	COMM domain containing 6(Commd6)
Commd7	0.221554	0.142281	0.317247	-0.211724	0.999979	-0.0838672	0.0088178	-0.335437	0.09179	-0.239043	ENSRNOG00000010538	COMM domain containing 7(Commd7)
Commd8	0.165027	-0.1372	0.522131	-0.135173	0.999979	0.0427873	0.140863	0.170341	0.359603	0.11931	ENSRNOG00000002320	COMM domain containing 8(Commd8)
Commd9	0.00126783	-0.323781	0.736092	-0.0805525	0.999833	-0.157436	0.119328	-0.166234	0.932508	-0.0124689	ENSRNOG00000004755	COMM domain containing 9(Commd9)
Comt	0.403078	0.20037	0.933596	0.0584563	0.999979	0.120037	0.769904	0.0758819	0.872738	-0.0452635	ENSRNOG00000001889	catechol-O-methyltransferase(Comt)
Comtd1	0.350753	-0.18767	0.47262	-0.235601	0.201418	-0.473548	0.00066108	-0.583137	0.625116	-0.111798	ENSRNOG00000013968	catechol-O-methyltransferase domain containing 1(Comtd1)
Cop1	0.107436	0.353566	0.911915	0.0919451	0.999979	-0.209007	0.262495	0.313305	0.0446964	0.544375	ENSRNOG00000042492	ring finger and WD repeat domain 2(Rfwd2)
Copa	0.0931046	0.155707	0.893958	0.0538124	0.641007	0.221951	0.945374	0.0119519	0.152986	-0.207411	ENSRNOG00000006247	coatomer protein complex subunit alpha(Copa)
Copb1	0.809469	-0.0284778	0.491028	-0.13629	0.999979	0.17668	0.811366	0.0336309	0.164116	-0.164938	ENSRNOG00000057623	coatomer protein complex, subunit beta 1(Copb1)
Cope	0.00122235	-0.291149	0.820772	-0.0780177	0.999979	-0.155653	0.557962	-0.0929027	0.565287	0.095598	ENSRNOG00000020178	coatomer protein complex, subunit epsilon(Cope)
Copg2	0.0262961	-0.237327	0.000896839	-0.499203	0.64549	-0.236396	0.000253123	-0.487191	0.0895949	-0.258196	ENSRNOG00000011014	coatomer protein complex, subunit gamma 2(Copg2)
Coprs	0.641036	-0.109188	0.525206	0.234196	0.999979	-0.0101889	0.746051	-0.0805079	0.955524	-0.0163805	ENSRNOG00000000111	coordinator of PRMT5 and differentiation stimulator(Coprs)
Cops2	0.0424297	-0.203309	0.696698	-0.0996911	0.999979	0.0673204	0.104788	-0.191924	0.0108456	-0.299569	ENSRNOG00000008744	COP9 signalosome subunit 2(Cops2)
Cops3	0.0141914	-0.245915	0.985672	0.0075402	0.999979	0.0385776	0.0457113	-0.149311	0.00871166	-0.200719	ENSRNOG00000053943	COP9 signalosome subunit 3(Cops3)
Cops4	0.0421234	-0.181888	0.640367	-0.0991093	0.999979	-0.0950193	0.146058	-0.152729	0.647733	-0.0590822	ENSRNOG00000023650	COP9 signalosome subunit 4(Cops4)
Cops5	7.17562e-05	-0.40381	0.72544	-0.0844593	0.999979	-0.083899	0.010298	-0.261415	0.110254	-0.181447	ENSRNOG00000006499	COP9 signalosome subunit 5(Cops5)
Cops6	0.935412	0.01477	0.673754	0.237056	0.999979	-0.108634	0.94465	0.0238861	0.69092	0.135192	ENSRNOG00000001346	COP9 signalosome subunit 6(Cops6)
Cops7a	0.996593	-0.000868143	0.0611371	0.237013	0.999979	0.118434	0.00164514	0.298399	0.0839113	0.185136	ENSRNOG00000016778	COP9 signalosome subunit 7A(Cops7a)
Cops7b	0.655688	-0.060601	0.676455	0.0795278	0.999979	-0.0481944	0.0456617	-0.174786	0.201752	-0.124999	ENSRNOG00000018723	COP9 signalosome subunit 7B(Cops7b)
Cops8	0.1086	-0.161235	0.89223	-0.035824	0.999979	0.0228821	0.711261	-0.0403575	0.549598	-0.064338	ENSRNOG00000019635	COP9 signalosome subunit 8(Cops8)
Cops9	4.23672e-05	-0.448429	0.400685	-0.205153	0.999979	-0.20321	0.143162	-0.218726	0.954187	-0.012317	ENSRNOG00000037402	COP9 signalosome subunit 9(Cops9)
Copz1	0.211325	-0.129256	0.797891	0.0645869	0.889379	0.18629	0.675048	-0.0521135	0.0236719	-0.235524	ENSRNOG00000036835	coatomer protein complex, subunit zeta 1(Copz1)
Coq10a	0.406002	0.322728	0.78362	0.189726	0.999979	-0.121219	0.787777	-0.0990144	0.985612	0.00851611	ENSRNOG00000029571	coenzyme Q10A(Coq10a)
Coq10b	0.506532	-0.0974042	0.730755	0.107578	0.980074	0.231121	0.041049	0.274009	0.770229	0.0538481	ENSRNOG00000014456	coenzyme Q10B(Coq10b)
Coq2	0.921865	-0.0357069	0.581957	-0.240185	0.999979	-0.213284	0.0694394	-0.401806	0.485586	-0.184939	ENSRNOG00000002194	coenzyme Q2, polyprenyltransferase(Coq2)
Coq3	2.32938e-05	-0.489399	0.159637	-0.23417	0.999979	-0.216179	0.00191312	-0.348862	0.273968	-0.147515	ENSRNOG00000009974	coenzyme Q3 methyltransferase(Coq3)
Coq4	0.0758329	-0.570216	0.795135	-0.292402	0.999979	0.274128	0.744481	-0.18624	0.291864	-0.548686	ENSRNOG00000026691	coenzyme Q4(Coq4)
Coq5	0.00013753	-0.414217	0.887686	-0.0499393	0.999979	-0.0740462	0.32945	-0.125932	0.78438	-0.0439426	ENSRNOG00000001171	coenzyme Q5, methyltransferase(Coq5)
Coq6	0.39508	-0.121365	0.921284	-0.0428657	0.286235	-0.27819	0.987297	-0.00295672	0.0478272	0.269909	ENSRNOG00000011164	coenzyme Q6 monooxygenase(Coq6)
Coq7	0.000297974	-0.555521	0.778501	-0.135172	0.999979	-0.113694	0.00559087	-0.527048	0.0524709	-0.406066	ENSRNOG00000017012	coenzyme Q7, hydroxylase(Coq7)
Coq8a	1.02982e-06	0.785902	0.65252	0.212416	0.999979	0.329624	0.834801	0.0603728	0.424694	-0.21102	ENSRNOG00000043201	coenzyme Q8A(Coq8a)
Coq8b	0.457191	-0.148224	0.723041	-0.115103	0.999979	-0.127947	0.824374	-0.0409055	0.559504	0.101623	ENSRNOG00000020848	coenzyme Q8B(Coq8b)
Coq9	0.470693	-0.139063	0.577277	0.130457	0.620934	0.232411	0.740227	0.0493307	0.161326	-0.183418	ENSRNOG00000016190	coenzyme Q9(Coq9)
Coro1a	0.0055325	-0.235473	0.275014	-0.157783	0.615827	-0.225311	3.84769e-14	-0.623661	1.74231e-05	-0.387554	ENSRNOG00000019430	coronin 1A(Coro1a)
Coro1b	0.736874	0.0548816	0.175447	0.209335	0.445405	0.271099	0.0390359	-0.223105	3.57462e-06	-0.481019	ENSRNOG00000021828	coronin 1B(Coro1b)
Coro1c	0.00181404	-0.427097	0.0104946	-0.342663	0.945698	-0.368654	6.61374e-34	-1.25698	1.18479e-15	-0.877564	ENSRNOG00000000697	coronin 1C(Coro1c)
Coro2a	0.015322	0.676553	0.41754	-0.509333	0.988424	-0.501738	0.0667872	-0.673478	0.765471	-0.145745	ENSRNOG00000008901	coronin 2A(Coro2a)
Coro2b	0.852555	-0.123018	0.927651	-0.122329	0.999979	-0.519612	0.000365808	-1.41931	0.0678111	-0.791107	ENSRNOG00000015257	coronin 2B(Coro2b)
Coro7	0.0078894	0.402231	0.724185	0.183301	0.999979	-0.0748789	0.055931	-0.438168	0.238775	-0.302898	ENSRNOG00000004146	coronin 7(Coro7)
Cotl1	0.00855281	-0.347645	0.252272	-0.299648	0.825304	-0.415695	1.10806e-21	-1.43149	8.12562e-10	-0.986993	ENSRNOG00000016257	coactosin-like F-actin binding protein 1(Cotl1)
Cox10	0.197433	-0.177728	0.602642	-0.160569	0.999979	0.0108911	0.660202	-0.0814923	0.57543	-0.105525	ENSRNOG00000024972	COX10 heme A:farnesyltransferase cytochrome c oxidase assembly factor(Cox10)
Cox11	0.00925148	0.405658	0.992795	0.00725056	0.93572	-0.260343	0.909961	-0.019503	0.081152	0.237822	ENSRNOG00000052096	cytochrome c oxidase assembly protein COX11, mitochondrial(LOC103693419)
Cox14	0.150606	-0.318882	0.443398	-0.22284	0.999979	0.0908549	0.943979	0.0148985	0.773281	-0.0645005	ENSRNOG00000061425	cytochrome c oxidase assembly protein 14(Cox14)
Cox15	0.304579	0.118008	0.986212	0.015664	0.999979	0.171349	0.769814	0.0595363	0.486771	-0.13315	ENSRNOG00000017230	COX15 cytochrome c oxidase assembly homolog(Cox15)
Cox16	0.039701	-0.214148	0.469608	-0.223753	0.999979	-0.0637466	0.675898	0.0881347	0.3915	0.17251	ENSRNOG00000047115	COX16, cytochrome c oxidase assembly homolog(Cox16)
Cox17	0.0102893	-0.275508	0.845053	-0.0651232	0.999979	-0.173306	0.0731256	-0.224157	0.837358	-0.0355584	ENSRNOG00000038951	COX17 cytochrome c oxidase copper chaperone(Cox17)
Cox18	0.897606	0.0282066	0.871607	0.0641442	0.999979	-0.0579034	0.16694	0.199494	0.0914453	0.248963	ENSRNOG00000003052	COX18, cytochrome c oxidase assembly factor(Cox18)
Cox19	0.641235	-0.0799338	0.440353	-0.200694	0.931902	-0.187645	0.984337	-0.00405878	0.298651	0.174286	ENSRNOG00000050052	COX19 cytochrome c oxidase assembly factor(Cox19)
Cox20	0.691251	-0.0804907	0.497989	-0.179353	0.999979	-0.0660996	0.769624	-0.0537539	0.886646	0.0283668	ENSRNOG00000004553	COX20 cytochrome C oxidase assembly factor(Cox20)
Cox4i1	0.112849	-0.1603	0.902145	0.0383825	0.999979	-0.0481721	0.228288	-0.129374	0.472661	-0.0873175	ENSRNOG00000017817	cytochrome c oxidase subunit 4i1(Cox4i1)
Cox4i2	0.439127	-0.438573	0.128783	-1.09503	0.495611	-0.973333	0.000133065	-1.99351	0.0479435	-1.09364	ENSRNOG00000007827	cytochrome c oxidase subunit 4i2(Cox4i2)
Cox5a	1.84571e-08	-0.509401	0.662501	-0.138175	0.999979	-0.162955	8.178e-05	-0.538776	0.0163757	-0.36388	ENSRNOG00000018816	cytochrome c oxidase subunit 5A(Cox5a)
Cox5b	1.58416e-06	-0.406377	0.336041	-0.145362	0.999979	-0.131878	0.000500064	-0.304828	0.0919707	-0.168544	ENSRNOG00000016660	cytochrome c oxidase subunit 5B(Cox5b)
Cox6a1	4.0693e-08	-0.43777	0.491028	-0.139933	0.999979	-0.1629	0.0145937	-0.262939	0.543965	-0.0828317	ENSRNOG00000001170	cytochrome c oxidase subunit 6A1(Cox6a1)
Cox6b1	0.157263	-0.396605	0.826995	-0.125738	0.999979	-0.0467784	0.205306	-0.295696	0.32911	-0.252536	ENSRNOG00000034161	-
Cox6b1	0.0018894	-0.321545	0.229816	-0.193668	0.999979	-0.166224	0.00353123	-0.300206	0.368894	-0.113317	ENSRNOG00000024309	similar to cytochrome c oxidase, subunit VIb polypeptide 1(LOC688869)
Cox6c	0.000378537	-0.36042	0.548417	-0.128263	0.999979	0.0111955	0.123779	-0.174667	0.113036	-0.188611	ENSRNOG00000010807	cytochrome c oxidase subunit 6C(Cox6c)
Cox7a1	na	na	0.977363	0.106711	0.999979	-0.0515865	0.506945	0.586906	0.451799	0.691359	ENSRNOG00000050015	similar to Cytochrome c oxidase polypeptide VIIa-heart, mitochondrial precursor (Cytochrome c oxidase subunit VIIa-H) (COX VIIa-M)(LOC687508)
Cox7a2l	0.000206218	0.326011	0.873611	-0.0384361	0.999979	0.0967509	0.106498	0.138909	0.699426	0.0424057	ENSRNOG00000004526	cytochrome c oxidase subunit 7A2 like(Cox7a2l)
Cox7a2l2	0.000431765	-0.356642	0.318251	-0.17742	0.999979	-0.0527448	0.722182	-0.049782	0.892389	0.0212254	ENSRNOG00000042903	cytochrome c oxidase subunit VIIa polypeptide 2(Cox7a2)
Cox7b	6.83086e-07	-0.464102	0.608027	-0.144364	0.999979	-0.0780314	0.238973	-0.172667	0.70978	-0.0672326	ENSRNOG00000054689	cytochrome c oxidase subunit 7B(Cox7b)
Cox7c	2.00102e-12	-0.558293	0.0385677	-0.274583	0.999979	0.00220844	0.00531613	-0.291534	0.00771694	-0.29426	ENSRNOG00000030237	cytochrome c oxidase subunit 7C(Cox7c)
Cox8a	0.00333844	-0.304914	0.712468	-0.104161	0.999979	-0.136112	0.0402361	-0.255156	0.456786	-0.11207	ENSRNOG00000021177	cytochrome c oxidase subunit 8A(Cox8a)
Cp	na	na	0.845078	0.720432	0.999979	-1.29	0.627494	0.797799	0.936807	0.156733	ENSRNOG00000011913	ceruloplasmin(Cp)
Cpa2	0.296001	-0.452999	0.845593	-0.277627	0.445405	-0.870231	0.0413427	-1.09382	0.676573	-0.28585	ENSRNOG00000028092	carboxypeptidase A2(Cpa2)
Cpd	5.94199e-06	0.714368	0.561905	0.262954	0.999979	-0.180411	0.145985	0.349307	0.0346076	0.506803	ENSRNOG00000003873	carboxypeptidase D(Cpd)
Cpe	0.548787	0.408624	0.72715	-0.576897	0.762547	-1.15886	0.00432973	-2.06681	0.23612	-0.971096	ENSRNOG00000043387	carboxypeptidase E(Cpe)
Cpeb4	na	na	0.829269	0.319034	0.830521	0.726984	0.00643543	1.3732	0.258755	0.70022	ENSRNOG00000033169	cytoplasmic polyadenylation element binding protein 4(Cpeb4)
Cplane1	0.962955	-0.0437986	0.622183	0.451575	0.996137	-0.409789	0.199658	0.587801	0.0349035	0.940389	ENSRNOG00000042118	similar to hypothetical protein FLJ13231(RGD1310081)
Cplane2	0.984234	-0.0118226	0.846297	-0.228963	0.912967	-0.442449	0.345194	-0.45762	0.912869	-0.0679703	ENSRNOG00000023346	REM2 and RAB-like small GTPase 1(Rsg1)
Cpne1	0.429132	-1.77392	0.965007	0.447276	0.999979	0.0505348	0.635657	-1.41873	0.875503	-0.537553	ENSRNOG00000050864	copine 1(Cpne1)
Cpne2	0.377213	0.498261	0.269017	-1.05952	0.897743	-0.784906	0.000598922	-2.11854	0.047805	-1.31262	ENSRNOG00000043286	copine 2(Cpne2)
Cpne3	0.955314	-0.0167906	0.98336	0.019073	0.848353	0.251665	0.173884	-0.257642	0.00639012	-0.502821	ENSRNOG00000006298	copine 3(Cpne3)
Cpne7	0.196469	0.808459	0.322308	-0.984151	0.422104	-1.44131	0.113454	-1.00098	0.851966	0.154474	ENSRNOG00000015397	copine 7(Cpne7)
Cpox	0.592781	-0.139271	0.444313	0.242949	0.999979	-0.0923357	0.228911	-0.233462	0.735571	-0.0821611	ENSRNOG00000001654	coproporphyrinogen oxidase(Cpox)
Cpped1	0.36727	-0.365546	0.465026	-0.638695	0.999979	0.332897	0.0318181	-1.04128	0.00479123	-1.42267	ENSRNOG00000015118	calcineurin-like phosphoesterase domain containing 1(Cpped1)
Cpsf1	0.9035	0.0273486	0.758756	0.148414	0.999979	0.172605	0.461888	-0.171742	0.256307	-0.263744	ENSRNOG00000030705	cleavage and polyadenylation specific factor 1(Cpsf1)
Cpsf2	0.220892	-0.134896	0.997411	-0.00351219	0.999979	0.139162	0.73197	-0.0596025	0.133337	-0.225236	ENSRNOG00000005733	cleavage and polyadenylation specific factor 2(Cpsf2)
Cpsf3	0.172527	-0.149538	0.955571	-0.0295921	0.999979	0.0556067	0.383094	-0.13503	0.221488	-0.190142	ENSRNOG00000052418	cleavage and polyadenylation specific factor 3(Cpsf3)
Cpsf4	0.310876	-0.123109	0.994121	0.00535082	0.994235	-0.122347	0.000140305	-0.431372	0.011512	-0.314255	ENSRNOG00000000985	cleavage and polyadenylation specific factor 4(Cpsf4)
Cpsf6	0.929794	0.0109745	0.976264	-0.0166852	0.935343	0.15253	0.823817	0.034665	0.414535	-0.11485	ENSRNOG00000005927	cleavage and polyadenylation specific factor 6(Cpsf6)
Cpsf7	0.980699	0.00457779	0.724185	0.0935482	0.999979	0.0179425	0.0449204	0.231507	0.0792896	0.216198	ENSRNOG00000020668	cleavage and polyadenylation specific factor 7(Cpsf7)
Cpt1a	0.00832226	0.428038	0.0738327	0.364556	0.566748	0.371847	0.0553218	0.304102	0.864083	-0.0380457	ENSRNOG00000014254	carnitine palmitoyltransferase 1A(Cpt1a)
Cpt1b	0.58908	-0.415293	0.733857	0.397171	0.999979	-0.221904	0.717696	0.230443	0.582634	0.349237	ENSRNOG00000010438	carnitine palmitoyltransferase 1B(Cpt1b)
Cpt2	0.0667772	-0.282561	0.364798	-0.221253	0.999979	0.230527	0.00221541	-0.429163	2.09572e-06	-0.676393	ENSRNOG00000012443	carnitine palmitoyltransferase 2(Cpt2)
Cptp	0.931038	0.0206834	0.990665	0.00901637	0.985613	-0.108534	0.705262	-0.0581582	0.765165	0.0497521	ENSRNOG00000022455	ceramide-1-phosphate transfer protein(Cptp)
Cpxm1	0.27779	-0.3585	0.948657	-0.112126	0.999979	-0.148356	0.805342	-0.15044	0.689385	-0.245234	ENSRNOG00000021220	carboxypeptidase X (M14 family), member 1(Cpxm1)
Cr1l	9.36353e-09	0.489563	0.979702	-0.0129222	0.999979	0.151108	0.0444532	0.216222	0.595009	0.0720765	ENSRNOG00000008193	complement C3b/C4b receptor 1 like(Cr1l)
Crabp2	0.672327	0.278168	0.973248	-0.061958	0.999979	0.162068	0.570666	0.264301	0.610244	0.253442	ENSRNOG00000022101	cellular retinoic acid binding protein 2(Crabp2)
Cracd	na	na	0.578604	-0.959262	0.799252	1.22297	0.827471	-0.238278	0.183961	-1.29721	ENSRNOG00000002139	hypothetical LOC289568(RGD1311575)
Cradd	0.240844	0.349204	0.96426	0.0500571	0.999979	-0.102485	0.677049	0.139046	0.294129	0.324869	ENSRNOG00000008507	CASP2 and RIPK1 domain containing adaptor with death domain(Cradd)
Cramp1	0.881559	0.0682831	0.0912255	0.567123	0.999979	0.341728	0.0797016	0.453332	0.589178	0.175976	ENSRNOG00000024635	cramped chromatin regulator homolog 1(Cramp1)
Crat	0.0180551	0.796608	0.774519	0.19689	0.999979	-0.266865	0.355856	0.287164	0.0862668	0.510415	ENSRNOG00000018145	carnitine O-acetyltransferase(Crat)
Crb3	9.34297e-05	0.430249	0.573689	0.134342	0.999979	-0.126415	0.141886	-0.184514	0.733915	-0.0548151	ENSRNOG00000047322	crumbs 3, cell polarity complex component(Crb3)
Crbn	0.000660211	0.361415	0.819	0.0731894	0.597967	0.363953	2.85457e-06	0.527544	0.195088	0.178829	ENSRNOG00000006534	cereblon(Crbn)
Crcp	0.0183688	-0.302834	0.282345	-0.180726	0.999979	-0.0215254	0.679474	-0.0552777	0.844336	-0.0299052	ENSRNOG00000000901	CGRP receptor component(Crcp)
Creb1	0.355429	-0.167131	0.41627	-0.231103	0.936759	0.147294	0.122596	0.258566	0.587342	0.11127	ENSRNOG00000013412	cAMP responsive element binding protein 1(Creb1)
Creb3	0.9035	0.0227314	0.605651	0.155105	0.999979	0.105932	0.00117829	0.447683	0.021388	0.346798	ENSRNOG00000016452	cAMP responsive element binding protein 3(Creb3)
Creb3l2	0.856792	0.180432	0.954783	-0.132783	0.999979	0.0509919	0.854917	0.140909	0.985702	-0.0171124	ENSRNOG00000012826	cAMP responsive element binding protein 3-like 2(Creb3l2)
Creb3l4	0.581638	0.395734	0.988592	-0.0373609	0.999979	-0.0263899	0.992795	0.00528253	0.923687	0.0545297	ENSRNOG00000023493	cAMP responsive element binding protein 3-like 4(Creb3l4)
Crebbp	0.000760316	0.327346	0.595595	0.163556	0.999979	0.177058	2.19153e-07	0.71057	0.000315471	0.536014	ENSRNOG00000005330	CREB binding protein(Crebbp)
Crebl2	0.536374	0.838955	0.544835	-0.953653	0.999979	-0.306379	0.601144	0.493279	0.312325	0.892864	ENSRNOG00000007115	cAMP responsive element binding protein-like 2(Crebl2)
Crebrf	1.79333e-13	1.01877	0.00552624	0.493502	0.999979	0.427126	3.30982e-20	1.27139	4.43973e-09	0.874893	ENSRNOG00000020769	CREB3 regulatory factor(Crebrf)
Crebzf	0.00190974	0.931355	0.938011	0.0790631	0.999979	-0.589516	0.264465	-0.354753	0.812182	0.0955639	ENSRNOG00000018987	CREB/ATF bZIP transcription factor(Crebzf)
Creg1	0.271082	-0.311759	0.399016	-0.351361	0.999979	-0.23222	0.564567	-0.165955	0.979543	0.00993585	ENSRNOG00000003291	cellular repressor of E1A-stimulated genes 1(Creg1)
Creld1	0.431586	0.24711	0.421639	0.266819	0.999979	0.103874	0.00106784	0.57867	0.0147769	0.47188	ENSRNOG00000009414	cysteine-rich with EGF-like domains 1(Creld1)
Creld2	0.142679	-0.231417	0.692385	0.144272	0.999979	0.375732	0.0107169	0.406349	0.79772	0.0583668	ENSRNOG00000004659	cysteine-rich with EGF-like domains 2(Creld2)
Crem	0.833246	0.0385054	0.999876	8.29799e-05	0.999979	-0.00387483	0.0499679	0.280573	0.0522145	0.293222	ENSRNOG00000014900	cAMP responsive element modulator(Crem)
Crip1	2.67323e-09	-0.570621	0.00624215	-0.831531	0.00821519	-0.874749	0.000288173	-0.930139	0.806641	-0.0926177	ENSRNOG00000027990	cysteine rich protein 1(Crip1)
Crip2	0.0610763	-0.90863	0.108268	-1.00537	0.824181	-0.902258	0.580219	-0.296067	0.370413	0.460593	ENSRNOG00000005041	cysteine-rich protein 2(Crip2)
Cript	0.030145	0.189653	0.512871	-0.153135	0.999979	0.0656176	0.38789	0.120185	0.69078	0.0647976	ENSRNOG00000015215	CXXC repeat containing interactor of PDZ3 domain(Cript)
Crispld2	0.884323	-0.134567	0.330028	-1.27102	0.374031	-1.5498	0.0098878	-2.13678	0.472508	-0.684324	ENSRNOG00000016752	cysteine-rich secretory protein LCCL domain containing 2(Crispld2)
Crk	0.0394113	0.691574	0.979388	0.0372379	0.999979	-0.244088	0.717311	0.138223	0.35971	0.323959	ENSRNOG00000025792	CRK proto-oncogene, adaptor protein(Crk)
Crlf2	0.473238	0.184028	0.439413	0.24866	0.999979	0.177822	0.447013	-0.159742	0.179053	-0.276794	ENSRNOG00000049828	cytokine receptor-like factor 2(Crlf2)
Crlf3	2.39592e-30	1.03654	0.98336	0.0134277	0.999979	-0.0454294	0.20693	-0.169544	0.477305	-0.109028	ENSRNOG00000050657	-
Crls1	0.485789	0.249145	0.864661	0.160325	0.804617	-0.592124	0.739917	-0.140704	0.160402	0.509738	ENSRNOG00000021273	cardiolipin synthase 1(Crls1)
Crmp1	0.476802	0.23555	0.688246	-0.450999	0.999979	-0.173694	0.273778	-0.604148	0.365746	-0.540409	ENSRNOG00000004781	collapsin response mediator protein 1(Crmp1)
Crnkl1	0.903064	0.0185531	0.805837	-0.0731126	0.999979	0.180192	0.785077	-0.0414657	0.062773	-0.231719	ENSRNOG00000010587	crooked neck-like protein 1-like(LOC102548514)
Crnkl1	0.741404	0.0772468	0.99487	0.00619091	0.999979	0.105136	0.914693	0.0212849	0.608623	-0.0974588	ENSRNOG00000040045	crooked neck pre-mRNA splicing factor 1(Crnkl1)
Crocc	0.852264	-0.176252	0.72544	0.482308	0.999979	-0.454889	0.360015	0.602092	0.128794	0.97071	ENSRNOG00000008334	ciliary rootlet coiled-coil, rootletin(Crocc)
Crot	0.3327	0.149134	0.426766	-0.194655	0.999979	-0.0652653	0.00175837	-0.418493	0.0191499	-0.34016	ENSRNOG00000006779	carnitine O-octanoyltransferase(Crot)
Crppa	0.990141	-0.0151338	0.996282	0.0180554	0.999979	-0.0584611	0.346086	-0.639018	0.489146	-0.516763	ENSRNOG00000006199	isoprenoid synthase domain containing(Ispd)
Crtam	0.950002	-0.0429493	0.0519326	-1.43217	0.802481	-0.894893	7.01824e-05	-2.2639	0.00512611	-1.68394	ENSRNOG00000008153	cytotoxic and regulatory T cell molecule(Crtam)
Crtapl1	0.25208	-0.25905	0.344701	-0.339178	0.591223	-0.456273	6.88198e-08	-1.09694	0.00456033	-0.638644	ENSRNOG00000009878	cartilage associated protein(Crtap)
Crtc1	0.916446	0.0503716	0.533029	0.439556	0.999979	-0.385468	0.601021	0.232037	0.199528	0.522147	ENSRNOG00000022421	CREB regulated transcription coactivator 1(Crtc1)
Crtc2	0.177939	0.24837	0.910046	0.082269	0.999979	-0.245555	0.965877	0.0131064	0.297155	0.272916	ENSRNOG00000056337	CREB regulated transcription coactivator 2(Crtc2)
Crtc3	0.0012878	1.19707	0.957803	0.0715924	0.999979	0.00395702	0.883492	-0.0670421	0.934232	-0.0405346	ENSRNOG00000011975	CREB regulated transcription coactivator 3(Crtc3)
Cry1	0.00027902	0.478717	0.732311	0.104817	0.999979	-0.0386851	0.935834	-0.0142288	0.814702	0.0432273	ENSRNOG00000006622	cryptochrome circadian clock 1(Cry1)
Cry2	0.0186248	0.396482	0.470379	0.306444	0.999979	0.303709	0.0616849	0.439182	0.509328	0.18873	ENSRNOG00000007478	cryptochrome circadian clock 2(Cry2)
Cryga	0.193036	-0.888686	0.222675	-1.34838	0.999979	-0.202051	0.00697087	-2.0391	0.0170343	-1.92736	ENSRNOG00000014790	crystallin, gamma A(Cryga)
Cryl1	0.860505	0.170051	0.799783	-0.460888	0.0626955	-1.85806	0.147196	-1.12077	0.508864	0.564035	ENSRNOG00000008989	crystallin, lambda 1(Cryl1)
Cryz	0.00189703	-0.721152	0.728115	-0.316419	0.999979	0.256734	0.0367482	-0.828838	0.0050205	-1.14474	ENSRNOG00000028319	crystallin zeta(Cryz)
Cryzl1	0.00339877	-0.348366	0.89043	-0.0616876	0.999979	0.0222542	0.653721	-0.0814315	0.516932	-0.117838	ENSRNOG00000028014	crystallin zeta like 1(Cryzl1)
Cs	0.227009	-0.138161	0.799276	0.0761631	0.999979	0.0458968	0.0833636	-0.211065	0.0511223	-0.246179	ENSRNOG00000023520	citrate synthase(Cs)
Csad	0.922569	0.035964	0.664703	0.243795	0.999979	-0.0749558	0.283625	-0.307892	0.54194	-0.198939	ENSRNOG00000011573	cysteine sulfinic acid decarboxylase(Csad)
Csdc2	0.994454	0.00661917	0.252858	-0.932277	0.217723	-1.38633	0.135061	-0.814142	0.675196	0.273206	ENSRNOG00000005332	cold shock domain containing C2(Csdc2)
Csde1	0.999592	-5.97876e-05	0.362831	-0.187323	0.999979	0.213816	0.280842	-0.14609	0.00277494	-0.372325	ENSRNOG00000061058	cold shock domain containing E1, RNA binding(Csde1)
Cse1l	0.969624	-0.00527056	0.914138	0.0496547	0.999979	0.154407	0.00721079	-0.373604	0.000135045	-0.535679	ENSRNOG00000007665	chromosome segregation 1 like(Cse1l)
Csf1	0.672341	-0.326725	0.0768269	1.62504	0.109008	2.12609	0.00124446	2.15756	0.780671	-0.286333	ENSRNOG00000018659	colony stimulating factor 1(Csf1)
Csf2	0.458492	0.581264	0.00413181	-2.59052	0.000453253	-4.3815	2.78971e-07	-4.58724	0.300438	-0.887742	ENSRNOG00000026805	colony stimulating factor 2(Csf2)
Csf2ra	na	-0.320499	0.815181	0.558503	0.445693	-1.53132	0.705103	-0.457638	0.494436	0.770877	ENSRNOG00000049782	colony stimulating factor 2 receptor alpha subunit(Csf2ra)
Csgalnact2	0.000462634	0.4388	0.695847	-0.129384	0.989509	0.281425	0.00604196	0.38814	0.522118	0.116397	ENSRNOG00000014713	chondroitin sulfate N-acetylgalactosaminyltransferase 2(Csgalnact2)
Csk	0.0525043	-0.240201	0.578255	-0.13252	0.869315	-0.32084	4.25563e-12	-0.735631	0.00125794	-0.383078	ENSRNOG00000019374	c-src tyrosine kinase(Csk)
Csnk1a1	0.65281	0.0544303	0.647989	-0.0936932	0.894505	0.141962	0.735503	0.0415617	0.382694	-0.0994526	ENSRNOG00000017106	casein kinase 1, alpha 1(Csnk1a1)
Csnk1d	0.00245823	0.268108	0.601774	0.0831055	0.999979	-0.0580185	0.736788	0.0333348	0.295682	0.0935235	ENSRNOG00000036676	casein kinase 1, delta(Csnk1d)
Csnk1e	0.0822724	0.42906	0.893064	0.1129	0.314015	-0.535829	0.428378	-0.248523	0.412355	0.267298	ENSRNOG00000013076	casein kinase 1, epsilon(Csnk1e)
Csnk1g1	0.235044	0.315915	0.642211	0.224178	0.999979	-0.0456368	0.102202	0.380324	0.144501	0.363046	ENSRNOG00000016620	casein kinase 1, gamma 1(Csnk1g1)
Csnk1g2	0.0105527	0.369256	0.992795	-0.00884579	0.997128	-0.259246	0.0158537	-0.383931	0.48144	-0.138761	ENSRNOG00000018529	casein kinase 1, gamma 2(Csnk1g2)
Csnk1g3	0.0261715	0.477912	0.692862	0.19794	0.999979	0.0733934	0.00362901	0.620084	0.0367543	0.488774	ENSRNOG00000016677	casein kinase 1, gamma 3(Csnk1g3)
Csnk2a1	0.692611	0.0618082	0.721067	0.100949	0.999979	0.00235555	0.427154	0.111209	0.434182	0.115717	ENSRNOG00000005276	casein kinase 2 alpha 1(Csnk2a1)
Csnk2a2	0.565652	-0.204593	0.806132	0.137097	0.999979	-0.156563	0.871513	-0.0470999	0.678171	0.118563	ENSRNOG00000011933	casein kinase 2 alpha 2(Csnk2a2)
Csnk2b	0.0192943	-0.285916	0.66637	0.111814	0.999979	-0.0181537	0.715154	0.0551359	0.700788	0.0605108	ENSRNOG00000000847	casein kinase 2 beta(Csnk2b)
Cspp1	0.0108866	0.412482	0.682695	0.157583	0.999979	0.100506	0.0373682	0.36212	0.128533	0.290651	ENSRNOG00000021718	centrosome and spindle pole associated protein 1(Cspp1)
Csrnp1	9.35418e-05	0.557887	0.361778	0.422825	0.994235	0.414151	0.28173	0.32815	0.988682	-0.00611688	ENSRNOG00000033433	cysteine and serine rich nuclear protein 1(Csrnp1)
Csrnp2	0.696133	-0.127833	0.974097	0.0655505	0.999979	0.165056	0.802044	0.142182	0.929339	-0.0546062	ENSRNOG00000019653	cysteine and serine rich nuclear protein 2(Csrnp2)
Csrp1	0.239652	-0.208009	0.907961	0.0704114	0.999979	-0.158913	0.00582354	-0.511653	0.0826537	-0.35637	ENSRNOG00000008937	cysteine and glycine-rich protein 1(Csrp1)
Csrp2	na	na	0.725138	0.505248	0.90272	-0.764438	0.374859	-0.664203	0.927497	0.0830795	ENSRNOG00000003772	cysteine and glycine-rich protein 2(Csrp2)
Cst3	0.0606145	-0.271511	0.808779	-0.0932407	0.797988	-0.246225	0.231069	-0.193771	0.812182	0.0496914	ENSRNOG00000005195	cystatin C(Cst3)
Cst6	na	na	0.345757	-2.09139	0.875313	-1.49002	0.455964	-1.04899	0.831508	0.343394	ENSRNOG00000020455	cystatin E/M(Cst6)
Cst7	0.0270564	-0.636811	3.5011e-05	-1.94519	0.0253677	-1.88804	1.34899e-07	-2.26806	0.407116	-0.447642	ENSRNOG00000006767	cystatin F(Cst7)
Cstb	0.948723	0.0100747	0.73428	-0.0891197	0.999979	-0.110645	0.802044	-0.0372561	0.544595	0.0851414	ENSRNOG00000001201	cystatin B(Cstb)
Cstf1	0.659764	-0.0567637	0.992795	0.00577586	0.999979	-0.0522881	0.79254	-0.0350065	0.906915	0.0170635	ENSRNOG00000004775	cleavage stimulation factor subunit 1(Cstf1)
Cstf2	0.0119891	-0.265448	0.255093	-0.200085	0.825747	-0.294597	9.30435e-07	-0.515397	0.076809	-0.217377	ENSRNOG00000048025	cleavage stimulation factor subunit 2(Cstf2)
Cstf2t	0.898695	-0.046343	0.97792	-0.0307308	0.999979	-0.194818	0.00630466	-0.621094	0.0866106	-0.430573	ENSRNOG00000050289	cleavage stimulation factor subunit 2, tau variant(Cstf2t)
Cstf3	0.580226	-0.106797	0.98919	-0.013333	0.999979	0.00871233	0.243441	-0.202677	0.253576	-0.211159	ENSRNOG00000012089	-
Ctbp1	0.150606	0.226849	0.736598	0.165794	0.999979	-0.24553	0.261212	-0.259133	0.769812	-0.0850569	ENSRNOG00000005428	C-terminal binding protein 1(Ctbp1)
Ctbp2	0.692165	0.375796	0.916274	0.179305	0.999979	0.474898	0.421115	0.466315	0.905013	0.0896713	ENSRNOG00000017326	C-terminal binding protein 2(Ctbp2)
Ctbs	0.505157	-0.194897	0.560506	-0.238796	0.994172	0.202725	0.0252412	-0.461811	0.00131392	-0.683074	ENSRNOG00000015573	chitobiase(Ctbs)
Ctc1	0.397263	0.139445	0.749216	0.102262	0.999979	0.0345547	0.101904	-0.228962	0.117004	-0.232124	ENSRNOG00000005357	CTS telomere maintenance complex component 1(Ctc1)
Ctcf	0.0105647	0.270375	0.994357	-0.00619282	0.999979	-0.112196	0.802044	0.0477594	0.300265	0.173354	ENSRNOG00000017674	CCCTC-binding factor(Ctcf)
Ctdnep1	0.737103	-0.0762989	0.653898	-0.171657	0.781805	-0.269529	0.131326	-0.279533	0.936983	-0.0202102	ENSRNOG00000017352	CTD nuclear envelope phosphatase 1(Ctdnep1)
Ctdp1	0.00289553	0.350202	0.809526	0.0931844	0.999979	-0.200755	0.640458	-0.0865057	0.45325	0.136981	ENSRNOG00000061474	CTD phosphatase subunit 1(Ctdp1)
Ctdsp1	0.032455	0.353024	0.927651	-0.0607325	0.888784	-0.390561	0.124939	-0.311032	0.728647	0.0903638	ENSRNOG00000015295	CTD small phosphatase 1(Ctdsp1)
Ctdsp2	0.0627538	1.23569	0.234381	0.768776	0.875217	0.860919	0.285537	0.501485	0.565287	-0.326242	ENSRNOG00000047598	-
Ctdspl	na	na	0.993793	0.034419	0.999979	-0.533559	0.114523	-1.38081	0.340473	-0.907398	ENSRNOG00000046257	CTD small phosphatase like(Ctdspl)
Ctdspl2	0.0647983	0.198514	0.44135	-0.150074	0.999979	0.174141	0.116208	0.17876	0.860274	0.0271417	ENSRNOG00000022141	CTD small phosphatase like 2(Ctdspl2)
Ctf1	na	0.437617	0.301617	1.0226	0.366688	1.48248	0.653957	-0.364298	0.0139569	-1.94228	ENSRNOG00000018962	cardiotrophin 1(Ctf1)
Ctla2a	2.05701e-08	1.11536	0.720028	-0.131594	0.999979	-0.260499	0.157456	0.231796	0.00202091	0.479538	ENSRNOG00000039971	cytotoxic T lymphocyte-associated protein 2 alpha(Ctla2a)
Ctla4	0.318735	-0.148691	0.000585133	0.74037	4.9105e-06	1.10345	1.06914e-11	1.24286	0.567733	0.147871	ENSRNOG00000054129	cytotoxic T-lymphocyte-associated protein 4(Ctla4)
Ctnna1	0.280727	-0.274933	0.921284	-0.214088	0.999979	-0.0217915	0.566222	-0.448139	0.368507	-0.693805	ENSRNOG00000005796	catenin alpha 1(Ctnna1)
Ctnnal1	0.0460659	0.48751	0.972813	0.0321924	0.999979	-0.0512122	0.953985	-0.0154723	0.977927	0.0091987	ENSRNOG00000010593	catenin alpha-like 1(Ctnnal1)
Ctnnb1	0.226099	0.24864	0.926451	0.0407333	0.924547	-0.26412	0.153124	-0.193604	0.695623	0.0661053	ENSRNOG00000054172	catenin beta 1(Ctnnb1)
Ctnnbip1	0.405736	-0.626413	0.815165	-0.35332	0.713575	-0.994079	0.0791227	-1.09496	0.985702	-0.0167025	ENSRNOG00000016313	catenin, beta-interacting protein 1(Ctnnbip1)
Ctnnbl1	0.049591	-0.191133	0.97974	0.0143041	0.999979	0.110431	0.243932	-0.152137	0.0279804	-0.277718	ENSRNOG00000012021	catenin, beta like 1(Ctnnbl1)
Ctnnd1	0.759455	0.0716841	0.301552	-0.303768	0.999979	-0.153119	0.00231364	-0.540712	0.0870518	-0.339165	ENSRNOG00000030790	catenin delta 1(Ctnnd1)
Ctns	0.634673	0.139027	0.899333	-0.0531425	0.983699	0.172293	1.74927e-06	0.564967	0.00243604	0.39786	ENSRNOG00000028688	cystinosin, lysosomal cystine transporter(Ctns)
Ctps1	8.58277e-07	-0.490772	0.508413	-0.200728	0.999979	-0.164138	1.45767e-06	-0.712348	0.000539619	-0.552447	ENSRNOG00000009963	CTP synthase 1(Ctps1)
Ctps2	2.91015e-05	0.373147	0.9595	-0.0310789	0.935343	0.221684	0.539858	-0.111064	0.0499719	-0.318181	ENSRNOG00000004257	CTP synthase 2(Ctps2)
Ctr9	9.57124e-06	0.355611	0.940986	0.0315228	0.602221	0.218866	0.645993	-0.0674668	0.0188935	-0.290266	ENSRNOG00000017195	CTR9 homolog, Paf1/RNA polymerase II complex component(Ctr9)
Ctrl	na	na	0.690696	-0.598249	0.976701	0.713224	0.567526	0.417216	0.826316	-0.197879	ENSRNOG00000019353	chymotrypsin-like(Ctrl)
Ctsa	8.17096e-12	0.576881	0.32982	0.137446	0.999979	0.0865896	0.259403	0.106475	0.874774	0.0193221	ENSRNOG00000015857	-
Ctsb	0.0954944	0.144145	0.978911	-0.0108437	0.830521	0.15136	0.620724	-0.0510259	0.0190085	-0.205482	ENSRNOG00000010331	cathepsin B(Ctsb)
Ctsc	0.801812	-0.0302578	0.915356	0.0533169	0.141517	0.607855	4.85087e-10	0.86577	0.228897	0.212049	ENSRNOG00000016496	cathepsin C(Ctsc)
Ctsd	0.0788841	0.294746	0.584734	0.195301	0.999979	-0.0797838	0.275299	0.210482	0.146483	0.283198	ENSRNOG00000020206	cathepsin D(Ctsd)
Ctse	1.77249e-20	0.752659	0.74978	-0.148653	0.999979	0.0449925	0.0488515	-0.38989	0.062773	-0.389632	ENSRNOG00000006963	cathepsin E(Ctse)
Ctsf	2.77246e-13	1.36883	0.915083	-0.0555075	0.999979	-0.127927	0.219974	-0.211289	0.870795	-0.036654	ENSRNOG00000019708	cathepsin F(Ctsf)
Ctsh	na	na	0.579438	-1.02477	0.656845	-1.55378	0.737051	-0.381862	0.273955	1.05726	ENSRNOG00000014064	cathepsin H(Ctsh)
Ctsk	na	0.383187	0.396449	0.746201	0.982953	0.543475	0.268251	0.618453	0.850516	0.141826	ENSRNOG00000021155	cathepsin K(Ctsk)
Ctsl	2.20658e-18	1.11655	0.803518	-0.0906683	0.999979	0.0458266	0.35346	0.146781	0.454749	0.128659	ENSRNOG00000018566	cathepsin L(Ctsl)
[truncated: 8,857 more rows]
